# Supplementary material for: Microbial ecology along the buffalo digestive tract provides insights to their functions and interactions with the host
Source: Research Square preprint supplement (doi:10.21203/rs.3.rs-294016/v1), 2021-03-26
Supplement: Supplementary file 3 [file 2c44b354c91527496a138096.xlsx]

## Sheet: Table 9
Genome	MAG	SampleID	Assembly_style	completeness	contamination	size	N50	Clade	Kingdom	Phylum	Class	Order	Family	Genus	Species	Strain	barrnap_desc	tRNA_num	contig_number	shortest_contig	longest_contig	quality
megahit_ABCN1_bin.16	MAG-0001	ABCN1	megahit	82.6	3.49	1087707	10509	d__Archaea;p__Halobacterota;c__Methanomicrobia;o__Methanomicrobiales;f__Methanocorpusculaceae;g__Methanocorpusculum;	Archaea	Halobacterota	Methanomicrobia	Methanomicrobiales	Methanocorpusculaceae	Methanocorpusculum	unclassified	unclassified	5S ribosomal RNA,5S ribosomal RNA	20	137	2510	60148	medium
megahit_ABCN1_bin.50	MAG-0002	ABCN1	megahit	86.79	2.96	1329145	12353	d__Bacteria;p__Firmicutes_A;c__Clostridia;o__4C28d	Bacteria	Firmicutes_A	Clostridia	4C28d-15	CAG-727	unclassified	unclassified	unclassified	16S ribosomal RNA (partial),5S ribosomal RNA,5S ribosomal RNA,16S ribosomal RNA (partial)	20	140	2512	43057	medium
megahit_ABCN1_bin.8	MAG-0003	ABCN1	megahit	87.24	0.54	2069924	20690	d__Bacteria;p__Bacteroidota;c__Bacteroidia;o__Bacteroidales;f__Paludibacteraceae;	Bacteria	Bacteroidota	Bacteroidia	Bacteroidales	Paludibacteraceae	unclassified	unclassified	unclassified	5S ribosomal RNA,5S ribosomal RNA	19	137	2644	57920	medium
megahit_ABCN10_bin.11	MAG-0004	ABCN10	megahit	89.13	2.96	1627167	11422	d__Bacteria;p__Bacteroidota;c__Bacteroidia;o__Bacteroidales;f__Rikenellaceae;g__Alistipes;	Bacteria	Bacteroidota	Bacteroidia	Bacteroidales	Rikenellaceae	Alistipes	unclassified	unclassified		16	179	2549	75906	medium
megahit_ABCN10_bin.17	MAG-0005	ABCN10	megahit	88.48	7.36	2875561	11686	d__Bacteria;p__Verrucomicrobiota;c__Lentisphaeria;o__Victivallales;f__UBA1829;	Bacteria	Verrucomicrobiota	Lentisphaeria	Victivallales	UBA1829	unclassified	unclassified	unclassified	16S ribosomal RNA (partial)	17	326	2538	62525	medium
megahit_ABCN10_bin.5	MAG-0006	ABCN10	megahit	84.04	5.3	1535082	6668	d__Bacteria;p__Firmicutes_A;c__Clostridia;o__Oscillospirales;f__CAG	Bacteria	Firmicutes_A	Clostridia	Oscillospirales	CAG-272	unclassified	unclassified	unclassified		16	257	2502	30874	medium
megahit_ABCN11_bin.2	MAG-0007	ABCN11	megahit	91.57	2.4	1537796	9678	d__Bacteria;p__Firmicutes_A;c__Clostridia;o__Oscillospirales;f__CAG	Bacteria	Firmicutes_A	Clostridia	Oscillospirales	CAG-272	unclassified	unclassified	unclassified	5S ribosomal RNA	16	198	2540	32484	high
megahit_ABCN11_bin.34	MAG-0008	ABCN11	megahit	96.74	1.34	2944046	31675	d__Bacteria;p__Firmicutes_A;c__Clostridia;o__Oscillospirales;f__CAG	Bacteria	Firmicutes_A	Clostridia	Oscillospirales	CAG-272	Firm-07	unclassified	unclassified		19	154	2646	123725	high
megahit_ABCN12_bin.12	MAG-0009	ABCN12	megahit	90.46	1.61	2419107	16202	d__Bacteria;p__Bacteroidota;c__Bacteroidia;o__Bacteroidales;f__Paludibacteraceae;g__UBA1181;	Bacteria	Bacteroidota	Bacteroidia	Bacteroidales	Paludibacteraceae	UBA1181	unclassified	unclassified		19	201	2512	57986	high
megahit_ABCN12_bin.26	MAG-0010	ABCN12	megahit	85.81	4.93	2425891	11615	d__Bacteria;p__Verrucomicrobiota;c__Lentisphaeria;o__Victivallales;f__UBA1829;	Bacteria	Verrucomicrobiota	Lentisphaeria	Victivallales	UBA1829	unclassified	unclassified	unclassified		20	282	2504	52821	medium
megahit_ABCN12_bin.44	MAG-0011	ABCN12	megahit	80.15	2.36	1907386	6929	d__Bacteria;p__Verrucomicrobiota;c__Verrucomicrobiae;o__Opitutales;f__CAG	Bacteria	Verrucomicrobiota	Verrucomicrobiae	Opitutales	CAG-312	CAG-312	unclassified	unclassified		15	316	2517	25611	medium
megahit_ABCN13_bin.12	MAG-0012	ABCN13	megahit	87.35	0	1923436	84365	d__Bacteria;p__Bacteroidota;c__Bacteroidia;o__Bacteroidales;f__Paludibacteraceae;	Bacteria	Bacteroidota	Bacteroidia	Bacteroidales	Paludibacteraceae	unclassified	unclassified	unclassified	5S ribosomal RNA	20	47	2628	167635	medium
megahit_ABCN13_bin.23	MAG-0013	ABCN13	megahit	83.76	2.32	1538784	10361	d__Bacteria;p__Bacteroidota;c__Bacteroidia;o__Bacteroidales;f__Rikenellaceae;g__Alistipes;	Bacteria	Bacteroidota	Bacteroidia	Bacteroidales	Rikenellaceae	Alistipes	unclassified	unclassified	5S ribosomal RNA,5S ribosomal RNA	16	185	2519	31432	medium
megahit_ABCN13_bin.25	MAG-0014	ABCN13	megahit	93.38	2.88	1889546	20287	d__Bacteria;p__Bacteroidota;c__Bacteroidia;o__Bacteroidales;f__Rikenellaceae;g__Alistipes;	Bacteria	Bacteroidota	Bacteroidia	Bacteroidales	Rikenellaceae	Alistipes	unclassified	unclassified	5S ribosomal RNA	16	139	2546	56369	high
megahit_ABCN13_bin.32	MAG-0015	ABCN13	megahit	81.7	1.31	1038090	7717	d__Archaea;p__Halobacterota;c__Methanomicrobia;o__Methanomicrobiales;f__Methanocorpusculaceae;g__Methanocorpusculum;	Archaea	Halobacterota	Methanomicrobia	Methanomicrobiales	Methanocorpusculaceae	Methanocorpusculum	unclassified	unclassified	5S ribosomal RNA	20	154	2505	25785	medium
megahit_ABCN13_bin.33	MAG-0016	ABCN13	megahit	92.15	1.7	1782794	13645	d__Bacteria;p__Firmicutes_A;c__Clostridia;o__Oscillospirales;f__CAG	Bacteria	Firmicutes_A	Clostridia	Oscillospirales	CAG-272	unclassified	unclassified	unclassified	16S ribosomal RNA (partial)	15	177	2561	40569	high
megahit_ABCN13_bin.4	MAG-0017	ABCN13	megahit	80.69	2.59	1791082	17128	d__Bacteria;p__Bacteroidota;c__Bacteroidia;o__Bacteroidales;f__Rikenellaceae;g__Alistipes;	Bacteria	Bacteroidota	Bacteroidia	Bacteroidales	Rikenellaceae	Alistipes	unclassified	unclassified	5S ribosomal RNA	18	141	2503	66393	medium
megahit_ABCN14_bin.19	MAG-0018	ABCN14	megahit	82.76	1.32	1889687	8409	d__Bacteria;p__Bacteroidota;c__Bacteroidia;o__Bacteroidales;f__Muribaculaceae;g__UBA7173_A;	Bacteria	Bacteroidota	Bacteroidia	Bacteroidales	Muribaculaceae	UBA7173_A	unclassified	unclassified		17	271	2505	31588	medium
megahit_ABCN14_bin.24	MAG-0019	ABCN14	megahit	83.76	3.4	1100155	8929	d__Bacteria;p__Proteobacteria;c__Alphaproteobacteria;o__RF32;f__CAG	Bacteria	Proteobacteria	Alphaproteobacteria	RF32	CAG-239	CAG-495	unclassified	unclassified		15	156	2564	28328	medium
megahit_ABCN14_bin.34	MAG-0020	ABCN14	megahit	87.3	1.4	1197404	6977	d__Bacteria;p__Firmicutes_A;c__Clostridia;o__4C28d	Bacteria	Firmicutes_A	Clostridia	4C28d-15	CAG-727	QALS01	unclassified	unclassified		13	197	2500	19340	medium
megahit_ABCN14_bin.42	MAG-0021	ABCN14	megahit	94.74	0.13	1676715	30323	d__Bacteria;p__Firmicutes_A;c__Clostridia;o__Oscillospirales;f__Acutalibacteraceae;g__UBA737;	Bacteria	Firmicutes_A	Clostridia	Oscillospirales	Acutalibacteraceae	UBA737	unclassified	unclassified	5S ribosomal RNA,5S ribosomal RNA,16S ribosomal RNA,23S ribosomal RNA (partial),5S ribosomal RNA,5S ribosomal RNA	20	77	2517	135252	high
megahit_ABCN14_bin.49	MAG-0022	ABCN14	megahit	88.75	0.02	1496168	34329	d__Bacteria;p__Firmicutes_A;c__Clostridia;o__Oscillospirales;f__CAG	Bacteria	Firmicutes_A	Clostridia	Oscillospirales	CAG-272	unclassified	unclassified	unclassified		17	67	2866	98886	medium
megahit_ABCN14_bin.50	MAG-0023	ABCN14	megahit	89.16	2.5	1475755	15480	d__Bacteria;p__Firmicutes_A;c__Clostridia;o__Oscillospirales;f__CAG	Bacteria	Firmicutes_A	Clostridia	Oscillospirales	CAG-272	unclassified	unclassified	unclassified		14	135	2511	71813	medium
megahit_ABCN14_bin.65	MAG-0024	ABCN14	megahit	93.5	0.84	1575477	25637	d__Bacteria;p__Bacteroidota;c__Bacteroidia;o__Bacteroidales;f__Rikenellaceae;g__Alistipes;	Bacteria	Bacteroidota	Bacteroidia	Bacteroidales	Rikenellaceae	Alistipes	unclassified	unclassified	5S ribosomal RNA (partial)	17	87	3713	82458	high
megahit_ABCN14_bin.66	MAG-0025	ABCN14	megahit	84.66	2.91	1710561	8938	d__Bacteria;p__Firmicutes_A;c__Clostridia;o__Oscillospirales;f__CAG	Bacteria	Firmicutes_A	Clostridia	Oscillospirales	CAG-272	unclassified	unclassified	unclassified	5S ribosomal RNA	16	246	2522	30807	medium
megahit_ABCN15_bin.18	MAG-0026	ABCN15	megahit	81.81	0.34	1381493	11629	d__Bacteria;p__Firmicutes_A;c__Clostridia;o__Oscillospirales;f__CAG	Bacteria	Firmicutes_A	Clostridia	Oscillospirales	CAG-272	unclassified	unclassified	unclassified		17	156	2603	36539	medium
megahit_ABCN15_bin.32	MAG-0027	ABCN15	megahit	80.71	1.34	1717099	13172	d__Bacteria;p__Firmicutes_A;c__Clostridia;o__Oscillospirales;f__CAG	Bacteria	Firmicutes_A	Clostridia	Oscillospirales	CAG-272	unclassified	unclassified	unclassified		15	170	2506	48592	medium
megahit_ABCN15_bin.39	MAG-0028	ABCN15	megahit	82.64	6.59	4197380	16169	d__Bacteria;p__Verrucomicrobiota;c__Kiritimatiellae;o__RFP12;f__UBA1067;g__UBA1731;	Bacteria	Verrucomicrobiota	Kiritimatiellae	RFP12	UBA1067	UBA1731	unclassified	unclassified	16S ribosomal RNA (partial)	19	380	2510	54471	low
megahit_ABCN15_bin.49	MAG-0029	ABCN15	megahit	96.2	1.34	1668098	51238	d__Bacteria;p__Firmicutes_A;c__Clostridia;o__Oscillospirales;f__CAG	Bacteria	Firmicutes_A	Clostridia	Oscillospirales	CAG-272	unclassified	unclassified	unclassified		19	67	2977	175473	high
megahit_ABCN15_bin.62	MAG-0030	ABCN15	megahit	91.24	1.51	1819796	17717	d__Bacteria;p__Firmicutes_A;c__Clostridia;o__Oscillospirales;f__CAG	Bacteria	Firmicutes_A	Clostridia	Oscillospirales	CAG-272	unclassified	unclassified	unclassified		17	146	2544	104319	high
megahit_ABCN15_bin.65	MAG-0031	ABCN15	megahit	82.45	3.6	1796503	14063	d__Bacteria;p__Verrucomicrobiota;c__Kiritimatiellae;o__RFP12;f__UBA1067;g__UBA1067;	Bacteria	Verrucomicrobiota	Kiritimatiellae	RFP12	UBA1067	UBA1067	unclassified	unclassified	5S ribosomal RNA,5S ribosomal RNA	19	157	2507	47497	medium
megahit_ABCN16_bin.1	MAG-0032	ABCN16	megahit	96.43	1.68	1858796	41761	d__Bacteria;p__Firmicutes_A;c__Clostridia;o__Oscillospirales;f__Oscillospiraceae;g__CAG	Bacteria	Firmicutes_A	Clostridia	Oscillospirales	Oscillospiraceae	CAG-110	unclassified	unclassified	5S ribosomal RNA,5S ribosomal RNA	20	81	2608	156154	high
megahit_ABCN16_bin.10	MAG-0033	ABCN16	megahit	93.76	0.27	1777156	17143	d__Bacteria;p__Bacteroidota;c__Bacteroidia;o__Bacteroidales;f__Paludibacteraceae;g__RUG163;	Bacteria	Bacteroidota	Bacteroidia	Bacteroidales	Paludibacteraceae	RUG163	unclassified	unclassified		20	132	2512	47273	high
megahit_ABCN16_bin.25	MAG-0034	ABCN16	megahit	81.73	2.39	2305756	16013	d__Bacteria;p__Verrucomicrobiota;c__Kiritimatiellae;o__RFP12;f__UBA1067;g__UBA1067;	Bacteria	Verrucomicrobiota	Kiritimatiellae	RFP12	UBA1067	UBA1067	unclassified	unclassified	5S ribosomal RNA	18	186	2587	43417	medium
megahit_ABCN16_bin.48	MAG-0035	ABCN16	megahit	94.35	0	1732055	66943	d__Bacteria;p__Bacteroidota;c__Bacteroidia;o__Bacteroidales;f__Paludibacteraceae;g__RUG163;	Bacteria	Bacteroidota	Bacteroidia	Bacteroidales	Paludibacteraceae	RUG163	unclassified	unclassified	5S ribosomal RNA (partial),5S ribosomal RNA (partial),5S ribosomal RNA	20	41	2531	172369	high
megahit_ABCN18_bin.32	MAG-0036	ABCN18	megahit	96.46	2.41	1852284	35392	d__Bacteria;p__Bacteroidota;c__Bacteroidia;o__Bacteroidales;f__Paludibacteraceae;g__RUG163;	Bacteria	Bacteroidota	Bacteroidia	Bacteroidales	Paludibacteraceae	RUG163	unclassified	unclassified	5S ribosomal RNA,5S ribosomal RNA	20	93	2574	100639	high
megahit_ABCN18_bin.35	MAG-0037	ABCN18	megahit	85.62	0.27	1312214	12528	d__Bacteria;p__Firmicutes_A;c__Clostridia;o__4C28d	Bacteria	Firmicutes_A	Clostridia	4C28d-15	unclassified	unclassified	unclassified	unclassified	5S ribosomal RNA	15	135	2502	41305	medium
megahit_ABCN18_bin.36	MAG-0038	ABCN18	megahit	81.37	0.65	1095540	12149	d__Archaea;p__Halobacterota;c__Methanomicrobia;o__Methanomicrobiales;f__Methanocorpusculaceae;g__Methanocorpusculum;	Archaea	Halobacterota	Methanomicrobia	Methanomicrobiales	Methanocorpusculaceae	Methanocorpusculum	unclassified	unclassified	16S ribosomal RNA,23S ribosomal RNA,5S ribosomal RNA	20	120	2548	38524	medium
megahit_ABCN19_bin.12	MAG-0039	ABCN19	megahit	92.6	0.02	1675282	14755	d__Bacteria;p__Firmicutes_A;c__Clostridia;o__Oscillospirales;f__CAG	Bacteria	Firmicutes_A	Clostridia	Oscillospirales	CAG-272	unclassified	unclassified	unclassified		19	162	2510	44480	high
megahit_ABCN19_bin.14	MAG-0040	ABCN19	megahit	82.59	3.15	1666421	9589	d__Bacteria;p__Firmicutes_A;c__Clostridia;o__Oscillospirales;f__CAG	Bacteria	Firmicutes_A	Clostridia	Oscillospirales	CAG-272	unclassified	unclassified	unclassified	16S ribosomal RNA (partial)	18	212	2519	38522	medium
megahit_ABCN19_bin.30	MAG-0041	ABCN19	megahit	87.18	2.37	1557774	19956	d__Bacteria;p__Firmicutes_A;c__Clostridia;o__Oscillospirales;f__CAG	Bacteria	Firmicutes_A	Clostridia	Oscillospirales	CAG-272	unclassified	unclassified	unclassified		17	102	2551	64209	medium
megahit_ABCN19_bin.36	MAG-0042	ABCN19	megahit	91.96	3.77	1978202	10770	d__Bacteria;p__Bacteroidota;c__Bacteroidia;o__Bacteroidales;f__Rikenellaceae;g__Alistipes;	Bacteria	Bacteroidota	Bacteroidia	Bacteroidales	Rikenellaceae	Alistipes	unclassified	unclassified	5S ribosomal RNA	16	228	2543	36309	high
megahit_ABCN19_bin.41	MAG-0043	ABCN19	megahit	83.37	2.47	1940084	7146	d__Bacteria;p__Firmicutes_A;c__Clostridia;o__Oscillospirales;f__CAG	Bacteria	Firmicutes_A	Clostridia	Oscillospirales	CAG-272	unclassified	unclassified	unclassified	5S ribosomal RNA (partial)	16	306	2504	32777	medium
megahit_ABCN2_bin.27	MAG-0044	ABCN2	megahit	83.95	0.65	1104799	10487	d__Archaea;p__Halobacterota;c__Methanomicrobia;o__Methanomicrobiales;f__Methanocorpusculaceae;g__Methanocorpusculum;	Archaea	Halobacterota	Methanomicrobia	Methanomicrobiales	Methanocorpusculaceae	Methanocorpusculum	unclassified	unclassified	5S ribosomal RNA	20	137	2502	36256	medium
megahit_ABCN2_bin.40	MAG-0045	ABCN2	megahit	93.94	2.01	1965231	27067	d__Bacteria;p__Firmicutes_A;c__Clostridia;o__Oscillospirales;f__CAG	Bacteria	Firmicutes_A	Clostridia	Oscillospirales	CAG-272	Firm-07	unclassified	unclassified	5S ribosomal RNA	19	120	2760	86596	high
megahit_ABCN20_bin.11	MAG-0046	ABCN20	megahit	84.01	2.34	1534144	11636	d__Bacteria;p__Firmicutes_A;c__Clostridia;o__4C28d	Bacteria	Firmicutes_A	Clostridia	4C28d-15	DTU072	unclassified	unclassified	unclassified	23S ribosomal RNA (partial)	20	165	2543	60122	medium
megahit_ABCN20_bin.26	MAG-0047	ABCN20	megahit	89.33	1.12	995403	43463	d__Bacteria;p__Firmicutes_A;c__Clostridia;o__4C28d	Bacteria	Firmicutes_A	Clostridia	4C28d-15	UBA1242	UBA4626	unclassified	unclassified	23S ribosomal RNA (partial),5S ribosomal RNA	20	43	2652	114043	medium
megahit_ABCN20_bin.4	MAG-0048	ABCN20	megahit	83.66	1.96	1127684	9769	d__Archaea;p__Halobacterota;c__Methanomicrobia;o__Methanomicrobiales;f__Methanocorpusculaceae;g__Methanocorpusculum;	Archaea	Halobacterota	Methanomicrobia	Methanomicrobiales	Methanocorpusculaceae	Methanocorpusculum	unclassified	unclassified	5S ribosomal RNA,23S ribosomal RNA,16S ribosomal RNA	17	150	2510	37337	medium
megahit_ABCN21_bin.30	MAG-0049	ABCN21	megahit	88.72	2.58	1956275	9470	d__Bacteria;p__Firmicutes_A;c__Clostridia;o__Oscillospirales;f__CAG	Bacteria	Firmicutes_A	Clostridia	Oscillospirales	CAG-272	unclassified	unclassified	unclassified		17	266	2512	27260	medium
megahit_ABCN21_bin.52	MAG-0050	ABCN21	megahit	85.71	1.1	898177	17718	d__Bacteria;p__Proteobacteria;c__Alphaproteobacteria;o__Rs	Bacteria	Proteobacteria	Alphaproteobacteria	Rs-D84	Rs-D84	Rs-D84	unclassified	unclassified	16S ribosomal RNA,23S ribosomal RNA	19	71	2771	58769	medium
megahit_ABCN22_bin.11	MAG-0051	ABCN22	megahit	98.32	1.58	1843373	102587	d__Bacteria;p__Bacteroidota;c__Bacteroidia;o__Bacteroidales;f__Rikenellaceae;g__Alistipes;	Bacteria	Bacteroidota	Bacteroidia	Bacteroidales	Rikenellaceae	Alistipes	unclassified	unclassified	5S ribosomal RNA,5S ribosomal RNA	20	27	2943	238255	high
megahit_ABCN23_bin.13	MAG-0052	ABCN23	megahit	89.54	0.67	1346697	9291	d__Bacteria;p__Firmicutes_A;c__Clostridia;o__Oscillospirales;f__CAG	Bacteria	Firmicutes_A	Clostridia	Oscillospirales	CAG-272	UBA1740	unclassified	unclassified		15	185	2519	41608	medium
megahit_ABCN23_bin.53	MAG-0053	ABCN23	megahit	96.8	0	2837364	50559	d__Bacteria;p__Spirochaetota;c__GWE2	Bacteria	Spirochaetota	GWE2-31-10	GWE2-31-10	GWE2-31-10	unclassified	unclassified	unclassified		20	92	2501	135352	high
megahit_ABCN23_bin.6	MAG-0054	ABCN23	megahit	88.17	2.7	2666650	15255	d__Bacteria;p__Verrucomicrobiota;c__Lentisphaeria;o__Victivallales;f__Victivallaceae;	Bacteria	Verrucomicrobiota	Lentisphaeria	Victivallales	Victivallaceae	unclassified	unclassified	unclassified	16S ribosomal RNA (partial)	20	240	2505	70061	medium
megahit_ABCN24_bin.15	MAG-0055	ABCN24	megahit	86.81	0.2	974652	24328	d__Bacteria;p__Proteobacteria;c__Alphaproteobacteria;o__Rs	Bacteria	Proteobacteria	Alphaproteobacteria	Rs-D84	Rs-D84	Rs-D84	unclassified	unclassified		20	52	3713	56823	medium
megahit_ABCN24_bin.25	MAG-0056	ABCN24	megahit	93.06	0.56	1993938	15253	d__Bacteria;p__Firmicutes_A;c__Clostridia;o__Oscillospirales;f__CAG	Bacteria	Firmicutes_A	Clostridia	Oscillospirales	CAG-272	Firm-07	unclassified	unclassified	5S ribosomal RNA	18	171	2550	54405	high
megahit_ABCN24_bin.32	MAG-0057	ABCN24	megahit	89.92	1.59	2638877	10885	d__Bacteria;p__Firmicutes_A;c__Clostridia;o__Oscillospirales;f__CAG	Bacteria	Firmicutes_A	Clostridia	Oscillospirales	CAG-272	unclassified	unclassified	unclassified	5S ribosomal RNA	20	337	2509	32794	medium
megahit_ABCN24_bin.52	MAG-0058	ABCN24	megahit	85.42	3.73	1566723	9694	d__Bacteria;p__Bacteroidota;c__Bacteroidia;o__Bacteroidales;f__Rikenellaceae;g__Alistipes;	Bacteria	Bacteroidota	Bacteroidia	Bacteroidales	Rikenellaceae	Alistipes	unclassified	unclassified	5S ribosomal RNA,5S ribosomal RNA	16	201	2522	47954	medium
megahit_ABCN24_bin.54	MAG-0059	ABCN24	megahit	87.16	2.8	1503744	7979	d__Bacteria;p__Firmicutes_A;c__Clostridia;o__Oscillospirales;f__CAG	Bacteria	Firmicutes_A	Clostridia	Oscillospirales	CAG-272	unclassified	unclassified	unclassified		17	220	2503	31605	medium
megahit_ABCN24_bin.57	MAG-0060	ABCN24	megahit	83.67	2.63	2182584	10133	d__Bacteria;p__Firmicutes_A;c__Clostridia;o__Oscillospirales;f__CAG	Bacteria	Firmicutes_A	Clostridia	Oscillospirales	CAG-272	Firm-07	unclassified	unclassified		15	255	2504	69471	medium
megahit_ABCN24_bin.9	MAG-0061	ABCN24	megahit	96.54	1.63	1994691	38899	d__Bacteria;p__Bacteroidota;c__Bacteroidia;o__Bacteroidales;f__Rikenellaceae;g__Alistipes;	Bacteria	Bacteroidota	Bacteroidia	Bacteroidales	Rikenellaceae	Alistipes	unclassified	unclassified		20	70	3271	105551	high
megahit_ABCN25_bin.10	MAG-0062	ABCN25	megahit	91.84	6.32	1220990	11366	d__Bacteria;p__Firmicutes_A;c__Clostridia;o__4C28d	Bacteria	Firmicutes_A	Clostridia	4C28d-15	CAG-727	QALS01	unclassified	unclassified	5S ribosomal RNA (partial)	13	139	2506	49588	medium
megahit_ABCN25_bin.57	MAG-0063	ABCN25	megahit	87.28	8.17	2140487	55660	d__Bacteria;p__Bacteroidota;c__Bacteroidia;o__Bacteroidales;f__Paludibacteraceae;g__RF16;	Bacteria	Bacteroidota	Bacteroidia	Bacteroidales	Paludibacteraceae	RF16	unclassified	unclassified	5S ribosomal RNA	20	88	2577	143257	low
megahit_ABCN25_bin.7	MAG-0064	ABCN25	megahit	81.97	2.35	2143183	16747	d__Bacteria;p__Bacteroidota;c__Bacteroidia;o__Bacteroidales;f__Rikenellaceae;g__Alistipes;	Bacteria	Bacteroidota	Bacteroidia	Bacteroidales	Rikenellaceae	Alistipes	unclassified	unclassified		19	169	2707	73434	medium
megahit_ABCN26_bin.16	MAG-0065	ABCN26	megahit	83.5	0.65	1123307	10155	d__Archaea;p__Halobacterota;c__Methanomicrobia;o__Methanomicrobiales;f__Methanocorpusculaceae;g__Methanocorpusculum;	Archaea	Halobacterota	Methanomicrobia	Methanomicrobiales	Methanocorpusculaceae	Methanocorpusculum	unclassified	unclassified		19	143	2509	38736	medium
megahit_ABCN26_bin.41	MAG-0066	ABCN26	megahit	88.46	1.52	2159882	16828	d__Bacteria;p__Bacteroidota;c__Bacteroidia;o__Bacteroidales;f__Bacteroidaceae;	Bacteria	Bacteroidota	Bacteroidia	Bacteroidales	Bacteroidaceae	unclassified	unclassified	unclassified	5S ribosomal RNA	17	175	2509	70606	medium
megahit_ABCN26_bin.5	MAG-0067	ABCN26	megahit	90.28	1.22	1688829	14579	d__Bacteria;p__Bacteroidota;c__Bacteroidia;o__Bacteroidales;f__Rikenellaceae;g__Alistipes;	Bacteria	Bacteroidota	Bacteroidia	Bacteroidales	Rikenellaceae	Alistipes	unclassified	unclassified		18	153	2744	62446	high
megahit_ABCN26_bin.7	MAG-0068	ABCN26	megahit	87.61	8.41	1320583	7901	d__Bacteria;p__Firmicutes_A;c__Clostridia;o__4C28d	Bacteria	Firmicutes_A	Clostridia	4C28d-15	CAG-727	QALS01	unclassified	unclassified		11	203	2503	44728	low
megahit_ABCN27_bin.1	MAG-0069	ABCN27	megahit	81.56	8.36	1284465	7963	d__Bacteria;p__Firmicutes_A;c__Clostridia;o__Oscillospirales;f__Acutalibacteraceae;g__UBA737;	Bacteria	Firmicutes_A	Clostridia	Oscillospirales	Acutalibacteraceae	UBA737	unclassified	unclassified	5S ribosomal RNA (partial),5S ribosomal RNA	14	203	2535	41432	low
megahit_ABCN27_bin.15	MAG-0070	ABCN27	megahit	92.81	0.65	1324603	12173	d__Archaea;p__Halobacterota;c__Methanomicrobia;o__Methanomicrobiales;f__Methanocorpusculaceae;g__Methanocorpusculum;	Archaea	Halobacterota	Methanomicrobia	Methanomicrobiales	Methanocorpusculaceae	Methanocorpusculum	unclassified	unclassified		20	135	2558	42153	high
megahit_ABCN27_bin.21	MAG-0071	ABCN27	megahit	88.98	0.81	1796450	16603	d__Bacteria;p__Bacteroidota;c__Bacteroidia;o__Bacteroidales;f__P3;g__UBA3388;s__UBA3388	Bacteria	Bacteroidota	Bacteroidia	Bacteroidales	P3	UBA3388	UBA3388 sp002358855	unclassified		20	155	2540	82410	medium
megahit_ABCN27_bin.26	MAG-0072	ABCN27	megahit	84	5.27	2560205	7087	d__Bacteria;p__Spirochaetota;c__GWE2	Bacteria	Spirochaetota	GWE2-31-10	GWE2-31-10	GWE2-31-10	unclassified	unclassified	unclassified		19	416	2522	32183	medium
megahit_ABCN27_bin.50	MAG-0073	ABCN27	megahit	89.51	1.63	2960681	9861	d__Bacteria;p__Firmicutes_A;c__Clostridia;o__Oscillospirales;f__CAG	Bacteria	Firmicutes_A	Clostridia	Oscillospirales	CAG-272	CAG-448	unclassified	unclassified		19	365	2516	30516	medium
megahit_ABCN28_bin.20	MAG-0074	ABCN28	megahit	94.09	1.52	2131969	60950	d__Bacteria;p__Bacteroidota;c__Bacteroidia;o__Bacteroidales;f__Paludibacteraceae;g__RF16;	Bacteria	Bacteroidota	Bacteroidia	Bacteroidales	Paludibacteraceae	RF16	unclassified	unclassified	5S ribosomal RNA (partial),5S ribosomal RNA (partial)	20	71	2609	217519	high
megahit_ABCN28_bin.25	MAG-0075	ABCN28	megahit	83.41	4.36	2210228	8343	d__Bacteria;p__Firmicutes_A;c__Clostridia;o__Oscillospirales;f__CAG	Bacteria	Firmicutes_A	Clostridia	Oscillospirales	CAG-272	UBA1740	unclassified	unclassified		12	322	2513	36953	medium
megahit_ABCN28_bin.41	MAG-0076	ABCN28	megahit	97.05	1.75	2427015	39005	d__Bacteria;p__Spirochaetota;c__Spirochaetia;o__Treponematales;f__Treponemataceae;g__CETP13;	Bacteria	Spirochaetota	Spirochaetia	Treponematales	Treponemataceae	CETP13	unclassified	unclassified	5S ribosomal RNA,5S ribosomal RNA	20	102	2701	112667	high
megahit_ABCN28_bin.48	MAG-0077	ABCN28	megahit	81.73	6.08	2006410	36460	d__Bacteria;p__Verrucomicrobiota;c__Kiritimatiellae;o__RFP12;	Bacteria	Verrucomicrobiota	Kiritimatiellae	RFP12	unclassified	unclassified	unclassified	unclassified	5S ribosomal RNA,5S ribosomal RNA,5S ribosomal RNA	20	95	2586	98029	medium
megahit_ABCN28_bin.52	MAG-0078	ABCN28	megahit	96.17	1.34	1431995	15428	d__Bacteria;p__Firmicutes_A;c__Clostridia;o__Oscillospirales;f__Oscillospiraceae;g__CAG	Bacteria	Firmicutes_A	Clostridia	Oscillospirales	Oscillospiraceae	CAG-110	unclassified	unclassified	5S ribosomal RNA,5S ribosomal RNA	20	131	2509	47445	high
megahit_ABCN28_bin.54	MAG-0079	ABCN28	megahit	99.08	1.99	2221304	24879	d__Bacteria;p__Firmicutes_A;c__Clostridia;o__Oscillospirales;f__CAG	Bacteria	Firmicutes_A	Clostridia	Oscillospirales	CAG-272	unclassified	unclassified	unclassified		19	149	2511	90863	high
megahit_ABCN28_bin.55	MAG-0080	ABCN28	megahit	89.49	2.68	1795419	16028	d__Bacteria;p__Firmicutes_A;c__Clostridia;o__Oscillospirales;f__Acutalibacteraceae;	Bacteria	Firmicutes_A	Clostridia	Oscillospirales	Acutalibacteraceae	unclassified	unclassified	unclassified	5S ribosomal RNA	17	138	2563	67321	medium
megahit_ABCN28_bin.60	MAG-0081	ABCN28	megahit	94.96	3.46	1795751	31824	d__Bacteria;p__Bacteroidota;c__Bacteroidia;o__Bacteroidales;f__Rikenellaceae;g__Alistipes;	Bacteria	Bacteroidota	Bacteroidia	Bacteroidales	Rikenellaceae	Alistipes	unclassified	unclassified	16S ribosomal RNA (partial)	17	84	3205	75557	high
megahit_ABCN28_bin.71	MAG-0082	ABCN28	megahit	93.48	1.09	1499983	42253	d__Bacteria;p__Firmicutes_A;c__Clostridia;o__4C28d	Bacteria	Firmicutes_A	Clostridia	4C28d-15	CAG-727	QALS01	unclassified	unclassified	5S ribosomal RNA,16S ribosomal RNA (partial)	18	49	2847	95587	high
megahit_ABCN29_bin.1	MAG-0083	ABCN29	megahit	84.82	8.51	1406462	5520	d__Bacteria;p__Bacteroidota;c__Bacteroidia;o__Bacteroidales;f__Rikenellaceae;	Bacteria	Bacteroidota	Bacteroidia	Bacteroidales	Rikenellaceae	unclassified	unclassified	unclassified		14	277	2514	20480	low
megahit_ABCN29_bin.13	MAG-0084	ABCN29	megahit	80.33	1.68	1897988	10813	d__Bacteria;p__Firmicutes_A;c__Clostridia;o__Oscillospirales;f__CAG	Bacteria	Firmicutes_A	Clostridia	Oscillospirales	CAG-272	UBA1740	unclassified	unclassified		18	228	2519	40277	medium
megahit_ABCN29_bin.19	MAG-0085	ABCN29	megahit	80.89	2.91	2082687	7851	d__Bacteria;p__Spirochaetota;c__Spirochaetia;o__Treponematales;f__Treponemataceae;	Bacteria	Spirochaetota	Spirochaetia	Treponematales	Treponemataceae	unclassified	unclassified	unclassified	16S ribosomal RNA (partial),5S ribosomal RNA	18	328	2509	36987	medium
megahit_ABCN29_bin.27	MAG-0086	ABCN29	megahit	82.95	3.75	2927552	12500	d__Bacteria;p__Firmicutes_A;c__Clostridia;o__Oscillospirales;f__CAG	Bacteria	Firmicutes_A	Clostridia	Oscillospirales	CAG-272	CAG-448	unclassified	unclassified		16	310	2516	51031	medium
megahit_ABCN29_bin.47	MAG-0087	ABCN29	megahit	93.35	1.08	1255722	13570	d__Bacteria;p__Firmicutes_A;c__Clostridia;o__4C28d	Bacteria	Firmicutes_A	Clostridia	4C28d-15	CAG-727	QALS01	unclassified	unclassified		9	123	2549	66580	high
megahit_ABCN29_bin.60	MAG-0088	ABCN29	megahit	88.96	0.71	2117213	50991	d__Bacteria;p__Verrucomicrobiota;c__Kiritimatiellae;o__RFP12;	Bacteria	Verrucomicrobiota	Kiritimatiellae	RFP12	unclassified	unclassified	unclassified	unclassified	16S ribosomal RNA,23S ribosomal RNA,5S ribosomal RNA,5S ribosomal RNA	20	57	3434	186862	medium
megahit_ABCN29_bin.71	MAG-0089	ABCN29	megahit	80.32	0	1585931	8655	d__Bacteria;p__Spirochaetota;c__Spirochaetia;o__Sphaerochaetales;f__Sphaerochaetaceae;g__UBA5920;	Bacteria	Spirochaetota	Spirochaetia	Sphaerochaetales	Sphaerochaetaceae	UBA5920	unclassified	unclassified	5S ribosomal RNA,5S ribosomal RNA	17	222	2502	28629	medium
megahit_ABCN29_bin.73	MAG-0090	ABCN29	megahit	87.07	1.87	1298461	30969	d__Bacteria;p__Firmicutes_A;c__Clostridia;o__4C28d	Bacteria	Firmicutes_A	Clostridia	4C28d-15	CAG-727	QALS01	unclassified	unclassified	16S ribosomal RNA (partial),5S ribosomal RNA (partial),5S ribosomal RNA (partial)	14	67	2530	116182	medium
megahit_ABCN29_bin.78	MAG-0091	ABCN29	megahit	83.69	3.65	2236459	15843	d__Bacteria;p__Bacteroidota;c__Bacteroidia;o__Bacteroidales;f__UBA932;g__RC9;	Bacteria	Bacteroidota	Bacteroidia	Bacteroidales	UBA932	RC9	unclassified	unclassified	23S ribosomal RNA (partial),5S ribosomal RNA,5S ribosomal RNA (partial)	17	218	2519	91798	medium
megahit_ABCN3_bin.15	MAG-0092	ABCN3	megahit	82.66	8.1	2004100	42537	d__Bacteria;p__Bacteroidota;c__Bacteroidia;o__Bacteroidales;f__UBA932;g__RC9;	Bacteria	Bacteroidota	Bacteroidia	Bacteroidales	UBA932	RC9	unclassified	unclassified		17	90	2536	115959	low
megahit_ABCN3_bin.18	MAG-0093	ABCN3	megahit	94.93	1.34	1868048	21188	d__Bacteria;p__Firmicutes_A;c__Clostridia;o__Oscillospirales;f__CAG	Bacteria	Firmicutes_A	Clostridia	Oscillospirales	CAG-272	Firm-07	unclassified	unclassified		19	126	2548	63364	high
megahit_ABCN3_bin.19	MAG-0094	ABCN3	megahit	92.56	3.5	2841523	31310	d__Bacteria;p__Firmicutes_A;c__Clostridia;o__Lachnospirales;f__Lachnospiraceae;	Bacteria	Firmicutes_A	Clostridia	Lachnospirales	Lachnospiraceae	unclassified	unclassified	unclassified	5S ribosomal RNA	20	176	2509	160577	high
megahit_ABCN3_bin.21	MAG-0095	ABCN3	megahit	86.38	4.1	1731493	25167	d__Bacteria;p__Bacteroidota;c__Bacteroidia;o__Bacteroidales;f__Rikenellaceae;g__Alistipes;	Bacteria	Bacteroidota	Bacteroidia	Bacteroidales	Rikenellaceae	Alistipes	unclassified	unclassified	5S ribosomal RNA	15	101	2781	71944	medium
megahit_ABCN3_bin.22	MAG-0096	ABCN3	megahit	95.25	1.68	2031917	27393	d__Bacteria;p__Bacteroidota;c__Bacteroidia;o__Bacteroidales;f__Rikenellaceae;g__Alistipes;	Bacteria	Bacteroidota	Bacteroidia	Bacteroidales	Rikenellaceae	Alistipes	unclassified	unclassified	5S ribosomal RNA,5S ribosomal RNA	17	113	2729	63719	high
megahit_ABCN3_bin.25	MAG-0097	ABCN3	megahit	83.27	0.78	1778465	11635	d__Bacteria;p__Firmicutes_A;c__Clostridia;o__Monoglobales;f__UBA1381;	Bacteria	Firmicutes_A	Clostridia	Monoglobales	UBA1381	unclassified	unclassified	unclassified		15	212	2505	53212	medium
megahit_ABCN3_bin.31	MAG-0098	ABCN3	megahit	88.17	1.34	1847557	96593	d__Bacteria;p__Bacteroidota;c__Bacteroidia;o__Bacteroidales;f__Paludibacteraceae;g__RF16;	Bacteria	Bacteroidota	Bacteroidia	Bacteroidales	Paludibacteraceae	RF16	unclassified	unclassified	5S ribosomal RNA	19	35	2592	203970	medium
megahit_ABCN3_bin.49	MAG-0099	ABCN3	megahit	94.21	0.57	2215029	26518	d__Bacteria;p__Bacteroidota;c__Bacteroidia;o__Bacteroidales;f__Muribaculaceae;g__UBA7173_A;	Bacteria	Bacteroidota	Bacteroidia	Bacteroidales	Muribaculaceae	UBA7173_A	unclassified	unclassified		20	118	2545	79301	high
megahit_ABCN3_bin.52	MAG-0100	ABCN3	megahit	91.76	0.74	2463448	90350	d__Bacteria;p__Bacteroidota;c__Bacteroidia;o__Bacteroidales;f__Bacteroidaceae;g__UBA4372;	Bacteria	Bacteroidota	Bacteroidia	Bacteroidales	Bacteroidaceae	UBA4372	unclassified	unclassified	16S ribosomal RNA (partial),5S ribosomal RNA	20	45	2661	228221	high
megahit_ABCN3_bin.7	MAG-0101	ABCN3	megahit	87.14	0.8	1729223	8945	d__Archaea;p__Euryarchaeota;c__Methanobacteria;o__Methanobacteriales;f__Methanobacteriaceae;g__Methanobrevibacter_A;	Archaea	Euryarchaeota	Methanobacteria	Methanobacteriales	Methanobacteriaceae	Methanobrevibacter_A	unclassified	unclassified		18	232	2501	42974	medium
megahit_ABCN3_bin.8	MAG-0102	ABCN3	megahit	91.88	1.69	1179810	14634	d__Bacteria;p__Firmicutes_A;c__Clostridia;o__4C28d	Bacteria	Firmicutes_A	Clostridia	4C28d-15	CAG-727	QALS01	unclassified	unclassified	5S ribosomal RNA,5S ribosomal RNA	15	116	2560	34931	high
megahit_ABCN30_bin.35	MAG-0103	ABCN30	megahit	96.42	1.34	1898415	35268	d__Bacteria;p__Firmicutes_A;c__Clostridia;o__Oscillospirales;f__CAG	Bacteria	Firmicutes_A	Clostridia	Oscillospirales	CAG-272	unclassified	unclassified	unclassified		20	96	2503	220380	high
megahit_ABCN30_bin.40	MAG-0104	ABCN30	megahit	87.73	1.34	1382139	7731	d__Bacteria;p__Firmicutes_A;c__Clostridia;o__Oscillospirales;f__CAG	Bacteria	Firmicutes_A	Clostridia	Oscillospirales	CAG-272	unclassified	unclassified	unclassified		16	223	2503	36825	medium
megahit_ABCN30_bin.41	MAG-0105	ABCN30	megahit	86.29	0.2	1422895	90126	d__Bacteria;p__Firmicutes_A;c__Clostridia;o__4C28d	Bacteria	Firmicutes_A	Clostridia	4C28d-15	CAG-727	QALS01	unclassified	unclassified	16S ribosomal RNA (partial),5S ribosomal RNA	19	24	5114	205531	medium
megahit_ABCN30_bin.5	MAG-0106	ABCN30	megahit	89.19	1.38	2195235	91237	d__Bacteria;p__Verrucomicrobiota;c__Kiritimatiellae;o__RFP12;	Bacteria	Verrucomicrobiota	Kiritimatiellae	RFP12	unclassified	unclassified	unclassified	unclassified	5S ribosomal RNA,5S ribosomal RNA	20	37	2637	237584	medium
megahit_ABCN30_bin.7	MAG-0107	ABCN30	megahit	88.26	4.56	2432235	23337	d__Bacteria;p__Verrucomicrobiota;c__Verrucomicrobiae;o__Verrucomicrobiales;f__Akkermansiaceae;g__Akkermansia;	Bacteria	Verrucomicrobiota	Verrucomicrobiae	Verrucomicrobiales	Akkermansiaceae	Akkermansia	unclassified	unclassified		20	157	2523	67247	medium
megahit_ABCN31_bin.21	MAG-0108	ABCN31	megahit	88.93	5.86	1655998	10542	d__Bacteria;p__Firmicutes_A;c__Clostridia;o__4C28d	Bacteria	Firmicutes_A	Clostridia	4C28d-15	CAG-727	QALS01	unclassified	unclassified		16	211	2563	44348	medium
megahit_ABCN31_bin.22	MAG-0109	ABCN31	megahit	83.55	1.01	1980139	6753	d__Bacteria;p__Firmicutes_A;c__Clostridia;o__Oscillospirales;f__CAG	Bacteria	Firmicutes_A	Clostridia	Oscillospirales	CAG-272	unclassified	unclassified	unclassified		13	327	2502	24998	medium
megahit_ABCN31_bin.38	MAG-0110	ABCN31	megahit	91.37	2.08	2062364	31358	d__Bacteria;p__Bacteroidota;c__Bacteroidia;o__Bacteroidales;f__Rikenellaceae;g__Alistipes;	Bacteria	Bacteroidota	Bacteroidia	Bacteroidales	Rikenellaceae	Alistipes	unclassified	unclassified		19	99	2612	99659	high
megahit_ABCN31_bin.46	MAG-0111	ABCN31	megahit	89.52	1.64	1520525	11916	d__Bacteria;p__Firmicutes_A;c__Clostridia;o__4C28d	Bacteria	Firmicutes_A	Clostridia	4C28d-15	CAG-727	unclassified	unclassified	unclassified	16S ribosomal RNA (partial),5S ribosomal RNA	19	182	2513	44834	medium
megahit_ABCN31_bin.7	MAG-0112	ABCN31	megahit	90.73	2.42	1212117	96038	d__Bacteria;p__Firmicutes_A;c__Clostridia;o__4C28d	Bacteria	Firmicutes_A	Clostridia	4C28d-15	CAG-727	unclassified	unclassified	unclassified	5S ribosomal RNA	19	20	2946	205902	high
megahit_ABCN32_bin.13	MAG-0113	ABCN32	megahit	85.52	4.05	1436082	7719	d__Bacteria;p__Firmicutes_A;c__Clostridia;o__Oscillospirales;f__CAG	Bacteria	Firmicutes_A	Clostridia	Oscillospirales	CAG-272	CAG-448	unclassified	unclassified		12	214	2542	41565	medium
megahit_ABCN32_bin.17	MAG-0114	ABCN32	megahit	84.4	1.07	2457769	12399	d__Bacteria;p__Spirochaetota;c__GWE2	Bacteria	Spirochaetota	GWE2-31-10	GWE2-31-10	GWE2-31-10	unclassified	unclassified	unclassified	5S ribosomal RNA,23S ribosomal RNA (partial)	17	284	2509	49397	medium
megahit_ABCN32_bin.44	MAG-0115	ABCN32	megahit	88.23	1.12	1837260	41972	d__Bacteria;p__Firmicutes_A;c__Clostridia;o__Oscillospirales;f__CAG	Bacteria	Firmicutes_A	Clostridia	Oscillospirales	CAG-272	UBA1740	unclassified	unclassified		20	70	3956	87763	medium
megahit_ABCN33_bin.17	MAG-0116	ABCN33	megahit	83.01	1.31	1096189	9829	d__Archaea;p__Halobacterota;c__Methanomicrobia;o__Methanomicrobiales;f__Methanocorpusculaceae;g__Methanocorpusculum;	Archaea	Halobacterota	Methanomicrobia	Methanomicrobiales	Methanocorpusculaceae	Methanocorpusculum	unclassified	unclassified	5S ribosomal RNA,5S ribosomal RNA,23S ribosomal RNA,16S ribosomal RNA	20	137	2545	56079	medium
megahit_ABCN33_bin.22	MAG-0117	ABCN33	megahit	81.11	4.3	1720386	6720	d__Bacteria;p__Bacteroidota;c__Bacteroidia;o__Bacteroidales;f__Paludibacteraceae;	Bacteria	Bacteroidota	Bacteroidia	Bacteroidales	Paludibacteraceae	unclassified	unclassified	unclassified	5S ribosomal RNA	15	296	2501	39578	medium
megahit_ABCN4_bin.15	MAG-0118	ABCN4	megahit	83.75	7.57	2877973	12229	d__Bacteria;p__Verrucomicrobiota;c__Kiritimatiellae;o__RFP12;f__UBA1067;g__UBA1067;	Bacteria	Verrucomicrobiota	Kiritimatiellae	RFP12	UBA1067	UBA1067	unclassified	unclassified		20	321	2518	56568	low
megahit_ABCN4_bin.18	MAG-0119	ABCN4	megahit	84.48	0.65	1065020	9942	d__Archaea;p__Halobacterota;c__Methanomicrobia;o__Methanomicrobiales;f__Methanocorpusculaceae;g__Methanocorpusculum;	Archaea	Halobacterota	Methanomicrobia	Methanomicrobiales	Methanocorpusculaceae	Methanocorpusculum	unclassified	unclassified	5S ribosomal RNA,23S ribosomal RNA,16S ribosomal RNA	16	134	2558	35797	medium
megahit_ABCN4_bin.23	MAG-0120	ABCN4	megahit	86.36	0.86	1923045	7495	d__Bacteria;p__Firmicutes_A;c__Clostridia;o__Oscillospirales;f__CAG	Bacteria	Firmicutes_A	Clostridia	Oscillospirales	CAG-272	unclassified	unclassified	unclassified		14	297	2500	28825	medium
megahit_ABCN4_bin.24	MAG-0121	ABCN4	megahit	96.63	1.23	1686521	42045	d__Bacteria;p__Bacteroidota;c__Bacteroidia;o__Bacteroidales;f__Rikenellaceae;g__Alistipes;	Bacteria	Bacteroidota	Bacteroidia	Bacteroidales	Rikenellaceae	Alistipes	unclassified	unclassified	5S ribosomal RNA	20	72	2635	127515	high
megahit_ABCN4_bin.31	MAG-0122	ABCN4	megahit	93.26	0	1136171	7983	d__Bacteria;p__Elusimicrobiota;c__Elusimicrobia;o__Elusimicrobiales;f__Elusimicrobiaceae;	Bacteria	Elusimicrobiota	Elusimicrobia	Elusimicrobiales	Elusimicrobiaceae	unclassified	unclassified	unclassified	16S ribosomal RNA (partial),5S ribosomal RNA (partial),23S ribosomal RNA (partial)	19	163	2515	26294	high
megahit_ABCN4_bin.33	MAG-0123	ABCN4	megahit	97.04	0	3569977	34282	d__Bacteria;p__Bacteroidota;c__Bacteroidia;o__Bacteroidales;f__Paludibacteraceae;g__UBA1723;	Bacteria	Bacteroidota	Bacteroidia	Bacteroidales	Paludibacteraceae	UBA1723	unclassified	unclassified	5S ribosomal RNA (partial),5S ribosomal RNA (partial),5S ribosomal RNA	20	172	2549	126316	high
megahit_ABCN4_bin.41	MAG-0124	ABCN4	megahit	95.51	0	1299843	12582	d__Bacteria;p__Elusimicrobiota;c__Elusimicrobia;o__Elusimicrobiales;f__Elusimicrobiaceae;g__UBA1436;	Bacteria	Elusimicrobiota	Elusimicrobia	Elusimicrobiales	Elusimicrobiaceae	UBA1436	unclassified	unclassified	16S ribosomal RNA	20	139	2531	39851	high
megahit_ABCN5_bin.31	MAG-0125	ABCN5	megahit	99.3	3.62	2737383	20753	d__Bacteria;p__Spirochaetota;c__Spirochaetia;o__Treponematales;f__Treponemataceae;g__CETP13;	Bacteria	Spirochaetota	Spirochaetia	Treponematales	Treponemataceae	CETP13	unclassified	unclassified		20	214	2517	90196	high
megahit_ABCN5_bin.6	MAG-0126	ABCN5	megahit	84.46	3.64	1615673	6923	d__Bacteria;p__Firmicutes_A;c__Clostridia;o__Oscillospirales;f__CAG	Bacteria	Firmicutes_A	Clostridia	Oscillospirales	CAG-272	unclassified	unclassified	unclassified		13	261	2548	32150	medium
megahit_ABCN6_bin.20	MAG-0127	ABCN6	megahit	89.86	2.5	2342050	24907	d__Bacteria;p__Verrucomicrobiota;c__Lentisphaeria;o__Victivallales;f__Victivallaceae;g__UBA1784;	Bacteria	Verrucomicrobiota	Lentisphaeria	Victivallales	Victivallaceae	UBA1784	unclassified	unclassified		20	130	2655	104733	medium
megahit_ABCN6_bin.30	MAG-0128	ABCN6	megahit	84.51	0.34	1584673	12774	d__Bacteria;p__Firmicutes_A;c__Clostridia;o__Oscillospirales;f__Acutalibacteraceae;g__UBA737;	Bacteria	Firmicutes_A	Clostridia	Oscillospirales	Acutalibacteraceae	UBA737	unclassified	unclassified	5S ribosomal RNA	15	168	2560	46049	medium
megahit_ABCN6_bin.34	MAG-0129	ABCN6	megahit	85.24	3.14	1526342	8697	d__Bacteria;p__Bacteroidota;c__Bacteroidia;o__Bacteroidales;f__UBA932;	Bacteria	Bacteroidota	Bacteroidia	Bacteroidales	UBA932	unclassified	unclassified	unclassified		19	212	2500	28229	medium
megahit_ABCN6_bin.55	MAG-0130	ABCN6	megahit	90.27	1.2	1890269	43656	d__Bacteria;p__Bacteroidota;c__Bacteroidia;o__Bacteroidales;f__Rikenellaceae;g__Alistipes;	Bacteria	Bacteroidota	Bacteroidia	Bacteroidales	Rikenellaceae	Alistipes	unclassified	unclassified		19	61	2550	162460	high
megahit_ABCN6_bin.9	MAG-0131	ABCN6	megahit	95.97	1.56	2250255	78143	d__Bacteria;p__Bacteroidota;c__Bacteroidia;o__Bacteroidales;f__Paludibacteraceae;g__RF16;	Bacteria	Bacteroidota	Bacteroidia	Bacteroidales	Paludibacteraceae	RF16	unclassified	unclassified	5S ribosomal RNA,5S ribosomal RNA	19	54	2610	142682	high
megahit_ABCN7_bin.15	MAG-0132	ABCN7	megahit	97.54	3.06	2085502	34253	d__Bacteria;p__Firmicutes_A;c__Clostridia;o__Oscillospirales;f__CAG	Bacteria	Firmicutes_A	Clostridia	Oscillospirales	CAG-272	Firm-07	unclassified	unclassified		16	92	2983	115884	high
megahit_ABCN7_bin.25	MAG-0133	ABCN7	megahit	82.46	0.98	1104274	9085	d__Archaea;p__Halobacterota;c__Methanomicrobia;o__Methanomicrobiales;f__Methanocorpusculaceae;g__Methanocorpusculum;	Archaea	Halobacterota	Methanomicrobia	Methanomicrobiales	Methanocorpusculaceae	Methanocorpusculum	unclassified	unclassified	5S ribosomal RNA	18	138	2525	52181	medium
megahit_ABCN9_bin.10	MAG-0134	ABCN9	megahit	80.27	0.95	1469305	8173	d__Bacteria;p__Bacteroidota;c__Bacteroidia;o__Bacteroidales;f__UBA932;	Bacteria	Bacteroidota	Bacteroidia	Bacteroidales	UBA932	unclassified	unclassified	unclassified	23S ribosomal RNA (partial)	12	200	2546	43065	medium
megahit_ABCN9_bin.13	MAG-0135	ABCN9	megahit	80.53	1.68	1460655	18079	d__Bacteria;p__Bacteroidota;c__Bacteroidia;o__Bacteroidales;f__Rikenellaceae;g__Alistipes;	Bacteria	Bacteroidota	Bacteroidia	Bacteroidales	Rikenellaceae	Alistipes	unclassified	unclassified		16	100	2516	86995	medium
megahit_ABCN9_bin.14	MAG-0136	ABCN9	megahit	90.79	2.62	1678342	14648	d__Bacteria;p__Bacteroidota;c__Bacteroidia;o__Bacteroidales;f__UBA932;	Bacteria	Bacteroidota	Bacteroidia	Bacteroidales	UBA932	unclassified	unclassified	unclassified	5S ribosomal RNA (partial),5S ribosomal RNA (partial),5S ribosomal RNA (partial),5S ribosomal RNA	20	159	2566	73221	high
megahit_ABCN9_bin.35	MAG-0137	ABCN9	megahit	85.22	5.11	1883762	61152	d__Bacteria;p__Bacteroidota;c__Bacteroidia;o__Bacteroidales;f__Paludibacteraceae;g__RF16;	Bacteria	Bacteroidota	Bacteroidia	Bacteroidales	Paludibacteraceae	RF16	unclassified	unclassified	5S ribosomal RNA	19	53	2587	144602	medium
megahit_ABCN9_bin.40	MAG-0138	ABCN9	megahit	93.1	0.84	1815282	35856	d__Bacteria;p__Firmicutes_A;c__Clostridia;o__Oscillospirales;f__Acutalibacteraceae;	Bacteria	Firmicutes_A	Clostridia	Oscillospirales	Acutalibacteraceae	unclassified	unclassified	unclassified	5S ribosomal RNA,5S ribosomal RNA	20	76	2657	147696	high
megahit_ABDN1_bin.20	MAG-0139	ABDN1	megahit	95.51	3.93	2274051	20625	d__Bacteria;p__Firmicutes;c__Bacilli;o__RFN20;f__CAG	Bacteria	Firmicutes	Bacilli	RFN20	CAG-449	unclassified	unclassified	unclassified	16S ribosomal RNA,23S ribosomal RNA,5S ribosomal RNA (partial)	20	200	2504	70872	high
megahit_ABGD10_bin.24	MAG-0140	ABGD10	megahit	94.27	1.01	2090935	24115	d__Bacteria;p__Firmicutes_A;c__Clostridia;o__Oscillospirales;f__CAG	Bacteria	Firmicutes_A	Clostridia	Oscillospirales	CAG-272	unclassified	unclassified	unclassified	5S ribosomal RNA,5S ribosomal RNA,5S ribosomal RNA	20	132	2607	98060	high
megahit_ABGD10_bin.33	MAG-0141	ABGD10	megahit	86.93	9.38	1291719	15207	d__Bacteria;p__Firmicutes;c__Bacilli;o__RFN20;f__CAG	Bacteria	Firmicutes	Bacilli	RFN20	CAG-826	unclassified	unclassified	unclassified		19	127	2505	42308	low
megahit_ABGD11_bin.19	MAG-0142	ABGD11	megahit	92.44	2.42	2227552	20752	d__Bacteria;p__Bacteroidota;c__Bacteroidia;o__Bacteroidales;f__Paludibacteraceae;	Bacteria	Bacteroidota	Bacteroidia	Bacteroidales	Paludibacteraceae	unclassified	unclassified	unclassified	5S ribosomal RNA,5S ribosomal RNA,5S ribosomal RNA	19	144	2552	57672	high
megahit_ABGD11_bin.20	MAG-0143	ABGD11	megahit	91.12	3.54	2591181	44969	d__Bacteria;p__Verrucomicrobiota;c__Verrucomicrobiae;o__Verrucomicrobiales;f__Akkermansiaceae;g__Akkermansia;	Bacteria	Verrucomicrobiota	Verrucomicrobiae	Verrucomicrobiales	Akkermansiaceae	Akkermansia	unclassified	unclassified	5S ribosomal RNA,5S ribosomal RNA,5S ribosomal RNA,23S ribosomal RNA (partial)	20	90	2927	139870	high
megahit_ABGD11_bin.26	MAG-0144	ABGD11	megahit	80.97	1.67	2322222	45175	d__Bacteria;p__Bacteroidota;c__Bacteroidia;o__Bacteroidales;f__Bacteroidaceae;g__UBA4372;	Bacteria	Bacteroidota	Bacteroidia	Bacteroidales	Bacteroidaceae	UBA4372	unclassified	unclassified	16S ribosomal RNA (partial),5S ribosomal RNA,5S ribosomal RNA,5S ribosomal RNA	20	71	3165	160601	medium
megahit_ABGD11_bin.35	MAG-0145	ABGD11	megahit	88	5.34	2030806	38061	d__Bacteria;p__Bacteroidota;c__Bacteroidia;o__Bacteroidales;f__Rikenellaceae;g__Alistipes;	Bacteria	Bacteroidota	Bacteroidia	Bacteroidales	Rikenellaceae	Alistipes	unclassified	unclassified	5S ribosomal RNA	16	80	2658	97271	medium
megahit_ABGD11_bin.43	MAG-0146	ABGD11	megahit	91.22	0.74	2113142	46099	d__Bacteria;p__Verrucomicrobiota;c__Kiritimatiellae;o__RFP12;	Bacteria	Verrucomicrobiota	Kiritimatiellae	RFP12	unclassified	unclassified	unclassified	unclassified	5S ribosomal RNA	20	65	3059	97691	high
megahit_ABGD11_bin.45	MAG-0147	ABGD11	megahit	88.83	0.29	1545282	9785	d__Bacteria;p__Bacteroidota;c__Bacteroidia;o__Bacteroidales;f__Paludibacteraceae;g__RUG163;	Bacteria	Bacteroidota	Bacteroidia	Bacteroidales	Paludibacteraceae	RUG163	unclassified	unclassified	16S ribosomal RNA (partial),5S ribosomal RNA	18	191	2544	36668	medium
megahit_ABGD11_bin.53	MAG-0148	ABGD11	megahit	92.85	4.34	1751264	23961	d__Bacteria;p__Bacteroidota;c__Bacteroidia;o__Bacteroidales;f__Rikenellaceae;g__Alistipes;	Bacteria	Bacteroidota	Bacteroidia	Bacteroidales	Rikenellaceae	Alistipes	unclassified	unclassified	5S ribosomal RNA	14	107	2690	87257	high
megahit_ABGD11_bin.63	MAG-0149	ABGD11	megahit	83.23	7.41	2189056	10784	d__Bacteria;p__Bacteroidota;c__Bacteroidia;o__Bacteroidales;f__Bacteroidaceae;	Bacteria	Bacteroidota	Bacteroidia	Bacteroidales	Bacteroidaceae	unclassified	unclassified	unclassified	5S ribosomal RNA	17	249	2533	43232	low
megahit_ABGD11_bin.71	MAG-0150	ABGD11	megahit	85.16	0	2013421	32071	d__Bacteria;p__Proteobacteria;c__Gammaproteobacteria;o__Enterobacterales;f__Succinivibrionaceae;g__Succinivibrio;s__Succinivibrio	Bacteria	Proteobacteria	Gammaproteobacteria	Enterobacterales	Succinivibrionaceae	Succinivibrio	Succinivibrio sp003456415	unclassified	5S ribosomal RNA,5S ribosomal RNA	19	97	2715	203740	medium
megahit_ABGD11_bin.72	MAG-0151	ABGD11	megahit	98.12	1.84	1818787	68288	d__Bacteria;p__Bacteroidota;c__Bacteroidia;o__Bacteroidales;f__Rikenellaceae;g__Alistipes;	Bacteria	Bacteroidota	Bacteroidia	Bacteroidales	Rikenellaceae	Alistipes	unclassified	unclassified	5S ribosomal RNA,5S ribosomal RNA	20	41	3872	127132	high
megahit_ABGD11_bin.76	MAG-0152	ABGD11	megahit	94.63	0.34	2099059	65227	d__Bacteria;p__Firmicutes_A;c__Clostridia;o__Lachnospirales;f__Lachnospiraceae;g__CAG	Bacteria	Firmicutes_A	Clostridia	Lachnospirales	Lachnospiraceae	CAG-303	unclassified	unclassified		18	64	2531	192782	high
megahit_ABGD11_bin.9	MAG-0153	ABGD11	megahit	95.11	0.48	1875196	95378	d__Bacteria;p__Bacteroidota;c__Bacteroidia;o__Bacteroidales;f__Rikenellaceae;g__Alistipes;	Bacteria	Bacteroidota	Bacteroidia	Bacteroidales	Rikenellaceae	Alistipes	unclassified	unclassified	16S ribosomal RNA (partial),5S ribosomal RNA (partial),5S ribosomal RNA,5S ribosomal RNA (partial)	19	27	13735	177416	high
megahit_ABGD2_bin.12	MAG-0154	ABGD2	megahit	94.41	2.03	1487918	27148	d__Bacteria;p__Firmicutes_A;c__Clostridia;o__Oscillospirales;f__Acutalibacteraceae;	Bacteria	Firmicutes_A	Clostridia	Oscillospirales	Acutalibacteraceae	unclassified	unclassified	unclassified	5S ribosomal RNA	20	92	2566	81487	high
megahit_ABGD2_bin.22	MAG-0155	ABGD2	megahit	93.85	0.44	1728421	45652	d__Bacteria;p__Firmicutes_A;c__Clostridia;o__Oscillospirales;f__CAG	Bacteria	Firmicutes_A	Clostridia	Oscillospirales	CAG-272	UBA1740	unclassified	unclassified		20	54	3038	109668	high
megahit_ABGD2_bin.38	MAG-0156	ABGD2	megahit	91.89	0.67	2103981	13259	d__Bacteria;p__Firmicutes_A;c__Clostridia;o__Oscillospirales;f__CAG	Bacteria	Firmicutes_A	Clostridia	Oscillospirales	CAG-272	unclassified	unclassified	unclassified	5S ribosomal RNA (partial),5S ribosomal RNA (partial)	17	223	2521	56118	high
megahit_ABGD2_bin.4	MAG-0157	ABGD2	megahit	96.5	2.56	2256433	28990	d__Bacteria;p__Spirochaetota;c__Spirochaetia;o__Treponematales;f__Treponemataceae;g__Treponema_D;	Bacteria	Spirochaetota	Spirochaetia	Treponematales	Treponemataceae	Treponema_D	unclassified	unclassified	5S ribosomal RNA,5S ribosomal RNA	20	155	2531	72764	high
megahit_ABGD2_bin.40	MAG-0158	ABGD2	megahit	82.37	1.53	1813982	6812	d__Bacteria;p__Firmicutes_A;c__Clostridia;o__Oscillospirales;f__CAG	Bacteria	Firmicutes_A	Clostridia	Oscillospirales	CAG-272	unclassified	unclassified	unclassified		11	307	2500	23625	medium
megahit_ABGD2_bin.47	MAG-0159	ABGD2	megahit	87.06	0.87	2206831	10431	d__Bacteria;p__Spirochaetota;c__Spirochaetia;o__Treponematales;f__Treponemataceae;g__Treponema_D;	Bacteria	Spirochaetota	Spirochaetia	Treponematales	Treponemataceae	Treponema_D	unclassified	unclassified		13	274	2520	33942	medium
megahit_ABGD2_bin.50	MAG-0160	ABGD2	megahit	90.41	3.37	1792605	17597	d__Bacteria;p__Bacteroidota;c__Bacteroidia;o__Bacteroidales;f__Rikenellaceae;g__Alistipes;	Bacteria	Bacteroidota	Bacteroidia	Bacteroidales	Rikenellaceae	Alistipes	unclassified	unclassified	5S ribosomal RNA	17	120	2998	61708	high
megahit_ABGD2_bin.51	MAG-0161	ABGD2	megahit	86.59	0.67	1615223	7046	d__Bacteria;p__Firmicutes_A;c__Clostridia;o__Oscillospirales;f__Oscillospiraceae;g__CAG	Bacteria	Firmicutes_A	Clostridia	Oscillospirales	Oscillospiraceae	CAG-110	unclassified	unclassified		12	253	2515	31003	medium
megahit_ABGD2_bin.62	MAG-0162	ABGD2	megahit	92.84	0.16	2194785	46620	d__Bacteria;p__Firmicutes_A;c__Clostridia;o__Oscillospirales;f__CAG	Bacteria	Firmicutes_A	Clostridia	Oscillospirales	CAG-272	UBA1740	unclassified	unclassified		19	83	2784	149939	high
megahit_ABGD2_bin.78	MAG-0163	ABGD2	megahit	97.58	0	1728384	72896	d__Bacteria;p__Bacteroidota;c__Bacteroidia;o__Bacteroidales;f__Paludibacteraceae;g__RUG163;	Bacteria	Bacteroidota	Bacteroidia	Bacteroidales	Paludibacteraceae	RUG163	unclassified	unclassified	5S ribosomal RNA (partial),5S ribosomal RNA (partial),16S ribosomal RNA (partial),5S ribosomal RNA	20	37	3243	141676	high
megahit_ABGD2_bin.83	MAG-0164	ABGD2	megahit	89.65	0.81	1366743	37172	d__Bacteria;p__Firmicutes_A;c__Clostridia;o__4C28d	Bacteria	Firmicutes_A	Clostridia	4C28d-15	CAG-727	QALS01	unclassified	unclassified	5S ribosomal RNA,5S ribosomal RNA	20	72	2524	83296	medium
megahit_ABGD2_bin.85	MAG-0165	ABGD2	megahit	89.24	2.4	1716961	33006	d__Bacteria;p__Bacteroidota;c__Bacteroidia;o__Bacteroidales;f__Rikenellaceae;g__Alistipes;	Bacteria	Bacteroidota	Bacteroidia	Bacteroidales	Rikenellaceae	Alistipes	unclassified	unclassified	5S ribosomal RNA,5S ribosomal RNA,5S ribosomal RNA	19	77	2633	85550	medium
megahit_ABGD2_bin.86	MAG-0166	ABGD2	megahit	80.99	4.95	1480544	7736	d__Bacteria;p__Proteobacteria;c__Alphaproteobacteria;o__RF32;f__UBA3637;	Bacteria	Proteobacteria	Alphaproteobacteria	RF32	UBA3637	unclassified	unclassified	unclassified		16	215	2590	26403	medium
megahit_ABGD3_bin.35	MAG-0167	ABGD3	megahit	99.46	0	3648649	98954	d__Bacteria;p__Bacteroidota;c__Bacteroidia;o__Bacteroidales;f__Paludibacteraceae;g__UBA1723;	Bacteria	Bacteroidota	Bacteroidia	Bacteroidales	Paludibacteraceae	UBA1723	unclassified	unclassified	5S ribosomal RNA (partial),5S ribosomal RNA,5S ribosomal RNA (partial),5S ribosomal RNA (partial)	20	55	2813	311264	high
megahit_ABGD3_bin.37	MAG-0168	ABGD3	megahit	85.15	2.86	2281730	27710	d__Bacteria;p__Verrucomicrobiota;c__Verrucomicrobiae;o__Verrucomicrobiales;f__Akkermansiaceae;g__Akkermansia;	Bacteria	Verrucomicrobiota	Verrucomicrobiae	Verrucomicrobiales	Akkermansiaceae	Akkermansia	unclassified	unclassified		20	137	2619	96394	medium
megahit_ABGD3_bin.44	MAG-0169	ABGD3	megahit	81.21	0	1939357	32692	d__Bacteria;p__Bacteroidota;c__Bacteroidia;o__Bacteroidales;f__Rikenellaceae;g__Alistipes;	Bacteria	Bacteroidota	Bacteroidia	Bacteroidales	Rikenellaceae	Alistipes	unclassified	unclassified		19	89	2755	97058	medium
megahit_ABGD3_bin.50	MAG-0170	ABGD3	megahit	88.23	0.54	2078850	42602	d__Bacteria;p__Bacteroidota;c__Bacteroidia;o__Bacteroidales;f__WCHB1	Bacteria	Bacteroidota	Bacteroidia	Bacteroidales	WCHB1-69	UBA5429	unclassified	unclassified	23S ribosomal RNA (partial),5S ribosomal RNA	19	72	2618	98752	medium
megahit_ABGD3_bin.6	MAG-0171	ABGD3	megahit	88.24	9.86	2069374	10513	d__Bacteria;p__Firmicutes_A;c__Clostridia;o__Oscillospirales;f__CAG	Bacteria	Firmicutes_A	Clostridia	Oscillospirales	CAG-272	Firm-07	unclassified	unclassified		13	269	2504	48146	low
megahit_ABGD4_bin.10	MAG-0172	ABGD4	megahit	85.13	0.65	1104940	9552	d__Archaea;p__Halobacterota;c__Methanomicrobia;o__Methanomicrobiales;f__Methanocorpusculaceae;g__Methanocorpusculum;	Archaea	Halobacterota	Methanomicrobia	Methanomicrobiales	Methanocorpusculaceae	Methanocorpusculum	unclassified	unclassified	5S ribosomal RNA	18	132	2503	42900	medium
megahit_ABGD4_bin.21	MAG-0173	ABGD4	megahit	92.3	0.71	2635387	41828	d__Bacteria;p__Bacteroidota;c__Bacteroidia;o__Bacteroidales;f__UBA932;g__RC9;	Bacteria	Bacteroidota	Bacteroidia	Bacteroidales	UBA932	RC9	unclassified	unclassified	5S ribosomal RNA,5S ribosomal RNA	17	116	2516	103682	high
megahit_ABGD4_bin.30	MAG-0174	ABGD4	megahit	81.74	2.03	1415496	15226	d__Bacteria;p__Firmicutes_A;c__Clostridia;o__Oscillospirales;f__CAG	Bacteria	Firmicutes_A	Clostridia	Oscillospirales	CAG-272	unclassified	unclassified	unclassified	5S ribosomal RNA	17	129	2582	43274	medium
megahit_ABGD4_bin.34	MAG-0175	ABGD4	megahit	85.9	3.12	1528276	10259	d__Bacteria;p__Bacteroidota;c__Bacteroidia;o__Bacteroidales;f__Rikenellaceae;	Bacteria	Bacteroidota	Bacteroidia	Bacteroidales	Rikenellaceae	unclassified	unclassified	unclassified	16S ribosomal RNA (partial)	14	186	2505	53269	medium
megahit_ABGD4_bin.58	MAG-0176	ABGD4	megahit	86.1	0.73	1902096	10806	d__Bacteria;p__Firmicutes_A;c__Clostridia;o__Oscillospirales;f__CAG	Bacteria	Firmicutes_A	Clostridia	Oscillospirales	CAG-272	QALR01	unclassified	unclassified		16	218	2581	53806	medium
megahit_ABGD5_bin.16	MAG-0177	ABGD5	megahit	81.56	0.36	2342772	10797	d__Bacteria;p__Verrucomicrobiota;c__Verrucomicrobiae;o__Verrucomicrobiales;f__Akkermansiaceae;g__Akkermansia;	Bacteria	Verrucomicrobiota	Verrucomicrobiae	Verrucomicrobiales	Akkermansiaceae	Akkermansia	unclassified	unclassified		20	266	2535	40016	medium
megahit_ABGD6_bin.1	MAG-0178	ABGD6	megahit	82.34	3.02	2415731	9588	d__Bacteria;p__Firmicutes_A;c__Clostridia;o__Oscillospirales;f__CAG	Bacteria	Firmicutes_A	Clostridia	Oscillospirales	CAG-272	CAG-448	unclassified	unclassified	5S ribosomal RNA,5S ribosomal RNA	18	310	2519	32150	medium
megahit_ABGD6_bin.10	MAG-0179	ABGD6	megahit	84.15	0	1086973	11808	d__Archaea;p__Halobacterota;c__Methanomicrobia;o__Methanomicrobiales;f__Methanocorpusculaceae;g__Methanocorpusculum;	Archaea	Halobacterota	Methanomicrobia	Methanomicrobiales	Methanocorpusculaceae	Methanocorpusculum	unclassified	unclassified	5S ribosomal RNA	20	120	2506	37648	medium
megahit_ABGD6_bin.16	MAG-0180	ABGD6	megahit	83.92	3.46	2062625	8830	d__Bacteria;p__Spirochaetota;c__Spirochaetia;o__Treponematales;f__Treponemataceae;	Bacteria	Spirochaetota	Spirochaetia	Treponematales	Treponemataceae	unclassified	unclassified	unclassified	5S ribosomal RNA	17	277	2516	46835	medium
megahit_ABGD7_bin.5	MAG-0181	ABGD7	megahit	84.82	2.06	1751873	9356	d__Bacteria;p__Firmicutes_A;c__Clostridia;o__Oscillospirales;f__CAG	Bacteria	Firmicutes_A	Clostridia	Oscillospirales	CAG-272	UBA1740	unclassified	unclassified		16	242	2512	23549	medium
megahit_ABGD8_bin.13	MAG-0182	ABGD8	megahit	80.67	7.53	2076651	6700	d__Bacteria;p__Verrucomicrobiota;c__Lentisphaeria;o__Victivallales;f__UBA1829;	Bacteria	Verrucomicrobiota	Lentisphaeria	Victivallales	UBA1829	unclassified	unclassified	unclassified		20	355	2503	28533	low
megahit_ABGD8_bin.14	MAG-0183	ABGD8	megahit	90.04	3.27	2305090	14718	d__Bacteria;p__Firmicutes_A;c__Clostridia;o__Oscillospirales;f__CAG	Bacteria	Firmicutes_A	Clostridia	Oscillospirales	CAG-272	UBA1740	unclassified	unclassified		20	211	2590	43156	high
megahit_ABGD8_bin.20	MAG-0184	ABGD8	megahit	81.84	1.31	1097686	11092	d__Archaea;p__Halobacterota;c__Methanomicrobia;o__Methanomicrobiales;f__Methanocorpusculaceae;g__Methanocorpusculum;	Archaea	Halobacterota	Methanomicrobia	Methanomicrobiales	Methanocorpusculaceae	Methanocorpusculum	unclassified	unclassified		20	133	2571	29287	medium
megahit_ABGD8_bin.27	MAG-0185	ABGD8	megahit	85.11	3.27	2624515	14667	d__Bacteria;p__Verrucomicrobiota;c__Kiritimatiellae;o__RFP12;f__UBA1067;g__UBA1067;	Bacteria	Verrucomicrobiota	Kiritimatiellae	RFP12	UBA1067	UBA1067	unclassified	unclassified	5S ribosomal RNA,5S ribosomal RNA	20	253	2524	52575	medium
megahit_ABGD8_bin.46	MAG-0186	ABGD8	megahit	82.44	5.05	1756002	7589	d__Bacteria;p__Bacteroidota;c__Bacteroidia;o__Bacteroidales;f__Rikenellaceae;g__Alistipes;	Bacteria	Bacteroidota	Bacteroidia	Bacteroidales	Rikenellaceae	Alistipes	unclassified	unclassified	5S ribosomal RNA	14	265	2530	24611	medium
megahit_ABGD8_bin.9	MAG-0187	ABGD8	megahit	89.02	3.38	3456789	12567	d__Bacteria;p__Verrucomicrobiota;c__Lentisphaeria;o__Victivallales;f__UBA1829;	Bacteria	Verrucomicrobiota	Lentisphaeria	Victivallales	UBA1829	unclassified	unclassified	unclassified		18	379	2519	52104	medium
megahit_ABGD9_bin.2	MAG-0188	ABGD9	megahit	92.93	3.38	2143105	13935	d__Bacteria;p__Bacteroidota;c__Bacteroidia;o__Bacteroidales;f__Rikenellaceae;g__Alistipes;	Bacteria	Bacteroidota	Bacteroidia	Bacteroidales	Rikenellaceae	Alistipes	unclassified	unclassified	16S ribosomal RNA (partial)	20	216	2546	47176	high
megahit_ABGD9_bin.22	MAG-0189	ABGD9	megahit	91.59	0.88	2307312	52958	d__Bacteria;p__Bacteroidota;c__Bacteroidia;o__Bacteroidales;f__Bacteroidaceae;g__Prevotellamassilia;	Bacteria	Bacteroidota	Bacteroidia	Bacteroidales	Bacteroidaceae	Prevotellamassilia	unclassified	unclassified	5S ribosomal RNA,5S ribosomal RNA,5S ribosomal RNA,5S ribosomal RNA,16S ribosomal RNA (partial)	19	65	3746	207872	high
megahit_ABGD9_bin.27	MAG-0190	ABGD9	megahit	92.81	0.55	1714562	11282	d__Bacteria;p__Firmicutes_A;c__Clostridia;o__Oscillospirales;f__CAG	Bacteria	Firmicutes_A	Clostridia	Oscillospirales	CAG-272	unclassified	unclassified	unclassified	5S ribosomal RNA,5S ribosomal RNA	17	202	2517	33204	high
megahit_ABGD9_bin.28	MAG-0191	ABGD9	megahit	85.25	3.97	2210976	14833	d__Bacteria;p__Verrucomicrobiota;c__Verrucomicrobiae;o__Verrucomicrobiales;f__Akkermansiaceae;g__Akkermansia;	Bacteria	Verrucomicrobiota	Verrucomicrobiae	Verrucomicrobiales	Akkermansiaceae	Akkermansia	unclassified	unclassified		19	196	2535	66378	medium
megahit_BLJ1_bin.1	MAG-0192	BLJ1	megahit	92.96	2.71	1876801	60181	d__Bacteria;p__Bacteroidota;c__Bacteroidia;o__Bacteroidales;f__Paludibacteraceae;g__RF16;	Bacteria	Bacteroidota	Bacteroidia	Bacteroidales	Paludibacteraceae	RF16	unclassified	unclassified	23S ribosomal RNA (partial),5S ribosomal RNA,5S ribosomal RNA (partial)	20	49	2969	169595	high
megahit_BLJ1_bin.27	MAG-0193	BLJ1	megahit	88.63	2.24	1810020	32684	d__Bacteria;p__Firmicutes_A;c__Clostridia;o__4C28d	Bacteria	Firmicutes_A	Clostridia	4C28d-15	CAG-727	QALS01	unclassified	unclassified	5S ribosomal RNA (partial)	19	79	2643	150744	medium
megahit_BLJ1_bin.29	MAG-0194	BLJ1	megahit	82.85	4.94	2089436	8317	d__Bacteria;p__Firmicutes_A;c__Clostridia;o__Oscillospirales;f__CAG	Bacteria	Firmicutes_A	Clostridia	Oscillospirales	CAG-272	Firm-07	unclassified	unclassified		11	313	2500	25678	medium
megahit_BLJ1_bin.30	MAG-0195	BLJ1	megahit	93.44	2.03	1890495	19061	d__Bacteria;p__Firmicutes_A;c__Clostridia;o__Oscillospirales;f__CAG	Bacteria	Firmicutes_A	Clostridia	Oscillospirales	CAG-272	Firm-07	unclassified	unclassified		17	142	2554	83126	high
megahit_BLJ1_bin.51	MAG-0196	BLJ1	megahit	81.7	2.37	1647733	44149	d__Bacteria;p__Firmicutes_A;c__Clostridia;o__Oscillospirales;f__CAG	Bacteria	Firmicutes_A	Clostridia	Oscillospirales	CAG-272	UBA1740	unclassified	unclassified		20	45	3249	124185	medium
megahit_BLJ1_bin.60	MAG-0197	BLJ1	megahit	81.7	4.14	1123912	6902	d__Archaea;p__Halobacterota;c__Methanomicrobia;o__Methanomicrobiales;f__Methanocorpusculaceae;g__Methanocorpusculum;	Archaea	Halobacterota	Methanomicrobia	Methanomicrobiales	Methanocorpusculaceae	Methanocorpusculum	unclassified	unclassified	5S ribosomal RNA	18	179	2507	26169	medium
megahit_BLJ1_bin.62	MAG-0198	BLJ1	megahit	89.35	0.6	1161697	11639	d__Bacteria;p__Firmicutes_A;c__Clostridia;o__4C28d	Bacteria	Firmicutes_A	Clostridia	4C28d-15	CAG-727	unclassified	unclassified	unclassified	5S ribosomal RNA,5S ribosomal RNA	18	130	2506	48330	medium
megahit_BLJ1_bin.67	MAG-0199	BLJ1	megahit	84.43	1.38	1948673	40050	d__Bacteria;p__Verrucomicrobiota;c__Kiritimatiellae;o__RFP12;f__UBA1067;g__UBA1067;	Bacteria	Verrucomicrobiota	Kiritimatiellae	RFP12	UBA1067	UBA1067	unclassified	unclassified	5S ribosomal RNA,5S ribosomal RNA,5S ribosomal RNA	20	94	2631	119852	medium
megahit_BLJ1_bin.73	MAG-0200	BLJ1	megahit	81.99	0.81	1904251	13342	d__Bacteria;p__Firmicutes_A;c__Clostridia;o__4C28d	Bacteria	Firmicutes_A	Clostridia	4C28d-15	CAG-727	UBA10281	unclassified	unclassified	5S ribosomal RNA	15	190	2578	38384	medium
megahit_BLJ1_bin.77	MAG-0201	BLJ1	megahit	89.11	3.39	2153229	25919	d__Bacteria;p__Bacteroidota;c__Bacteroidia;o__Bacteroidales;f__Bacteroidaceae;	Bacteria	Bacteroidota	Bacteroidia	Bacteroidales	Bacteroidaceae	unclassified	unclassified	unclassified	16S ribosomal RNA (partial),5S ribosomal RNA,5S ribosomal RNA,5S ribosomal RNA,5S ribosomal RNA	20	135	2556	96086	medium
megahit_BLJ10_bin.42	MAG-0202	BLJ10	megahit	89.12	3.02	1702535	21787	d__Bacteria;p__Firmicutes_A;c__Clostridia;o__Oscillospirales;f__CAG	Bacteria	Firmicutes_A	Clostridia	Oscillospirales	CAG-272	unclassified	unclassified	unclassified	5S ribosomal RNA,5S ribosomal RNA,5S ribosomal RNA (partial)	20	124	2573	57104	medium
megahit_BLJ10_bin.44	MAG-0203	BLJ10	megahit	90.04	7.35	3170790	13224	d__Bacteria;p__Firmicutes_A;c__Clostridia;o__Lachnospirales;f__Lachnospiraceae;g__CAG	Bacteria	Firmicutes_A	Clostridia	Lachnospirales	Lachnospiraceae	CAG-303	unclassified	unclassified		20	317	2521	89542	medium
megahit_BLJ10_bin.52	MAG-0204	BLJ10	megahit	92.19	0.34	2109072	23491	d__Bacteria;p__Firmicutes_A;c__Clostridia;o__Oscillospirales;f__CAG	Bacteria	Firmicutes_A	Clostridia	Oscillospirales	CAG-272	UBA1740	unclassified	unclassified		20	125	2577	159615	high
megahit_BLJ10_bin.53	MAG-0205	BLJ10	megahit	87.82	6.07	2285803	34970	d__Bacteria;p__Bacteroidota;c__Bacteroidia;o__Bacteroidales;f__Bacteroidaceae;	Bacteria	Bacteroidota	Bacteroidia	Bacteroidales	Bacteroidaceae	unclassified	unclassified	unclassified	5S ribosomal RNA,5S ribosomal RNA (partial)	20	111	2645	104992	medium
megahit_BLJ10_bin.64	MAG-0206	BLJ10	megahit	97.9	1.86	2151891	23222	d__Bacteria;p__Spirochaetota;c__Spirochaetia;o__Treponematales;f__Treponemataceae;	Bacteria	Spirochaetota	Spirochaetia	Treponematales	Treponemataceae	unclassified	unclassified	unclassified		20	129	2502	108294	high
megahit_BLJ11_bin.32	MAG-0207	BLJ11	megahit	91.21	3.97	1862886	14087	d__Bacteria;p__Bacteroidota;c__Bacteroidia;o__Bacteroidales;f__Rikenellaceae;g__Alistipes;	Bacteria	Bacteroidota	Bacteroidia	Bacteroidales	Rikenellaceae	Alistipes	unclassified	unclassified	5S ribosomal RNA	18	205	2523	35302	high
megahit_BLJ11_bin.37	MAG-0208	BLJ11	megahit	97.2	0	2300616	55001	d__Bacteria;p__Spirochaetota;c__Spirochaetia;o__Treponematales;f__Treponemataceae;g__Treponema_D;	Bacteria	Spirochaetota	Spirochaetia	Treponematales	Treponemataceae	Treponema_D	unclassified	unclassified	5S ribosomal RNA,5S ribosomal RNA,5S ribosomal RNA	20	84	2562	168723	high
megahit_BLJ11_bin.39	MAG-0209	BLJ11	megahit	93.41	3.77	2015447	13668	d__Bacteria;p__Bacteroidota;c__Bacteroidia;o__Bacteroidales;f__Rikenellaceae;g__Alistipes;	Bacteria	Bacteroidota	Bacteroidia	Bacteroidales	Rikenellaceae	Alistipes	unclassified	unclassified	16S ribosomal RNA (partial),5S ribosomal RNA	19	194	2523	56340	high
megahit_BLJ11_bin.42	MAG-0210	BLJ11	megahit	89.24	0.98	1762839	16815	d__Bacteria;p__Bacteroidota;c__Bacteroidia;o__Bacteroidales;f__Rikenellaceae;g__Alistipes;	Bacteria	Bacteroidota	Bacteroidia	Bacteroidales	Rikenellaceae	Alistipes	unclassified	unclassified		16	146	2544	62304	medium
megahit_BLJ11_bin.53	MAG-0211	BLJ11	megahit	92.62	3.86	2425335	18650	d__Bacteria;p__Firmicutes_A;c__Clostridia;o__Lachnospirales;f__Lachnospiraceae;g__CAG	Bacteria	Firmicutes_A	Clostridia	Lachnospirales	Lachnospiraceae	CAG-303	unclassified	unclassified		20	187	2545	102600	high
megahit_BLJ12_bin.24	MAG-0212	BLJ12	megahit	88.6	2.82	2025713	11223	d__Bacteria;p__Firmicutes_A;c__Clostridia;o__Oscillospirales;f__CAG	Bacteria	Firmicutes_A	Clostridia	Oscillospirales	CAG-272	UBA1740	unclassified	unclassified	16S ribosomal RNA (partial)	18	240	2569	52125	medium
megahit_BLJ12_bin.26	MAG-0213	BLJ12	megahit	88.77	2.46	1779657	10412	d__Bacteria;p__Firmicutes_A;c__Clostridia;o__Lachnospirales;f__Lachnospiraceae;g__Butyrivibrio_A;	Bacteria	Firmicutes_A	Clostridia	Lachnospirales	Lachnospiraceae	Butyrivibrio_A	unclassified	unclassified		13	224	2505	41770	medium
megahit_BLJ12_bin.3	MAG-0214	BLJ12	megahit	96.93	0.62	1780183	34503	d__Bacteria;p__Firmicutes_A;c__Clostridia;o__Oscillospirales;f__Oscillospiraceae;g__CAG	Bacteria	Firmicutes_A	Clostridia	Oscillospirales	Oscillospiraceae	CAG-110	unclassified	unclassified	5S ribosomal RNA (partial),5S ribosomal RNA	19	86	2753	77118	high
megahit_BLJ12_bin.36	MAG-0215	BLJ12	megahit	90.53	0.84	1953709	15212	d__Bacteria;p__Firmicutes_A;c__Clostridia;o__Oscillospirales;f__CAG	Bacteria	Firmicutes_A	Clostridia	Oscillospirales	CAG-272	Firm-07	unclassified	unclassified		16	161	2529	50123	high
megahit_BLJ12_bin.37	MAG-0216	BLJ12	megahit	94.15	3.06	2153211	41180	d__Bacteria;p__Bacteroidota;c__Bacteroidia;o__Bacteroidales;f__Rikenellaceae;g__Alistipes;	Bacteria	Bacteroidota	Bacteroidia	Bacteroidales	Rikenellaceae	Alistipes	unclassified	unclassified	16S ribosomal RNA (partial),5S ribosomal RNA,5S ribosomal RNA	19	74	2844	126164	high
megahit_BLJ12_bin.40	MAG-0217	BLJ12	megahit	88.32	1.89	2729783	17708	d__Bacteria;p__Firmicutes_A;c__Clostridia;o__Oscillospirales;f__CAG	Bacteria	Firmicutes_A	Clostridia	Oscillospirales	CAG-272	QALR01	unclassified	unclassified	5S ribosomal RNA,16S ribosomal RNA (partial)	15	259	2505	105994	medium
megahit_BLJ13_bin.10	MAG-0218	BLJ13	megahit	96.8	0	2917381	49409	d__Bacteria;p__Spirochaetota;c__GWE2	Bacteria	Spirochaetota	GWE2-31-10	GWE2-31-10	GWE2-31-10	unclassified	unclassified	unclassified	5S ribosomal RNA,5S ribosomal RNA,5S ribosomal RNA,5S ribosomal RNA,23S ribosomal RNA (partial)	20	90	3055	193296	high
megahit_BLJ13_bin.27	MAG-0219	BLJ13	megahit	90.35	1.14	1865152	20037	d__Bacteria;p__Firmicutes_A;c__Clostridia;o__Oscillospirales;f__CAG	Bacteria	Firmicutes_A	Clostridia	Oscillospirales	CAG-272	unclassified	unclassified	unclassified	5S ribosomal RNA,5S ribosomal RNA	16	147	2500	74636	high
megahit_BLJ13_bin.32	MAG-0220	BLJ13	megahit	87.46	7.45	2034492	8214	d__Bacteria;p__Firmicutes_A;c__Clostridia;o__Oscillospirales;f__CAG	Bacteria	Firmicutes_A	Clostridia	Oscillospirales	CAG-272	unclassified	unclassified	unclassified	5S ribosomal RNA,5S ribosomal RNA	19	293	2512	36288	medium
megahit_BLJ13_bin.4	MAG-0221	BLJ13	megahit	89.08	2.91	1884236	16188	d__Bacteria;p__Bacteroidota;c__Bacteroidia;o__Bacteroidales;f__Bacteroidaceae;	Bacteria	Bacteroidota	Bacteroidia	Bacteroidales	Bacteroidaceae	unclassified	unclassified	unclassified		19	162	2506	41640	medium
megahit_BLJ13_bin.6	MAG-0222	BLJ13	megahit	89.43	2.68	2692882	11933	d__Bacteria;p__Firmicutes_A;c__Clostridia;o__Oscillospirales;f__CAG	Bacteria	Firmicutes_A	Clostridia	Oscillospirales	CAG-272	unclassified	unclassified	unclassified	5S ribosomal RNA (partial)	18	323	2502	48445	medium
megahit_BLJ13_bin.9	MAG-0223	BLJ13	megahit	96.99	2.88	1839677	49075	d__Bacteria;p__Bacteroidota;c__Bacteroidia;o__Bacteroidales;f__Rikenellaceae;g__Alistipes;	Bacteria	Bacteroidota	Bacteroidia	Bacteroidales	Rikenellaceae	Alistipes	unclassified	unclassified	5S ribosomal RNA	20	67	2577	130691	high
megahit_BLJ14_bin.14	MAG-0224	BLJ14	megahit	82.03	2.73	2265185	32398	d__Bacteria;p__Verrucomicrobiota;c__Kiritimatiellae;o__RFP12;f__UBA1067;g__UBA1067;	Bacteria	Verrucomicrobiota	Kiritimatiellae	RFP12	UBA1067	UBA1067	unclassified	unclassified	16S ribosomal RNA (partial),5S ribosomal RNA,5S ribosomal RNA,5S ribosomal RNA	20	102	3038	112801	medium
megahit_BLJ14_bin.19	MAG-0225	BLJ14	megahit	92.63	7.4	1985360	27096	d__Bacteria;p__Firmicutes_A;c__Clostridia;o__Oscillospirales;f__Oscillospiraceae;g__CAG	Bacteria	Firmicutes_A	Clostridia	Oscillospirales	Oscillospiraceae	CAG-110	unclassified	unclassified	5S ribosomal RNA (partial),5S ribosomal RNA (partial)	19	111	2529	85081	medium
megahit_BLJ14_bin.23	MAG-0226	BLJ14	megahit	86.07	0.67	1699808	44043	d__Bacteria;p__Firmicutes_A;c__Clostridia;o__Oscillospirales;f__Oscillospiraceae;g__CAG	Bacteria	Firmicutes_A	Clostridia	Oscillospirales	Oscillospiraceae	CAG-110	unclassified	unclassified	16S ribosomal RNA (partial)	19	61	3378	110590	medium
megahit_BLJ14_bin.40	MAG-0227	BLJ14	megahit	95.45	0	1547413	66419	d__Bacteria;p__Firmicutes_A;c__Clostridia;o__4C28d	Bacteria	Firmicutes_A	Clostridia	4C28d-15	CAG-727	QALS01	unclassified	unclassified	5S ribosomal RNA,5S ribosomal RNA (partial)	20	43	3531	134060	high
megahit_BLJ14_bin.53	MAG-0228	BLJ14	megahit	94.35	0.6	1270801	17822	d__Bacteria;p__Firmicutes_A;c__Clostridia;o__4C28d	Bacteria	Firmicutes_A	Clostridia	4C28d-15	CAG-727	QALS01	unclassified	unclassified	5S ribosomal RNA,5S ribosomal RNA	15	100	2634	46632	high
megahit_BLJ14_bin.54	MAG-0229	BLJ14	megahit	80.93	0.05	2086636	6338	d__Bacteria;p__Spirochaetota;c__GWE2	Bacteria	Spirochaetota	GWE2-31-10	GWE2-31-10	GWE2-31-10	unclassified	unclassified	unclassified	5S ribosomal RNA (partial),5S ribosomal RNA (partial)	17	375	2507	21622	medium
megahit_BLJ14_bin.6	MAG-0230	BLJ14	megahit	80.92	4.83	1574457	8954	d__Bacteria;p__Firmicutes_A;c__Clostridia;o__Oscillospirales;f__CAG	Bacteria	Firmicutes_A	Clostridia	Oscillospirales	CAG-272	unclassified	unclassified	unclassified	5S ribosomal RNA,5S ribosomal RNA	19	214	2510	34944	medium
megahit_BLJ14_bin.66	MAG-0231	BLJ14	megahit	81.19	4.6	2329298	6229	d__Bacteria;p__Verrucomicrobiota;c__Lentisphaeria;o__Victivallales;f__Victivallaceae;g__UBA1784;	Bacteria	Verrucomicrobiota	Lentisphaeria	Victivallales	Victivallaceae	UBA1784	unclassified	unclassified	5S ribosomal RNA	18	415	2500	31834	medium
megahit_BLJ14_bin.8	MAG-0232	BLJ14	megahit	82.15	1.38	1618917	10511	d__Bacteria;p__Verrucomicrobiota;c__Kiritimatiellae;o__RFP12;	Bacteria	Verrucomicrobiota	Kiritimatiellae	RFP12	unclassified	unclassified	unclassified	unclassified		20	207	2520	26445	medium
megahit_BLJ16_bin.12	MAG-0233	BLJ16	megahit	85.89	1.68	1551461	29614	d__Bacteria;p__Firmicutes_A;c__Clostridia;o__Oscillospirales;f__CAG	Bacteria	Firmicutes_A	Clostridia	Oscillospirales	CAG-272	UBA1740	unclassified	unclassified		18	76	2707	76521	medium
megahit_BLJ16_bin.19	MAG-0234	BLJ16	megahit	94.07	3.88	3262390	19399	d__Bacteria;p__Firmicutes_A;c__Clostridia;o__Lachnospirales;f__Lachnospiraceae;g__Acetatifactor;	Bacteria	Firmicutes_A	Clostridia	Lachnospirales	Lachnospiraceae	Acetatifactor	unclassified	unclassified		17	253	2526	76732	high
megahit_BLJ17_bin.18	MAG-0235	BLJ17	megahit	92.78	8.04	2402808	12435	d__Bacteria;p__Firmicutes_A;c__Clostridia;o__Oscillospirales;f__Oscillospiraceae;g__CAG	Bacteria	Firmicutes_A	Clostridia	Oscillospirales	Oscillospiraceae	CAG-110	unclassified	unclassified	5S ribosomal RNA,5S ribosomal RNA (partial),5S ribosomal RNA,5S ribosomal RNA	20	275	2501	52114	medium
megahit_BLJ17_bin.35	MAG-0236	BLJ17	megahit	84.71	1.38	1966353	41144	d__Bacteria;p__Verrucomicrobiota;c__Kiritimatiellae;o__RFP12;f__UBA1067;g__UBA1067;	Bacteria	Verrucomicrobiota	Kiritimatiellae	RFP12	UBA1067	UBA1067	unclassified	unclassified	5S ribosomal RNA,5S ribosomal RNA	20	78	2848	184411	medium
megahit_BLJ18_bin.13	MAG-0237	BLJ18	megahit	81.82	3.53	1741994	6228	d__Bacteria;p__Bacteroidota;c__Bacteroidia;o__Bacteroidales;f__Rikenellaceae;g__Alistipes;	Bacteria	Bacteroidota	Bacteroidia	Bacteroidales	Rikenellaceae	Alistipes	unclassified	unclassified		18	295	2545	33406	medium
megahit_BLJ18_bin.18	MAG-0238	BLJ18	megahit	85.36	5.47	2109194	9302	d__Bacteria;p__Bacteroidota;c__Bacteroidia;o__Bacteroidales;f__Bacteroidaceae;	Bacteria	Bacteroidota	Bacteroidia	Bacteroidales	Bacteroidaceae	unclassified	unclassified	unclassified		16	284	2505	58726	medium
megahit_BLJ18_bin.23	MAG-0239	BLJ18	megahit	85.9	3.36	1398373	12814	d__Bacteria;p__Firmicutes_A;c__Clostridia;o__Oscillospirales;f__CAG	Bacteria	Firmicutes_A	Clostridia	Oscillospirales	CAG-272	unclassified	unclassified	unclassified		17	142	2546	47542	medium
megahit_BLJ18_bin.29	MAG-0240	BLJ18	megahit	95.53	0.67	1735250	91763	d__Bacteria;p__Firmicutes_A;c__Clostridia;o__Oscillospirales;f__Acutalibacteraceae;	Bacteria	Firmicutes_A	Clostridia	Oscillospirales	Acutalibacteraceae	unclassified	unclassified	unclassified	5S ribosomal RNA,5S ribosomal RNA	20	40	4282	166210	high
megahit_BLJ18_bin.31	MAG-0241	BLJ18	megahit	83.64	4.41	1775356	8204	d__Bacteria;p__Bacteroidota;c__Bacteroidia;o__Bacteroidales;f__Rikenellaceae;g__Alistipes;	Bacteria	Bacteroidota	Bacteroidia	Bacteroidales	Rikenellaceae	Alistipes	unclassified	unclassified		18	258	2503	30221	medium
megahit_BLJ18_bin.40	MAG-0242	BLJ18	megahit	82.62	1.05	2081766	16857	d__Bacteria;p__Bacteroidota;c__Bacteroidia;o__Bacteroidales;f__Bacteroidaceae;g__UBA4372;	Bacteria	Bacteroidota	Bacteroidia	Bacteroidales	Bacteroidaceae	UBA4372	unclassified	unclassified	5S ribosomal RNA	19	175	2549	65452	medium
megahit_BLJ18_bin.47	MAG-0243	BLJ18	megahit	84.98	4.49	1850614	10037	d__Bacteria;p__Bacteroidota;c__Bacteroidia;o__Bacteroidales;f__Rikenellaceae;g__Alistipes;	Bacteria	Bacteroidota	Bacteroidia	Bacteroidales	Rikenellaceae	Alistipes	unclassified	unclassified		14	230	2536	36497	medium
megahit_BLJ18_bin.52	MAG-0244	BLJ18	megahit	92.73	1.68	2557865	34942	d__Bacteria;p__Firmicutes_A;c__Clostridia;o__Oscillospirales;f__Acutalibacteraceae;g__UBA6857;	Bacteria	Firmicutes_A	Clostridia	Oscillospirales	Acutalibacteraceae	UBA6857	unclassified	unclassified	16S ribosomal RNA (partial),5S ribosomal RNA,5S ribosomal RNA,5S ribosomal RNA,5S ribosomal RNA	20	109	2680	115079	high
megahit_BLJ19_bin.41	MAG-0245	BLJ19	megahit	95.97	0	1378249	65490	d__Bacteria;p__Firmicutes_A;c__Clostridia;o__4C28d	Bacteria	Firmicutes_A	Clostridia	4C28d-15	CAG-727	unclassified	unclassified	unclassified		19	33	3565	146692	high
megahit_BLJ21_bin.12	MAG-0246	BLJ21	megahit	92.28	0.03	1618779	13885	d__Bacteria;p__Bacteroidota;c__Bacteroidia;o__Flavobacteriales;f__UBA1820;	Bacteria	Bacteroidota	Bacteroidia	Flavobacteriales	UBA1820	unclassified	unclassified	unclassified		19	157	2509	40600	high
megahit_BLJ21_bin.15	MAG-0247	BLJ21	megahit	82.56	9.44	2228031	10755	d__Bacteria;p__Bacteroidota;c__Bacteroidia;o__Bacteroidales;f__Bacteroidaceae;	Bacteria	Bacteroidota	Bacteroidia	Bacteroidales	Bacteroidaceae	unclassified	unclassified	unclassified	5S ribosomal RNA,5S ribosomal RNA,5S ribosomal RNA	14	271	2529	45708	low
megahit_BLJ21_bin.45	MAG-0248	BLJ21	megahit	92.51	0.69	1594245	23790	d__Bacteria;p__Firmicutes_A;c__Clostridia;o__Oscillospirales;f__CAG	Bacteria	Firmicutes_A	Clostridia	Oscillospirales	CAG-272	unclassified	unclassified	unclassified		20	97	2745	91480	high
megahit_BLJ22_bin.22	MAG-0249	BLJ22	megahit	96.41	7.61	1662511	11372	d__Bacteria;p__Firmicutes_A;c__Clostridia;o__Lachnospirales;f__Lachnospiraceae;	Bacteria	Firmicutes_A	Clostridia	Lachnospirales	Lachnospiraceae	unclassified	unclassified	unclassified		19	201	2515	38512	medium
megahit_BLJ22_bin.31	MAG-0250	BLJ22	megahit	81.77	8.21	1888484	6239	d__Bacteria;p__Bacteroidota;c__Bacteroidia;o__Bacteroidales;f__Bacteroidaceae;	Bacteria	Bacteroidota	Bacteroidia	Bacteroidales	Bacteroidaceae	unclassified	unclassified	unclassified		16	332	2502	28035	low
megahit_BLJ22_bin.38	MAG-0251	BLJ22	megahit	91.03	5.03	1981695	20069	d__Bacteria;p__Firmicutes_A;c__Clostridia;o__Oscillospirales;f__Oscillospiraceae;g__CAG	Bacteria	Firmicutes_A	Clostridia	Oscillospirales	Oscillospiraceae	CAG-110	unclassified	unclassified	5S ribosomal RNA,5S ribosomal RNA	19	149	2534	81306	medium
megahit_BLJ22_bin.47	MAG-0252	BLJ22	megahit	84.09	1.13	1963345	20030	d__Bacteria;p__Bacteroidota;c__Bacteroidia;o__Bacteroidales;f__Muribaculaceae;	Bacteria	Bacteroidota	Bacteroidia	Bacteroidales	Muribaculaceae	unclassified	unclassified	unclassified	5S ribosomal RNA,5S ribosomal RNA (partial),5S ribosomal RNA (partial),5S ribosomal RNA (partial)	18	132	2535	57572	medium
megahit_BLJ23_bin.2	MAG-0253	BLJ23	megahit	88.37	1.51	1472361	11185	d__Bacteria;p__Firmicutes_A;c__Clostridia;o__Oscillospirales;f__Acutalibacteraceae;	Bacteria	Firmicutes_A	Clostridia	Oscillospirales	Acutalibacteraceae	unclassified	unclassified	unclassified	5S ribosomal RNA,5S ribosomal RNA (partial)	15	168	2517	33888	medium
megahit_BLJ23_bin.55	MAG-0254	BLJ23	megahit	84.93	0.07	1429685	7931	d__Bacteria;p__Bacteroidota;c__Bacteroidia;o__Flavobacteriales;f__UBA1820;	Bacteria	Bacteroidota	Bacteroidia	Flavobacteriales	UBA1820	unclassified	unclassified	unclassified		16	218	2526	34160	medium
megahit_BLJ23_bin.67	MAG-0255	BLJ23	megahit	91.07	0.5	1318359	13391	d__Bacteria;p__Firmicutes_A;c__Clostridia;o__Oscillospirales;f__Acutalibacteraceae;	Bacteria	Firmicutes_A	Clostridia	Oscillospirales	Acutalibacteraceae	unclassified	unclassified	unclassified	5S ribosomal RNA,5S ribosomal RNA	20	148	2519	37804	high
megahit_BLJ23_bin.71	MAG-0256	BLJ23	megahit	92.48	8.81	3974311	8709	d__Bacteria;p__Firmicutes_A;c__Clostridia;o__Lachnospirales;f__Lachnospiraceae;g__Acetatifactor;	Bacteria	Firmicutes_A	Clostridia	Lachnospirales	Lachnospiraceae	Acetatifactor	unclassified	unclassified		18	564	2506	56698	low
megahit_BLJ23_bin.84	MAG-0257	BLJ23	megahit	96.14	2.35	1984115	32673	d__Bacteria;p__Bacteroidota;c__Bacteroidia;o__Bacteroidales;f__Rikenellaceae;g__Alistipes;	Bacteria	Bacteroidota	Bacteroidia	Bacteroidales	Rikenellaceae	Alistipes	unclassified	unclassified	5S ribosomal RNA,5S ribosomal RNA	19	94	2556	96502	high
megahit_BLJ24_bin.45	MAG-0258	BLJ24	megahit	84.98	0.69	1227850	11360	d__Bacteria;p__Firmicutes_A;c__Clostridia;o__Oscillospirales;f__Acutalibacteraceae;g__UBA737;	Bacteria	Firmicutes_A	Clostridia	Oscillospirales	Acutalibacteraceae	UBA737	unclassified	unclassified		20	136	2515	29537	medium
megahit_BLJ24_bin.63	MAG-0259	BLJ24	megahit	84.49	0	862393	19170	d__Bacteria;p__Proteobacteria;c__Alphaproteobacteria;o__Rs	Bacteria	Proteobacteria	Alphaproteobacteria	Rs-D84	Rs-D84	Rs-D84	unclassified	unclassified	23S ribosomal RNA,16S ribosomal RNA	20	66	2694	46008	medium
megahit_BLJ24_bin.71	MAG-0260	BLJ24	megahit	88.26	2.06	2164780	18741	d__Bacteria;p__Bacteroidota;c__Bacteroidia;o__Bacteroidales;f__Bacteroidaceae;g__Prevotellamassilia;	Bacteria	Bacteroidota	Bacteroidia	Bacteroidales	Bacteroidaceae	Prevotellamassilia	unclassified	unclassified	5S ribosomal RNA (partial),16S ribosomal RNA (partial),5S ribosomal RNA (partial)	20	159	2598	67545	medium
megahit_BLJ25_bin.24	MAG-0261	BLJ25	megahit	83.72	6.41	1458705	7291	d__Bacteria;p__Bacteroidota;c__Bacteroidia;o__Bacteroidales;f__Rikenellaceae;g__Alistipes;	Bacteria	Bacteroidota	Bacteroidia	Bacteroidales	Rikenellaceae	Alistipes	unclassified	unclassified		12	226	2500	30100	medium
megahit_BLJ25_bin.28	MAG-0262	BLJ25	megahit	94.16	0.78	2302299	16362	d__Bacteria;p__Firmicutes_A;c__Clostridia;o__Oscillospirales;f__Acutalibacteraceae;g__Ruminococcus_E;s__Ruminococcus_E	Bacteria	Firmicutes_A	Clostridia	Oscillospirales	Acutalibacteraceae	Ruminococcus_E	Ruminococcus_E sp900315815	unclassified	5S ribosomal RNA,5S ribosomal RNA	20	191	2534	62580	high
megahit_BLJ25_bin.8	MAG-0263	BLJ25	megahit	89.88	2.87	2306289	26256	d__Bacteria;p__Bacteroidota;c__Bacteroidia;o__Bacteroidales;f__Bacteroidaceae;g__UBA4372;	Bacteria	Bacteroidota	Bacteroidia	Bacteroidales	Bacteroidaceae	UBA4372	unclassified	unclassified	5S ribosomal RNA,5S ribosomal RNA,5S ribosomal RNA (partial),5S ribosomal RNA,5S ribosomal RNA (partial)	20	129	2642	89942	medium
megahit_BLJ26_bin.25	MAG-0264	BLJ26	megahit	83.05	2.51	1885008	20118	d__Bacteria;p__Bacteroidota;c__Bacteroidia;o__Bacteroidales;f__Paludibacteraceae;g__RF16;	Bacteria	Bacteroidota	Bacteroidia	Bacteroidales	Paludibacteraceae	RF16	unclassified	unclassified	5S ribosomal RNA	20	158	2543	79558	medium
megahit_BLJ26_bin.26	MAG-0265	BLJ26	megahit	85.51	0.11	2205402	9936	d__Bacteria;p__Firmicutes_A;c__Clostridia;o__Oscillospirales;f__CAG	Bacteria	Firmicutes_A	Clostridia	Oscillospirales	CAG-272	unclassified	unclassified	unclassified		13	277	2531	42674	medium
megahit_BLJ26_bin.27	MAG-0266	BLJ26	megahit	81.47	3.12	3047565	12361	d__Bacteria;p__Verrucomicrobiota;c__Kiritimatiellae;o__RFP12;f__UBA1067;g__UBA1731;	Bacteria	Verrucomicrobiota	Kiritimatiellae	RFP12	UBA1067	UBA1731	unclassified	unclassified	5S ribosomal RNA	20	331	2500	46073	medium
megahit_BLJ26_bin.32	MAG-0267	BLJ26	megahit	87.79	2.76	3150074	29455	d__Bacteria;p__Verrucomicrobiota;c__Kiritimatiellae;o__RFP12;f__UBA1067;g__UBA1731;	Bacteria	Verrucomicrobiota	Kiritimatiellae	RFP12	UBA1067	UBA1731	unclassified	unclassified	5S ribosomal RNA	20	176	2520	108550	medium
megahit_BLJ28_bin.32	MAG-0268	BLJ28	megahit	87.35	5.06	2877170	17354	d__Bacteria;p__Firmicutes;c__Bacilli;o__RF39;f__CAG	Bacteria	Firmicutes	Bacilli	RF39	CAG-1000	UBA11963	unclassified	unclassified		20	263	2512	137840	medium
megahit_BLJ28_bin.4	MAG-0269	BLJ28	megahit	95.08	0.56	1751116	22117	d__Bacteria;p__Firmicutes_A;c__Clostridia;o__Monoglobales;	Bacteria	Firmicutes_A	Clostridia	Monoglobales	unclassified	unclassified	unclassified	unclassified	5S ribosomal RNA,5S ribosomal RNA	20	130	2511	58690	high
megahit_BLJ29_bin.1	MAG-0270	BLJ29	megahit	87.27	2.74	2365977	7745	d__Bacteria;p__Firmicutes_A;c__Clostridia;o__Oscillospirales;f__CAG	Bacteria	Firmicutes_A	Clostridia	Oscillospirales	CAG-272	unclassified	unclassified	unclassified	16S ribosomal RNA (partial),5S ribosomal RNA	11	360	2501	50696	medium
megahit_BLJ29_bin.14	MAG-0271	BLJ29	megahit	96.98	2.52	2059153	24102	d__Bacteria;p__Firmicutes_A;c__Clostridia;o__Monoglobales;	Bacteria	Firmicutes_A	Clostridia	Monoglobales	unclassified	unclassified	unclassified	unclassified	5S ribosomal RNA (partial),5S ribosomal RNA,5S ribosomal RNA	19	118	2692	116681	high
megahit_BLJ30_bin.12	MAG-0272	BLJ30	megahit	86.25	3.04	2551018	22565	d__Bacteria;p__Firmicutes_A;c__Clostridia;o__Oscillospirales;f__CAG	Bacteria	Firmicutes_A	Clostridia	Oscillospirales	CAG-272	CAG-390	unclassified	unclassified	5S ribosomal RNA,5S ribosomal RNA	20	175	2643	96692	medium
megahit_BLJ30_bin.55	MAG-0273	BLJ30	megahit	89.61	4.36	1776728	15746	d__Bacteria;p__Firmicutes_A;c__Clostridia;o__Oscillospirales;f__Oscillospiraceae;g__CAG	Bacteria	Firmicutes_A	Clostridia	Oscillospirales	Oscillospiraceae	CAG-110	unclassified	unclassified	5S ribosomal RNA,5S ribosomal RNA	19	156	2560	68837	medium
megahit_BLJ30_bin.9	MAG-0274	BLJ30	megahit	88.73	0.96	1584438	10472	d__Bacteria;p__Bacteroidota;c__Bacteroidia;o__Bacteroidales;f__Rikenellaceae;g__Alistipes;	Bacteria	Bacteroidota	Bacteroidia	Bacteroidales	Rikenellaceae	Alistipes	unclassified	unclassified		11	181	2541	37372	medium
megahit_BLJ31_bin.47	MAG-0275	BLJ31	megahit	91.72	0.34	1969408	25589	d__Bacteria;p__Firmicutes_A;c__Clostridia;o__Oscillospirales;f__CAG	Bacteria	Firmicutes_A	Clostridia	Oscillospirales	CAG-272	Firm-07	unclassified	unclassified		16	114	2582	68609	high
megahit_BLJ31_bin.52	MAG-0276	BLJ31	megahit	82.52	2.64	2253004	9830	d__Bacteria;p__Verrucomicrobiota;c__Kiritimatiellae;o__RFP12;f__UBA1067;g__UBA1067;	Bacteria	Verrucomicrobiota	Kiritimatiellae	RFP12	UBA1067	UBA1067	unclassified	unclassified	5S ribosomal RNA,5S ribosomal RNA,5S ribosomal RNA	20	290	2523	40641	medium
megahit_BLJ32_bin.13	MAG-0277	BLJ32	megahit	95.36	0	1984015	23090	d__Bacteria;p__Firmicutes_A;c__Clostridia;o__Oscillospirales;f__CAG	Bacteria	Firmicutes_A	Clostridia	Oscillospirales	CAG-272	unclassified	unclassified	unclassified		20	126	2644	64341	high
megahit_BLJ32_bin.37	MAG-0278	BLJ32	megahit	91.9	2.88	1551894	15596	d__Bacteria;p__Bacteroidota;c__Bacteroidia;o__Bacteroidales;f__Rikenellaceae;g__Alistipes;	Bacteria	Bacteroidota	Bacteroidia	Bacteroidales	Rikenellaceae	Alistipes	unclassified	unclassified	5S ribosomal RNA	18	128	2550	36750	high
megahit_BLJ32_bin.42	MAG-0279	BLJ32	megahit	97.32	0	1956817	32682	d__Bacteria;p__Firmicutes_A;c__Clostridia;o__Monoglobales;f__Firm	Bacteria	Firmicutes_A	Clostridia	Monoglobales	Firm-18	UBA1775	unclassified	unclassified		20	115	2510	106679	high
megahit_BLJ32_bin.43	MAG-0280	BLJ32	megahit	84.39	1.65	2039645	39774	d__Bacteria;p__Verrucomicrobiota;c__Kiritimatiellae;o__RFP12;f__UBA1067;g__UBA1067;	Bacteria	Verrucomicrobiota	Kiritimatiellae	RFP12	UBA1067	UBA1067	unclassified	unclassified	5S ribosomal RNA,5S ribosomal RNA,5S ribosomal RNA	20	70	2683	204382	medium
megahit_BLJ32_bin.45	MAG-0281	BLJ32	megahit	91.18	0.04	1528831	26123	d__Bacteria;p__Firmicutes_A;c__Clostridia;o__Oscillospirales;f__CAG	Bacteria	Firmicutes_A	Clostridia	Oscillospirales	CAG-272	unclassified	unclassified	unclassified		18	89	2609	64637	high
megahit_BLJ33_bin.67	MAG-0282	BLJ33	megahit	81.34	6.99	1348188	20477	d__Bacteria;p__Proteobacteria;c__Alphaproteobacteria;o__RF32;f__UBA3637;g__UBA7488;	Bacteria	Proteobacteria	Alphaproteobacteria	RF32	UBA3637	UBA7488	unclassified	unclassified	5S ribosomal RNA,5S ribosomal RNA	20	90	2586	64086	low
megahit_BLJ33_bin.78	MAG-0283	BLJ33	megahit	82.16	4.23	1733762	8518	d__Bacteria;p__Firmicutes_A;c__Clostridia;o__Oscillospirales;f__CAG	Bacteria	Firmicutes_A	Clostridia	Oscillospirales	CAG-272	CAG-448	unclassified	unclassified		13	253	2502	31808	medium
megahit_BLJ35_bin.19	MAG-0284	BLJ35	megahit	89.74	1.71	2593748	52416	d__Bacteria;p__Cyanobacteria;c__Vampirovibrionia;o__Gastranaerophilales;f__Gastranaerophilaceae;g__CAG	Bacteria	Cyanobacteria	Vampirovibrionia	Gastranaerophilales	Gastranaerophilaceae	CAG-306	unclassified	unclassified	5S ribosomal RNA (partial),23S ribosomal RNA (partial),5S ribosomal RNA,5S ribosomal RNA,23S ribosomal RNA (partial),16S ribosomal RNA (partial)	20	91	2683	205114	medium
megahit_BLJ35_bin.27	MAG-0285	BLJ35	megahit	95.45	9.38	2098884	54273	d__Bacteria;p__Bacteroidota;c__Bacteroidia;o__Bacteroidales;f__Rikenellaceae;g__Alistipes;	Bacteria	Bacteroidota	Bacteroidia	Bacteroidales	Rikenellaceae	Alistipes	unclassified	unclassified		19	67	2695	114190	low
megahit_BLJ35_bin.28	MAG-0286	BLJ35	megahit	88.52	3.37	1966762	21877	d__Bacteria;p__Bacteroidota;c__Bacteroidia;o__Bacteroidales;f__Rikenellaceae;g__Alistipes;	Bacteria	Bacteroidota	Bacteroidia	Bacteroidales	Rikenellaceae	Alistipes	unclassified	unclassified		17	130	2588	53594	medium
megahit_BLJ35_bin.34	MAG-0287	BLJ35	megahit	96.24	2.15	2359870	43005	d__Bacteria;p__Bacteroidota;c__Bacteroidia;o__Bacteroidales;f__Paludibacteraceae;	Bacteria	Bacteroidota	Bacteroidia	Bacteroidales	Paludibacteraceae	unclassified	unclassified	unclassified	16S ribosomal RNA (partial),5S ribosomal RNA	20	90	2504	108354	high
megahit_BLJ35_bin.36	MAG-0288	BLJ35	megahit	90.32	0.59	2246676	14345	d__Bacteria;p__Bacteroidota;c__Bacteroidia;o__Bacteroidales;f__P3;g__UBA1219;	Bacteria	Bacteroidota	Bacteroidia	Bacteroidales	P3	UBA1219	unclassified	unclassified	5S ribosomal RNA,5S ribosomal RNA	20	205	2513	72641	high
megahit_BLJ35_bin.38	MAG-0289	BLJ35	megahit	96.24	1.08	2102096	40880	d__Bacteria;p__Bacteroidota;c__Bacteroidia;o__Bacteroidales;f__P3;g__UBA3388;	Bacteria	Bacteroidota	Bacteroidia	Bacteroidales	P3	UBA3388	unclassified	unclassified	5S ribosomal RNA (partial)	20	78	3121	113736	high
megahit_BLJ35_bin.43	MAG-0290	BLJ35	megahit	89.56	0.55	1278658	10480	d__Bacteria;p__Proteobacteria;c__Alphaproteobacteria;o__RF32;f__UBA3637;	Bacteria	Proteobacteria	Alphaproteobacteria	RF32	UBA3637	unclassified	unclassified	unclassified		19	152	2533	34813	medium
megahit_BLJ35_bin.49	MAG-0291	BLJ35	megahit	96.62	0	1440503	12941	d__Bacteria;p__Campylobacterota;c__Campylobacteria;o__Campylobacterales;f__Campylobacteraceae;g__Campylobacter;	Bacteria	Campylobacterota	Campylobacteria	Campylobacterales	Campylobacteraceae	Campylobacter	unclassified	unclassified		17	145	2525	64600	high
megahit_BLJ35_bin.50	MAG-0292	BLJ35	megahit	86.81	0	903911	236865	d__Bacteria;p__Proteobacteria;c__Alphaproteobacteria;o__Rs	Bacteria	Proteobacteria	Alphaproteobacteria	Rs-D84	Rs-D84	Rs-D84	unclassified	unclassified	16S ribosomal RNA,23S ribosomal RNA	20	10	14600	307308	medium
megahit_BLJ35_bin.6	MAG-0293	BLJ35	megahit	98.39	1.08	1844966	133333	d__Bacteria;p__Bacteroidota;c__Bacteroidia;o__Bacteroidales;f__Paludibacteraceae;	Bacteria	Bacteroidota	Bacteroidia	Bacteroidales	Paludibacteraceae	unclassified	unclassified	unclassified	5S ribosomal RNA	20	20	6664	419457	high
megahit_BLJ5_bin.27	MAG-0294	BLJ5	megahit	91.26	1.61	1510630	23606	d__Bacteria;p__Firmicutes_A;c__Clostridia;o__4C28d	Bacteria	Firmicutes_A	Clostridia	4C28d-15	CAG-727	QALS01	unclassified	unclassified	5S ribosomal RNA (partial)	17	94	2698	77224	high
megahit_BLJ5_bin.34	MAG-0295	BLJ5	megahit	91.73	0.88	1310751	12526	d__Bacteria;p__Firmicutes_A;c__Clostridia;o__4C28d	Bacteria	Firmicutes_A	Clostridia	4C28d-15	CAG-727	unclassified	unclassified	unclassified	5S ribosomal RNA,16S ribosomal RNA (partial)	17	142	2599	37797	high
megahit_BLJ5_bin.52	MAG-0296	BLJ5	megahit	93.08	5.01	1928023	15770	d__Bacteria;p__Bacteroidota;c__Bacteroidia;o__Bacteroidales;f__Rikenellaceae;g__Alistipes;	Bacteria	Bacteroidota	Bacteroidia	Bacteroidales	Rikenellaceae	Alistipes	unclassified	unclassified		19	165	2500	53369	medium
megahit_BLJ5_bin.55	MAG-0297	BLJ5	megahit	96.06	0.66	2374361	22524	d__Bacteria;p__Firmicutes_A;c__Clostridia;o__Oscillospirales;f__CAG	Bacteria	Firmicutes_A	Clostridia	Oscillospirales	CAG-272	unclassified	unclassified	unclassified		19	164	2559	85885	high
megahit_BLJ5_bin.57	MAG-0298	BLJ5	megahit	96.18	1.72	2114026	17637	d__Bacteria;p__Verrucomicrobiota;c__Verrucomicrobiae;o__Verrucomicrobiales;f__Akkermansiaceae;g__Akkermansia;	Bacteria	Verrucomicrobiota	Verrucomicrobiae	Verrucomicrobiales	Akkermansiaceae	Akkermansia	unclassified	unclassified	5S ribosomal RNA	19	162	2534	81259	high
megahit_BLJ5_bin.79	MAG-0299	BLJ5	megahit	83.68	2.02	1091956	7731	d__Bacteria;p__Firmicutes_A;c__Clostridia;o__4C28d	Bacteria	Firmicutes_A	Clostridia	4C28d-15	CAG-727	UBA1259	unclassified	unclassified	5S ribosomal RNA,16S ribosomal RNA (partial)	9	170	2525	28281	medium
megahit_BLJ5_bin.80	MAG-0300	BLJ5	megahit	87.91	0.8	1709278	35555	d__Bacteria;p__Firmicutes_A;c__Clostridia;o__Oscillospirales;f__CAG	Bacteria	Firmicutes_A	Clostridia	Oscillospirales	CAG-272	UBA1740	unclassified	unclassified		16	80	3006	103270	medium
megahit_BLJ6_bin.16	MAG-0301	BLJ6	megahit	80.17	2.66	1395586	9285	d__Bacteria;p__Bacteroidota;c__Bacteroidia;o__Bacteroidales;f__Paludibacteraceae;	Bacteria	Bacteroidota	Bacteroidia	Bacteroidales	Paludibacteraceae	unclassified	unclassified	unclassified	16S ribosomal RNA (partial)	18	178	2554	41952	medium
megahit_BLJ6_bin.58	MAG-0302	BLJ6	megahit	88.65	3.36	1564647	8799	d__Bacteria;p__Firmicutes_A;c__Clostridia;o__Oscillospirales;f__Acutalibacteraceae;g__Ruminococcus_E;	Bacteria	Firmicutes_A	Clostridia	Oscillospirales	Acutalibacteraceae	Ruminococcus_E	unclassified	unclassified	5S ribosomal RNA	17	218	2536	28952	medium
megahit_BLJ6_bin.68	MAG-0303	BLJ6	megahit	97.99	2.35	2580401	44174	d__Bacteria;p__Firmicutes_A;c__Clostridia;o__Lachnospirales;f__Lachnospiraceae;g__CAG	Bacteria	Firmicutes_A	Clostridia	Lachnospirales	Lachnospiraceae	CAG-303	unclassified	unclassified		20	84	2680	287885	high
megahit_BLJ6_bin.69	MAG-0304	BLJ6	megahit	94.18	4.63	2369337	14990	d__Bacteria;p__Spirochaetota;c__Spirochaetia;o__Treponematales;f__Treponemataceae;g__Treponema_D;	Bacteria	Spirochaetota	Spirochaetia	Treponematales	Treponemataceae	Treponema_D	unclassified	unclassified	5S ribosomal RNA,5S ribosomal RNA,23S ribosomal RNA (partial)	20	225	2513	61419	high
megahit_BLJ7_bin.23	MAG-0305	BLJ7	megahit	80.75	3.74	1789546	10230	d__Bacteria;p__Firmicutes_A;c__Clostridia;o__Lachnospirales;f__Lachnospiraceae;g__CAG	Bacteria	Firmicutes_A	Clostridia	Lachnospirales	Lachnospiraceae	CAG-303	unclassified	unclassified		18	233	2517	44253	medium
megahit_BLJ7_bin.27	MAG-0306	BLJ7	megahit	91.89	2.01	1629851	11268	d__Bacteria;p__Firmicutes_A;c__Clostridia;o__Oscillospirales;f__Acutalibacteraceae;	Bacteria	Firmicutes_A	Clostridia	Oscillospirales	Acutalibacteraceae	unclassified	unclassified	unclassified		15	183	2509	57795	high
megahit_BLJ7_bin.39	MAG-0307	BLJ7	megahit	88.92	2.18	1610124	14805	d__Bacteria;p__Firmicutes_A;c__Clostridia;o__Oscillospirales;f__Oscillospiraceae;g__CAG	Bacteria	Firmicutes_A	Clostridia	Oscillospirales	Oscillospiraceae	CAG-110	unclassified	unclassified	5S ribosomal RNA	20	145	2505	63201	medium
megahit_BLJ7_bin.41	MAG-0308	BLJ7	megahit	83.07	1.2	1920826	19319	d__Bacteria;p__Bacteroidota;c__Bacteroidia;o__Bacteroidales;f__Rikenellaceae;g__Alistipes;	Bacteria	Bacteroidota	Bacteroidia	Bacteroidales	Rikenellaceae	Alistipes	unclassified	unclassified	5S ribosomal RNA	17	140	2538	70390	medium
megahit_BLJ8_bin.10	MAG-0309	BLJ8	megahit	93.01	0	2270798	78512	d__Bacteria;p__Spirochaetota;c__Spirochaetia;o__Treponematales;f__Treponemataceae;g__Treponema_D;	Bacteria	Spirochaetota	Spirochaetia	Treponematales	Treponemataceae	Treponema_D	unclassified	unclassified	5S ribosomal RNA,5S ribosomal RNA (partial)	20	39	3497	186359	high
megahit_BLJ8_bin.39	MAG-0310	BLJ8	megahit	99.3	0.02	2532037	54186	d__Bacteria;p__Spirochaetota;c__Spirochaetia;o__Treponematales;f__Treponemataceae;g__Treponema_F;	Bacteria	Spirochaetota	Spirochaetia	Treponematales	Treponemataceae	Treponema_F	unclassified	unclassified	5S ribosomal RNA,5S ribosomal RNA,5S ribosomal RNA,5S ribosomal RNA	20	74	3152	125456	high
megahit_BLJ8_bin.48	MAG-0311	BLJ8	megahit	96.76	1.7	2522093	26589	d__Bacteria;p__Firmicutes_A;c__Clostridia;o__Monoglobales;	Bacteria	Firmicutes_A	Clostridia	Monoglobales	unclassified	unclassified	unclassified	unclassified	5S ribosomal RNA,5S ribosomal RNA (partial)	20	164	2519	98616	high
megahit_BLJ8_bin.9	MAG-0312	BLJ8	megahit	89.18	0.04	1522066	33423	d__Bacteria;p__Firmicutes_A;c__Clostridia;o__Oscillospirales;f__CAG	Bacteria	Firmicutes_A	Clostridia	Oscillospirales	CAG-272	unclassified	unclassified	unclassified		16	68	2608	96887	medium
megahit_BLJ9_bin.11	MAG-0313	BLJ9	megahit	91.72	0.69	1452784	27237	d__Bacteria;p__Firmicutes_A;c__Clostridia;o__Oscillospirales;f__CAG	Bacteria	Firmicutes_A	Clostridia	Oscillospirales	CAG-272	UBA1740	unclassified	unclassified	16S ribosomal RNA (partial)	15	72	3061	89810	high
megahit_BLJ9_bin.14	MAG-0314	BLJ9	megahit	87.51	1.7	1850296	18555	d__Bacteria;p__Firmicutes_A;c__Clostridia;o__Oscillospirales;f__CAG	Bacteria	Firmicutes_A	Clostridia	Oscillospirales	CAG-272	unclassified	unclassified	unclassified		18	143	2598	54085	medium
megahit_BLJ9_bin.38	MAG-0315	BLJ9	megahit	85.17	1.34	1568084	13192	d__Bacteria;p__Firmicutes_A;c__Clostridia;o__Oscillospirales;f__Oscillospiraceae;g__CAG	Bacteria	Firmicutes_A	Clostridia	Oscillospirales	Oscillospiraceae	CAG-110	unclassified	unclassified	5S ribosomal RNA	20	161	2553	49618	medium
megahit_BLJ9_bin.43	MAG-0316	BLJ9	megahit	86.21	5.73	2119204	18247	d__Bacteria;p__Bacteroidota;c__Bacteroidia;o__Bacteroidales;f__UBA932;g__RC9;	Bacteria	Bacteroidota	Bacteroidia	Bacteroidales	UBA932	RC9	unclassified	unclassified	5S ribosomal RNA	18	173	2529	71632	medium
megahit_FGD1_S1_L003_bin.19	MAG-0317	FGD1_S1_L003	megahit	89.15	2.52	2279310	62271	d__Bacteria;p__Firmicutes_A;c__Clostridia;o__Oscillospirales;f__Acutalibacteraceae;g__DTU089_A;	Bacteria	Firmicutes_A	Clostridia	Oscillospirales	Acutalibacteraceae	DTU089_A	unclassified	unclassified	5S ribosomal RNA	19	75	2523	181289	medium
megahit_FGD1_S1_L003_bin.26	MAG-0318	FGD1_S1_L003	megahit	89.99	1.54	2090605	19457	d__Bacteria;p__Bacteroidota;c__Bacteroidia;o__Bacteroidales;f__Muribaculaceae;g__Paramuribaculum;	Bacteria	Bacteroidota	Bacteroidia	Bacteroidales	Muribaculaceae	Paramuribaculum	unclassified	unclassified	5S ribosomal RNA	19	159	2698	44223	medium
megahit_FGD1_S1_L003_bin.41	MAG-0319	FGD1_S1_L003	megahit	88.39	0.99	1762004	10412	d__Bacteria;p__Bacteroidota;c__Bacteroidia;o__Bacteroidales;f__Rikenellaceae;g__Alistipes;	Bacteria	Bacteroidota	Bacteroidia	Bacteroidales	Rikenellaceae	Alistipes	unclassified	unclassified	5S ribosomal RNA	18	210	2502	38563	medium
megahit_FGD10_S137_L002_bin.20	MAG-0320	FGD10_S137_L002	megahit	89.31	2.24	2246851	10418	d__Bacteria;p__Firmicutes_A;c__Clostridia;o__Oscillospirales;f__Acutalibacteraceae;g__UBA6857;	Bacteria	Firmicutes_A	Clostridia	Oscillospirales	Acutalibacteraceae	UBA6857	unclassified	unclassified		19	273	2503	39793	medium
megahit_FGD10_S137_L002_bin.22	MAG-0321	FGD10_S137_L002	megahit	92.99	0.45	1909809	15332	d__Bacteria;p__Firmicutes_A;c__Clostridia;o__Lachnospirales;f__Anaerotignaceae;g__Anaerotignum;	Bacteria	Firmicutes_A	Clostridia	Lachnospirales	Anaerotignaceae	Anaerotignum	unclassified	unclassified		19	172	2686	62283	high
megahit_FGD10_S137_L002_bin.9	MAG-0322	FGD10_S137_L002	megahit	87.45	1.55	2795316	18897	d__Bacteria;p__Bacteroidota;c__Bacteroidia;o__Bacteroidales;f__Bacteroidaceae;g__UBA4372;	Bacteria	Bacteroidota	Bacteroidia	Bacteroidales	Bacteroidaceae	UBA4372	unclassified	unclassified	5S ribosomal RNA,5S ribosomal RNA,5S ribosomal RNA	20	200	2524	74901	medium
megahit_FGD11_S138_L002_bin.5	MAG-0323	FGD11_S138_L002	megahit	97.99	1.01	1685864	52448	d__Bacteria;p__Firmicutes_A;c__Clostridia;o__Oscillospirales;f__Acutalibacteraceae;	Bacteria	Firmicutes_A	Clostridia	Oscillospirales	Acutalibacteraceae	unclassified	unclassified	unclassified	5S ribosomal RNA,5S ribosomal RNA,16S ribosomal RNA (partial)	20	64	2533	138970	high
megahit_FGD11_S138_L002_bin.6	MAG-0324	FGD11_S138_L002	megahit	94.02	0.02	2264849	42281	d__Bacteria;p__Bacteroidota;c__Bacteroidia;o__Bacteroidales;f__Bacteroidaceae;g__F0040;	Bacteria	Bacteroidota	Bacteroidia	Bacteroidales	Bacteroidaceae	F0040	unclassified	unclassified	5S ribosomal RNA (partial)	20	76	4683	105862	high
megahit_FGD11_S138_L002_bin.7	MAG-0325	FGD11_S138_L002	megahit	81.06	0.48	2238233	112382	d__Bacteria;p__Firmicutes_A;c__Clostridia;o__Lachnospirales;f__Lachnospiraceae;g__Agathobacter;	Bacteria	Firmicutes_A	Clostridia	Lachnospirales	Lachnospiraceae	Agathobacter	unclassified	unclassified		20	46	2537	225389	medium
megahit_FGD12_S139_L002_bin.26	MAG-0326	FGD12_S139_L002	megahit	91.16	1.4	1713531	8490	d__Bacteria;p__Firmicutes_A;c__Clostridia;o__Lachnospirales;f__Anaerotignaceae;g__Anaerotignum;	Bacteria	Firmicutes_A	Clostridia	Lachnospirales	Anaerotignaceae	Anaerotignum	unclassified	unclassified	5S ribosomal RNA	18	244	2506	29122	high
megahit_FGD12_S139_L002_bin.33	MAG-0327	FGD12_S139_L002	megahit	82.98	0.6	1667209	9783	d__Bacteria;p__Bacteroidota;c__Bacteroidia;o__Bacteroidales;f__UBA932;g__UBA1232;	Bacteria	Bacteroidota	Bacteroidia	Bacteroidales	UBA932	UBA1232	unclassified	unclassified	5S ribosomal RNA,5S ribosomal RNA	19	222	2528	25070	medium
megahit_FGD12_S139_L002_bin.50	MAG-0328	FGD12_S139_L002	megahit	95.93	2.32	1808686	47835	d__Bacteria;p__Bacteroidota;c__Bacteroidia;o__Bacteroidales;f__Rikenellaceae;g__Alistipes;	Bacteria	Bacteroidota	Bacteroidia	Bacteroidales	Rikenellaceae	Alistipes	unclassified	unclassified		16	46	4407	105221	high
megahit_FGD13_S140_L002_bin.18	MAG-0329	FGD13_S140_L002	megahit	92.67	0.81	1390241	9957	d__Bacteria;p__Firmicutes_A;c__Clostridia;o__Oscillospirales;f__Acutalibacteraceae;	Bacteria	Firmicutes_A	Clostridia	Oscillospirales	Acutalibacteraceae	unclassified	unclassified	unclassified	5S ribosomal RNA	17	174	2531	33145	high
megahit_FGD13_S140_L002_bin.28	MAG-0330	FGD13_S140_L002	megahit	89.52	0.67	2162353	23231	d__Bacteria;p__Firmicutes_A;c__Clostridia;o__Oscillospirales;f__Acutalibacteraceae;g__UBA1081;	Bacteria	Firmicutes_A	Clostridia	Oscillospirales	Acutalibacteraceae	UBA1081	unclassified	unclassified	5S ribosomal RNA,5S ribosomal RNA	20	127	2548	84054	medium
megahit_FGD13_S140_L002_bin.35	MAG-0331	FGD13_S140_L002	megahit	94.23	2.54	1596339	41241	d__Bacteria;p__Firmicutes_A;c__Clostridia;o__Oscillospirales;f__Oscillospiraceae;g__CAG	Bacteria	Firmicutes_A	Clostridia	Oscillospirales	Oscillospiraceae	CAG-110	unclassified	unclassified	5S ribosomal RNA,5S ribosomal RNA	20	87	2543	103504	high
megahit_FGD13_S140_L002_bin.54	MAG-0332	FGD13_S140_L002	megahit	95.62	2.01	2431104	44209	d__Bacteria;p__Firmicutes_A;c__Clostridia;o__Oscillospirales;f__CAG	Bacteria	Firmicutes_A	Clostridia	Oscillospirales	CAG-272	unclassified	unclassified	unclassified		20	84	2590	204346	high
megahit_FGD14_S141_L002_bin.13	MAG-0333	FGD14_S141_L002	megahit	83.01	2.38	2360607	28411	d__Bacteria;p__Bacteroidota;c__Bacteroidia;o__Bacteroidales;f__UBA932;g__RC9;	Bacteria	Bacteroidota	Bacteroidia	Bacteroidales	UBA932	RC9	unclassified	unclassified	5S ribosomal RNA	19	168	2511	97895	medium
megahit_FGD14_S141_L002_bin.29	MAG-0334	FGD14_S141_L002	megahit	99.3	1.4	2618904	49384	d__Bacteria;p__Spirochaetota;c__Spirochaetia;o__Treponematales;f__Treponemataceae;	Bacteria	Spirochaetota	Spirochaetia	Treponematales	Treponemataceae	unclassified	unclassified	unclassified	5S ribosomal RNA,5S ribosomal RNA	20	91	2574	256001	high
megahit_FGD14_S141_L002_bin.49	MAG-0335	FGD14_S141_L002	megahit	85.85	2.85	1358588	10486	d__Bacteria;p__Firmicutes_A;c__Clostridia;o__Oscillospirales;f__Acutalibacteraceae;	Bacteria	Firmicutes_A	Clostridia	Oscillospirales	Acutalibacteraceae	unclassified	unclassified	unclassified	5S ribosomal RNA	16	172	2549	31722	medium
megahit_FGD3_S3_L003_bin.1	MAG-0336	FGD3_S3_L003	megahit	94.52	0	1472319	61403	d__Bacteria;p__Firmicutes_A;c__Clostridia;o__Oscillospirales;f__Ruminococcaceae;g__UBA11540;	Bacteria	Firmicutes_A	Clostridia	Oscillospirales	Ruminococcaceae	UBA11540	unclassified	unclassified	5S ribosomal RNA,5S ribosomal RNA,5S ribosomal RNA,16S ribosomal RNA (partial)	20	48	2553	147022	high
megahit_FGD3_S3_L003_bin.24	MAG-0337	FGD3_S3_L003	megahit	89.81	1.57	1768226	11176	d__Bacteria;p__Firmicutes_A;c__Clostridia;o__Lachnospirales;f__Anaerotignaceae;g__Anaerotignum;	Bacteria	Firmicutes_A	Clostridia	Lachnospirales	Anaerotignaceae	Anaerotignum	unclassified	unclassified	5S ribosomal RNA	19	209	2516	51774	medium
megahit_FGD3_S3_L003_bin.3	MAG-0338	FGD3_S3_L003	megahit	89.59	2.44	1716496	13525	d__Bacteria;p__Bacteroidota;c__Bacteroidia;o__Bacteroidales;f__UBA932;g__UBA1232;	Bacteria	Bacteroidota	Bacteroidia	Bacteroidales	UBA932	UBA1232	unclassified	unclassified	5S ribosomal RNA	20	158	2536	47993	medium
megahit_FGD3_S3_L003_bin.49	MAG-0339	FGD3_S3_L003	megahit	86.95	1.58	1716293	8634	d__Bacteria;p__Firmicutes_C;c__Negativicutes;o__Selenomonadales;f__Selenomonadaceae;g__Anaerovibrio;	Bacteria	Firmicutes_C	Negativicutes	Selenomonadales	Selenomonadaceae	Anaerovibrio	unclassified	unclassified	5S ribosomal RNA	16	235	2513	30305	medium
megahit_FGD4_S4_L003_bin.22	MAG-0340	FGD4_S4_L003	megahit	80.14	5.26	1824033	71705	d__Bacteria;p__Firmicutes_A;c__Clostridia;o__Lachnospirales;f__Lachnospiraceae;	Bacteria	Firmicutes_A	Clostridia	Lachnospirales	Lachnospiraceae	unclassified	unclassified	unclassified		18	45	2549	157931	medium
megahit_FGD4_S4_L003_bin.45	MAG-0341	FGD4_S4_L003	megahit	84.53	1.46	1971593	22481	d__Bacteria;p__Bacteroidota;c__Bacteroidia;o__Bacteroidales;f__Muribaculaceae;	Bacteria	Bacteroidota	Bacteroidia	Bacteroidales	Muribaculaceae	unclassified	unclassified	unclassified	5S ribosomal RNA (partial),5S ribosomal RNA (partial)	20	128	2650	94741	medium
megahit_FGD5_S5_L003_bin.16	MAG-0342	FGD5_S5_L003	megahit	91.35	0.4	1690672	13114	d__Bacteria;p__Firmicutes_A;c__Clostridia;o__Christensenellales;f__CAG	Bacteria	Firmicutes_A	Clostridia	Christensenellales	CAG-138	unclassified	unclassified	unclassified		19	185	2614	35673	high
megahit_FGD5_S5_L003_bin.17	MAG-0343	FGD5_S5_L003	megahit	98.92	0.27	2664665	54569	d__Bacteria;p__Bacteroidota;c__Bacteroidia;o__Bacteroidales;f__P3;g__UBA1219;	Bacteria	Bacteroidota	Bacteroidia	Bacteroidales	P3	UBA1219	unclassified	unclassified	5S ribosomal RNA	20	80	2815	136875	high
megahit_FGD5_S5_L003_bin.19	MAG-0344	FGD5_S5_L003	megahit	91.74	0.34	2359458	23093	d__Bacteria;p__Firmicutes_A;c__Clostridia;o__Oscillospirales;f__Acutalibacteraceae;g__UBA8612;	Bacteria	Firmicutes_A	Clostridia	Oscillospirales	Acutalibacteraceae	UBA8612	unclassified	unclassified	5S ribosomal RNA,5S ribosomal RNA	20	158	2503	135651	high
megahit_FGD5_S5_L003_bin.26	MAG-0345	FGD5_S5_L003	megahit	91.14	2.14	1938721	42759	d__Bacteria;p__Bacteroidota;c__Bacteroidia;o__Bacteroidales;f__UBA932;g__RC9;	Bacteria	Bacteroidota	Bacteroidia	Bacteroidales	UBA932	RC9	unclassified	unclassified	5S ribosomal RNA (partial),5S ribosomal RNA,5S ribosomal RNA (partial)	20	93	2538	117317	high
megahit_FGD5_S5_L003_bin.7	MAG-0346	FGD5_S5_L003	megahit	94.46	1.79	1456763	23486	d__Bacteria;p__Firmicutes_A;c__Clostridia;o__Oscillospirales;f__Acutalibacteraceae;	Bacteria	Firmicutes_A	Clostridia	Oscillospirales	Acutalibacteraceae	unclassified	unclassified	unclassified	5S ribosomal RNA,5S ribosomal RNA	18	94	2629	61145	high
megahit_FGD6_S6_L003_bin.16	MAG-0347	FGD6_S6_L003	megahit	96.23	0.83	1817999	118705	d__Bacteria;p__Bacteroidota;c__Bacteroidia;o__Bacteroidales;f__Rikenellaceae;	Bacteria	Bacteroidota	Bacteroidia	Bacteroidales	Rikenellaceae	unclassified	unclassified	unclassified		20	23	15652	234932	high
megahit_FGD6_S6_L003_bin.19	MAG-0348	FGD6_S6_L003	megahit	89.8	2.12	2568217	102216	d__Bacteria;p__Bacteroidota;c__Bacteroidia;o__Bacteroidales;f__Bacteroidaceae;g__UBA1189;	Bacteria	Bacteroidota	Bacteroidia	Bacteroidales	Bacteroidaceae	UBA1189	unclassified	unclassified	5S ribosomal RNA,5S ribosomal RNA,5S ribosomal RNA	20	40	5092	203392	medium
megahit_FGD6_S6_L003_bin.28	MAG-0349	FGD6_S6_L003	megahit	91.59	0.34	1886951	41232	d__Bacteria;p__Firmicutes_A;c__Clostridia;o__Oscillospirales;f__CAG	Bacteria	Firmicutes_A	Clostridia	Oscillospirales	CAG-382	unclassified	unclassified	unclassified	5S ribosomal RNA	19	86	2764	110794	high
megahit_FGD6_S6_L003_bin.42	MAG-0350	FGD6_S6_L003	megahit	89.65	0	2377125	26599	d__Bacteria;p__Bacteroidota;c__Bacteroidia;o__Bacteroidales;f__Bacteroidaceae;g__F0040;	Bacteria	Bacteroidota	Bacteroidia	Bacteroidales	Bacteroidaceae	F0040	unclassified	unclassified	16S ribosomal RNA (partial),5S ribosomal RNA,5S ribosomal RNA,5S ribosomal RNA	20	117	2757	106191	medium
megahit_FGD7_S7_L003_bin.18	MAG-0351	FGD7_S7_L003	megahit	80.17	0	2454244	40064	d__Bacteria;p__Bacteroidota;c__Bacteroidia;o__Bacteroidales;f__Bacteroidaceae;g__UBA1189;	Bacteria	Bacteroidota	Bacteroidia	Bacteroidales	Bacteroidaceae	UBA1189	unclassified	unclassified	5S ribosomal RNA,5S ribosomal RNA (partial)	20	91	2581	126625	medium
megahit_FGD7_S7_L003_bin.25	MAG-0352	FGD7_S7_L003	megahit	97.58	1.52	1877797	82414	d__Bacteria;p__Bacteroidota;c__Bacteroidia;o__Bacteroidales;f__Rikenellaceae;g__Alistipes;	Bacteria	Bacteroidota	Bacteroidia	Bacteroidales	Rikenellaceae	Alistipes	unclassified	unclassified		18	39	3002	139538	high
megahit_FGD7_S7_L003_bin.35	MAG-0353	FGD7_S7_L003	megahit	93	9.98	2300015	30837	d__Bacteria;p__Firmicutes_A;c__Clostridia;o__Oscillospirales;f__Oscillospiraceae;g__CAG	Bacteria	Firmicutes_A	Clostridia	Oscillospirales	Oscillospiraceae	CAG-110	unclassified	unclassified	5S ribosomal RNA,5S ribosomal RNA (partial),5S ribosomal RNA (partial)	16	131	2525	139010	low
megahit_FGD7_S7_L003_bin.41	MAG-0354	FGD7_S7_L003	megahit	80.25	0.5	1112742	7751	d__Bacteria;p__Firmicutes_A;c__Clostridia;o__Oscillospirales;f__Acutalibacteraceae;	Bacteria	Firmicutes_A	Clostridia	Oscillospirales	Acutalibacteraceae	unclassified	unclassified	unclassified	5S ribosomal RNA	15	174	2521	32940	medium
megahit_FGD7_S7_L003_bin.50	MAG-0355	FGD7_S7_L003	megahit	89.31	4.57	2049369	9300	d__Bacteria;p__Bacteroidota;c__Bacteroidia;o__Bacteroidales;f__Rikenellaceae;g__Alistipes;	Bacteria	Bacteroidota	Bacteroidia	Bacteroidales	Rikenellaceae	Alistipes	unclassified	unclassified		18	286	2504	41921	medium
megahit_FGD8_S8_L003_bin.11	MAG-0356	FGD8_S8_L003	megahit	97.92	0.91	1880193	49241	d__Bacteria;p__Bacteroidota;c__Bacteroidia;o__Bacteroidales;f__Rikenellaceae;g__Alistipes;	Bacteria	Bacteroidota	Bacteroidia	Bacteroidales	Rikenellaceae	Alistipes	unclassified	unclassified	5S ribosomal RNA	17	65	2961	84841	high
megahit_FGD8_S8_L003_bin.34	MAG-0357	FGD8_S8_L003	megahit	92.39	1.43	2961532	25516	d__Bacteria;p__Bacteroidota;c__Bacteroidia;o__Bacteroidales;f__Bacteroidaceae;g__UBA4372;	Bacteria	Bacteroidota	Bacteroidia	Bacteroidales	Bacteroidaceae	UBA4372	unclassified	unclassified	5S ribosomal RNA,5S ribosomal RNA,5S ribosomal RNA,5S ribosomal RNA,5S ribosomal RNA	20	180	2521	87508	high
megahit_FGD8_S8_L003_bin.59	MAG-0358	FGD8_S8_L003	megahit	95.72	0	2000714	79997	d__Bacteria;p__Bacteroidota;c__Bacteroidia;o__Bacteroidales;f__Rikenellaceae;g__Tidjanibacter;	Bacteria	Bacteroidota	Bacteroidia	Bacteroidales	Rikenellaceae	Tidjanibacter	unclassified	unclassified		20	41	2826	285057	high
megahit_FGD8_S8_L003_bin.63	MAG-0359	FGD8_S8_L003	megahit	92.02	3.71	2382018	20611	d__Bacteria;p__Firmicutes_A;c__Clostridia;o__Oscillospirales;f__Acutalibacteraceae;g__UBA6857;	Bacteria	Firmicutes_A	Clostridia	Oscillospirales	Acutalibacteraceae	UBA6857	unclassified	unclassified	5S ribosomal RNA	20	189	2532	64756	high
megahit_FGD8_S8_L003_bin.71	MAG-0360	FGD8_S8_L003	megahit	84.66	2.8	1298064	10226	d__Bacteria;p__Firmicutes_A;c__Clostridia;o__Oscillospirales;f__Acutalibacteraceae;	Bacteria	Firmicutes_A	Clostridia	Oscillospirales	Acutalibacteraceae	unclassified	unclassified	unclassified	5S ribosomal RNA	17	159	2522	58414	medium
megahit_FGD8_S8_L003_bin.78	MAG-0361	FGD8_S8_L003	megahit	98.08	1.46	2096067	66287	d__Bacteria;p__Bacteroidota;c__Bacteroidia;o__Bacteroidales;f__Rikenellaceae;g__Alistipes;	Bacteria	Bacteroidota	Bacteroidia	Bacteroidales	Rikenellaceae	Alistipes	unclassified	unclassified		16	43	2885	187340	high
megahit_FGD9_S9_L003_bin.30	MAG-0362	FGD9_S9_L003	megahit	85.96	4.15	3372606	20566	d__Bacteria;p__Firmicutes_A;c__Clostridia;o__Lachnospirales;f__Lachnospiraceae;g__SZUA	Bacteria	Firmicutes_A	Clostridia	Lachnospirales	Lachnospiraceae	SZUA-378	unclassified	unclassified		20	246	2548	95505	medium
megahit_FGD9_S9_L003_bin.32	MAG-0363	FGD9_S9_L003	megahit	82.78	1.01	1482933	7189	d__Bacteria;p__Firmicutes_A;c__Clostridia;o__Oscillospirales;f__Ruminococcaceae;	Bacteria	Firmicutes_A	Clostridia	Oscillospirales	Ruminococcaceae	unclassified	unclassified	unclassified	5S ribosomal RNA,5S ribosomal RNA,5S ribosomal RNA	20	238	2502	23212	medium
megahit_FGD9_S9_L003_bin.44	MAG-0364	FGD9_S9_L003	megahit	87.22	1.23	2763771	43669	d__Bacteria;p__Firmicutes_A;c__Clostridia;o__Lachnospirales;f__Lachnospiraceae;g__CAG	Bacteria	Firmicutes_A	Clostridia	Lachnospirales	Lachnospiraceae	CAG-194	unclassified	unclassified	16S ribosomal RNA (partial)	19	97	2720	149493	medium
megahit_FGD9_S9_L003_bin.45	MAG-0365	FGD9_S9_L003	megahit	95.48	2.74	2101357	53612	d__Bacteria;p__Bacteroidota;c__Bacteroidia;o__Bacteroidales;f__Paludibacteraceae;g__RF16;	Bacteria	Bacteroidota	Bacteroidia	Bacteroidales	Paludibacteraceae	RF16	unclassified	unclassified	5S ribosomal RNA,5S ribosomal RNA	20	50	2534	179857	high
megahit_FGD9_S9_L003_bin.50	MAG-0366	FGD9_S9_L003	megahit	87.19	1.01	2154740	7420	d__Bacteria;p__Firmicutes_A;c__Clostridia;o__Oscillospirales;f__Acutalibacteraceae;g__CAG	Bacteria	Firmicutes_A	Clostridia	Oscillospirales	Acutalibacteraceae	CAG-177	unclassified	unclassified	5S ribosomal RNA	20	325	2507	40166	medium
megahit_FGD9_S9_L003_bin.6	MAG-0367	FGD9_S9_L003	megahit	95.61	1.34	1828734	51906	d__Bacteria;p__Firmicutes_A;c__Clostridia;o__Oscillospirales;f__Acutalibacteraceae;g__CAG	Bacteria	Firmicutes_A	Clostridia	Oscillospirales	Acutalibacteraceae	CAG-180	unclassified	unclassified	5S ribosomal RNA,5S ribosomal RNA	20	54	2586	118366	high
megahit_GBCM1_S175_L002_bin.8	MAG-0368	GBCM1_S175_L002	megahit	85.31	1.4	1708072	24665	d__Bacteria;p__Firmicutes_A;c__Clostridia;o__UBA1212;f__UBA1255;	Bacteria	Firmicutes_A	Clostridia	UBA1212	UBA1255	unclassified	unclassified	unclassified	5S ribosomal RNA (partial),16S ribosomal RNA (partial)	20	107	2523	74238	medium
megahit_GBCM11_S172_L002_bin.14	MAG-0369	GBCM11_S172_L002	megahit	97.09	0.84	1375956	37151	d__Bacteria;p__Firmicutes_A;c__Clostridia;o__Oscillospirales;f__Acutalibacteraceae;	Bacteria	Firmicutes_A	Clostridia	Oscillospirales	Acutalibacteraceae	unclassified	unclassified	unclassified	5S ribosomal RNA	20	49	2551	77106	high
megahit_GBCM11_S172_L002_bin.15	MAG-0370	GBCM11_S172_L002	megahit	86.52	0.67	1193000	45083	d__Bacteria;p__Firmicutes_A;c__Clostridia;o__Monoglobales;	Bacteria	Firmicutes_A	Clostridia	Monoglobales	unclassified	unclassified	unclassified	unclassified	5S ribosomal RNA	19	39	2551	155554	medium
megahit_GBCM11_S172_L002_bin.20	MAG-0371	GBCM11_S172_L002	megahit	97.85	0	2116249	112647	d__Bacteria;p__Bacteroidota;c__Bacteroidia;o__Bacteroidales;f__P3;g__UBA3388;s__UBA3388	Bacteria	Bacteroidota	Bacteroidia	Bacteroidales	P3	UBA3388	UBA3388 sp002358855	unclassified	5S ribosomal RNA,5S ribosomal RNA	20	35	2610	188004	high
megahit_GBCM11_S172_L002_bin.23	MAG-0372	GBCM11_S172_L002	megahit	84.03	6.09	1760980	10596	d__Bacteria;p__Bacteroidota;c__Bacteroidia;o__Bacteroidales;f__Rikenellaceae;g__Alistipes;	Bacteria	Bacteroidota	Bacteroidia	Bacteroidales	Rikenellaceae	Alistipes	unclassified	unclassified	5S ribosomal RNA	14	217	2563	50266	medium
megahit_GBCM11_S172_L002_bin.34	MAG-0373	GBCM11_S172_L002	megahit	91.44	1.12	1304537	12172	d__Bacteria;p__Firmicutes_A;c__Clostridia;o__Oscillospirales;f__Acutalibacteraceae;	Bacteria	Firmicutes_A	Clostridia	Oscillospirales	Acutalibacteraceae	unclassified	unclassified	unclassified	5S ribosomal RNA	16	136	2500	51707	high
megahit_GBCM11_S172_L002_bin.4	MAG-0374	GBCM11_S172_L002	megahit	94.36	1.07	2268928	24004	d__Bacteria;p__Bacteroidota;c__Bacteroidia;o__Bacteroidales;f__Muribaculaceae;g__M3;	Bacteria	Bacteroidota	Bacteroidia	Bacteroidales	Muribaculaceae	M3	unclassified	unclassified	5S ribosomal RNA	20	137	2508	63466	high
megahit_GBCM2_S178_L002_bin.16	MAG-0375	GBCM2_S178_L002	megahit	100	0	2084031	85839	d__Bacteria;p__Firmicutes_A;c__Clostridia;o__Oscillospirales;f__Ruminococcaceae;g__Faecalibacterium;s__Faecalibacterium	Bacteria	Firmicutes_A	Clostridia	Oscillospirales	Ruminococcaceae	Faecalibacterium	Faecalibacterium prausnitzii_C	unclassified	5S ribosomal RNA,5S ribosomal RNA,5S ribosomal RNA,5S ribosomal RNA,5S ribosomal RNA	20	37	15495	216633	high
megahit_GBCM2_S178_L002_bin.22	MAG-0376	GBCM2_S178_L002	megahit	97.21	3.14	5833178	99567	d__Bacteria;p__Bacteroidota;c__Bacteroidia;o__Bacteroidales;f__Bacteroidaceae;g__Bacteroides;s__Bacteroides	Bacteria	Bacteroidota	Bacteroidia	Bacteroidales	Bacteroidaceae	Bacteroides	Bacteroides thetaiotaomicron	unclassified	5S ribosomal RNA,5S ribosomal RNA,5S ribosomal RNA (partial),5S ribosomal RNA (partial),5S ribosomal RNA	20	134	2543	239917	high
megahit_GBCM2_S178_L002_bin.33	MAG-0377	GBCM2_S178_L002	megahit	87.38	1.7	2597176	10544	d__Bacteria;p__Bacteroidota;c__Bacteroidia;o__Bacteroidales;f__Muribaculaceae;g__CAG	Bacteria	Bacteroidota	Bacteroidia	Bacteroidales	Muribaculaceae	CAG-279	unclassified	unclassified	5S ribosomal RNA	20	312	2521	46185	medium
megahit_GBCM2_S178_L002_bin.34	MAG-0378	GBCM2_S178_L002	megahit	90.72	0	3101200	85364	d__Bacteria;p__Bacteroidota;c__Bacteroidia;o__Bacteroidales;f__Coprobacteraceae;g__Coprobacter;s__Coprobacter	Bacteria	Bacteroidota	Bacteroidia	Bacteroidales	Coprobacteraceae	Coprobacter	Coprobacter fastidiosus	unclassified	5S ribosomal RNA,5S ribosomal RNA,5S ribosomal RNA	20	55	3204	213570	high
megahit_GBCM3_S170_L002_bin.19	MAG-0379	GBCM3_S170_L002	megahit	98.03	0.16	2040546	89193	d__Bacteria;p__Bacteroidota;c__Bacteroidia;o__Bacteroidales;f__Rikenellaceae;g__Alistipes;	Bacteria	Bacteroidota	Bacteroidia	Bacteroidales	Rikenellaceae	Alistipes	unclassified	unclassified		20	47	2874	159898	high
megahit_GBCM3_S170_L002_bin.27	MAG-0380	GBCM3_S170_L002	megahit	82.82	1.68	1218115	8657	d__Bacteria;p__Firmicutes_A;c__Clostridia;o__Oscillospirales;f__Ruminococcaceae;g__UBA11540;	Bacteria	Firmicutes_A	Clostridia	Oscillospirales	Ruminococcaceae	UBA11540	unclassified	unclassified	5S ribosomal RNA,16S ribosomal RNA (partial)	18	174	2512	33778	medium
megahit_GBCM3_S170_L002_bin.3	MAG-0381	GBCM3_S170_L002	megahit	91.38	2.79	2253995	22453	d__Bacteria;p__Bacteroidota;c__Bacteroidia;o__Bacteroidales;f__Muribaculaceae;	Bacteria	Bacteroidota	Bacteroidia	Bacteroidales	Muribaculaceae	unclassified	unclassified	unclassified	5S ribosomal RNA (partial),5S ribosomal RNA (partial),5S ribosomal RNA (partial)	20	147	2516	72073	high
megahit_GBCM3_S170_L002_bin.31	MAG-0382	GBCM3_S170_L002	megahit	91.45	0.68	2502811	36361	d__Bacteria;p__Verrucomicrobiota;c__Verrucomicrobiae;o__Verrucomicrobiales;f__Akkermansiaceae;g__Akkermansia;	Bacteria	Verrucomicrobiota	Verrucomicrobiae	Verrucomicrobiales	Akkermansiaceae	Akkermansia	unclassified	unclassified		20	105	2658	91863	high
megahit_GBCM3_S170_L002_bin.33	MAG-0383	GBCM3_S170_L002	megahit	96.69	7.32	2330275	20038	d__Bacteria;p__Bacteroidota;c__Bacteroidia;o__Bacteroidales;f__Rikenellaceae;g__Alistipes;	Bacteria	Bacteroidota	Bacteroidia	Bacteroidales	Rikenellaceae	Alistipes	unclassified	unclassified	5S ribosomal RNA,5S ribosomal RNA,5S ribosomal RNA,5S ribosomal RNA	20	166	2517	74129	medium
megahit_GBCM3_S170_L002_bin.36	MAG-0384	GBCM3_S170_L002	megahit	87.26	2.6	2424538	15682	d__Bacteria;p__Bacteroidota;c__Bacteroidia;o__Bacteroidales;f__Bacteroidaceae;	Bacteria	Bacteroidota	Bacteroidia	Bacteroidales	Bacteroidaceae	unclassified	unclassified	unclassified		16	213	2502	53395	medium
megahit_GBCM3_S170_L002_bin.42	MAG-0385	GBCM3_S170_L002	megahit	98.12	0.54	1969254	49416	d__Bacteria;p__Bacteroidota;c__Bacteroidia;o__Bacteroidales;f__P3;g__UBA3388;s__UBA3388	Bacteria	Bacteroidota	Bacteroidia	Bacteroidales	P3	UBA3388	UBA3388 sp002358835	unclassified	5S ribosomal RNA,16S ribosomal RNA,23S ribosomal RNA	20	67	2620	96383	high
megahit_GBCM3_S170_L002_bin.6	MAG-0386	GBCM3_S170_L002	megahit	91.43	0	1704999	198571	d__Bacteria;p__Bacteroidota;c__Bacteroidia;o__Bacteroidales;f__UBA932;	Bacteria	Bacteroidota	Bacteroidia	Bacteroidales	UBA932	unclassified	unclassified	unclassified	5S ribosomal RNA,5S ribosomal RNA,5S ribosomal RNA (partial),5S ribosomal RNA (partial)	20	15	8880	346649	high
megahit_GBCM3_S170_L002_bin.8	MAG-0387	GBCM3_S170_L002	megahit	82.76	1.75	2275718	8714	d__Bacteria;p__Spirochaetota;c__Spirochaetia;o__Treponematales;f__Treponemataceae;g__Treponema_F;	Bacteria	Spirochaetota	Spirochaetia	Treponematales	Treponemataceae	Treponema_F	unclassified	unclassified	5S ribosomal RNA,5S ribosomal RNA,5S ribosomal RNA	16	318	2502	39862	medium
megahit_GBCM5_S173_L002_bin.1	MAG-0388	GBCM5_S173_L002	megahit	85.52	3.45	1920132	20983	d__Bacteria;p__Bacteroidota;c__Bacteroidia;o__Bacteroidales;f__Rikenellaceae;g__Alistipes;	Bacteria	Bacteroidota	Bacteroidia	Bacteroidales	Rikenellaceae	Alistipes	unclassified	unclassified	5S ribosomal RNA	18	133	2626	80676	medium
megahit_GBCM5_S173_L002_bin.15	MAG-0389	GBCM5_S173_L002	megahit	82.08	0.87	1656976	7528	d__Bacteria;p__Bacteroidota;c__Bacteroidia;o__Bacteroidales;f__UBA932;g__UBA1232;	Bacteria	Bacteroidota	Bacteroidia	Bacteroidales	UBA932	UBA1232	unclassified	unclassified	5S ribosomal RNA	16	254	2516	30205	medium
megahit_GBCM5_S173_L002_bin.29	MAG-0390	GBCM5_S173_L002	megahit	92.09	3.03	2155208	11305	d__Bacteria;p__Bacteroidota;c__Bacteroidia;o__Bacteroidales;f__Muribaculaceae;g__M3;	Bacteria	Bacteroidota	Bacteroidia	Bacteroidales	Muribaculaceae	M3	unclassified	unclassified	5S ribosomal RNA (partial),5S ribosomal RNA (partial),5S ribosomal RNA (partial)	20	241	2503	50667	high
megahit_GBCM5_S173_L002_bin.34	MAG-0391	GBCM5_S173_L002	megahit	89.52	0.05	2216746	26247	d__Bacteria;p__Bacteroidota;c__Bacteroidia;o__Bacteroidales;f__F082;g__F082;	Bacteria	Bacteroidota	Bacteroidia	Bacteroidales	F082	F082	unclassified	unclassified		20	141	2556	73774	medium
megahit_GBCM5_S173_L002_bin.8	MAG-0392	GBCM5_S173_L002	megahit	86.04	0.96	1764727	49882	d__Bacteria;p__Bacteroidota;c__Bacteroidia;o__Bacteroidales;f__Rikenellaceae;g__Alistipes;	Bacteria	Bacteroidota	Bacteroidia	Bacteroidales	Rikenellaceae	Alistipes	unclassified	unclassified		18	63	2901	150025	medium
megahit_GBCM6_S174_L002_bin.10	MAG-0393	GBCM6_S174_L002	megahit	90.73	1.08	1837059	22635	d__Bacteria;p__Bacteroidota;c__Bacteroidia;o__Bacteroidales;f__P3;g__UBA3388;s__UBA3388	Bacteria	Bacteroidota	Bacteroidia	Bacteroidales	P3	UBA3388	UBA3388 sp002358835	unclassified		0	118	2532	76482	high
megahit_GBCM7_S176_L002_bin.10	MAG-0394	GBCM7_S176_L002	megahit	88.41	2.65	1497855	8695	d__Bacteria;p__Bacteroidota;c__Bacteroidia;o__Bacteroidales;f__UBA932;g__UBA1232;	Bacteria	Bacteroidota	Bacteroidia	Bacteroidales	UBA932	UBA1232	unclassified	unclassified		15	202	2518	40798	medium
megahit_GBCM7_S176_L002_bin.45	MAG-0395	GBCM7_S176_L002	megahit	91.44	1.68	2657774	39045	d__Bacteria;p__Firmicutes_A;c__Clostridia;o__Oscillospirales;f__Oscillospiraceae;g__CAG	Bacteria	Firmicutes_A	Clostridia	Oscillospirales	Oscillospiraceae	CAG-110	unclassified	unclassified	5S ribosomal RNA,5S ribosomal RNA,5S ribosomal RNA	20	131	2515	151600	high
megahit_GBCM7_S176_L002_bin.47	MAG-0396	GBCM7_S176_L002	megahit	91.13	3.93	2457965	21470	d__Bacteria;p__Bacteroidota;c__Bacteroidia;o__Bacteroidales;f__Bacteroidaceae;g__UBA4372;	Bacteria	Bacteroidota	Bacteroidia	Bacteroidales	Bacteroidaceae	UBA4372	unclassified	unclassified	5S ribosomal RNA	20	181	2550	69078	high
megahit_GBCM7_S176_L002_bin.61	MAG-0397	GBCM7_S176_L002	megahit	83.02	2.53	1592983	8222	d__Bacteria;p__Firmicutes_C;c__Negativicutes;o__Selenomonadales;f__Selenomonadaceae;g__Anaerovibrio;	Bacteria	Firmicutes_C	Negativicutes	Selenomonadales	Selenomonadaceae	Anaerovibrio	unclassified	unclassified	5S ribosomal RNA,5S ribosomal RNA	17	238	2505	22055	medium
megahit_GBCM7_S176_L002_bin.62	MAG-0398	GBCM7_S176_L002	megahit	85.5	1.4	2419982	10846	d__Bacteria;p__Spirochaetota;c__Spirochaetia;o__Treponematales;f__Treponemataceae;g__Treponema_D;	Bacteria	Spirochaetota	Spirochaetia	Treponematales	Treponemataceae	Treponema_D	unclassified	unclassified	5S ribosomal RNA	20	290	2504	58199	medium
megahit_GBCM8_S171_L002_bin.10	MAG-0399	GBCM8_S171_L002	megahit	91.31	8.62	2843721	14131	d__Bacteria;p__Spirochaetota;c__Spirochaetia;o__Treponematales;f__Treponemataceae;g__Treponema_D;	Bacteria	Spirochaetota	Spirochaetia	Treponematales	Treponemataceae	Treponema_D	unclassified	unclassified		20	271	2500	110748	low
megahit_GBCM8_S171_L002_bin.16	MAG-0400	GBCM8_S171_L002	megahit	95.59	1.53	2293924	38119	d__Bacteria;p__Bacteroidota;c__Bacteroidia;o__Bacteroidales;f__Muribaculaceae;g__M3;	Bacteria	Bacteroidota	Bacteroidia	Bacteroidales	Muribaculaceae	M3	unclassified	unclassified	5S ribosomal RNA	20	103	2517	84637	high
megahit_GBCM8_S171_L002_bin.25	MAG-0401	GBCM8_S171_L002	megahit	90.21	1.4	1901714	35298	d__Bacteria;p__Spirochaetota;c__Spirochaetia;o__Treponematales;f__Treponemataceae;g__Treponema_D;	Bacteria	Spirochaetota	Spirochaetia	Treponematales	Treponemataceae	Treponema_D	unclassified	unclassified	5S ribosomal RNA	19	76	2551	142298	high
megahit_GBCM8_S171_L002_bin.31	MAG-0402	GBCM8_S171_L002	megahit	83.29	4.03	1832714	8568	d__Bacteria;p__Bacteroidota;c__Bacteroidia;o__Bacteroidales;f__Muribaculaceae;	Bacteria	Bacteroidota	Bacteroidia	Bacteroidales	Muribaculaceae	unclassified	unclassified	unclassified	5S ribosomal RNA	18	264	2529	31210	medium
megahit_GBCM8_S171_L002_bin.36	MAG-0403	GBCM8_S171_L002	megahit	92.39	0.88	1337078	26159	d__Bacteria;p__Firmicutes_A;c__Clostridia;o__Oscillospirales;f__Acutalibacteraceae;	Bacteria	Firmicutes_A	Clostridia	Oscillospirales	Acutalibacteraceae	unclassified	unclassified	unclassified	5S ribosomal RNA	20	81	2539	76053	high
megahit_GBCM8_S171_L002_bin.38	MAG-0404	GBCM8_S171_L002	megahit	93.42	1.04	2213576	31567	d__Bacteria;p__Bacteroidota;c__Bacteroidia;o__Bacteroidales;f__Bacteroidaceae;g__F0040;	Bacteria	Bacteroidota	Bacteroidia	Bacteroidales	Bacteroidaceae	F0040	unclassified	unclassified	5S ribosomal RNA,5S ribosomal RNA (partial),5S ribosomal RNA,5S ribosomal RNA (partial)	19	104	2527	82839	high
megahit_GBCM8_S171_L002_bin.4	MAG-0405	GBCM8_S171_L002	megahit	95.43	5.38	2381267	20755	d__Bacteria;p__Bacteroidota;c__Bacteroidia;o__Bacteroidales;f__P3;g__UBA3388;	Bacteria	Bacteroidota	Bacteroidia	Bacteroidales	P3	UBA3388	unclassified	unclassified	5S ribosomal RNA,5S ribosomal RNA,5S ribosomal RNA,5S ribosomal RNA	20	174	2510	78758	medium
megahit_GBCM9_S169_L002_bin.14	MAG-0406	GBCM9_S169_L002	megahit	84.73	3.24	1878303	11553	d__Bacteria;p__Bacteroidota;c__Bacteroidia;o__Bacteroidales;f__P3;g__UBA3388;s__UBA3388	Bacteria	Bacteroidota	Bacteroidia	Bacteroidales	P3	UBA3388	UBA3388 sp002358855	unclassified	5S ribosomal RNA	20	213	2583	54087	medium
megahit_GBS1_S179_L002_bin.51	MAG-0407	GBS1_S179_L002	megahit	95.91	0	1934900	44490	d__Bacteria;p__Firmicutes_A;c__Clostridia;o__Oscillospirales;f__Acutalibacteraceae;g__An172;s__An172	Bacteria	Firmicutes_A	Clostridia	Oscillospirales	Acutalibacteraceae	An172	An172 sp002160515	unclassified	5S ribosomal RNA,5S ribosomal RNA	20	65	3196	132612	high
megahit_GBS2_S180_L002_bin.14	MAG-0408	GBS2_S180_L002	megahit	90.29	2.23	3954980	39286	d__Bacteria;p__Bacteroidota;c__Bacteroidia;o__Bacteroidales;f__Bacteroidaceae;g__Bacteroides_B;s__Bacteroides_B	Bacteria	Bacteroidota	Bacteroidia	Bacteroidales	Bacteroidaceae	Bacteroides_B	Bacteroides_B sp002493165	unclassified	5S ribosomal RNA (partial),5S ribosomal RNA (partial),5S ribosomal RNA,5S ribosomal RNA (partial)	20	160	2578	154933	high
megahit_GBS2_S180_L002_bin.34	MAG-0409	GBS2_S180_L002	megahit	93.04	0.63	2455234	51217	d__Bacteria;p__Firmicutes_A;c__Clostridia;o__Lachnospirales;f__Lachnospiraceae;g__Ruminococcus_A;s__Ruminococcus_A	Bacteria	Firmicutes_A	Clostridia	Lachnospirales	Lachnospiraceae	Ruminococcus_A	Ruminococcus_A sp002361775	unclassified		18	70	2534	176823	high
megahit_GBS2_S180_L002_bin.45	MAG-0410	GBS2_S180_L002	megahit	89.17	9.23	2701168	15229	d__Bacteria;p__Firmicutes_A;c__Clostridia;o__Oscillospirales;f__Oscillospiraceae;g__CAG	Bacteria	Firmicutes_A	Clostridia	Oscillospirales	Oscillospiraceae	CAG-110	unclassified	unclassified	5S ribosomal RNA	20	253	2533	40671	low
megahit_GBS2_S180_L002_bin.46	MAG-0411	GBS2_S180_L002	megahit	80.09	0.15	1923974	6219	d__Bacteria;p__Desulfobacterota_A;c__Desulfovibrionia;o__Desulfovibrionales;f__Desulfovibrionaceae;g__Desulfovibrio;	Bacteria	Desulfobacterota_A	Desulfovibrionia	Desulfovibrionales	Desulfovibrionaceae	Desulfovibrio	unclassified	unclassified		17	341	2514	22453	medium
megahit_GBS2_S180_L002_bin.62	MAG-0412	GBS2_S180_L002	megahit	99.98	2.3	2332949	79169	d__Bacteria;p__Firmicutes_C;c__Negativicutes;o__Acidaminococcales;f__Acidaminococcaceae;g__Phascolarctobacterium;s__Phascolarctobacterium	Bacteria	Firmicutes_C	Negativicutes	Acidaminococcales	Acidaminococcaceae	Phascolarctobacterium	Phascolarctobacterium faecium	unclassified	5S ribosomal RNA,5S ribosomal RNA,5S ribosomal RNA (partial),16S ribosomal RNA (partial)	20	41	6070	153466	high
megahit_GBS2_S180_L002_bin.86	MAG-0413	GBS2_S180_L002	megahit	97.32	5.31	3277826	25211	d__Bacteria;p__Firmicutes_A;c__Clostridia;o__Lachnospirales;f__Lachnospiraceae;g__Blautia;	Bacteria	Firmicutes_A	Clostridia	Lachnospirales	Lachnospiraceae	Blautia	unclassified	unclassified		17	212	2532	139453	medium
megahit_GBS2_S180_L002_bin.9	MAG-0414	GBS2_S180_L002	megahit	92.52	0	2569853	178417	d__Bacteria;p__Verrucomicrobiota;c__Verrucomicrobiae;o__Verrucomicrobiales;f__Akkermansiaceae;g__Akkermansia;	Bacteria	Verrucomicrobiota	Verrucomicrobiae	Verrucomicrobiales	Akkermansiaceae	Akkermansia	unclassified	unclassified		20	26	5023	336591	high
megahit_GBS3_S181_L002_bin.1	MAG-0415	GBS3_S181_L002	megahit	91.64	2.52	1971405	17228	d__Bacteria;p__Firmicutes_A;c__Clostridia;o__Lachnospirales;f__Anaerotignaceae;g__Anaerotignum;	Bacteria	Firmicutes_A	Clostridia	Lachnospirales	Anaerotignaceae	Anaerotignum	unclassified	unclassified		19	158	2582	43378	high
megahit_GBS3_S181_L002_bin.18	MAG-0416	GBS3_S181_L002	megahit	98.98	0	1099643	214069	d__Bacteria;p__Verrucomicrobiota_A;c__Chlamydiia;o__Chlamydiales;f__Chlamydiaceae;g__Chlamydophila;s__Chlamydophila	Bacteria	Verrucomicrobiota_A	Chlamydiia	Chlamydiales	Chlamydiaceae	Chlamydophila	Chlamydophila pecorum	unclassified	5S ribosomal RNA,23S ribosomal RNA,16S ribosomal RNA	20	8	10315	434623	high
megahit_GBS3_S181_L002_bin.51	MAG-0417	GBS3_S181_L002	megahit	82.66	0.07	1446506	9146	d__Bacteria;p__Actinobacteriota;c__Coriobacteriia;o__Coriobacteriales;f__Eggerthellaceae;	Bacteria	Actinobacteriota	Coriobacteriia	Coriobacteriales	Eggerthellaceae	unclassified	unclassified	unclassified	5S ribosomal RNA (partial),5S ribosomal RNA (partial)	16	202	2526	55341	medium
megahit_GBS4_S182_L002_bin.12	MAG-0418	GBS4_S182_L002	megahit	98.08	0.96	2263420	53123	d__Bacteria;p__Bacteroidota;c__Bacteroidia;o__Bacteroidales;f__Rikenellaceae;g__Alistipes;s__Alistipes	Bacteria	Bacteroidota	Bacteroidia	Bacteroidales	Rikenellaceae	Alistipes	Alistipes putredinis	unclassified		20	67	2511	264305	high
megahit_GBS4_S182_L002_bin.29	MAG-0419	GBS4_S182_L002	megahit	93.77	1.34	2196518	35846	d__Bacteria;p__Firmicutes_A;c__Clostridia;o__Oscillospirales;f__Oscillospiraceae;g__Flavonifractor;	Bacteria	Firmicutes_A	Clostridia	Oscillospirales	Oscillospiraceae	Flavonifractor	unclassified	unclassified	5S ribosomal RNA	16	95	2846	169740	high
megahit_GBS4_S182_L002_bin.73	MAG-0420	GBS4_S182_L002	megahit	93.4	1.06	2782590	89792	d__Bacteria;p__Firmicutes_A;c__Clostridia;o__Oscillospirales;f__Acutalibacteraceae;g__RUG806;	Bacteria	Firmicutes_A	Clostridia	Oscillospirales	Acutalibacteraceae	RUG806	unclassified	unclassified	5S ribosomal RNA,5S ribosomal RNA	18	57	2725	255589	high
megahit_GBS4_S182_L002_bin.77	MAG-0421	GBS4_S182_L002	megahit	90.1	2.65	2864343	13047	d__Bacteria;p__Firmicutes_A;c__Clostridia;o__Christensenellales;f__CAG	Bacteria	Firmicutes_A	Clostridia	Christensenellales	CAG-74	unclassified	unclassified	unclassified	5S ribosomal RNA,5S ribosomal RNA,5S ribosomal RNA	19	291	2514	52132	high
megahit_GFB1_bin.24	MAG-0422	GFB1	megahit	95.88	1.3	2454827	27928	d__Bacteria;p__Bacteroidota;c__Bacteroidia;o__Bacteroidales;f__Bacteroidaceae;g__Prevotella;	Bacteria	Bacteroidota	Bacteroidia	Bacteroidales	Bacteroidaceae	Prevotella	unclassified	unclassified		16	129	2891	64800	high
megahit_GFB1_bin.33	MAG-0423	GFB1	megahit	91.58	0.97	2390885	28317	d__Bacteria;p__Proteobacteria;c__Gammaproteobacteria;o__Burkholderiales;f__Rhodocyclaceae;g__UBA2357;	Bacteria	Proteobacteria	Gammaproteobacteria	Burkholderiales	Rhodocyclaceae	UBA2357	unclassified	unclassified		20	122	2557	65587	high
megahit_GFB1_bin.38	MAG-0424	GFB1	megahit	83.24	1.98	3234671	7738	d__Bacteria;p__Firmicutes_A;c__Clostridia;o__Clostridiales;f__Clostridiaceae;g__Clostridium_X;s__Clostridium_X	Bacteria	Firmicutes_A	Clostridia	Clostridiales	Clostridiaceae	Clostridium_X	Clostridium_X cadaveris	unclassified	5S ribosomal RNA,5S ribosomal RNA,5S ribosomal RNA,5S ribosomal RNA	20	499	2501	38191	medium
megahit_GFB1_bin.49	MAG-0425	GFB1	megahit	85.41	1.43	1773390	13121	d__Bacteria;p__Bacteroidota;c__Bacteroidia;o__Bacteroidales;f__UBA932;g__UBA1232;	Bacteria	Bacteroidota	Bacteroidia	Bacteroidales	UBA932	UBA1232	unclassified	unclassified	5S ribosomal RNA	20	185	2507	72778	medium
megahit_GFL1_bin.47	MAG-0426	GFL1	megahit	90.72	0	2690633	36251	d__Bacteria;p__Firmicutes_A;c__Clostridia;o__Oscillospirales;f__CAG	Bacteria	Firmicutes_A	Clostridia	Oscillospirales	CAG-272	Firm-07	unclassified	unclassified	5S ribosomal RNA,5S ribosomal RNA,16S ribosomal RNA,5S ribosomal RNA (partial),5S ribosomal RNA	20	108	2585	132606	high
megahit_GFL1_bin.58	MAG-0427	GFL1	megahit	86.56	5.05	2059172	14240	d__Bacteria;p__Bacteroidota;c__Bacteroidia;o__Bacteroidales;f__Paludibacteraceae;g__RF16;	Bacteria	Bacteroidota	Bacteroidia	Bacteroidales	Paludibacteraceae	RF16	unclassified	unclassified	5S ribosomal RNA	20	202	2503	59552	medium
megahit_GFL1_bin.66	MAG-0428	GFL1	megahit	86.29	0.67	1599991	14319	d__Bacteria;p__Firmicutes_A;c__Clostridia;o__Oscillospirales;f__CAG	Bacteria	Firmicutes_A	Clostridia	Oscillospirales	CAG-272	unclassified	unclassified	unclassified		17	140	2645	50614	medium
megahit_GFL1_bin.71	MAG-0429	GFL1	megahit	98.56	0	1234584	107162	d__Bacteria;p__Firmicutes;c__Bacilli;o__Izemoplasmatales;f__UBA1188;g__UBA1188;s__UBA1188	Bacteria	Firmicutes	Bacilli	Izemoplasmatales	UBA1188	UBA1188	UBA1188 sp002310135	unclassified	23S ribosomal RNA (partial),16S ribosomal RNA,5S ribosomal RNA (partial),23S ribosomal RNA (partial)	20	27	3882	230168	high
megahit_GFW1_bin.14	MAG-0430	GFW1	megahit	85.97	3.33	1646222	10363	d__Bacteria;p__Bacteroidota;c__Bacteroidia;o__Bacteroidales;f__UBA932;g__RC9;	Bacteria	Bacteroidota	Bacteroidia	Bacteroidales	UBA932	RC9	unclassified	unclassified	5S ribosomal RNA	18	207	2539	51684	medium
megahit_GFW1_bin.21	MAG-0431	GFW1	megahit	90.56	1.88	1846555	16767	d__Bacteria;p__Firmicutes_A;c__Clostridia;o__Christensenellales;f__CAG	Bacteria	Firmicutes_A	Clostridia	Christensenellales	CAG-138	UBA3792	unclassified	unclassified	5S ribosomal RNA	17	158	2536	89190	high
megahit_GFW1_bin.26	MAG-0432	GFW1	megahit	91.02	2.8	2467830	55763	d__Bacteria;p__UBP6;c__UBA1177;o__UBA1177;f__UBA1177;g__UBA1177;	Bacteria	UBP6	UBA1177	UBA1177	UBA1177	UBA1177	unclassified	unclassified	5S ribosomal RNA,23S ribosomal RNA,16S ribosomal RNA	20	70	2534	173904	high
megahit_HCN1_bin.32	MAG-0433	HCN1	megahit	86.72	2.04	2126125	12976	d__Bacteria;p__Firmicutes_A;c__Clostridia;o__Christensenellales;f__CAG	Bacteria	Firmicutes_A	Clostridia	Christensenellales	CAG-138	RUG472	unclassified	unclassified	5S ribosomal RNA	20	213	2500	60158	medium
megahit_HCN10_bin.16	MAG-0434	HCN10	megahit	92.72	1.21	1281975	43964	d__Bacteria;p__Firmicutes_A;c__Clostridia;o__4C28d	Bacteria	Firmicutes_A	Clostridia	4C28d-15	CAG-727	unclassified	unclassified	unclassified	16S ribosomal RNA	17	51	2638	97954	high
megahit_HCN10_bin.45	MAG-0435	HCN10	megahit	89.5	4	2010400	12557	d__Bacteria;p__Firmicutes_A;c__Clostridia;o__Oscillospirales;f__Oscillospiraceae;g__CAG	Bacteria	Firmicutes_A	Clostridia	Oscillospirales	Oscillospiraceae	CAG-110	unclassified	unclassified	5S ribosomal RNA (partial),5S ribosomal RNA (partial)	16	201	2576	71560	medium
megahit_HCN11_bin.1	MAG-0436	HCN11	megahit	80.91	1.68	1343827	34413	d__Bacteria;p__Firmicutes_A;c__Clostridia;o__4C28d	Bacteria	Firmicutes_A	Clostridia	4C28d-15	CAG-917	unclassified	unclassified	unclassified	23S ribosomal RNA (partial),5S ribosomal RNA,16S ribosomal RNA (partial)	20	60	2540	117755	medium
megahit_HCN11_bin.26	MAG-0437	HCN11	megahit	97.21	0.48	1852356	61144	d__Bacteria;p__Bacteroidota;c__Bacteroidia;o__Bacteroidales;f__Rikenellaceae;	Bacteria	Bacteroidota	Bacteroidia	Bacteroidales	Rikenellaceae	unclassified	unclassified	unclassified	5S ribosomal RNA,16S ribosomal RNA (partial)	19	52	2982	154803	high
megahit_HCN12_bin.10	MAG-0438	HCN12	megahit	91.86	5.24	2216514	52699	d__Bacteria;p__Bacteroidota;c__Bacteroidia;o__Bacteroidales;f__UBA932;g__RC9;	Bacteria	Bacteroidota	Bacteroidia	Bacteroidales	UBA932	RC9	unclassified	unclassified	5S ribosomal RNA (partial)	20	86	2506	160133	medium
megahit_HCN12_bin.39	MAG-0439	HCN12	megahit	90.83	0.24	1909576	14300	d__Bacteria;p__Bacteroidota;c__Bacteroidia;o__Bacteroidales;f__UBA932;	Bacteria	Bacteroidota	Bacteroidia	Bacteroidales	UBA932	unclassified	unclassified	unclassified	5S ribosomal RNA,5S ribosomal RNA (partial),5S ribosomal RNA,5S ribosomal RNA (partial)	18	172	2551	49680	high
megahit_HCN13_bin.7	MAG-0440	HCN13	megahit	92.07	2.34	1691251	21427	d__Bacteria;p__Bacteroidota;c__Bacteroidia;o__Bacteroidales;f__Rikenellaceae;g__Alistipes;	Bacteria	Bacteroidota	Bacteroidia	Bacteroidales	Rikenellaceae	Alistipes	unclassified	unclassified	5S ribosomal RNA	15	107	2971	79387	high
megahit_HCN14_bin.34	MAG-0441	HCN14	megahit	95.97	3.22	2052190	14131	d__Bacteria;p__Firmicutes_A;c__Clostridia;o__Oscillospirales;f__Acutalibacteraceae;g__Ruminococcus_E;s__Ruminococcus_E	Bacteria	Firmicutes_A	Clostridia	Oscillospirales	Acutalibacteraceae	Ruminococcus_E	Ruminococcus_E sp900316555	unclassified	5S ribosomal RNA,5S ribosomal RNA	19	196	2551	59950	high
megahit_HCN14_bin.48	MAG-0442	HCN14	megahit	82.11	1.66	1452594	12204	d__Bacteria;p__Bacteroidota;c__Bacteroidia;o__Bacteroidales;f__Paludibacteraceae;g__RUG163;	Bacteria	Bacteroidota	Bacteroidia	Bacteroidales	Paludibacteraceae	RUG163	unclassified	unclassified	5S ribosomal RNA	16	174	2508	33696	medium
megahit_HCN14_bin.59	MAG-0443	HCN14	megahit	89.58	4.09	2375460	24765	d__Bacteria;p__Bacteroidota;c__Bacteroidia;o__Bacteroidales;f__Bacteroidaceae;	Bacteria	Bacteroidota	Bacteroidia	Bacteroidales	Bacteroidaceae	unclassified	unclassified	unclassified	5S ribosomal RNA	20	143	2555	70987	medium
megahit_HCN18_bin.11	MAG-0444	HCN18	megahit	91.28	0.22	1930098	44246	d__Bacteria;p__Firmicutes_A;c__Clostridia;o__Lachnospirales;f__Lachnospiraceae;	Bacteria	Firmicutes_A	Clostridia	Lachnospirales	Lachnospiraceae	unclassified	unclassified	unclassified		19	63	2874	122945	high
megahit_HCN18_bin.18	MAG-0445	HCN18	megahit	86.53	0.05	2004074	21626	d__Bacteria;p__Bacteroidota;c__Bacteroidia;o__Bacteroidales;f__Bacteroidaceae;g__Prevotellamassilia;	Bacteria	Bacteroidota	Bacteroidia	Bacteroidales	Bacteroidaceae	Prevotellamassilia	unclassified	unclassified	5S ribosomal RNA (partial),5S ribosomal RNA (partial)	19	139	2556	68459	medium
megahit_HCN18_bin.31	MAG-0446	HCN18	megahit	81.59	0.34	1445366	14439	d__Bacteria;p__Firmicutes_A;c__Clostridia;o__Oscillospirales;f__Oscillospiraceae;g__CAG	Bacteria	Firmicutes_A	Clostridia	Oscillospirales	Oscillospiraceae	CAG-110	unclassified	unclassified		14	145	2606	54332	medium
megahit_HCN19_bin.24	MAG-0447	HCN19	megahit	84.57	1.42	1828332	10687	d__Bacteria;p__Spirochaetota;c__Spirochaetia;o__Treponematales;f__Treponemataceae;	Bacteria	Spirochaetota	Spirochaetia	Treponematales	Treponemataceae	unclassified	unclassified	unclassified	5S ribosomal RNA	18	226	2504	76396	medium
megahit_HCN19_bin.27	MAG-0448	HCN19	megahit	84.26	7.01	1997203	11628	d__Bacteria;p__Bacteroidota;c__Bacteroidia;o__Bacteroidales;f__Rikenellaceae;g__Alistipes;	Bacteria	Bacteroidota	Bacteroidia	Bacteroidales	Rikenellaceae	Alistipes	unclassified	unclassified	5S ribosomal RNA	18	232	2502	32305	low
megahit_HCN19_bin.44	MAG-0449	HCN19	megahit	82.35	1.84	1793899	17473	d__Bacteria;p__Firmicutes_A;c__Clostridia;o__Lachnospirales;f__Lachnospiraceae;g__CAG	Bacteria	Firmicutes_A	Clostridia	Lachnospirales	Lachnospiraceae	CAG-303	unclassified	unclassified	5S ribosomal RNA,16S ribosomal RNA (partial)	14	156	2514	55985	medium
megahit_HCN19_bin.50	MAG-0450	HCN19	megahit	87.64	3.93	1776671	6627	d__Bacteria;p__Firmicutes;c__Bacilli;o__RF39;f__CAG	Bacteria	Firmicutes	Bacilli	RF39	CAG-822	unclassified	unclassified	unclassified	5S ribosomal RNA (partial)	17	302	2507	57567	medium
megahit_HCN19_bin.9	MAG-0451	HCN19	megahit	87.41	2.45	2276461	21617	d__Bacteria;p__Firmicutes_A;c__Clostridia;o__Lachnospirales;f__Lachnospiraceae;g__Acetatifactor;	Bacteria	Firmicutes_A	Clostridia	Lachnospirales	Lachnospiraceae	Acetatifactor	unclassified	unclassified		16	161	2567	75393	medium
megahit_HCN2_bin.21	MAG-0452	HCN2	megahit	92.98	3.28	1809714	10837	d__Bacteria;p__Firmicutes_A;c__Clostridia;o__Christensenellales;f__CAG	Bacteria	Firmicutes_A	Clostridia	Christensenellales	CAG-138	UBA3792	unclassified	unclassified	5S ribosomal RNA	18	218	2502	30670	high
megahit_HCN2_bin.27	MAG-0453	HCN2	megahit	90.81	3.47	1413282	9800	d__Bacteria;p__Firmicutes_A;c__Clostridia;o__Oscillospirales;f__Acutalibacteraceae;	Bacteria	Firmicutes_A	Clostridia	Oscillospirales	Acutalibacteraceae	unclassified	unclassified	unclassified	5S ribosomal RNA	16	166	2580	41731	high
megahit_HCN2_bin.28	MAG-0454	HCN2	megahit	82.01	5.14	1973090	7765	d__Bacteria;p__Firmicutes_A;c__Clostridia;o__Lachnospirales;f__Lachnospiraceae;g__Acetatifactor;	Bacteria	Firmicutes_A	Clostridia	Lachnospirales	Lachnospiraceae	Acetatifactor	unclassified	unclassified	5S ribosomal RNA	14	317	2505	34529	medium
megahit_HCN2_bin.41	MAG-0455	HCN2	megahit	82.74	6.15	1949457	7117	d__Bacteria;p__Firmicutes_A;c__Clostridia;o__Oscillospirales;f__Oscillospiraceae;g__CAG	Bacteria	Firmicutes_A	Clostridia	Oscillospirales	Oscillospiraceae	CAG-110	unclassified	unclassified	5S ribosomal RNA	20	334	2505	39915	medium
megahit_HCN2_bin.8	MAG-0456	HCN2	megahit	92.28	0.71	1772226	24250	d__Bacteria;p__Bacteroidota;c__Bacteroidia;o__Bacteroidales;f__UBA932;	Bacteria	Bacteroidota	Bacteroidia	Bacteroidales	UBA932	unclassified	unclassified	unclassified	5S ribosomal RNA	20	101	2844	72200	high
megahit_HCN20_bin.10	MAG-0457	HCN20	megahit	97.51	0.64	2062429	156982	d__Bacteria;p__Bacteroidota;c__Bacteroidia;o__Bacteroidales;f__Rikenellaceae;g__Alistipes;	Bacteria	Bacteroidota	Bacteroidia	Bacteroidales	Rikenellaceae	Alistipes	unclassified	unclassified	5S ribosomal RNA	20	22	6798	252339	high
megahit_HCN20_bin.12	MAG-0458	HCN20	megahit	97.23	2.64	2041728	41880	d__Bacteria;p__Bacteroidota;c__Bacteroidia;o__Bacteroidales;f__Rikenellaceae;g__Alistipes;	Bacteria	Bacteroidota	Bacteroidia	Bacteroidales	Rikenellaceae	Alistipes	unclassified	unclassified	5S ribosomal RNA	18	78	2613	117041	high
megahit_HCN20_bin.30	MAG-0459	HCN20	megahit	86.81	0.96	1628375	8544	d__Bacteria;p__Bacteroidota;c__Bacteroidia;o__Bacteroidales;f__Rikenellaceae;g__Alistipes;	Bacteria	Bacteroidota	Bacteroidia	Bacteroidales	Rikenellaceae	Alistipes	unclassified	unclassified		10	224	2522	38708	medium
megahit_HCN20_bin.48	MAG-0460	HCN20	megahit	81.03	0	2302559	15538	d__Bacteria;p__Bacteroidota;c__Bacteroidia;o__Bacteroidales;f__Bacteroidaceae;g__UBA4372;	Bacteria	Bacteroidota	Bacteroidia	Bacteroidales	Bacteroidaceae	UBA4372	unclassified	unclassified	5S ribosomal RNA	17	195	2535	56820	medium
megahit_HCN20_bin.70	MAG-0461	HCN20	megahit	96.78	3.26	1880417	29984	d__Bacteria;p__Bacteroidota;c__Bacteroidia;o__Bacteroidales;f__Rikenellaceae;g__Alistipes;	Bacteria	Bacteroidota	Bacteroidia	Bacteroidales	Rikenellaceae	Alistipes	unclassified	unclassified		19	93	2573	87669	high
megahit_HCN21_bin.15	MAG-0462	HCN21	megahit	84.27	0.1	1198297	14076	d__Bacteria;p__Elusimicrobiota;c__Elusimicrobia;o__Elusimicrobiales;f__Elusimicrobiaceae;g__UBA1436;	Bacteria	Elusimicrobiota	Elusimicrobia	Elusimicrobiales	Elusimicrobiaceae	UBA1436	unclassified	unclassified		20	133	2539	35332	medium
megahit_HCN21_bin.20	MAG-0463	HCN21	megahit	95.49	0.29	1958770	37683	d__Bacteria;p__Proteobacteria;c__Gammaproteobacteria;o__Enterobacterales;f__Succinivibrionaceae;g__Succinivibrio;	Bacteria	Proteobacteria	Gammaproteobacteria	Enterobacterales	Succinivibrionaceae	Succinivibrio	unclassified	unclassified	5S ribosomal RNA,5S ribosomal RNA	18	83	2751	122262	high
megahit_HCN21_bin.42	MAG-0464	HCN21	megahit	96.64	1.68	3429172	37598	d__Bacteria;p__Firmicutes_A;c__Clostridia;o__Lachnospirales;f__Lachnospiraceae;g__CAG	Bacteria	Firmicutes_A	Clostridia	Lachnospirales	Lachnospiraceae	CAG-411	unclassified	unclassified		19	175	2524	105601	high
megahit_HCN21_bin.43	MAG-0465	HCN21	megahit	89.87	0.07	1245285	11421	d__Bacteria;p__Firmicutes_A;c__Clostridia;o__4C28d	Bacteria	Firmicutes_A	Clostridia	4C28d-15	CAG-727	QALS01	unclassified	unclassified	5S ribosomal RNA (partial),16S ribosomal RNA (partial),5S ribosomal RNA (partial)	16	152	2524	33294	medium
megahit_HCN22_bin.1	MAG-0466	HCN22	megahit	87.41	2.06	2610282	53358	d__Bacteria;p__Bacteroidota;c__Bacteroidia;o__Bacteroidales;f__Bacteroidaceae;g__UBA1189;	Bacteria	Bacteroidota	Bacteroidia	Bacteroidales	Bacteroidaceae	UBA1189	unclassified	unclassified	5S ribosomal RNA (partial),5S ribosomal RNA (partial),5S ribosomal RNA	18	70	3095	162123	medium
megahit_HCN22_bin.37	MAG-0467	HCN22	megahit	82.11	2.06	1609047	9396	d__Bacteria;p__Verrucomicrobiota;c__Kiritimatiellae;o__RFP12;	Bacteria	Verrucomicrobiota	Kiritimatiellae	RFP12	unclassified	unclassified	unclassified	unclassified	5S ribosomal RNA	19	213	2503	30754	medium
megahit_HCN24_bin.38	MAG-0468	HCN24	megahit	90.6	1.51	1963649	38469	d__Bacteria;p__Bacteroidota;c__Bacteroidia;o__Bacteroidales;f__UBA932;g__RC9;	Bacteria	Bacteroidota	Bacteroidia	Bacteroidales	UBA932	RC9	unclassified	unclassified	5S ribosomal RNA (partial),5S ribosomal RNA,5S ribosomal RNA (partial)	20	82	2622	100618	high
megahit_HCN24_bin.8	MAG-0469	HCN24	megahit	93.28	1.57	1614346	10207	d__Bacteria;p__Firmicutes_A;c__Clostridia;o__Oscillospirales;f__CAG	Bacteria	Firmicutes_A	Clostridia	Oscillospirales	CAG-272	unclassified	unclassified	unclassified	5S ribosomal RNA,5S ribosomal RNA	14	198	2531	42093	high
megahit_HCN24_bin.9	MAG-0470	HCN24	megahit	89.79	1.68	1659969	18901	d__Bacteria;p__Bacteroidota;c__Bacteroidia;o__Bacteroidales;f__Rikenellaceae;g__Alistipes;	Bacteria	Bacteroidota	Bacteroidia	Bacteroidales	Rikenellaceae	Alistipes	unclassified	unclassified		18	125	2662	69857	medium
megahit_HCN25_bin.38	MAG-0471	HCN25	megahit	88.47	1.34	1346287	19443	d__Bacteria;p__Firmicutes_A;c__Clostridia;o__Oscillospirales;f__Acutalibacteraceae;g__UBA737;	Bacteria	Firmicutes_A	Clostridia	Oscillospirales	Acutalibacteraceae	UBA737	unclassified	unclassified	5S ribosomal RNA	17	110	2563	86704	medium
megahit_HCN25_bin.41	MAG-0472	HCN25	megahit	94.96	2.08	1990053	21605	d__Bacteria;p__Bacteroidota;c__Bacteroidia;o__Bacteroidales;f__Rikenellaceae;g__Alistipes;	Bacteria	Bacteroidota	Bacteroidia	Bacteroidales	Rikenellaceae	Alistipes	unclassified	unclassified	5S ribosomal RNA	19	127	2533	87878	high
megahit_HCN26_bin.19	MAG-0473	HCN26	megahit	80.82	3.69	1376098	6704	d__Bacteria;p__Bacteroidota;c__Bacteroidia;o__Bacteroidales;f__Rikenellaceae;g__Alistipes;	Bacteria	Bacteroidota	Bacteroidia	Bacteroidales	Rikenellaceae	Alistipes	unclassified	unclassified		15	231	2509	22158	medium
megahit_HCN27_bin.35	MAG-0474	HCN27	megahit	96.84	1.71	1793012	58062	d__Bacteria;p__Bacteroidota;c__Bacteroidia;o__Bacteroidales;f__Rikenellaceae;g__Alistipes;	Bacteria	Bacteroidota	Bacteroidia	Bacteroidales	Rikenellaceae	Alistipes	unclassified	unclassified	5S ribosomal RNA (partial)	20	47	2971	196381	high
megahit_HCN27_bin.39	MAG-0475	HCN27	megahit	87.26	1.57	1542532	13022	d__Bacteria;p__Firmicutes_A;c__Clostridia;o__Oscillospirales;f__CAG	Bacteria	Firmicutes_A	Clostridia	Oscillospirales	CAG-272	unclassified	unclassified	unclassified	5S ribosomal RNA (partial)	17	157	2506	44519	medium
megahit_HCN27_bin.56	MAG-0476	HCN27	megahit	95.02	1.6	1924851	70084	d__Bacteria;p__Bacteroidota;c__Bacteroidia;o__Bacteroidales;f__Rikenellaceae;g__Alistipes;	Bacteria	Bacteroidota	Bacteroidia	Bacteroidales	Rikenellaceae	Alistipes	unclassified	unclassified	5S ribosomal RNA,5S ribosomal RNA	20	48	2884	132663	high
megahit_HCN27_bin.58	MAG-0477	HCN27	megahit	91.38	1.88	1964504	17633	d__Bacteria;p__Verrucomicrobiota;c__Kiritimatiellae;o__RFP12;	Bacteria	Verrucomicrobiota	Kiritimatiellae	RFP12	unclassified	unclassified	unclassified	unclassified	5S ribosomal RNA,5S ribosomal RNA,5S ribosomal RNA	20	160	2522	48584	high
megahit_HCN28_bin.27	MAG-0478	HCN28	megahit	87.46	3.43	2658807	19866	d__Bacteria;p__Bacteroidota;c__Bacteroidia;o__Bacteroidales;f__UBA932;g__RC9;	Bacteria	Bacteroidota	Bacteroidia	Bacteroidales	UBA932	RC9	unclassified	unclassified	5S ribosomal RNA,5S ribosomal RNA (partial)	18	219	2500	88786	medium
megahit_HCN29_bin.18	MAG-0479	HCN29	megahit	83.45	1.04	1635202	11290	d__Bacteria;p__Verrucomicrobiota;c__Kiritimatiellae;o__RFP12;	Bacteria	Verrucomicrobiota	Kiritimatiellae	RFP12	unclassified	unclassified	unclassified	unclassified		20	189	2603	36274	medium
megahit_HCN29_bin.30	MAG-0480	HCN29	megahit	85.75	5.91	2073940	12112	d__Bacteria;p__Bacteroidota;c__Bacteroidia;o__Bacteroidales;f__F082;g__F082;	Bacteria	Bacteroidota	Bacteroidia	Bacteroidales	F082	F082	unclassified	unclassified	5S ribosomal RNA,5S ribosomal RNA	19	228	2520	41205	medium
megahit_HCN29_bin.39	MAG-0481	HCN29	megahit	86.8	5.03	1559408	12324	d__Bacteria;p__Firmicutes_A;c__Clostridia;o__Oscillospirales;f__Acutalibacteraceae;	Bacteria	Firmicutes_A	Clostridia	Oscillospirales	Acutalibacteraceae	unclassified	unclassified	unclassified	5S ribosomal RNA	19	156	2520	60451	medium
megahit_HCN29_bin.51	MAG-0482	HCN29	megahit	81.13	2.56	2053423	12131	d__Bacteria;p__Bacteroidota;c__Bacteroidia;o__Bacteroidales;f__Bacteroidaceae;	Bacteria	Bacteroidota	Bacteroidia	Bacteroidales	Bacteroidaceae	unclassified	unclassified	unclassified		17	225	2564	43093	medium
megahit_HCN3_bin.1	MAG-0483	HCN3	megahit	84.11	0.19	2113591	70125	d__Bacteria;p__Bacteroidota;c__Bacteroidia;o__Bacteroidales;f__Muribaculaceae;g__M3;	Bacteria	Bacteroidota	Bacteroidia	Bacteroidales	Muribaculaceae	M3	unclassified	unclassified		20	59	2780	152442	medium
megahit_HCN3_bin.16	MAG-0484	HCN3	megahit	84.34	3.02	1207201	10256	d__Bacteria;p__Firmicutes_A;c__Clostridia;o__Monoglobales;f__UBA1381;	Bacteria	Firmicutes_A	Clostridia	Monoglobales	UBA1381	unclassified	unclassified	unclassified		14	151	2558	31297	medium
megahit_HCN3_bin.18	MAG-0485	HCN3	megahit	92.74	0	1896398	26890	d__Bacteria;p__Bacteroidota;c__Bacteroidia;o__Bacteroidales;f__P3;g__UBA3388;s__UBA3388	Bacteria	Bacteroidota	Bacteroidia	Bacteroidales	P3	UBA3388	UBA3388 sp002358855	unclassified	5S ribosomal RNA,5S ribosomal RNA	20	97	2566	69906	high
megahit_HCN3_bin.2	MAG-0486	HCN3	megahit	88.39	4.7	1718184	11284	d__Bacteria;p__Firmicutes_A;c__Clostridia;o__Oscillospirales;f__Oscillospiraceae;	Bacteria	Firmicutes_A	Clostridia	Oscillospirales	Oscillospiraceae	unclassified	unclassified	unclassified		16	197	2502	46600	medium
megahit_HCN3_bin.27	MAG-0487	HCN3	megahit	83.79	0.5	1294469	8204	d__Bacteria;p__Firmicutes_A;c__Clostridia;o__Oscillospirales;f__Acutalibacteraceae;	Bacteria	Firmicutes_A	Clostridia	Oscillospirales	Acutalibacteraceae	unclassified	unclassified	unclassified	5S ribosomal RNA,5S ribosomal RNA	15	190	2511	25462	medium
megahit_HCN3_bin.6	MAG-0488	HCN3	megahit	86.79	2.34	3057007	39649	d__Bacteria;p__Bacteroidota;c__Bacteroidia;o__Bacteroidales;f__Bacteroidaceae;g__UBA1189;	Bacteria	Bacteroidota	Bacteroidia	Bacteroidales	Bacteroidaceae	UBA1189	unclassified	unclassified	5S ribosomal RNA	20	142	2593	131231	medium
megahit_HCN30_bin.24	MAG-0489	HCN30	megahit	95.43	1.08	2846458	52822	d__Bacteria;p__Bacteroidota;c__Bacteroidia;o__Bacteroidales;f__F082;g__F082;	Bacteria	Bacteroidota	Bacteroidia	Bacteroidales	F082	F082	unclassified	unclassified	5S ribosomal RNA (partial)	20	106	2547	163190	high
megahit_HCN30_bin.37	MAG-0490	HCN30	megahit	90.91	0.03	1612247	9859	d__Bacteria;p__Firmicutes_A;c__Clostridia;o__4C28d	Bacteria	Firmicutes_A	Clostridia	4C28d-15	CAG-727	QALS01	unclassified	unclassified		16	202	2526	40561	high
megahit_HCN30_bin.5	MAG-0491	HCN30	megahit	95.33	1.92	1749579	85981	d__Bacteria;p__Bacteroidota;c__Bacteroidia;o__Bacteroidales;f__Rikenellaceae;g__Alistipes;	Bacteria	Bacteroidota	Bacteroidia	Bacteroidales	Rikenellaceae	Alistipes	unclassified	unclassified		20	51	3302	191649	high
megahit_HCN30_bin.6	MAG-0492	HCN30	megahit	87.51	1.1	1053796	47039	d__Bacteria;p__Proteobacteria;c__Alphaproteobacteria;o__Rs	Bacteria	Proteobacteria	Alphaproteobacteria	Rs-D84	Rs-D84	Rs-D84	unclassified	unclassified	23S ribosomal RNA (partial),16S ribosomal RNA	20	35	2928	91663	medium
megahit_HCN30_bin.9	MAG-0493	HCN30	megahit	82.08	0.38	2050803	102905	d__Bacteria;p__Bacteroidota;c__Bacteroidia;o__Bacteroidales;f__Muribaculaceae;	Bacteria	Bacteroidota	Bacteroidia	Bacteroidales	Muribaculaceae	unclassified	unclassified	unclassified	5S ribosomal RNA (partial),5S ribosomal RNA (partial),5S ribosomal RNA (partial)	19	34	3494	289837	medium
megahit_HCN31_bin.25	MAG-0494	HCN31	megahit	81.97	0.33	1056982	9279	d__Archaea;p__Halobacterota;c__Methanomicrobia;o__Methanomicrobiales;f__Methanocorpusculaceae;g__Methanocorpusculum;	Archaea	Halobacterota	Methanomicrobia	Methanomicrobiales	Methanocorpusculaceae	Methanocorpusculum	unclassified	unclassified	5S ribosomal RNA	20	148	2509	29834	medium
megahit_HCN31_bin.33	MAG-0495	HCN31	megahit	82.41	1.75	1547406	9722	d__Bacteria;p__Firmicutes_A;c__Clostridia;o__Oscillospirales;f__CAG	Bacteria	Firmicutes_A	Clostridia	Oscillospirales	CAG-272	UBA1740	unclassified	unclassified		18	209	2521	35902	medium
megahit_HCN4_bin.17	MAG-0496	HCN4	megahit	92.61	1.53	1482614	8533	d__Archaea;p__Euryarchaeota;c__Methanobacteria;o__Methanobacteriales;f__Methanobacteriaceae;g__Methanobrevibacter_A;	Archaea	Euryarchaeota	Methanobacteria	Methanobacteriales	Methanobacteriaceae	Methanobrevibacter_A	unclassified	unclassified		20	224	2500	25514	high
megahit_HCN4_bin.38	MAG-0497	HCN4	megahit	95.87	1.12	1803872	48708	d__Bacteria;p__Bacteroidota;c__Bacteroidia;o__Bacteroidales;f__Rikenellaceae;g__Alistipes;	Bacteria	Bacteroidota	Bacteroidia	Bacteroidales	Rikenellaceae	Alistipes	unclassified	unclassified		19	61	2982	101852	high
megahit_HCN5_bin.1	MAG-0498	HCN5	megahit	93.51	1.48	1904305	30047	d__Bacteria;p__Firmicutes_A;c__Clostridia;o__Oscillospirales;f__CAG	Bacteria	Firmicutes_A	Clostridia	Oscillospirales	CAG-272	UBA4717	unclassified	unclassified		20	103	2513	111552	high
megahit_HCN5_bin.54	MAG-0499	HCN5	megahit	86.74	2.01	2391159	11769	d__Bacteria;p__Firmicutes_A;c__Clostridia;o__Monoglobales;	Bacteria	Firmicutes_A	Clostridia	Monoglobales	unclassified	unclassified	unclassified	unclassified		19	262	2608	49248	medium
megahit_HCN5_bin.60	MAG-0500	HCN5	megahit	81.38	4.25	1756831	7413	d__Bacteria;p__Bacteroidota;c__Bacteroidia;o__Bacteroidales;f__UBA932;g__UBA1232;	Bacteria	Bacteroidota	Bacteroidia	Bacteroidales	UBA932	UBA1232	unclassified	unclassified	5S ribosomal RNA (partial)	16	286	2503	23883	medium
megahit_HCN5_bin.78	MAG-0501	HCN5	megahit	85.42	6.35	2344375	24869	d__Bacteria;p__Bacteroidota;c__Bacteroidia;o__Bacteroidales;f__Bacteroidaceae;g__UBA1189;	Bacteria	Bacteroidota	Bacteroidia	Bacteroidales	Bacteroidaceae	UBA1189	unclassified	unclassified		20	142	2634	81020	medium
megahit_HCN6_bin.15	MAG-0502	HCN6	megahit	93.88	0.67	1545409	25918	d__Bacteria;p__Firmicutes_A;c__Clostridia;o__Oscillospirales;f__CAG	Bacteria	Firmicutes_A	Clostridia	Oscillospirales	CAG-272	unclassified	unclassified	unclassified	5S ribosomal RNA,5S ribosomal RNA,5S ribosomal RNA,5S ribosomal RNA	18	78	2514	93617	high
megahit_HCN6_bin.30	MAG-0503	HCN6	megahit	89.63	3.38	2238581	16250	d__Bacteria;p__Firmicutes_A;c__Clostridia;o__Lachnospirales;f__Lachnospiraceae;	Bacteria	Firmicutes_A	Clostridia	Lachnospirales	Lachnospiraceae	unclassified	unclassified	unclassified		18	188	2514	107635	medium
megahit_HCN6_bin.32	MAG-0504	HCN6	megahit	89.39	0	1597638	25122	d__Bacteria;p__Firmicutes_A;c__Clostridia;o__Oscillospirales;f__Acutalibacteraceae;g__UBA737;	Bacteria	Firmicutes_A	Clostridia	Oscillospirales	Acutalibacteraceae	UBA737	unclassified	unclassified	5S ribosomal RNA,5S ribosomal RNA	17	116	2554	54028	medium
megahit_HCN6_bin.40	MAG-0505	HCN6	megahit	84.37	2.85	1299581	7993	d__Bacteria;p__Firmicutes_A;c__Clostridia;o__Oscillospirales;f__Acutalibacteraceae;	Bacteria	Firmicutes_A	Clostridia	Oscillospirales	Acutalibacteraceae	unclassified	unclassified	unclassified	5S ribosomal RNA,5S ribosomal RNA	14	193	2534	27713	medium
megahit_HCN6_bin.44	MAG-0506	HCN6	megahit	96.63	0.34	2084908	23360	d__Bacteria;p__Firmicutes_A;c__Clostridia;o__Oscillospirales;f__Acutalibacteraceae;g__DTU089_A;	Bacteria	Firmicutes_A	Clostridia	Oscillospirales	Acutalibacteraceae	DTU089_A	unclassified	unclassified	5S ribosomal RNA,5S ribosomal RNA	20	122	2612	82568	high
megahit_HCN6_bin.57	MAG-0507	HCN6	megahit	83.6	1.74	2990916	97091	d__Bacteria;p__Firmicutes_A;c__Clostridia;o__Lachnospirales;f__Lachnospiraceae;	Bacteria	Firmicutes_A	Clostridia	Lachnospirales	Lachnospiraceae	unclassified	unclassified	unclassified		18	83	2592	186431	medium
megahit_HCN7_bin.11	MAG-0508	HCN7	megahit	83.41	1.05	2223466	30312	d__Bacteria;p__Bacteroidota;c__Bacteroidia;o__Bacteroidales;f__Bacteroidaceae;g__UBA4372;	Bacteria	Bacteroidota	Bacteroidia	Bacteroidales	Bacteroidaceae	UBA4372	unclassified	unclassified	5S ribosomal RNA (partial),5S ribosomal RNA (partial),5S ribosomal RNA (partial),5S ribosomal RNA	20	101	2970	121879	medium
megahit_HCN7_bin.13	MAG-0509	HCN7	megahit	80.34	0	2225430	18255	d__Bacteria;p__Bacteroidota;c__Bacteroidia;o__Bacteroidales;f__Bacteroidaceae;g__UBA4372;	Bacteria	Bacteroidota	Bacteroidia	Bacteroidales	Bacteroidaceae	UBA4372	unclassified	unclassified	5S ribosomal RNA	19	157	2515	72393	medium
megahit_HCN7_bin.14	MAG-0510	HCN7	megahit	81.98	2.87	1854231	7575	d__Bacteria;p__Firmicutes_C;c__Negativicutes;o__Selenomonadales;f__Selenomonadaceae;g__Anaerovibrio;	Bacteria	Firmicutes_C	Negativicutes	Selenomonadales	Selenomonadaceae	Anaerovibrio	unclassified	unclassified	5S ribosomal RNA,5S ribosomal RNA	20	283	2513	31488	medium
megahit_HCN7_bin.4	MAG-0511	HCN7	megahit	94.01	0.81	3326871	26139	d__Bacteria;p__Bacteroidota;c__Bacteroidia;o__Bacteroidales;f__Paludibacteraceae;g__UBA1723;s__UBA1723	Bacteria	Bacteroidota	Bacteroidia	Bacteroidales	Paludibacteraceae	UBA1723	UBA1723 sp002371265	unclassified	5S ribosomal RNA	19	192	2536	132000	high
megahit_HCN7_bin.43	MAG-0512	HCN7	megahit	95.16	1.09	2424120	45558	d__Bacteria;p__Bacteroidota;c__Bacteroidia;o__Bacteroidales;f__F082;g__F082;	Bacteria	Bacteroidota	Bacteroidia	Bacteroidales	F082	F082	unclassified	unclassified		20	69	2509	185289	high
megahit_HCN7_bin.46	MAG-0513	HCN7	megahit	89.93	2.57	1355167	9799	d__Bacteria;p__Firmicutes_A;c__Clostridia;o__Oscillospirales;f__Acutalibacteraceae;	Bacteria	Firmicutes_A	Clostridia	Oscillospirales	Acutalibacteraceae	unclassified	unclassified	unclassified	5S ribosomal RNA,5S ribosomal RNA,5S ribosomal RNA	18	168	2528	55640	medium
megahit_HCN7_bin.58	MAG-0514	HCN7	megahit	93.61	3.61	1902176	26410	d__Bacteria;p__Bacteroidota;c__Bacteroidia;o__Bacteroidales;f__Rikenellaceae;g__Alistipes;	Bacteria	Bacteroidota	Bacteroidia	Bacteroidales	Rikenellaceae	Alistipes	unclassified	unclassified		18	107	2973	87709	high
megahit_HCN7_bin.63	MAG-0515	HCN7	megahit	91.2	5	2775236	23820	d__Bacteria;p__Bacteroidota;c__Bacteroidia;o__Bacteroidales;f__Bacteroidaceae;g__Bacteroides_B;	Bacteria	Bacteroidota	Bacteroidia	Bacteroidales	Bacteroidaceae	Bacteroides_B	unclassified	unclassified	5S ribosomal RNA,5S ribosomal RNA,5S ribosomal RNA,5S ribosomal RNA	20	180	2519	85653	high
megahit_HCN8_bin.33	MAG-0516	HCN8	megahit	87.62	0.27	1630992	17287	d__Bacteria;p__Bacteroidota;c__Bacteroidia;o__Bacteroidales;f__Paludibacteraceae;g__RF16;	Bacteria	Bacteroidota	Bacteroidia	Bacteroidales	Paludibacteraceae	RF16	unclassified	unclassified		19	156	2504	41867	medium
megahit_HCN8_bin.5	MAG-0517	HCN8	megahit	96.18	0.24	2738711	77957	d__Bacteria;p__Firmicutes_A;c__Clostridia;o__Lachnospirales;f__Lachnospiraceae;g__Agathobacter;	Bacteria	Firmicutes_A	Clostridia	Lachnospirales	Lachnospiraceae	Agathobacter	unclassified	unclassified		19	51	2601	184278	high
megahit_HCN9_bin.11	MAG-0518	HCN9	megahit	80.99	0	796844	12631	d__Bacteria;p__Proteobacteria;c__Alphaproteobacteria;o__Rs	Bacteria	Proteobacteria	Alphaproteobacteria	Rs-D84	Rs-D84	Rs-D84	unclassified	unclassified	23S ribosomal RNA	20	81	2546	51384	medium
megahit_HCN9_bin.18	MAG-0519	HCN9	megahit	83.97	1.29	1707787	15909	d__Bacteria;p__Bacteroidota;c__Bacteroidia;o__Bacteroidales;f__UBA932;g__UBA1232;	Bacteria	Bacteroidota	Bacteroidia	Bacteroidales	UBA932	UBA1232	unclassified	unclassified	5S ribosomal RNA	19	150	2513	74686	medium
megahit_HCN9_bin.21	MAG-0520	HCN9	megahit	87.93	4.85	2616428	35041	d__Bacteria;p__Bacteroidota;c__Bacteroidia;o__Bacteroidales;f__Bacteroidaceae;	Bacteria	Bacteroidota	Bacteroidia	Bacteroidales	Bacteroidaceae	unclassified	unclassified	unclassified		20	110	2919	109873	medium
megahit_HCN9_bin.29	MAG-0521	HCN9	megahit	95.74	1.04	1942866	44688	d__Bacteria;p__Bacteroidota;c__Bacteroidia;o__Bacteroidales;f__Rikenellaceae;g__Alistipes;	Bacteria	Bacteroidota	Bacteroidia	Bacteroidales	Rikenellaceae	Alistipes	unclassified	unclassified		17	72	2824	104232	high
megahit_HCN9_bin.4	MAG-0522	HCN9	megahit	85.15	7.68	1675406	9645	d__Bacteria;p__Firmicutes_A;c__Clostridia;o__Oscillospirales;f__CAG	Bacteria	Firmicutes_A	Clostridia	Oscillospirales	CAG-382	unclassified	unclassified	unclassified		14	230	2508	39546	low
megahit_HCN9_bin.73	MAG-0523	HCN9	megahit	97.58	1.09	2493739	122551	d__Bacteria;p__Bacteroidota;c__Bacteroidia;o__Bacteroidales;f__F082;g__F082;	Bacteria	Bacteroidota	Bacteroidia	Bacteroidales	F082	F082	unclassified	unclassified		20	37	3558	264683	high
megahit_HCN9_bin.83	MAG-0524	HCN9	megahit	89.24	3.43	1843883	22535	d__Bacteria;p__Firmicutes_A;c__Clostridia;o__4C28d	Bacteria	Firmicutes_A	Clostridia	4C28d-15	CAG-727	QALS01	unclassified	unclassified		14	123	2560	64351	medium
megahit_HDN1_bin.102	MAG-0525	HDN1	megahit	97.9	0	2383233	173953	d__Bacteria;p__Spirochaetota;c__Spirochaetia;o__Treponematales;f__Treponemataceae;g__Treponema_D;	Bacteria	Spirochaetota	Spirochaetia	Treponematales	Treponemataceae	Treponema_D	unclassified	unclassified	5S ribosomal RNA,16S ribosomal RNA (partial),5S ribosomal RNA	20	19	4396	612486	high
megahit_HDN1_bin.104	MAG-0526	HDN1	megahit	93.06	0.67	2415216	17133	d__Bacteria;p__Firmicutes_A;c__Clostridia;o__Oscillospirales;f__Acutalibacteraceae;g__UBA1081;	Bacteria	Firmicutes_A	Clostridia	Oscillospirales	Acutalibacteraceae	UBA1081	unclassified	unclassified	5S ribosomal RNA	16	190	2528	75832	high
megahit_HDN1_bin.106	MAG-0527	HDN1	megahit	95.09	2.18	2351269	28580	d__Bacteria;p__Firmicutes_A;c__Clostridia;o__Oscillospirales;f__Oscillospiraceae;g__Lawsonibacter;	Bacteria	Firmicutes_A	Clostridia	Oscillospirales	Oscillospiraceae	Lawsonibacter	unclassified	unclassified	5S ribosomal RNA (partial),5S ribosomal RNA (partial)	18	126	2501	84917	high
megahit_HDN1_bin.107	MAG-0528	HDN1	megahit	91.28	0.67	2028655	18470	d__Bacteria;p__Firmicutes_A;c__Clostridia;o__Lachnospirales;f__Anaerotignaceae;g__Anaerotignum;	Bacteria	Firmicutes_A	Clostridia	Lachnospirales	Anaerotignaceae	Anaerotignum	unclassified	unclassified		18	155	2562	81271	high
megahit_HDN1_bin.111	MAG-0529	HDN1	megahit	84.18	0.19	2253481	8910	d__Bacteria;p__Bacteroidota;c__Bacteroidia;o__Bacteroidales;f__Bacteroidaceae;	Bacteria	Bacteroidota	Bacteroidia	Bacteroidales	Bacteroidaceae	unclassified	unclassified	unclassified		18	307	2507	35800	medium
megahit_HDN1_bin.113	MAG-0530	HDN1	megahit	87.64	0.94	2080909	19425	d__Bacteria;p__Bacteroidota;c__Bacteroidia;o__Bacteroidales;f__Muribaculaceae;	Bacteria	Bacteroidota	Bacteroidia	Bacteroidales	Muribaculaceae	unclassified	unclassified	unclassified	5S ribosomal RNA,5S ribosomal RNA (partial)	20	155	2648	62593	medium
megahit_HDN1_bin.118	MAG-0531	HDN1	megahit	86.7	1.71	1840908	25068	d__Bacteria;p__Cyanobacteria;c__Vampirovibrionia;o__Gastranaerophilales;f__Gastranaerophilaceae;g__QAMI01;	Bacteria	Cyanobacteria	Vampirovibrionia	Gastranaerophilales	Gastranaerophilaceae	QAMI01	unclassified	unclassified		20	107	2518	67464	medium
megahit_HDN1_bin.120	MAG-0532	HDN1	megahit	93.06	1.01	1863204	105108	d__Bacteria;p__Firmicutes_A;c__Clostridia;o__Oscillospirales;f__Ruminococcaceae;	Bacteria	Firmicutes_A	Clostridia	Oscillospirales	Ruminococcaceae	unclassified	unclassified	unclassified	16S ribosomal RNA (partial),5S ribosomal RNA,5S ribosomal RNA	20	29	7747	204808	high
megahit_HDN1_bin.121	MAG-0533	HDN1	megahit	84.9	0	2037612	19925	d__Bacteria;p__Firmicutes_A;c__Clostridia;o__Oscillospirales;f__CAG	Bacteria	Firmicutes_A	Clostridia	Oscillospirales	CAG-382	unclassified	unclassified	unclassified		15	149	2652	70128	medium
megahit_HDN1_bin.15	MAG-0534	HDN1	megahit	95.33	0	1425944	18345	d__Bacteria;p__Firmicutes;c__Bacilli;o__ML615J	Bacteria	Firmicutes	Bacilli	ML615J-28	CAG-698	CAG-698	unclassified	unclassified	16S ribosomal RNA (partial),5S ribosomal RNA (partial)	20	98	2724	50599	high
megahit_HDN1_bin.16	MAG-0535	HDN1	megahit	95.46	0.02	3056086	81369	d__Bacteria;p__Bacteroidota;c__Bacteroidia;o__Bacteroidales;f__Muribaculaceae;	Bacteria	Bacteroidota	Bacteroidia	Bacteroidales	Muribaculaceae	unclassified	unclassified	unclassified		20	61	2584	157522	high
megahit_HDN1_bin.17	MAG-0536	HDN1	megahit	88.05	9.57	3886271	29169	d__Bacteria;p__Firmicutes_A;c__Clostridia;o__Lachnospirales;f__Lachnospiraceae;g__COE1;	Bacteria	Firmicutes_A	Clostridia	Lachnospirales	Lachnospiraceae	COE1	unclassified	unclassified		18	212	2527	107535	low
megahit_HDN1_bin.18	MAG-0537	HDN1	megahit	88.46	2.82	1911114	51441	d__Bacteria;p__Cyanobacteria;c__Vampirovibrionia;o__Gastranaerophilales;f__Gastranaerophilaceae;g__Zag1;	Bacteria	Cyanobacteria	Vampirovibrionia	Gastranaerophilales	Gastranaerophilaceae	Zag1	unclassified	unclassified		20	59	3362	193394	medium
megahit_HDN1_bin.2	MAG-0538	HDN1	megahit	91.22	1.36	1694460	76766	d__Bacteria;p__Firmicutes_A;c__Clostridia;o__Oscillospirales;f__CAG	Bacteria	Firmicutes_A	Clostridia	Oscillospirales	CAG-272	unclassified	unclassified	unclassified		18	33	3813	330423	high
megahit_HDN1_bin.23	MAG-0539	HDN1	megahit	99.51	0	1441968	135358	d__Bacteria;p__Campylobacterota;c__Campylobacteria;o__Campylobacterales;f__Campylobacteraceae;g__Campylobacter;	Bacteria	Campylobacterota	Campylobacteria	Campylobacterales	Campylobacteraceae	Campylobacter	unclassified	unclassified	16S ribosomal RNA	20	22	4470	183798	high
megahit_HDN1_bin.30	MAG-0540	HDN1	megahit	92.14	1.55	2525898	38489	d__Bacteria;p__Bacteroidota;c__Bacteroidia;o__Bacteroidales;f__UBA932;g__RC9;	Bacteria	Bacteroidota	Bacteroidia	Bacteroidales	UBA932	RC9	unclassified	unclassified	5S ribosomal RNA	19	118	2702	119923	high
megahit_HDN1_bin.35	MAG-0541	HDN1	megahit	90.35	7.57	3226095	65261	d__Bacteria;p__Firmicutes_A;c__Clostridia;o__Lachnospirales;f__Lachnospiraceae;	Bacteria	Firmicutes_A	Clostridia	Lachnospirales	Lachnospiraceae	unclassified	unclassified	unclassified	5S ribosomal RNA	18	119	2610	182076	medium
megahit_HDN1_bin.39	MAG-0542	HDN1	megahit	85.82	1.27	1948233	14572	d__Bacteria;p__Firmicutes_C;c__Negativicutes;o__Selenomonadales;f__Selenomonadaceae;g__Anaerovibrio;	Bacteria	Firmicutes_C	Negativicutes	Selenomonadales	Selenomonadaceae	Anaerovibrio	unclassified	unclassified		20	187	2503	32544	medium
megahit_HDN1_bin.42	MAG-0543	HDN1	megahit	82.34	0.56	3135869	56421	d__Bacteria;p__Bacteroidota;c__Bacteroidia;o__Bacteroidales;f__Bacteroidaceae;g__Paraprevotella;	Bacteria	Bacteroidota	Bacteroidia	Bacteroidales	Bacteroidaceae	Paraprevotella	unclassified	unclassified	5S ribosomal RNA,5S ribosomal RNA,5S ribosomal RNA,5S ribosomal RNA	20	95	2615	123616	medium
megahit_HDN1_bin.62	MAG-0544	HDN1	megahit	81.86	2.03	1749033	9580	d__Bacteria;p__Verrucomicrobiota;c__Verrucomicrobiae;o__Opitutales;f__CAG	Bacteria	Verrucomicrobiota	Verrucomicrobiae	Opitutales	CAG-312	CAG-312	unclassified	unclassified		18	226	2513	30244	medium
megahit_HDN1_bin.82	MAG-0545	HDN1	megahit	82.29	4.98	851970	10711	d__Bacteria;p__Firmicutes_A;c__Clostridia;o__4C28d	Bacteria	Firmicutes_A	Clostridia	4C28d-15	UBA1242	unclassified	unclassified	unclassified		13	109	2506	32739	medium
megahit_HDN1_bin.85	MAG-0546	HDN1	megahit	91.61	0.93	1227633	20764	d__Bacteria;p__Firmicutes_A;c__Clostridia;o__4C28d	Bacteria	Firmicutes_A	Clostridia	4C28d-15	DTU072	unclassified	unclassified	unclassified	5S ribosomal RNA	17	86	2517	54084	high
megahit_HDN1_bin.89	MAG-0547	HDN1	megahit	97.6	2.15	2869310	174835	d__Bacteria;p__Firmicutes_A;c__Clostridia;o__Lachnospirales;f__Lachnospiraceae;	Bacteria	Firmicutes_A	Clostridia	Lachnospirales	Lachnospiraceae	unclassified	unclassified	unclassified		19	39	3310	243752	high
megahit_HDN1_bin.91	MAG-0548	HDN1	megahit	82.67	2.67	1755294	113545	d__Bacteria;p__Firmicutes;c__Bacilli;o__ML615J	Bacteria	Firmicutes	Bacilli	ML615J-28	CAG-313	unclassified	unclassified	unclassified	5S ribosomal RNA (partial),5S ribosomal RNA (partial)	20	25	3811	169956	medium
megahit_HDN10_bin.12	MAG-0549	HDN10	megahit	80.06	1.57	1553253	5799	d__Bacteria;p__Firmicutes_A;c__Clostridia;o__Lachnospirales;f__Anaerotignaceae;	Bacteria	Firmicutes_A	Clostridia	Lachnospirales	Anaerotignaceae	unclassified	unclassified	unclassified	23S ribosomal RNA (partial)	10	289	2500	23063	medium
megahit_HDN10_bin.23	MAG-0550	HDN10	megahit	93.02	0.88	2673536	42798	d__Bacteria;p__Bacteroidota;c__Bacteroidia;o__Bacteroidales;f__Muribaculaceae;g__C941;	Bacteria	Bacteroidota	Bacteroidia	Bacteroidales	Muribaculaceae	C941	unclassified	unclassified	5S ribosomal RNA (partial),5S ribosomal RNA,5S ribosomal RNA (partial),5S ribosomal RNA,5S ribosomal RNA (partial)	20	90	3079	186272	high
megahit_HDN10_bin.27	MAG-0551	HDN10	megahit	90.05	0	2101283	12839	d__Bacteria;p__Actinobacteriota;c__Coriobacteriia;o__Coriobacteriales;f__Coriobacteriaceae;g__Collinsella;s__Collinsella	Bacteria	Actinobacteriota	Coriobacteriia	Coriobacteriales	Coriobacteriaceae	Collinsella	Collinsella tanakaei	unclassified	5S ribosomal RNA	20	226	2514	54365	high
megahit_HDN10_bin.32	MAG-0552	HDN10	megahit	90.75	2.02	1927497	16464	d__Bacteria;p__Actinobacteriota;c__Coriobacteriia;o__Coriobacteriales;f__Eggerthellaceae;g__Slackia_A;	Bacteria	Actinobacteriota	Coriobacteriia	Coriobacteriales	Eggerthellaceae	Slackia_A	unclassified	unclassified	16S ribosomal RNA (partial)	20	168	2578	76087	high
megahit_HDN10_bin.33	MAG-0553	HDN10	megahit	85.56	4.83	3437626	8505	d__Bacteria;p__Desulfobacterota_A;c__Desulfovibrionia;o__Desulfovibrionales;f__Desulfovibrionaceae;g__Bilophila;s__Bilophila	Bacteria	Desulfobacterota_A	Desulfovibrionia	Desulfovibrionales	Desulfovibrionaceae	Bilophila	Bilophila wadsworthia	unclassified		20	474	2514	43746	medium
megahit_HDN10_bin.36	MAG-0554	HDN10	megahit	83.05	2.01	2225505	16331	d__Bacteria;p__Firmicutes_A;c__Clostridia;o__Oscillospirales;f__Oscillospiraceae;g__Lawsonibacter;s__Lawsonibacter	Bacteria	Firmicutes_A	Clostridia	Oscillospirales	Oscillospiraceae	Lawsonibacter	Lawsonibacter sp000177015	unclassified	5S ribosomal RNA,5S ribosomal RNA (partial),5S ribosomal RNA (partial)	16	195	2602	52690	medium
megahit_HDN10_bin.4	MAG-0555	HDN10	megahit	96.78	1.51	2516712	26186	d__Bacteria;p__Desulfobacterota_A;c__Desulfovibrionia;o__Desulfovibrionales;f__Desulfovibrionaceae;g__Desulfovibrio;s__Desulfovibrio	Bacteria	Desulfobacterota_A	Desulfovibrionia	Desulfovibrionales	Desulfovibrionaceae	Desulfovibrio	Desulfovibrio piger	unclassified	5S ribosomal RNA,5S ribosomal RNA (partial),5S ribosomal RNA (partial),5S ribosomal RNA (partial)	20	126	2519	100272	high
megahit_HDN10_bin.45	MAG-0556	HDN10	megahit	98.92	0	1816334	60358	d__Bacteria;p__Proteobacteria;c__Alphaproteobacteria;o__RF32;f__CAG	Bacteria	Proteobacteria	Alphaproteobacteria	RF32	CAG-239	CAG-495	CAG-495 sp000432275	unclassified	5S ribosomal RNA (partial),5S ribosomal RNA (partial)	20	46	4623	271861	high
megahit_HDN10_bin.56	MAG-0557	HDN10	megahit	98.1	1.9	2626546	82031	d__Bacteria;p__Firmicutes_A;c__Clostridia;o__Lachnospirales;f__Lachnospiraceae;g__Tyzzerella;s__Tyzzerella	Bacteria	Firmicutes_A	Clostridia	Lachnospirales	Lachnospiraceae	Tyzzerella	Tyzzerella nexilis	unclassified		20	63	2539	186365	high
megahit_HDN10_bin.7	MAG-0558	HDN10	megahit	95.55	3.01	2170005	15482	d__Bacteria;p__Firmicutes;c__Bacilli;o__Erysipelotrichales;f__Erysipelotrichaceae;g__Faecalicoccus;s__Faecalicoccus	Bacteria	Firmicutes	Bacilli	Erysipelotrichales	Erysipelotrichaceae	Faecalicoccus	Faecalicoccus pleomorphus	unclassified	23S ribosomal RNA,5S ribosomal RNA (partial),5S ribosomal RNA (partial)	17	177	2518	55889	high
megahit_HDN2_bin.11	MAG-0559	HDN2	megahit	90.83	0.4	2589860	14069	d__Bacteria;p__Bacteroidota;c__Bacteroidia;o__Bacteroidales;f__Muribaculaceae;	Bacteria	Bacteroidota	Bacteroidia	Bacteroidales	Muribaculaceae	unclassified	unclassified	unclassified	16S ribosomal RNA (partial)	20	246	2549	39938	high
megahit_HDN2_bin.115	MAG-0560	HDN2	megahit	85.91	0	871542	36418	d__Bacteria;p__Firmicutes;c__Bacilli;o__RF39;f__CAG	Bacteria	Firmicutes	Bacilli	RF39	CAG-302	CAG-762	unclassified	unclassified	16S ribosomal RNA,5S ribosomal RNA (partial)	20	42	3263	76948	medium
megahit_HDN2_bin.14	MAG-0561	HDN2	megahit	98.39	0.34	2443847	212279	d__Bacteria;p__Firmicutes_A;c__Clostridia;o__Oscillospirales;f__Acutalibacteraceae;g__CAG	Bacteria	Firmicutes_A	Clostridia	Oscillospirales	Acutalibacteraceae	CAG-177	unclassified	unclassified	16S ribosomal RNA (partial),5S ribosomal RNA	20	25	8988	549471	high
megahit_HDN2_bin.17	MAG-0562	HDN2	megahit	93.56	2.29	3004045	252331	d__Bacteria;p__Firmicutes_A;c__Clostridia;o__Lachnospirales;f__Lachnospiraceae;g__Roseburia;	Bacteria	Firmicutes_A	Clostridia	Lachnospirales	Lachnospiraceae	Roseburia	unclassified	unclassified		19	30	2643	468836	high
megahit_HDN2_bin.22	MAG-0563	HDN2	megahit	92.52	0	2391464	281696	d__Bacteria;p__Verrucomicrobiota;c__Verrucomicrobiae;o__Verrucomicrobiales;f__Akkermansiaceae;g__Akkermansia;	Bacteria	Verrucomicrobiota	Verrucomicrobiae	Verrucomicrobiales	Akkermansiaceae	Akkermansia	unclassified	unclassified		20	13	5332	438378	high
megahit_HDN2_bin.25	MAG-0564	HDN2	megahit	91.64	0.19	2393972	62404	d__Bacteria;p__Bacteroidota;c__Bacteroidia;o__Bacteroidales;f__Bacteroidaceae;g__UBA4372;	Bacteria	Bacteroidota	Bacteroidia	Bacteroidales	Bacteroidaceae	UBA4372	unclassified	unclassified	5S ribosomal RNA (partial),5S ribosomal RNA,5S ribosomal RNA (partial),5S ribosomal RNA (partial)	20	40	6026	429513	high
megahit_HDN2_bin.40	MAG-0565	HDN2	megahit	83.79	9.48	4843151	41253	d__Bacteria;p__Bacteroidota;c__Bacteroidia;o__Bacteroidales;f__Bacteroidaceae;g__Bacteroides;s__Bacteroides	Bacteria	Bacteroidota	Bacteroidia	Bacteroidales	Bacteroidaceae	Bacteroides	Bacteroides uniformis	unclassified	5S ribosomal RNA (partial),5S ribosomal RNA (partial),16S ribosomal RNA (partial)	20	255	2552	156857	low
megahit_HDN2_bin.46	MAG-0566	HDN2	megahit	95.21	4.73	1787144	15867	d__Bacteria;p__Firmicutes_A;c__Clostridia;o__Oscillospirales;f__Oscillospiraceae;	Bacteria	Firmicutes_A	Clostridia	Oscillospirales	Oscillospiraceae	unclassified	unclassified	unclassified	5S ribosomal RNA,5S ribosomal RNA	17	166	2510	52455	high
megahit_HDN2_bin.51	MAG-0567	HDN2	megahit	96.49	5.81	1292142	96821	d__Bacteria;p__Firmicutes_A;c__Clostridia;o__TANB77;f__CAG	Bacteria	Firmicutes_A	Clostridia	TANB77	CAG-508	CAG-273	CAG-273 sp003507395	unclassified	5S ribosomal RNA,5S ribosomal RNA	20	22	2622	184691	medium
megahit_HDN2_bin.52	MAG-0568	HDN2	megahit	94.76	0.79	1677298	20603	d__Bacteria;p__Firmicutes_A;c__Clostridia;o__Christensenellales;f__CAG	Bacteria	Firmicutes_A	Clostridia	Christensenellales	CAG-138	unclassified	unclassified	unclassified		16	114	2570	66095	high
megahit_HDN2_bin.54	MAG-0569	HDN2	megahit	97.63	0.34	2351866	49856	d__Bacteria;p__Firmicutes_A;c__Clostridia;o__Oscillospirales;f__Acutalibacteraceae;	Bacteria	Firmicutes_A	Clostridia	Oscillospirales	Acutalibacteraceae	unclassified	unclassified	unclassified	16S ribosomal RNA (partial),5S ribosomal RNA	17	71	3000	116378	high
megahit_HDN2_bin.70	MAG-0570	HDN2	megahit	93.15	0	1427248	271668	d__Bacteria;p__Firmicutes_A;c__Clostridia;o__4C28d	Bacteria	Firmicutes_A	Clostridia	4C28d-15	UBA3700	unclassified	unclassified	unclassified	16S ribosomal RNA,5S ribosomal RNA (partial),5S ribosomal RNA (partial)	20	9	25109	365208	high
megahit_HDN2_bin.78	MAG-0571	HDN2	megahit	95.91	0	4219577	48765	d__Bacteria;p__Bacteroidota;c__Bacteroidia;o__Bacteroidales;f__Marinifilaceae;g__Butyricimonas;s__Butyricimonas	Bacteria	Bacteroidota	Bacteroidia	Bacteroidales	Marinifilaceae	Butyricimonas	Butyricimonas virosa	unclassified	5S ribosomal RNA,5S ribosomal RNA	20	110	2916	285008	high
megahit_HDN2_bin.85	MAG-0572	HDN2	megahit	98.67	1.33	2166137	89363	d__Bacteria;p__Firmicutes;c__Bacilli;o__ML615J	Bacteria	Firmicutes	Bacilli	ML615J-28	CAG-698	unclassified	unclassified	unclassified	5S ribosomal RNA (partial),5S ribosomal RNA (partial)	20	54	2648	148873	high
megahit_HDN2_bin.86	MAG-0573	HDN2	megahit	94.38	4.64	1185399	18768	d__Bacteria;p__Firmicutes;c__Bacilli;o__RF39;f__CAG	Bacteria	Firmicutes	Bacilli	RF39	CAG-302	CAG-914	CAG-914 sp000437895	unclassified	5S ribosomal RNA (partial)	20	93	2531	72011	high
megahit_HDN2_bin.90	MAG-0574	HDN2	megahit	96.08	0.26	3991640	16411	d__Bacteria;p__Bacteroidota;c__Bacteroidia;o__Bacteroidales;f__Tannerellaceae;g__Parabacteroides;s__Parabacteroides	Bacteria	Bacteroidota	Bacteroidia	Bacteroidales	Tannerellaceae	Parabacteroides	Parabacteroides distasonis	unclassified	5S ribosomal RNA,5S ribosomal RNA (partial),5S ribosomal RNA,5S ribosomal RNA,5S ribosomal RNA	20	322	2515	76825	high
megahit_HDN3_bin.110	MAG-0575	HDN3	megahit	89.56	2.43	2328347	11390	d__Bacteria;p__Firmicutes_A;c__Clostridia;o__Lachnospirales;f__Lachnospiraceae;g__CAG	Bacteria	Firmicutes_A	Clostridia	Lachnospirales	Lachnospiraceae	CAG-81	unclassified	unclassified		20	277	2506	39353	medium
megahit_HDN3_bin.113	MAG-0576	HDN3	megahit	96.27	0.29	1903879	35817	d__Bacteria;p__Proteobacteria;c__Gammaproteobacteria;o__Enterobacterales;f__Succinivibrionaceae;g__Succinivibrio;	Bacteria	Proteobacteria	Gammaproteobacteria	Enterobacterales	Succinivibrionaceae	Succinivibrio	unclassified	unclassified		20	98	2640	94985	high
megahit_HDN3_bin.15	MAG-0577	HDN3	megahit	83.59	1.57	1715960	8720	d__Bacteria;p__Firmicutes_A;c__Clostridia;o__Oscillospirales;f__Ruminococcaceae;	Bacteria	Firmicutes_A	Clostridia	Oscillospirales	Ruminococcaceae	unclassified	unclassified	unclassified		13	237	2506	28949	medium
megahit_HDN3_bin.21	MAG-0578	HDN3	megahit	87.19	1.57	1974256	54037	d__Bacteria;p__Firmicutes_A;c__Clostridia;o__Oscillospirales;f__Oscillospiraceae;g__CAG	Bacteria	Firmicutes_A	Clostridia	Oscillospirales	Oscillospiraceae	CAG-110	unclassified	unclassified	5S ribosomal RNA,5S ribosomal RNA	18	67	3151	186940	medium
megahit_HDN3_bin.24	MAG-0579	HDN3	megahit	86.13	1.79	1747859	13770	d__Bacteria;p__Firmicutes_A;c__Clostridia;o__Oscillospirales;f__Ruminococcaceae;	Bacteria	Firmicutes_A	Clostridia	Oscillospirales	Ruminococcaceae	unclassified	unclassified	unclassified	5S ribosomal RNA,5S ribosomal RNA,5S ribosomal RNA	18	168	2594	89933	medium
megahit_HDN3_bin.26	MAG-0580	HDN3	megahit	93.16	1.71	1568949	234478	d__Bacteria;p__Cyanobacteria;c__Vampirovibrionia;o__Gastranaerophilales;	Bacteria	Cyanobacteria	Vampirovibrionia	Gastranaerophilales	unclassified	unclassified	unclassified	unclassified	23S ribosomal RNA,16S ribosomal RNA,5S ribosomal RNA	20	17	3892	556649	high
megahit_HDN3_bin.3	MAG-0581	HDN3	megahit	92.57	0.68	2205026	31592	d__Bacteria;p__Verrucomicrobiota;c__Verrucomicrobiae;o__Opitutales;f__UBA953;	Bacteria	Verrucomicrobiota	Verrucomicrobiae	Opitutales	UBA953	unclassified	unclassified	unclassified		20	93	3095	90018	high
megahit_HDN3_bin.33	MAG-0582	HDN3	megahit	81.45	5.31	2285046	8054	d__Bacteria;p__Firmicutes_A;c__Clostridia;o__Lachnospirales;f__Lachnospiraceae;g__G11;	Bacteria	Firmicutes_A	Clostridia	Lachnospirales	Lachnospiraceae	G11	unclassified	unclassified		19	330	2554	46529	medium
megahit_HDN3_bin.40	MAG-0583	HDN3	megahit	81.19	2.31	3938255	27330	d__Bacteria;p__Bacteroidota;c__Bacteroidia;o__Bacteroidales;f__Tannerellaceae;g__Parabacteroides;	Bacteria	Bacteroidota	Bacteroidia	Bacteroidales	Tannerellaceae	Parabacteroides	unclassified	unclassified		20	202	2524	96958	medium
megahit_HDN3_bin.47	MAG-0584	HDN3	megahit	88.33	1.08	2087199	13441	d__Bacteria;p__Bacteroidota;c__Bacteroidia;o__Bacteroidales;f__Paludibacteraceae;	Bacteria	Bacteroidota	Bacteroidia	Bacteroidales	Paludibacteraceae	unclassified	unclassified	unclassified		16	199	2505	41613	medium
megahit_HDN3_bin.55	MAG-0585	HDN3	megahit	88.58	0.81	1420822	35416	d__Bacteria;p__Firmicutes_A;c__Clostridia;o__4C28d	Bacteria	Firmicutes_A	Clostridia	4C28d-15	DTU072	CAG-1782	unclassified	unclassified		16	66	2987	120181	medium
megahit_HDN3_bin.6	MAG-0586	HDN3	megahit	92.7	5.84	1438261	12054	d__Bacteria;p__Firmicutes;c__Bacilli;o__RFN20;	Bacteria	Firmicutes	Bacilli	RFN20	unclassified	unclassified	unclassified	unclassified	5S ribosomal RNA (partial),23S ribosomal RNA,16S ribosomal RNA	20	161	2509	55794	medium
megahit_HDN3_bin.72	MAG-0587	HDN3	megahit	90.15	1.77	2091800	57137	d__Bacteria;p__Firmicutes_C;c__Negativicutes;o__Acidaminococcales;f__Acidaminococcaceae;g__Phascolarctobacterium_A;	Bacteria	Firmicutes_C	Negativicutes	Acidaminococcales	Acidaminococcaceae	Phascolarctobacterium_A	unclassified	unclassified	5S ribosomal RNA (partial),5S ribosomal RNA (partial),5S ribosomal RNA	20	58	2747	213209	high
megahit_HDN3_bin.76	MAG-0588	HDN3	megahit	87.18	0.28	2104191	32772	d__Bacteria;p__Cyanobacteria;c__Vampirovibrionia;o__Gastranaerophilales;f__Gastranaerophilaceae;g__CAG	Bacteria	Cyanobacteria	Vampirovibrionia	Gastranaerophilales	Gastranaerophilaceae	CAG-196	CAG-196 sp002102975	unclassified	5S ribosomal RNA	20	99	2510	132884	medium
megahit_HDN3_bin.77	MAG-0589	HDN3	megahit	93.08	1.01	2203242	124732	d__Bacteria;p__Firmicutes_A;c__Clostridia;o__Oscillospirales;f__Oscillospiraceae;g__UBA738;	Bacteria	Firmicutes_A	Clostridia	Oscillospirales	Oscillospiraceae	UBA738	unclassified	unclassified	5S ribosomal RNA	20	33	3576	222844	high
megahit_HDN3_bin.95	MAG-0590	HDN3	megahit	92.95	0.22	2062356	23238	d__Bacteria;p__Firmicutes_A;c__Clostridia;o__Lachnospirales;f__Anaerotignaceae;g__Anaerotignum;	Bacteria	Firmicutes_A	Clostridia	Lachnospirales	Anaerotignaceae	Anaerotignum	unclassified	unclassified	23S ribosomal RNA	18	119	2568	88077	high
megahit_HDN3_bin.96	MAG-0591	HDN3	megahit	90.08	0.05	1668421	35730	d__Bacteria;p__Firmicutes_A;c__Clostridia;o__4C28d	Bacteria	Firmicutes_A	Clostridia	4C28d-15	CAG-727	unclassified	unclassified	unclassified		16	72	3172	98950	high
megahit_HDN4_bin.13	MAG-0592	HDN4	megahit	82.08	0	1539122	10299	d__Bacteria;p__Firmicutes_A;c__Clostridia;o__Oscillospirales;f__Acutalibacteraceae;g__CAG	Bacteria	Firmicutes_A	Clostridia	Oscillospirales	Acutalibacteraceae	CAG-180	unclassified	unclassified	5S ribosomal RNA	16	179	2500	44504	medium
megahit_HDN4_bin.19	MAG-0593	HDN4	megahit	99.52	0.96	2111401	192668	d__Bacteria;p__Bacteroidota;c__Bacteroidia;o__Bacteroidales;f__Rikenellaceae;g__Alistipes;s__Alistipes	Bacteria	Bacteroidota	Bacteroidia	Bacteroidales	Rikenellaceae	Alistipes	Alistipes putredinis	unclassified		20	17	12486	414137	high
megahit_HDN4_bin.27	MAG-0594	HDN4	megahit	91.98	0	1665316	107165	d__Bacteria;p__Bacteroidota;c__Bacteroidia;o__Bacteroidales;f__UBA932;g__RC9;	Bacteria	Bacteroidota	Bacteroidia	Bacteroidales	UBA932	RC9	unclassified	unclassified	5S ribosomal RNA (partial)	20	23	17847	235546	high
megahit_HDN4_bin.32	MAG-0595	HDN4	megahit	92.13	1.8	1361630	16977	d__Bacteria;p__Firmicutes;c__Bacilli;o__RFN20;f__CAG	Bacteria	Firmicutes	Bacilli	RFN20	CAG-826	UBA4855	unclassified	unclassified	5S ribosomal RNA (partial)	20	104	2580	66592	high
megahit_HDN4_bin.51	MAG-0596	HDN4	megahit	94.62	0	1906133	131862	d__Bacteria;p__Bacteroidota;c__Bacteroidia;o__Flavobacteriales;f__UBA1820;g__UBA1820;s__UBA1820	Bacteria	Bacteroidota	Bacteroidia	Flavobacteriales	UBA1820	UBA1820	UBA1820 sp003150615	unclassified		18	21	3931	349138	high
megahit_HDN5_bin.101	MAG-0597	HDN5	megahit	90.33	3.29	1588110	17569	d__Bacteria;p__Bacteroidota;c__Bacteroidia;o__Bacteroidales;f__Rikenellaceae;g__Alistipes;	Bacteria	Bacteroidota	Bacteroidia	Bacteroidales	Rikenellaceae	Alistipes	unclassified	unclassified	5S ribosomal RNA	16	120	2608	79266	high
megahit_HDN5_bin.103	MAG-0598	HDN5	megahit	88.8	0	1727781	14878	d__Bacteria;p__Firmicutes_A;c__Clostridia;o__Oscillospirales;f__Ruminococcaceae;	Bacteria	Firmicutes_A	Clostridia	Oscillospirales	Ruminococcaceae	unclassified	unclassified	unclassified	5S ribosomal RNA,16S ribosomal RNA (partial)	19	164	2557	49847	medium
megahit_HDN5_bin.14	MAG-0599	HDN5	megahit	98.02	2.12	1984820	26462	d__Bacteria;p__Firmicutes_C;	Bacteria	Firmicutes_C			unclassified	unclassified	unclassified	unclassified	5S ribosomal RNA,5S ribosomal RNA,5S ribosomal RNA,5S ribosomal RNA,5S ribosomal RNA	20	110	2771	69277	high
megahit_HDN5_bin.17	MAG-0600	HDN5	megahit	91.22	4.7	3019060	60759	d__Bacteria;p__Firmicutes_A;c__Clostridia;o__Lachnospirales;f__Lachnospiraceae;	Bacteria	Firmicutes_A	Clostridia	Lachnospirales	Lachnospiraceae	unclassified	unclassified	unclassified		20	77	2651	151608	high
megahit_HDN5_bin.20	MAG-0601	HDN5	megahit	94.98	1.94	4252882	35466	d__Bacteria;p__Bacteroidota;c__Bacteroidia;o__Bacteroidales;f__Bacteroidaceae;g__Bacteroides_B;s__Bacteroides_B	Bacteria	Bacteroidota	Bacteroidia	Bacteroidales	Bacteroidaceae	Bacteroides_B	Bacteroides_B sartorii	unclassified	5S ribosomal RNA,5S ribosomal RNA,5S ribosomal RNA,5S ribosomal RNA (partial),5S ribosomal RNA,5S ribosomal RNA (partial)	19	196	2550	90989	high
megahit_HDN5_bin.28	MAG-0602	HDN5	megahit	89.76	1.05	2718038	52397	d__Bacteria;p__Bacteroidota;c__Bacteroidia;o__Bacteroidales;f__Bacteroidaceae;g__Prevotella;	Bacteria	Bacteroidota	Bacteroidia	Bacteroidales	Bacteroidaceae	Prevotella	unclassified	unclassified	5S ribosomal RNA (partial),5S ribosomal RNA (partial),5S ribosomal RNA (partial),5S ribosomal RNA	19	72	3517	141769	medium
megahit_HDN5_bin.32	MAG-0603	HDN5	megahit	91.56	0.76	2455523	93095	d__Bacteria;p__Bacteroidota;c__Bacteroidia;o__Bacteroidales;f__Bacteroidaceae;	Bacteria	Bacteroidota	Bacteroidia	Bacteroidales	Bacteroidaceae	unclassified	unclassified	unclassified	5S ribosomal RNA,5S ribosomal RNA	20	39	7143	266221	high
megahit_HDN5_bin.37	MAG-0604	HDN5	megahit	89.6	3.86	2733817	27228	d__Bacteria;p__Firmicutes_A;c__Clostridia;o__Lachnospirales;f__Lachnospiraceae;g__Acetatifactor;	Bacteria	Firmicutes_A	Clostridia	Lachnospirales	Lachnospiraceae	Acetatifactor	unclassified	unclassified		20	141	2554	110906	medium
megahit_HDN5_bin.40	MAG-0605	HDN5	megahit	89.72	9.69	2673072	12327	d__Bacteria;p__Firmicutes_A;c__Clostridia;o__Lachnospirales;f__Lachnospiraceae;	Bacteria	Firmicutes_A	Clostridia	Lachnospirales	Lachnospiraceae	unclassified	unclassified	unclassified		18	279	2516	90492	low
megahit_HDN5_bin.43	MAG-0606	HDN5	megahit	95.51	5.06	1673958	26828	d__Bacteria;p__Firmicutes_C;c__Negativicutes;o__Acidaminococcales;f__Acidaminococcaceae;g__Phascolarctobacterium_A;	Bacteria	Firmicutes_C	Negativicutes	Acidaminococcales	Acidaminococcaceae	Phascolarctobacterium_A	unclassified	unclassified	5S ribosomal RNA,5S ribosomal RNA,5S ribosomal RNA,5S ribosomal RNA	18	101	2567	82530	medium
megahit_HDN5_bin.44	MAG-0607	HDN5	megahit	94.71	0.24	2014998	193579	d__Bacteria;p__Bacteroidota;c__Bacteroidia;o__Bacteroidales;f__Rikenellaceae;g__Alistipes;	Bacteria	Bacteroidota	Bacteroidia	Bacteroidales	Rikenellaceae	Alistipes	unclassified	unclassified	5S ribosomal RNA,5S ribosomal RNA	20	15	11017	411657	high
megahit_HDN5_bin.49	MAG-0608	HDN5	megahit	93.49	1.69	2828115	27763	d__Bacteria;p__Bacteroidota;c__Bacteroidia;o__Bacteroidales;f__Bacteroidaceae;g__UBA4372;	Bacteria	Bacteroidota	Bacteroidia	Bacteroidales	Bacteroidaceae	UBA4372	unclassified	unclassified	5S ribosomal RNA (partial)	19	145	3230	69899	high
megahit_HDN5_bin.66	MAG-0609	HDN5	megahit	95.91	0.48	2883763	49743	d__Bacteria;p__Bacteroidota;c__Bacteroidia;o__Bacteroidales;f__Rikenellaceae;g__Alistipes;s__Alistipes	Bacteria	Bacteroidota	Bacteroidia	Bacteroidales	Rikenellaceae	Alistipes	Alistipes senegalensis	unclassified	5S ribosomal RNA,5S ribosomal RNA	20	89	2970	151031	high
megahit_HDN5_bin.76	MAG-0610	HDN5	megahit	97.31	0.51	3245530	41642	d__Bacteria;p__Bacteroidota;c__Bacteroidia;o__Bacteroidales;f__Tannerellaceae;g__Parabacteroides;	Bacteria	Bacteroidota	Bacteroidia	Bacteroidales	Tannerellaceae	Parabacteroides	unclassified	unclassified	5S ribosomal RNA,5S ribosomal RNA (partial),5S ribosomal RNA,5S ribosomal RNA,5S ribosomal RNA	19	103	3003	104322	high
megahit_HDN5_bin.82	MAG-0611	HDN5	megahit	93.49	2.17	1851390	29931	d__Bacteria;p__Firmicutes_A;c__Clostridia;o__Oscillospirales;f__Oscillospiraceae;g__Lawsonibacter;	Bacteria	Firmicutes_A	Clostridia	Oscillospirales	Oscillospiraceae	Lawsonibacter	unclassified	unclassified	5S ribosomal RNA (partial),5S ribosomal RNA (partial),5S ribosomal RNA	20	92	2578	111803	high
megahit_HDN5_bin.83	MAG-0612	HDN5	megahit	90.37	9.29	2442381	30089	d__Bacteria;p__Bacteroidota;c__Bacteroidia;o__Bacteroidales;f__Bacteroidaceae;g__UBA4372;	Bacteria	Bacteroidota	Bacteroidia	Bacteroidales	Bacteroidaceae	UBA4372	unclassified	unclassified	23S ribosomal RNA,5S ribosomal RNA,5S ribosomal RNA	20	116	2558	89799	low
megahit_HDN5_bin.84	MAG-0613	HDN5	megahit	82.89	4.36	2074457	27541	d__Bacteria;p__Firmicutes_A;c__Clostridia;o__Oscillospirales;f__Oscillospiraceae;g__CAG	Bacteria	Firmicutes_A	Clostridia	Oscillospirales	Oscillospiraceae	CAG-110	unclassified	unclassified	5S ribosomal RNA,5S ribosomal RNA	16	109	2554	135475	medium
megahit_HDN5_bin.94	MAG-0614	HDN5	megahit	85.53	3.69	2021971	23447	d__Bacteria;p__Firmicutes_A;c__Clostridia;o__Oscillospirales;f__Oscillospiraceae;g__CAG	Bacteria	Firmicutes_A	Clostridia	Oscillospirales	Oscillospiraceae	CAG-110	unclassified	unclassified	5S ribosomal RNA,5S ribosomal RNA	19	137	2532	120116	medium
megahit_HDN6_bin.10	MAG-0615	HDN6	megahit	80.28	0.95	1624962	8791	d__Bacteria;p__Cyanobacteria;c__Vampirovibrionia;o__Gastranaerophilales;f__Gastranaerophilaceae;g__UBA6984;	Bacteria	Cyanobacteria	Vampirovibrionia	Gastranaerophilales	Gastranaerophilaceae	UBA6984	unclassified	unclassified		18	215	2549	26787	medium
megahit_HDN6_bin.11	MAG-0616	HDN6	megahit	92.13	7.67	1552610	12658	d__Bacteria;p__Firmicutes;c__Bacilli;o__RF39;f__CAG	Bacteria	Firmicutes	Bacilli	RF39	CAG-822	UBA5364	unclassified	unclassified	16S ribosomal RNA,5S ribosomal RNA (partial),23S ribosomal RNA (partial),23S ribosomal RNA (partial)	15	172	2527	52375	medium
megahit_HDN6_bin.12	MAG-0617	HDN6	megahit	94.02	1.71	1628164	260271	d__Bacteria;p__Cyanobacteria;c__Vampirovibrionia;o__Gastranaerophilales;	Bacteria	Cyanobacteria	Vampirovibrionia	Gastranaerophilales	unclassified	unclassified	unclassified	unclassified	16S ribosomal RNA,23S ribosomal RNA,5S ribosomal RNA	20	12	33201	295397	high
megahit_HDN6_bin.18	MAG-0618	HDN6	megahit	81.54	0.17	1625895	89446	d__Bacteria;p__Firmicutes_A;c__Clostridia;o__Oscillospirales;f__Ruminococcaceae;g__Ruminococcus;	Bacteria	Firmicutes_A	Clostridia	Oscillospirales	Ruminococcaceae	Ruminococcus	unclassified	unclassified		14	30	2904	195131	medium
megahit_HDN6_bin.23	MAG-0619	HDN6	megahit	92.38	0	2493505	32936	d__Bacteria;p__Bacteroidota;c__Bacteroidia;o__Bacteroidales;f__UBA932;g__RC9;	Bacteria	Bacteroidota	Bacteroidia	Bacteroidales	UBA932	RC9	unclassified	unclassified		20	112	2684	133516	high
megahit_HDN6_bin.27	MAG-0620	HDN6	megahit	94.57	0.67	1872075	24527	d__Bacteria;p__Firmicutes_A;c__Clostridia;o__Oscillospirales;f__Acutalibacteraceae;g__RUG420;	Bacteria	Firmicutes_A	Clostridia	Oscillospirales	Acutalibacteraceae	RUG420	unclassified	unclassified	5S ribosomal RNA,5S ribosomal RNA,5S ribosomal RNA	20	115	2608	130100	high
megahit_HDN6_bin.34	MAG-0621	HDN6	megahit	95.95	0	1885725	197568	d__Bacteria;p__Bacteroidota;c__Bacteroidia;o__Bacteroidales;f__UBA932;g__UBA1232;	Bacteria	Bacteroidota	Bacteroidia	Bacteroidales	UBA932	UBA1232	unclassified	unclassified		20	13	3529	328540	high
megahit_HDN6_bin.35	MAG-0622	HDN6	megahit	92.57	3.16	2626878	26915	d__Bacteria;p__Firmicutes_A;c__Clostridia;o__Lachnospirales;f__Lachnospiraceae;g__Acetatifactor;	Bacteria	Firmicutes_A	Clostridia	Lachnospirales	Lachnospiraceae	Acetatifactor	unclassified	unclassified		17	146	2587	116345	high
megahit_HDN6_bin.40	MAG-0623	HDN6	megahit	91.64	2.43	2822463	30671	d__Bacteria;p__Bacteroidota;c__Bacteroidia;o__Bacteroidales;f__Bacteroidaceae;	Bacteria	Bacteroidota	Bacteroidia	Bacteroidales	Bacteroidaceae	unclassified	unclassified	unclassified	5S ribosomal RNA,5S ribosomal RNA,5S ribosomal RNA	20	132	2650	210451	high
megahit_HDN6_bin.52	MAG-0624	HDN6	megahit	92.25	1.05	2366876	25422	d__Bacteria;p__Bacteroidota;c__Bacteroidia;o__Bacteroidales;f__UBA932;g__RC9;	Bacteria	Bacteroidota	Bacteroidia	Bacteroidales	UBA932	RC9	unclassified	unclassified		19	126	2589	92219	high
megahit_HDN6_bin.62	MAG-0625	HDN6	megahit	91.32	2.27	2237152	25207	d__Bacteria;p__Spirochaetota;c__Spirochaetia;o__Sphaerochaetales;f__Sphaerochaetaceae;	Bacteria	Spirochaetota	Spirochaetia	Sphaerochaetales	Sphaerochaetaceae	unclassified	unclassified	unclassified		18	128	2591	52940	high
megahit_HDN6_bin.63	MAG-0626	HDN6	megahit	81.18	0.81	2630013	18070	d__Bacteria;p__Bacteroidota;c__Bacteroidia;o__Bacteroidales;f__Bacteroidaceae;g__UBA4372;	Bacteria	Bacteroidota	Bacteroidia	Bacteroidales	Bacteroidaceae	UBA4372	unclassified	unclassified	5S ribosomal RNA (partial),5S ribosomal RNA (partial)	20	198	2508	83359	medium
megahit_HDN6_bin.68	MAG-0627	HDN6	megahit	81.23	4.44	1437839	9326	d__Bacteria;p__Firmicutes;c__Bacilli;o__Erysipelotrichales;f__Erysipelotrichaceae;g__UBA636;	Bacteria	Firmicutes	Bacilli	Erysipelotrichales	Erysipelotrichaceae	UBA636	unclassified	unclassified		14	193	2513	39766	medium
megahit_HDN6_bin.69	MAG-0628	HDN6	megahit	87.75	1.55	1989757	12934	d__Bacteria;p__Firmicutes_A;c__Clostridia;o__Oscillospirales;f__Oscillospiraceae;g__Lawsonibacter;	Bacteria	Firmicutes_A	Clostridia	Oscillospirales	Oscillospiraceae	Lawsonibacter	unclassified	unclassified		15	196	2508	84074	medium
megahit_HDN6_bin.81	MAG-0629	HDN6	megahit	88.74	0.77	2981378	12210	d__Bacteria;p__Bacteroidota;c__Bacteroidia;o__Bacteroidales;f__Tannerellaceae;g__Parabacteroides;	Bacteria	Bacteroidota	Bacteroidia	Bacteroidales	Tannerellaceae	Parabacteroides	unclassified	unclassified	5S ribosomal RNA (partial),5S ribosomal RNA,5S ribosomal RNA (partial),5S ribosomal RNA (partial),5S ribosomal RNA (partial)	20	340	2541	79337	medium
megahit_HDN6_bin.87	MAG-0630	HDN6	megahit	87.81	2.1	2567830	39277	d__Bacteria;p__Verrucomicrobiota;c__Kiritimatiellae;o__RFP12;f__UBA1067;g__UBA1067;	Bacteria	Verrucomicrobiota	Kiritimatiellae	RFP12	UBA1067	UBA1067	unclassified	unclassified	5S ribosomal RNA	20	105	2691	119649	medium
megahit_HDN6_bin.88	MAG-0631	HDN6	megahit	90.11	0	915950	170828	d__Bacteria;p__Proteobacteria;c__Alphaproteobacteria;o__Rs	Bacteria	Proteobacteria	Alphaproteobacteria	Rs-D84	Rs-D84	Rs-D84	unclassified	unclassified	16S ribosomal RNA,23S ribosomal RNA	20	13	10666	349302	high
megahit_HDN6_bin.9	MAG-0632	HDN6	megahit	80.35	2.57	1483195	6169	d__Bacteria;p__Firmicutes_A;c__Clostridia;o__Oscillospirales;f__Acutalibacteraceae;	Bacteria	Firmicutes_A	Clostridia	Oscillospirales	Acutalibacteraceae	unclassified	unclassified	unclassified		12	260	2532	25645	medium
megahit_HDN6_bin.92	MAG-0633	HDN6	megahit	98.6	0.9	2287774	59348	d__Bacteria;p__Firmicutes_C;c__Negativicutes;o__Acidaminococcales;f__Acidaminococcaceae;g__Phascolarctobacterium_A;	Bacteria	Firmicutes_C	Negativicutes	Acidaminococcales	Acidaminococcaceae	Phascolarctobacterium_A	unclassified	unclassified	16S ribosomal RNA,5S ribosomal RNA,5S ribosomal RNA,5S ribosomal RNA,5S ribosomal RNA (partial),5S ribosomal RNA	20	68	3389	140299	high
megahit_HDN7_bin.105	MAG-0634	HDN7	megahit	91.28	1.59	2566071	56432	d__Bacteria;p__Firmicutes_A;c__Clostridia;o__Oscillospirales;f__CAG	Bacteria	Firmicutes_A	Clostridia	Oscillospirales	CAG-272	unclassified	unclassified	unclassified	5S ribosomal RNA,5S ribosomal RNA	20	75	2710	139998	high
megahit_HDN7_bin.108	MAG-0635	HDN7	megahit	90.11	0	897439	135164	d__Bacteria;p__Proteobacteria;c__Alphaproteobacteria;o__Rs	Bacteria	Proteobacteria	Alphaproteobacteria	Rs-D84	Rs-D84	Rs-D84	unclassified	unclassified		20	11	14096	184838	high
megahit_HDN7_bin.110	MAG-0636	HDN7	megahit	81.44	1.8	1516493	5943	d__Bacteria;p__Firmicutes_C;c__Negativicutes;o__Acidaminococcales;f__Acidaminococcaceae;g__Phascolarctobacterium_A;	Bacteria	Firmicutes_C	Negativicutes	Acidaminococcales	Acidaminococcaceae	Phascolarctobacterium_A	unclassified	unclassified	5S ribosomal RNA	14	282	2512	21168	medium
megahit_HDN7_bin.25	MAG-0637	HDN7	megahit	80.94	0.54	2556022	8144	d__Bacteria;p__Bacteroidota;c__Bacteroidia;o__Bacteroidales;f__Paludibacteraceae;g__UBA1723;s__UBA1723	Bacteria	Bacteroidota	Bacteroidia	Bacteroidales	Paludibacteraceae	UBA1723	UBA1723 sp002371265	unclassified	5S ribosomal RNA	18	372	2503	33372	medium
megahit_HDN7_bin.3	MAG-0638	HDN7	megahit	93.13	4.7	1903209	47453	d__Bacteria;p__Firmicutes_A;c__Clostridia;o__Oscillospirales;f__Oscillospiraceae;g__CAG	Bacteria	Firmicutes_A	Clostridia	Oscillospirales	Oscillospiraceae	CAG-110	unclassified	unclassified	5S ribosomal RNA,5S ribosomal RNA	17	59	2580	162212	high
megahit_HDN7_bin.51	MAG-0639	HDN7	megahit	88.26	0.67	3374232	66055	d__Bacteria;p__Firmicutes_A;c__Clostridia;o__Lachnospirales;f__Lachnospiraceae;g__CAG	Bacteria	Firmicutes_A	Clostridia	Lachnospirales	Lachnospiraceae	CAG-590	unclassified	unclassified		19	114	2532	183944	medium
megahit_HDN7_bin.65	MAG-0640	HDN7	megahit	83.71	0	1040980	11453	d__Bacteria;p__Firmicutes_A;c__Clostridia;o__4C28d	Bacteria	Firmicutes_A	Clostridia	4C28d-15	UBA1242	UBA6345	unclassified	unclassified		15	127	2605	34166	medium
megahit_HDN7_bin.68	MAG-0641	HDN7	megahit	93.05	1.09	2118403	9412	d__Bacteria;p__Spirochaetota;c__Spirochaetia;o__Treponematales;f__Treponemataceae;g__Treponema_F;	Bacteria	Spirochaetota	Spirochaetia	Treponematales	Treponemataceae	Treponema_F	unclassified	unclassified	5S ribosomal RNA (partial),5S ribosomal RNA (partial),5S ribosomal RNA,5S ribosomal RNA	19	273	2506	31885	high
megahit_HDN7_bin.72	MAG-0642	HDN7	megahit	96.53	0.9	2049397	43877	d__Bacteria;p__Firmicutes_A;c__Clostridia;o__Oscillospirales;f__Oscillospiraceae;g__CAG	Bacteria	Firmicutes_A	Clostridia	Oscillospirales	Oscillospiraceae	CAG-110	unclassified	unclassified	5S ribosomal RNA,5S ribosomal RNA (partial),5S ribosomal RNA (partial)	20	78	2575	202997	high
megahit_HDN7_bin.77	MAG-0643	HDN7	megahit	84.52	1.15	2210178	66250	d__Bacteria;p__Bacteroidota;c__Bacteroidia;o__Bacteroidales;f__UBA932;g__RC9;	Bacteria	Bacteroidota	Bacteroidia	Bacteroidales	UBA932	RC9	unclassified	unclassified		20	58	2688	201476	medium
megahit_HDN7_bin.85	MAG-0644	HDN7	megahit	87.25	2.81	1851779	81017	d__Bacteria;p__Firmicutes_A;c__Clostridia;o__Oscillospirales;f__CAG	Bacteria	Firmicutes_A	Clostridia	Oscillospirales	CAG-272	UBA1740	unclassified	unclassified		19	39	4507	194165	medium
megahit_HDN7_bin.96	MAG-0645	HDN7	megahit	94.35	1.34	2399347	33441	d__Bacteria;p__Firmicutes_A;c__Clostridia;o__Oscillospirales;f__Acutalibacteraceae;g__UBA1081;	Bacteria	Firmicutes_A	Clostridia	Oscillospirales	Acutalibacteraceae	UBA1081	unclassified	unclassified	5S ribosomal RNA	20	101	2667	108606	high
megahit_HDN8_bin.18	MAG-0646	HDN8	megahit	97.68	1.34	2058500	32763	d__Bacteria;p__Firmicutes_A;c__Clostridia;o__Oscillospirales;f__Oscillospiraceae;	Bacteria	Firmicutes_A	Clostridia	Oscillospirales	Oscillospiraceae	unclassified	unclassified	unclassified	5S ribosomal RNA,5S ribosomal RNA,5S ribosomal RNA,5S ribosomal RNA	20	95	2799	88170	high
megahit_HDN8_bin.19	MAG-0647	HDN8	megahit	98.18	2.32	3656041	30125	d__Bacteria;p__Firmicutes_A;c__Clostridia;o__Lachnospirales;f__Lachnospiraceae;g__Clostridium_M;	Bacteria	Firmicutes_A	Clostridia	Lachnospirales	Lachnospiraceae	Clostridium_M	unclassified	unclassified		20	204	2518	147405	high
megahit_HDN8_bin.3	MAG-0648	HDN8	megahit	96.25	0.62	2248115	188480	d__Bacteria;p__Proteobacteria;c__Gammaproteobacteria;o__Burkholderiales;f__Burkholderiaceae;g__Duodenibacillus;	Bacteria	Proteobacteria	Gammaproteobacteria	Burkholderiales	Burkholderiaceae	Duodenibacillus	unclassified	unclassified	16S ribosomal RNA (partial),5S ribosomal RNA,5S ribosomal RNA	20	19	13158	444426	high
megahit_HDN8_bin.33	MAG-0649	HDN8	megahit	97.45	0.32	2888777	68076	d__Bacteria;p__Firmicutes_A;c__Clostridia;o__Lachnospirales;f__Lachnospiraceae;g__CAG	Bacteria	Firmicutes_A	Clostridia	Lachnospirales	Lachnospiraceae	CAG-81	CAG-81 sp900066785	unclassified		20	77	2845	184519	high
megahit_HDN8_bin.36	MAG-0650	HDN8	megahit	96.2	0	2583578	39003	d__Bacteria;p__Firmicutes_A;c__Clostridia;o__Lachnospirales;f__Lachnospiraceae;g__Clostridium_Q;s__Clostridium_Q	Bacteria	Firmicutes_A	Clostridia	Lachnospirales	Lachnospiraceae	Clostridium_Q	Clostridium_Q sp003024715	unclassified		20	121	2522	152779	high
megahit_HDN8_bin.37	MAG-0651	HDN8	megahit	84.04	3.24	2088146	11166	d__Bacteria;p__Firmicutes_A;c__Clostridia;o__Oscillospirales;f__Oscillospiraceae;g__Lawsonibacter;s__Lawsonibacter	Bacteria	Firmicutes_A	Clostridia	Oscillospirales	Oscillospiraceae	Lawsonibacter	Lawsonibacter sp000177015	unclassified	5S ribosomal RNA	17	239	2550	62834	medium
megahit_HDN8_bin.39	MAG-0652	HDN8	megahit	81.72	3.81	1954362	9230	d__Bacteria;p__Firmicutes_A;c__Clostridia;o__Oscillospirales;f__Oscillospiraceae;g__Oscillibacter;	Bacteria	Firmicutes_A	Clostridia	Oscillospirales	Oscillospiraceae	Oscillibacter	unclassified	unclassified		11	257	2507	32536	medium
megahit_HDN8_bin.45	MAG-0653	HDN8	megahit	80.96	1.31	2004286	12292	d__Bacteria;p__Cyanobacteria;c__Vampirovibrionia;o__Gastranaerophilales;f__Gastranaerophilaceae;g__CAG	Bacteria	Cyanobacteria	Vampirovibrionia	Gastranaerophilales	Gastranaerophilaceae	CAG-196	unclassified	unclassified		17	219	2510	36208	medium
megahit_HDN8_bin.49	MAG-0654	HDN8	megahit	83.33	0.41	2865025	52577	d__Bacteria;p__Bacteroidota;c__Bacteroidia;o__Bacteroidales;f__Tannerellaceae;g__Parabacteroides;s__Parabacteroides	Bacteria	Bacteroidota	Bacteroidia	Bacteroidales	Tannerellaceae	Parabacteroides	Parabacteroides sp000436495	unclassified	5S ribosomal RNA (partial),5S ribosomal RNA,5S ribosomal RNA (partial),5S ribosomal RNA (partial),5S ribosomal RNA (partial)	18	83	2550	164240	medium
megahit_HDN8_bin.5	MAG-0655	HDN8	megahit	88.03	2.56	1971391	54900	d__Bacteria;p__Cyanobacteria;c__Vampirovibrionia;o__Gastranaerophilales;f__Gastranaerophilaceae;g__Zag1;	Bacteria	Cyanobacteria	Vampirovibrionia	Gastranaerophilales	Gastranaerophilaceae	Zag1	unclassified	unclassified		20	58	2894	167624	medium
megahit_HDN9_bin.10	MAG-0656	HDN9	megahit	91.64	2.22	2429272	14048	d__Bacteria;p__Firmicutes_A;c__Clostridia;o__Lachnospirales;f__Lachnospiraceae;g__Blautia_A;	Bacteria	Firmicutes_A	Clostridia	Lachnospirales	Lachnospiraceae	Blautia_A	unclassified	unclassified		11	239	2563	40403	high
megahit_HDN9_bin.22	MAG-0657	HDN9	megahit	90.77	6.38	2884107	12802	d__Bacteria;p__Firmicutes_A;c__Clostridia;o__Oscillospirales;f__Oscillospiraceae;g__Flavonifractor;s__Flavonifractor	Bacteria	Firmicutes_A	Clostridia	Oscillospirales	Oscillospiraceae	Flavonifractor	Flavonifractor plautii	unclassified		15	294	2501	51426	medium
megahit_HDN9_bin.3	MAG-0658	HDN9	megahit	96.6	3.51	2959218	70462	d__Bacteria;p__Firmicutes_A;c__Clostridia;o__Lachnospirales;f__Lachnospiraceae;g__UBA9502;	Bacteria	Firmicutes_A	Clostridia	Lachnospirales	Lachnospiraceae	UBA9502	unclassified	unclassified		19	66	2632	254272	high
megahit_HDN9_bin.30	MAG-0659	HDN9	megahit	87.46	2.22	2633541	11350	d__Bacteria;p__Firmicutes_A;c__Clostridia;o__Lachnospirales;f__Lachnospiraceae;g__Lachnoclostridium_A;	Bacteria	Firmicutes_A	Clostridia	Lachnospirales	Lachnospiraceae	Lachnoclostridium_A	unclassified	unclassified		16	300	2500	45185	medium
megahit_HDN9_bin.32	MAG-0660	HDN9	megahit	95.79	0.19	2898952	73982	d__Bacteria;p__Bacteroidota;c__Bacteroidia;o__Bacteroidales;f__Bacteroidaceae;g__UBA4372;	Bacteria	Bacteroidota	Bacteroidia	Bacteroidales	Bacteroidaceae	UBA4372	unclassified	unclassified	5S ribosomal RNA,5S ribosomal RNA	20	54	7826	275517	high
megahit_HDN9_bin.38	MAG-0661	HDN9	megahit	93.65	0	1800702	32141	d__Bacteria;p__Proteobacteria;c__Gammaproteobacteria;o__Burkholderiales;f__Burkholderiaceae;g__CAG	Bacteria	Proteobacteria	Gammaproteobacteria	Burkholderiales	Burkholderiaceae	CAG-521	unclassified	unclassified	5S ribosomal RNA,5S ribosomal RNA,5S ribosomal RNA,16S ribosomal RNA,23S ribosomal RNA (partial)	20	84	2722	144447	high
megahit_HDN9_bin.47	MAG-0662	HDN9	megahit	95.96	0.01	4528461	150033	d__Bacteria;p__Bacteroidota;c__Bacteroidia;o__Bacteroidales;f__Tannerellaceae;g__Parabacteroides;s__Parabacteroides	Bacteria	Bacteroidota	Bacteroidia	Bacteroidales	Tannerellaceae	Parabacteroides	Parabacteroides distasonis	unclassified	5S ribosomal RNA,5S ribosomal RNA,5S ribosomal RNA,5S ribosomal RNA	20	51	3352	428603	high
megahit_HDN9_bin.51	MAG-0663	HDN9	megahit	81.38	2.39	1874312	7581	d__Bacteria;p__Firmicutes_A;c__Clostridia;o__Lachnospirales;f__Lachnospiraceae;g__Faecalicatena;s__Faecalicatena	Bacteria	Firmicutes_A	Clostridia	Lachnospirales	Lachnospiraceae	Faecalicatena	Faecalicatena sp002320245	unclassified		13	288	2506	29378	medium
megahit_HDN9_bin.52	MAG-0664	HDN9	megahit	97.83	0.67	2442161	70442	d__Bacteria;p__Firmicutes_A;c__Clostridia;o__Oscillospirales;f__Oscillospiraceae;g__Oscillibacter;	Bacteria	Firmicutes_A	Clostridia	Oscillospirales	Oscillospiraceae	Oscillibacter	unclassified	unclassified	5S ribosomal RNA	20	52	2653	194225	high
megahit_HDN9_bin.70	MAG-0665	HDN9	megahit	95.86	0.59	2381324	37398	d__Bacteria;p__Desulfobacterota_A;c__Desulfovibrionia;o__Desulfovibrionales;f__Desulfovibrionaceae;g__Desulfovibrio;s__Desulfovibrio	Bacteria	Desulfobacterota_A	Desulfovibrionia	Desulfovibrionales	Desulfovibrionaceae	Desulfovibrio	Desulfovibrio piger	unclassified		20	91	3249	181552	high
megahit_KCN10_bin.13	MAG-0666	KCN10	megahit	82.38	0.97	1391866	11849	d__Bacteria;p__Bacteroidota;c__Bacteroidia;o__Bacteroidales;f__Paludibacteraceae;g__RUG163;	Bacteria	Bacteroidota	Bacteroidia	Bacteroidales	Paludibacteraceae	RUG163	unclassified	unclassified	5S ribosomal RNA	15	152	2538	44998	medium
megahit_KCN11_bin.10	MAG-0667	KCN11	megahit	87.76	1.97	2437799	12701	d__Bacteria;p__Firmicutes_A;c__Clostridia;o__Oscillospirales;f__CAG	Bacteria	Firmicutes_A	Clostridia	Oscillospirales	CAG-272	QALR01	unclassified	unclassified		17	265	2515	51720	medium
megahit_KCN11_bin.103	MAG-0668	KCN11	megahit	94.21	2.42	1871817	12412	d__Bacteria;p__Firmicutes_A;c__Clostridia;o__Oscillospirales;f__CAG	Bacteria	Firmicutes_A	Clostridia	Oscillospirales	CAG-272	Firm-07	unclassified	unclassified		17	181	2524	53492	high
megahit_KCN11_bin.106	MAG-0669	KCN11	megahit	91.04	4.14	2317573	58638	d__Bacteria;p__Bacteroidota;c__Bacteroidia;o__Bacteroidales;f__Bacteroidaceae;	Bacteria	Bacteroidota	Bacteroidia	Bacteroidales	Bacteroidaceae	unclassified	unclassified	unclassified		19	75	2859	136994	high
megahit_KCN11_bin.15	MAG-0670	KCN11	megahit	98.88	1.44	2124079	136618	d__Bacteria;p__Bacteroidota;c__Bacteroidia;o__Bacteroidales;f__Rikenellaceae;g__Alistipes;	Bacteria	Bacteroidota	Bacteroidia	Bacteroidales	Rikenellaceae	Alistipes	unclassified	unclassified		20	28	8248	288689	high
megahit_KCN11_bin.18	MAG-0671	KCN11	megahit	96.88	1.48	2376615	32230	d__Bacteria;p__Firmicutes_A;c__Clostridia;o__Oscillospirales;f__CAG	Bacteria	Firmicutes_A	Clostridia	Oscillospirales	CAG-272	CAG-448	unclassified	unclassified		20	116	2641	79053	high
megahit_KCN11_bin.19	MAG-0672	KCN11	megahit	87.47	0.56	1245423	9902	d__Bacteria;p__Firmicutes_A;c__Clostridia;o__Oscillospirales;f__Acutalibacteraceae;	Bacteria	Firmicutes_A	Clostridia	Oscillospirales	Acutalibacteraceae	unclassified	unclassified	unclassified	5S ribosomal RNA,5S ribosomal RNA	20	160	2620	31495	medium
megahit_KCN11_bin.20	MAG-0673	KCN11	megahit	85.37	3.01	1828620	10371	d__Bacteria;p__Firmicutes_A;c__Clostridia;o__Oscillospirales;f__CAG	Bacteria	Firmicutes_A	Clostridia	Oscillospirales	CAG-272	Firm-07	unclassified	unclassified		14	224	2528	48524	medium
megahit_KCN11_bin.30	MAG-0674	KCN11	megahit	87.36	1.36	1865399	24218	d__Bacteria;p__Firmicutes_A;c__Clostridia;o__Oscillospirales;f__CAG	Bacteria	Firmicutes_A	Clostridia	Oscillospirales	CAG-272	unclassified	unclassified	unclassified	16S ribosomal RNA (partial),23S ribosomal RNA (partial),5S ribosomal RNA,5S ribosomal RNA	18	117	2648	95142	medium
megahit_KCN11_bin.39	MAG-0675	KCN11	megahit	82.75	3.41	1288985	10774	d__Bacteria;p__Firmicutes_A;c__Clostridia;o__Oscillospirales;f__CAG	Bacteria	Firmicutes_A	Clostridia	Oscillospirales	CAG-272	unclassified	unclassified	unclassified		11	149	2507	48367	medium
megahit_KCN11_bin.4	MAG-0676	KCN11	megahit	89.3	2.48	2091929	20799	d__Bacteria;p__Bacteroidota;c__Bacteroidia;o__Bacteroidales;f__UBA932;g__UBA1232;	Bacteria	Bacteroidota	Bacteroidia	Bacteroidales	UBA932	UBA1232	unclassified	unclassified	5S ribosomal RNA,5S ribosomal RNA	20	146	2556	121062	medium
megahit_KCN11_bin.40	MAG-0677	KCN11	megahit	89.7	0	1236796	12769	d__Bacteria;p__Elusimicrobiota;c__Elusimicrobia;o__Elusimicrobiales;f__Elusimicrobiaceae;g__UBA1436;	Bacteria	Elusimicrobiota	Elusimicrobia	Elusimicrobiales	Elusimicrobiaceae	UBA1436	unclassified	unclassified		20	136	2520	46436	medium
megahit_KCN11_bin.45	MAG-0678	KCN11	megahit	92.11	2.46	1345262	17373	d__Bacteria;p__Firmicutes_A;c__Clostridia;o__Oscillospirales;f__Ruminococcaceae;	Bacteria	Firmicutes_A	Clostridia	Oscillospirales	Ruminococcaceae	unclassified	unclassified	unclassified	5S ribosomal RNA	17	111	2520	52744	high
megahit_KCN11_bin.46	MAG-0679	KCN11	megahit	93.18	1.43	1914229	23237	d__Bacteria;p__Firmicutes_A;c__Clostridia;o__Oscillospirales;f__CAG	Bacteria	Firmicutes_A	Clostridia	Oscillospirales	CAG-272	CAG-448	unclassified	unclassified	5S ribosomal RNA	20	121	2613	79890	high
megahit_KCN11_bin.49	MAG-0680	KCN11	megahit	89.01	1.18	1994240	13562	d__Bacteria;p__Verrucomicrobiota;c__Verrucomicrobiae;o__Opitutales;f__UBA953;	Bacteria	Verrucomicrobiota	Verrucomicrobiae	Opitutales	UBA953	unclassified	unclassified	unclassified		20	174	2563	50523	medium
megahit_KCN11_bin.53	MAG-0681	KCN11	megahit	84.62	1.6	1495156	32323	d__Bacteria;p__Bacteroidota;c__Bacteroidia;o__Bacteroidales;f__Rikenellaceae;g__Alistipes;	Bacteria	Bacteroidota	Bacteroidia	Bacteroidales	Rikenellaceae	Alistipes	unclassified	unclassified	5S ribosomal RNA	16	75	2691	118910	medium
megahit_KCN11_bin.66	MAG-0682	KCN11	megahit	89.32	1.7	1508262	27928	d__Bacteria;p__Bacteroidota;c__Bacteroidia;o__Bacteroidales;f__Rikenellaceae;g__Tidjanibacter;	Bacteria	Bacteroidota	Bacteroidia	Bacteroidales	Rikenellaceae	Tidjanibacter	unclassified	unclassified		18	82	2776	81347	medium
megahit_KCN11_bin.68	MAG-0683	KCN11	megahit	91.42	1.04	1925394	21827	d__Bacteria;p__Firmicutes_A;c__Clostridia;o__4C28d	Bacteria	Firmicutes_A	Clostridia	4C28d-15	CAG-727	QALS01	unclassified	unclassified		18	122	2662	62028	high
megahit_KCN11_bin.74	MAG-0684	KCN11	megahit	92.88	9.21	2399818	46776	d__Bacteria;p__Bacteroidota;c__Bacteroidia;o__Bacteroidales;f__UBA932;g__RC9;	Bacteria	Bacteroidota	Bacteroidia	Bacteroidales	UBA932	RC9	unclassified	unclassified	5S ribosomal RNA,5S ribosomal RNA	20	90	2556	127680	low
megahit_KCN11_bin.86	MAG-0685	KCN11	megahit	87.6	0.37	2024104	28410	d__Bacteria;p__Verrucomicrobiota;c__Kiritimatiellae;o__RFP12;	Bacteria	Verrucomicrobiota	Kiritimatiellae	RFP12	unclassified	unclassified	unclassified	unclassified	5S ribosomal RNA	20	102	3302	67061	medium
megahit_KCN11_bin.89	MAG-0686	KCN11	megahit	94.34	2.15	1427032	16141	d__Bacteria;p__Firmicutes_A;c__Clostridia;o__Oscillospirales;f__CAG	Bacteria	Firmicutes_A	Clostridia	Oscillospirales	CAG-272	unclassified	unclassified	unclassified	16S ribosomal RNA (partial),5S ribosomal RNA,5S ribosomal RNA	18	130	2504	44555	high
megahit_KCN11_bin.92	MAG-0687	KCN11	megahit	89.85	1.12	2329312	40855	d__Bacteria;p__Bacteroidota;c__Bacteroidia;o__Bacteroidales;f__Bacteroidaceae;	Bacteria	Bacteroidota	Bacteroidia	Bacteroidales	Bacteroidaceae	unclassified	unclassified	unclassified	5S ribosomal RNA,5S ribosomal RNA	17	87	2510	131265	medium
megahit_KCN11_bin.99	MAG-0688	KCN11	megahit	85.98	1.73	1912029	24623	d__Bacteria;p__Firmicutes_A;c__Clostridia;o__Oscillospirales;f__Oscillospiraceae;g__CAG	Bacteria	Firmicutes_A	Clostridia	Oscillospirales	Oscillospiraceae	CAG-110	unclassified	unclassified	5S ribosomal RNA,5S ribosomal RNA	20	125	2542	103203	medium
megahit_KCN12_bin.18	MAG-0689	KCN12	megahit	93.53	2.01	1966692	28878	d__Bacteria;p__Firmicutes_A;c__Clostridia;o__Oscillospirales;f__CAG	Bacteria	Firmicutes_A	Clostridia	Oscillospirales	CAG-272	UBA1740	unclassified	unclassified		19	99	2780	83271	high
megahit_KCN12_bin.28	MAG-0690	KCN12	megahit	86.81	5.09	2365456	45720	d__Bacteria;p__Bacteroidota;c__Bacteroidia;o__Bacteroidales;f__Bacteroidaceae;	Bacteria	Bacteroidota	Bacteroidia	Bacteroidales	Bacteroidaceae	unclassified	unclassified	unclassified		20	87	2894	109017	medium
megahit_KCN12_bin.31	MAG-0691	KCN12	megahit	92.1	3.36	1489384	20388	d__Bacteria;p__Firmicutes_A;c__Clostridia;o__Oscillospirales;f__CAG	Bacteria	Firmicutes_A	Clostridia	Oscillospirales	CAG-272	unclassified	unclassified	unclassified		19	115	2568	74358	high
megahit_KCN12_bin.37	MAG-0692	KCN12	megahit	82.82	3.34	2216809	10704	d__Bacteria;p__Firmicutes_A;c__Clostridia;o__Oscillospirales;f__CAG	Bacteria	Firmicutes_A	Clostridia	Oscillospirales	CAG-272	CAG-448	unclassified	unclassified		17	255	2504	38468	medium
megahit_KCN13_bin.2	MAG-0693	KCN13	megahit	91.61	0.25	2379573	14828	d__Bacteria;p__Spirochaetota;c__Spirochaetia;o__Treponematales;f__Treponemataceae;g__Treponema_D;	Bacteria	Spirochaetota	Spirochaetia	Treponematales	Treponemataceae	Treponema_D	unclassified	unclassified	5S ribosomal RNA	20	224	2503	72504	high
megahit_KCN13_bin.32	MAG-0694	KCN13	megahit	97.58	1.61	1760019	29674	d__Bacteria;p__Bacteroidota;c__Bacteroidia;o__Bacteroidales;f__Paludibacteraceae;g__RUG163;	Bacteria	Bacteroidota	Bacteroidia	Bacteroidales	Paludibacteraceae	RUG163	unclassified	unclassified	5S ribosomal RNA,5S ribosomal RNA,5S ribosomal RNA	20	84	2503	153081	high
megahit_KCN13_bin.37	MAG-0695	KCN13	megahit	84.1	1.54	2036389	9253	d__Bacteria;p__Firmicutes_A;c__Clostridia;o__Oscillospirales;f__CAG	Bacteria	Firmicutes_A	Clostridia	Oscillospirales	CAG-272	QALR01	unclassified	unclassified	5S ribosomal RNA	17	276	2518	28705	medium
megahit_KCN13_bin.38	MAG-0696	KCN13	megahit	92.31	0.35	1607185	13468	d__Bacteria;p__Firmicutes_A;c__Clostridia;o__UBA1212;f__UBA1255;	Bacteria	Firmicutes_A	Clostridia	UBA1212	UBA1255	unclassified	unclassified	unclassified	5S ribosomal RNA	18	148	2546	48897	high
megahit_KCN13_bin.46	MAG-0697	KCN13	megahit	92.49	4.09	1562805	22915	d__Bacteria;p__Bacteroidota;c__Bacteroidia;o__Bacteroidales;f__Rikenellaceae;g__Alistipes;	Bacteria	Bacteroidota	Bacteroidia	Bacteroidales	Rikenellaceae	Alistipes	unclassified	unclassified	5S ribosomal RNA	19	109	2503	50433	high
megahit_KCN13_bin.61	MAG-0698	KCN13	megahit	81.11	2.35	1314086	26872	d__Bacteria;p__Firmicutes_A;c__Clostridia;o__4C28d	Bacteria	Firmicutes_A	Clostridia	4C28d-15	CAG-917	unclassified	unclassified	unclassified	16S ribosomal RNA,23S ribosomal RNA,5S ribosomal RNA	20	71	2904	90868	medium
megahit_KCN14_bin.15	MAG-0699	KCN14	megahit	89.71	0.22	1548839	86019	d__Bacteria;p__Firmicutes_A;c__Clostridia;o__Oscillospirales;f__Acutalibacteraceae;	Bacteria	Firmicutes_A	Clostridia	Oscillospirales	Acutalibacteraceae	unclassified	unclassified	unclassified	5S ribosomal RNA,16S ribosomal RNA (partial)	20	38	2790	159464	medium
megahit_KCN14_bin.34	MAG-0700	KCN14	megahit	96.55	0.96	1861248	28635	d__Bacteria;p__Bacteroidota;c__Bacteroidia;o__Bacteroidales;f__Rikenellaceae;g__Alistipes;	Bacteria	Bacteroidota	Bacteroidia	Bacteroidales	Rikenellaceae	Alistipes	unclassified	unclassified	5S ribosomal RNA	18	96	2517	83243	high
megahit_KCN14_bin.35	MAG-0701	KCN14	megahit	99.3	0	2692766	43412	d__Bacteria;p__Spirochaetota;c__Spirochaetia;o__Treponematales;f__Treponemataceae;g__Treponema_F;	Bacteria	Spirochaetota	Spirochaetia	Treponematales	Treponemataceae	Treponema_F	unclassified	unclassified	5S ribosomal RNA,5S ribosomal RNA,5S ribosomal RNA,5S ribosomal RNA,5S ribosomal RNA,5S ribosomal RNA (partial)	20	97	2514	168976	high
megahit_KCN16_bin.22	MAG-0702	KCN16	megahit	84.41	1.21	1647430	15753	d__Bacteria;p__Firmicutes_A;c__Clostridia;o__4C28d	Bacteria	Firmicutes_A	Clostridia	4C28d-15	CAG-727	QALS01	unclassified	unclassified	5S ribosomal RNA	13	148	2525	70932	medium
megahit_KCN16_bin.25	MAG-0703	KCN16	megahit	92.39	1.49	2261296	35954	d__Bacteria;p__Bacteroidota;c__Bacteroidia;o__Bacteroidales;f__Bacteroidaceae;	Bacteria	Bacteroidota	Bacteroidia	Bacteroidales	Bacteroidaceae	unclassified	unclassified	unclassified	5S ribosomal RNA	19	99	2616	127805	high
megahit_KCN16_bin.9	MAG-0704	KCN16	megahit	90.79	1.92	3337991	11840	d__Bacteria;p__Firmicutes_A;c__Clostridia;o__Lachnospirales;f__Lachnospiraceae;g__Butyrivibrio;	Bacteria	Firmicutes_A	Clostridia	Lachnospirales	Lachnospiraceae	Butyrivibrio	unclassified	unclassified		14	368	2509	52015	high
megahit_KCN17_bin.19	MAG-0705	KCN17	megahit	85.23	1.29	2039959	40008	d__Bacteria;p__Bacteroidota;c__Bacteroidia;o__Bacteroidales;f__Bacteroidaceae;	Bacteria	Bacteroidota	Bacteroidia	Bacteroidales	Bacteroidaceae	unclassified	unclassified	unclassified	16S ribosomal RNA (partial),5S ribosomal RNA	20	76	2759	110540	medium
megahit_KCN17_bin.22	MAG-0706	KCN17	megahit	95.29	4.97	2014612	27351	d__Bacteria;p__Bacteroidota;c__Bacteroidia;o__Bacteroidales;f__Rikenellaceae;g__Alistipes;	Bacteria	Bacteroidota	Bacteroidia	Bacteroidales	Rikenellaceae	Alistipes	unclassified	unclassified	5S ribosomal RNA	20	116	2601	79587	high
megahit_KCN17_bin.24	MAG-0707	KCN17	megahit	90.21	1.68	1712917	12143	d__Bacteria;p__Firmicutes_A;c__Clostridia;o__Oscillospirales;f__Acutalibacteraceae;g__CAG	Bacteria	Firmicutes_A	Clostridia	Oscillospirales	Acutalibacteraceae	CAG-180	unclassified	unclassified	5S ribosomal RNA,5S ribosomal RNA	20	178	2505	47592	high
megahit_KCN18_bin.1	MAG-0708	KCN18	megahit	90.29	2.42	1971130	18345	d__Bacteria;p__Bacteroidota;c__Bacteroidia;o__Bacteroidales;f__Paludibacteraceae;g__RF16;	Bacteria	Bacteroidota	Bacteroidia	Bacteroidales	Paludibacteraceae	RF16	unclassified	unclassified	5S ribosomal RNA	19	153	2511	46360	high
megahit_KCN18_bin.19	MAG-0709	KCN18	megahit	85.03	3.11	2363623	29733	d__Bacteria;p__Bacteroidota;c__Bacteroidia;o__Bacteroidales;f__Bacteroidaceae;g__UBA1189;	Bacteria	Bacteroidota	Bacteroidia	Bacteroidales	Bacteroidaceae	UBA1189	unclassified	unclassified	5S ribosomal RNA	19	114	2501	97541	medium
megahit_KCN19_bin.12	MAG-0710	KCN19	megahit	95.75	1.34	2228971	22901	d__Bacteria;p__Firmicutes_A;c__Clostridia;o__Oscillospirales;f__CAG	Bacteria	Firmicutes_A	Clostridia	Oscillospirales	CAG-272	unclassified	unclassified	unclassified	5S ribosomal RNA (partial)	16	151	2515	80712	high
megahit_KCN19_bin.23	MAG-0711	KCN19	megahit	90.69	0.8	1880545	18622	d__Archaea;p__Euryarchaeota;c__Methanobacteria;o__Methanobacteriales;f__Methanobacteriaceae;g__Methanobrevibacter_A;	Archaea	Euryarchaeota	Methanobacteria	Methanobacteriales	Methanobacteriaceae	Methanobrevibacter_A	unclassified	unclassified		20	137	2569	43254	high
megahit_KCN19_bin.27	MAG-0712	KCN19	megahit	88.87	4.31	2030596	10489	d__Bacteria;p__Firmicutes_A;c__Clostridia;o__Oscillospirales;f__CAG	Bacteria	Firmicutes_A	Clostridia	Oscillospirales	CAG-272	QALR01	unclassified	unclassified		15	263	2518	59827	medium
megahit_KCN19_bin.33	MAG-0713	KCN19	megahit	91.03	4.33	1715634	20789	d__Bacteria;p__Bacteroidota;c__Bacteroidia;o__Bacteroidales;f__Rikenellaceae;g__Alistipes;	Bacteria	Bacteroidota	Bacteroidia	Bacteroidales	Rikenellaceae	Alistipes	unclassified	unclassified	5S ribosomal RNA,5S ribosomal RNA	16	119	2514	82182	high
megahit_KCN19_bin.48	MAG-0714	KCN19	megahit	91.06	3.04	2580435	15158	d__Bacteria;p__Firmicutes_A;c__Clostridia;o__Oscillospirales;f__CAG	Bacteria	Firmicutes_A	Clostridia	Oscillospirales	CAG-272	CAG-448	unclassified	unclassified		19	232	2549	46346	high
megahit_KCN20_bin.25	MAG-0715	KCN20	megahit	85.31	3.71	2550131	10956	d__Bacteria;p__Firmicutes_A;c__Clostridia;o__Oscillospirales;f__CAG	Bacteria	Firmicutes_A	Clostridia	Oscillospirales	CAG-272	CAG-448	unclassified	unclassified		18	307	2505	39418	medium
megahit_KCN20_bin.37	MAG-0716	KCN20	megahit	89.2	8.44	2968489	31357	d__Bacteria;p__Bacteroidota;c__Bacteroidia;o__Bacteroidales;f__UBA932;g__RC9;	Bacteria	Bacteroidota	Bacteroidia	Bacteroidales	UBA932	RC9	unclassified	unclassified	5S ribosomal RNA	20	209	2511	134339	low
megahit_KCN20_bin.4	MAG-0717	KCN20	megahit	81.83	1.95	1671184	14394	d__Bacteria;p__Bacteroidota;c__Bacteroidia;o__Bacteroidales;f__Rikenellaceae;g__Alistipes;	Bacteria	Bacteroidota	Bacteroidia	Bacteroidales	Rikenellaceae	Alistipes	unclassified	unclassified		16	152	2539	64945	medium
megahit_KCN21_bin.14	MAG-0718	KCN21	megahit	96.57	3.7	1468095	59378	d__Bacteria;p__Firmicutes_A;c__Clostridia;o__4C28d	Bacteria	Firmicutes_A	Clostridia	4C28d-15	CAG-727	QALS01	unclassified	unclassified	5S ribosomal RNA,5S ribosomal RNA,5S ribosomal RNA,16S ribosomal RNA (partial)	20	33	7128	127474	high
megahit_KCN21_bin.2	MAG-0719	KCN21	megahit	92.37	2.8	2146492	40516	d__Bacteria;p__Bacteroidota;c__Bacteroidia;o__Bacteroidales;f__Rikenellaceae;g__Alistipes;	Bacteria	Bacteroidota	Bacteroidia	Bacteroidales	Rikenellaceae	Alistipes	unclassified	unclassified		18	82	2577	105386	high
megahit_KCN21_bin.24	MAG-0720	KCN21	megahit	80.99	2.2	1879728	6628	d__Bacteria;p__Verrucomicrobiota;c__Lentisphaeria;o__Victivallales;f__Victivallaceae;g__UBA1784;	Bacteria	Verrucomicrobiota	Lentisphaeria	Victivallales	Victivallaceae	UBA1784	unclassified	unclassified		18	320	2500	23571	medium
megahit_KCN21_bin.31	MAG-0721	KCN21	megahit	91.61	0.97	2169169	25103	d__Bacteria;p__Firmicutes_A;c__Clostridia;o__Oscillospirales;f__CAG	Bacteria	Firmicutes_A	Clostridia	Oscillospirales	CAG-382	unclassified	unclassified	unclassified	5S ribosomal RNA	18	128	2502	61099	high
megahit_KCN21_bin.39	MAG-0722	KCN21	megahit	81.39	1.01	1670707	12729	d__Bacteria;p__Firmicutes_A;c__Clostridia;o__Oscillospirales;f__CAG	Bacteria	Firmicutes_A	Clostridia	Oscillospirales	CAG-272	unclassified	unclassified	unclassified	16S ribosomal RNA (partial)	12	164	2596	47754	medium
megahit_KCN21_bin.40	MAG-0723	KCN21	megahit	87.17	3.16	2090599	41613	d__Bacteria;p__Bacteroidota;c__Bacteroidia;o__Bacteroidales;f__Bacteroidaceae;	Bacteria	Bacteroidota	Bacteroidia	Bacteroidales	Bacteroidaceae	unclassified	unclassified	unclassified	5S ribosomal RNA	17	78	2956	125725	medium
megahit_KCN21_bin.48	MAG-0724	KCN21	megahit	80.33	0.4	1495154	6931	d__Bacteria;p__Bacteroidota;c__Bacteroidia;o__Bacteroidales;f__UBA932;g__UBA1232;	Bacteria	Bacteroidota	Bacteroidia	Bacteroidales	UBA932	UBA1232	unclassified	unclassified	5S ribosomal RNA	17	245	2503	25876	medium
megahit_KCN21_bin.55	MAG-0725	KCN21	megahit	87.04	2.71	1616943	25647	d__Bacteria;p__Firmicutes_A;c__Clostridia;o__Oscillospirales;f__CAG	Bacteria	Firmicutes_A	Clostridia	Oscillospirales	CAG-272	unclassified	unclassified	unclassified	5S ribosomal RNA	19	93	2560	106127	medium
megahit_KCN21_bin.59	MAG-0726	KCN21	megahit	94.47	1.57	1877381	29269	d__Bacteria;p__Firmicutes_A;c__Clostridia;o__Oscillospirales;f__CAG	Bacteria	Firmicutes_A	Clostridia	Oscillospirales	CAG-272	CAG-448	unclassified	unclassified	5S ribosomal RNA (partial),5S ribosomal RNA	20	95	2553	101828	high
megahit_KCN21_bin.60	MAG-0727	KCN21	megahit	89.76	2.15	2601047	46889	d__Bacteria;p__Bacteroidota;c__Bacteroidia;o__Bacteroidales;f__Bacteroidaceae;g__UBA1189;	Bacteria	Bacteroidota	Bacteroidia	Bacteroidales	Bacteroidaceae	UBA1189	unclassified	unclassified	5S ribosomal RNA,5S ribosomal RNA,5S ribosomal RNA (partial)	20	81	2506	158897	medium
megahit_KCN21_bin.61	MAG-0728	KCN21	megahit	91.17	8.07	2323253	18697	d__Bacteria;p__Firmicutes_A;c__Clostridia;o__Oscillospirales;f__CAG	Bacteria	Firmicutes_A	Clostridia	Oscillospirales	CAG-272	UBA1740	unclassified	unclassified		16	173	2544	81350	medium
megahit_KCN21_bin.62	MAG-0729	KCN21	megahit	81.88	2.4	1801042	9827	d__Archaea;p__Euryarchaeota;c__Methanobacteria;o__Methanobacteriales;f__Methanobacteriaceae;g__Methanobrevibacter_A;	Archaea	Euryarchaeota	Methanobacteria	Methanobacteriales	Methanobacteriaceae	Methanobrevibacter_A	unclassified	unclassified		18	233	2512	51570	medium
megahit_KCN21_bin.71	MAG-0730	KCN21	megahit	96.74	0.83	1660939	43022	d__Bacteria;p__Firmicutes_A;c__Clostridia;o__Oscillospirales;f__CAG	Bacteria	Firmicutes_A	Clostridia	Oscillospirales	CAG-272	unclassified	unclassified	unclassified		20	56	2560	213722	high
megahit_KCN22_bin.21	MAG-0731	KCN22	megahit	82.97	3.13	1900628	6749	d__Bacteria;p__Firmicutes_A;c__Clostridia;o__Oscillospirales;f__CAG	Bacteria	Firmicutes_A	Clostridia	Oscillospirales	CAG-272	UBA1740	unclassified	unclassified		14	308	2503	29597	medium
megahit_KCN22_bin.8	MAG-0732	KCN22	megahit	87.01	0.96	1537416	11900	d__Bacteria;p__Bacteroidota;c__Bacteroidia;o__Bacteroidales;f__Rikenellaceae;g__Tidjanibacter;	Bacteria	Bacteroidota	Bacteroidia	Bacteroidales	Rikenellaceae	Tidjanibacter	unclassified	unclassified		18	169	2535	51111	medium
megahit_KCN23_bin.14	MAG-0733	KCN23	megahit	98.83	1.75	2602943	27312	d__Bacteria;p__Spirochaetota;c__Spirochaetia;o__Treponematales;f__Treponemataceae;g__Treponema_F;	Bacteria	Spirochaetota	Spirochaetia	Treponematales	Treponemataceae	Treponema_F	unclassified	unclassified	5S ribosomal RNA (partial),5S ribosomal RNA,5S ribosomal RNA,5S ribosomal RNA,5S ribosomal RNA	20	143	2520	83711	high
megahit_KCN25_bin.17	MAG-0734	KCN25	megahit	95.21	0	1573808	44177	d__Bacteria;p__Proteobacteria;c__Gammaproteobacteria;o__Burkholderiales;f__Burkholderiaceae;g__CAG	Bacteria	Proteobacteria	Gammaproteobacteria	Burkholderiales	Burkholderiaceae	CAG-521	unclassified	unclassified	5S ribosomal RNA,5S ribosomal RNA,23S ribosomal RNA,5S ribosomal RNA,5S ribosomal RNA,5S ribosomal RNA,16S ribosomal RNA,5S ribosomal RNA,5S ribosomal RNA	20	75	2666	145122	high
megahit_KCN25_bin.22	MAG-0735	KCN25	megahit	86.86	3.79	2527475	12331	d__Bacteria;p__Firmicutes_A;c__Clostridia;o__Lachnospirales;f__Lachnospiraceae;g__SZUA	Bacteria	Firmicutes_A	Clostridia	Lachnospirales	Lachnospiraceae	SZUA-378	unclassified	unclassified		16	274	2502	68058	medium
megahit_KCN25_bin.26	MAG-0736	KCN25	megahit	80.76	2.48	1979910	14326	d__Bacteria;p__Bacteroidota;c__Bacteroidia;o__Bacteroidales;f__Bacteroidaceae;	Bacteria	Bacteroidota	Bacteroidia	Bacteroidales	Bacteroidaceae	unclassified	unclassified	unclassified		19	204	2501	43119	medium
megahit_KCN25_bin.38	MAG-0737	KCN25	megahit	80.4	1.17	948218	7738	d__Bacteria;p__Proteobacteria;c__Alphaproteobacteria;o__RF32;f__CAG	Bacteria	Proteobacteria	Alphaproteobacteria	RF32	CAG-239	CAG-495	unclassified	unclassified		12	142	2538	33922	medium
megahit_KCN25_bin.4	MAG-0738	KCN25	megahit	80.32	4.84	1103783	8702	d__Bacteria;p__Firmicutes_A;c__Clostridia;o__4C28d	Bacteria	Firmicutes_A	Clostridia	4C28d-15	CAG-727	QALS01	unclassified	unclassified	5S ribosomal RNA,5S ribosomal RNA	9	154	2528	36481	medium
megahit_KCN26_bin.14	MAG-0739	KCN26	megahit	82.64	2.3	2826619	7618	d__Bacteria;p__Firmicutes_A;c__Clostridia;o__Lachnospirales;f__Lachnospiraceae;g__Acetivibrio_A;	Bacteria	Firmicutes_A	Clostridia	Lachnospirales	Lachnospiraceae	Acetivibrio_A	unclassified	unclassified		20	417	2500	89117	medium
megahit_KCN26_bin.18	MAG-0740	KCN26	megahit	87.94	1.28	1513248	31173	d__Bacteria;p__Bacteroidota;c__Bacteroidia;o__Bacteroidales;f__Rikenellaceae;g__Alistipes;	Bacteria	Bacteroidota	Bacteroidia	Bacteroidales	Rikenellaceae	Alistipes	unclassified	unclassified		15	65	2971	97433	medium
megahit_KCN27_bin.9	MAG-0741	KCN27	megahit	90.7	2.89	2615285	35963	d__Bacteria;p__Bacteroidota;c__Bacteroidia;o__Bacteroidales;f__Bacteroidaceae;	Bacteria	Bacteroidota	Bacteroidia	Bacteroidales	Bacteroidaceae	unclassified	unclassified	unclassified	5S ribosomal RNA	20	112	2584	96543	high
megahit_KCN29_bin.102	MAG-0742	KCN29	megahit	86.6	0.22	1200620	9171	d__Archaea;p__Halobacterota;c__Methanomicrobia;o__Methanomicrobiales;f__Methanocorpusculaceae;g__Methanocorpusculum;	Archaea	Halobacterota	Methanomicrobia	Methanomicrobiales	Methanocorpusculaceae	Methanocorpusculum	unclassified	unclassified	5S ribosomal RNA	20	166	2521	30987	medium
megahit_KCN29_bin.22	MAG-0743	KCN29	megahit	81.6	3.63	1195708	13773	d__Bacteria;p__Firmicutes_A;c__Clostridia;o__4C28d	Bacteria	Firmicutes_A	Clostridia	4C28d-15	CAG-727	unclassified	unclassified	unclassified	5S ribosomal RNA	14	129	2518	56075	medium
megahit_KCN29_bin.28	MAG-0744	KCN29	megahit	90.85	0.34	1943125	28343	d__Bacteria;p__Firmicutes_A;c__Clostridia;o__Oscillospirales;f__CAG	Bacteria	Firmicutes_A	Clostridia	Oscillospirales	CAG-272	Firm-07	unclassified	unclassified		17	94	2819	105297	high
megahit_KCN29_bin.33	MAG-0745	KCN29	megahit	92.7	2.03	2155858	32267	d__Bacteria;p__Bacteroidota;c__Bacteroidia;o__Bacteroidales;f__Bacteroidaceae;	Bacteria	Bacteroidota	Bacteroidia	Bacteroidales	Bacteroidaceae	unclassified	unclassified	unclassified	5S ribosomal RNA	18	95	2612	113599	high
megahit_KCN29_bin.44	MAG-0746	KCN29	megahit	95.19	1.69	2343285	20345	d__Bacteria;p__Spirochaetota;c__Spirochaetia;o__Treponematales;f__Treponemataceae;g__Treponema_F;	Bacteria	Spirochaetota	Spirochaetia	Treponematales	Treponemataceae	Treponema_F	unclassified	unclassified	5S ribosomal RNA,5S ribosomal RNA,5S ribosomal RNA,16S ribosomal RNA,23S ribosomal RNA (partial),5S ribosomal RNA	20	174	2725	58485	high
megahit_KCN29_bin.48	MAG-0747	KCN29	megahit	80.06	1.68	1683674	22288	d__Bacteria;p__Firmicutes_A;c__Clostridia;o__Oscillospirales;f__CAG	Bacteria	Firmicutes_A	Clostridia	Oscillospirales	CAG-272	UBA1740	unclassified	unclassified		15	108	2511	56833	medium
megahit_KCN29_bin.49	MAG-0748	KCN29	megahit	85.56	2.35	1430207	13264	d__Bacteria;p__Firmicutes_A;c__Clostridia;o__Oscillospirales;f__CAG	Bacteria	Firmicutes_A	Clostridia	Oscillospirales	CAG-272	CAG-448	unclassified	unclassified		14	156	2502	47616	medium
megahit_KCN29_bin.5	MAG-0749	KCN29	megahit	80.31	3.75	2943149	8359	d__Bacteria;p__Verrucomicrobiota;c__Kiritimatiellae;o__RFP12;f__UBA1067;g__UBA1731;	Bacteria	Verrucomicrobiota	Kiritimatiellae	RFP12	UBA1067	UBA1731	unclassified	unclassified	5S ribosomal RNA	20	419	2513	50473	medium
megahit_KCN29_bin.50	MAG-0750	KCN29	megahit	93.6	3.54	2200849	14693	d__Bacteria;p__Bacteroidota;c__Bacteroidia;o__Bacteroidales;f__Rikenellaceae;g__Alistipes;	Bacteria	Bacteroidota	Bacteroidia	Bacteroidales	Rikenellaceae	Alistipes	unclassified	unclassified		18	204	2517	56848	high
megahit_KCN29_bin.74	MAG-0751	KCN29	megahit	83.48	2.03	2212970	7232	d__Bacteria;p__Firmicutes_A;c__Clostridia;o__Oscillospirales;f__CAG	Bacteria	Firmicutes_A	Clostridia	Oscillospirales	CAG-272	unclassified	unclassified	unclassified	5S ribosomal RNA (partial),5S ribosomal RNA (partial)	16	359	2503	24523	medium
megahit_KCN29_bin.76	MAG-0752	KCN29	megahit	95.87	0	2549184	42150	d__Bacteria;p__Firmicutes_A;c__Clostridia;o__Oscillospirales;f__CAG	Bacteria	Firmicutes_A	Clostridia	Oscillospirales	CAG-272	CAG-448	unclassified	unclassified		20	102	2514	122418	high
megahit_KCN29_bin.96	MAG-0753	KCN29	megahit	92.26	1.64	2258235	48748	d__Bacteria;p__Bacteroidota;c__Bacteroidia;o__Bacteroidales;f__UBA932;g__RC9;	Bacteria	Bacteroidota	Bacteroidia	Bacteroidales	UBA932	RC9	unclassified	unclassified	5S ribosomal RNA (partial),5S ribosomal RNA (partial)	20	66	2717	166320	high
megahit_KCN30_bin.12	MAG-0754	KCN30	megahit	91.79	4.7	1383214	19085	d__Bacteria;p__Firmicutes_A;c__Clostridia;o__4C28d	Bacteria	Firmicutes_A	Clostridia	4C28d-15	CAG-727	QALS01	unclassified	unclassified	5S ribosomal RNA	19	111	2500	48542	high
megahit_KCN30_bin.14	MAG-0755	KCN30	megahit	94.92	3.12	1791444	22472	d__Bacteria;p__Bacteroidota;c__Bacteroidia;o__Bacteroidales;f__Rikenellaceae;g__Alistipes;	Bacteria	Bacteroidota	Bacteroidia	Bacteroidales	Rikenellaceae	Alistipes	unclassified	unclassified		17	113	2538	74039	high
megahit_KCN30_bin.15	MAG-0756	KCN30	megahit	97.33	3.33	2296676	9612	d__Bacteria;p__Firmicutes;c__Bacilli;o__ML615J	Bacteria	Firmicutes	Bacilli	ML615J-28	CAG-313	unclassified	unclassified	unclassified		20	310	2514	41031	high
megahit_KCN30_bin.17	MAG-0757	KCN30	megahit	82.74	1.1	1999636	15163	d__Bacteria;p__Bacteroidota;c__Bacteroidia;o__Bacteroidales;f__Bacteroidaceae;	Bacteria	Bacteroidota	Bacteroidia	Bacteroidales	Bacteroidaceae	unclassified	unclassified	unclassified	5S ribosomal RNA	18	176	2561	49296	medium
megahit_KCN30_bin.2	MAG-0758	KCN30	megahit	82.25	3.51	2917859	19691	d__Bacteria;p__Firmicutes_A;c__Clostridia;o__Oscillospirales;f__CAG	Bacteria	Firmicutes_A	Clostridia	Oscillospirales	CAG-272	CAG-448	unclassified	unclassified		16	216	2514	86481	medium
megahit_KCN30_bin.22	MAG-0759	KCN30	megahit	96.14	1.01	2318579	22318	d__Bacteria;p__Firmicutes_A;c__Clostridia;o__Oscillospirales;f__Oscillospiraceae;g__CAG	Bacteria	Firmicutes_A	Clostridia	Oscillospirales	Oscillospiraceae	CAG-110	unclassified	unclassified	5S ribosomal RNA,5S ribosomal RNA	20	179	2520	90499	high
megahit_KCN30_bin.35	MAG-0760	KCN30	megahit	88.99	0.76	1955683	14248	d__Bacteria;p__Firmicutes_A;c__Clostridia;o__Oscillospirales;f__CAG	Bacteria	Firmicutes_A	Clostridia	Oscillospirales	CAG-272	Firm-07	unclassified	unclassified		15	186	2502	45820	medium
megahit_KCN30_bin.36	MAG-0761	KCN30	megahit	87.26	1.03	1949793	35451	d__Bacteria;p__Firmicutes_A;c__Clostridia;o__Oscillospirales;f__CAG	Bacteria	Firmicutes_A	Clostridia	Oscillospirales	CAG-272	UBA1740	unclassified	unclassified		18	87	2995	151663	medium
megahit_KCN30_bin.56	MAG-0762	KCN30	megahit	82.68	2.87	1760664	60796	d__Bacteria;p__Firmicutes_A;c__Clostridia;o__Oscillospirales;f__CAG	Bacteria	Firmicutes_A	Clostridia	Oscillospirales	CAG-272	UBA1740	unclassified	unclassified		19	52	2552	119807	medium
megahit_KCN30_bin.57	MAG-0763	KCN30	megahit	83.74	5.28	2308537	11211	d__Bacteria;p__Firmicutes_A;c__Clostridia;o__Lachnospirales;f__Lachnospiraceae;g__Agathobacter;	Bacteria	Firmicutes_A	Clostridia	Lachnospirales	Lachnospiraceae	Agathobacter	unclassified	unclassified		13	275	2513	56359	medium
megahit_KCN30_bin.60	MAG-0764	KCN30	megahit	81.72	3.14	1209051	8765	d__Bacteria;p__Firmicutes_A;c__Clostridia;o__4C28d	Bacteria	Firmicutes_A	Clostridia	4C28d-15	CAG-727	QALS01	unclassified	unclassified		14	172	2548	29919	medium
megahit_KCN31_bin.27	MAG-0765	KCN31	megahit	95.49	1.57	2464422	44325	d__Bacteria;p__Firmicutes_A;c__Clostridia;o__Oscillospirales;f__CAG	Bacteria	Firmicutes_A	Clostridia	Oscillospirales	CAG-272	CAG-448	unclassified	unclassified		20	89	3279	142695	high
megahit_KCN31_bin.33	MAG-0766	KCN31	megahit	92.4	2.8	2235774	34396	d__Bacteria;p__Firmicutes_A;c__Clostridia;o__Oscillospirales;f__CAG	Bacteria	Firmicutes_A	Clostridia	Oscillospirales	CAG-272	CAG-448	unclassified	unclassified		19	100	2513	121855	high
megahit_KCN31_bin.34	MAG-0767	KCN31	megahit	92.39	1.14	1829101	27159	d__Bacteria;p__Firmicutes_A;c__Clostridia;o__Oscillospirales;f__CAG	Bacteria	Firmicutes_A	Clostridia	Oscillospirales	CAG-272	CAG-448	unclassified	unclassified		17	112	2509	88545	high
megahit_KCN31_bin.40	MAG-0768	KCN31	megahit	94.85	1.76	2038367	26954	d__Bacteria;p__Firmicutes_A;c__Clostridia;o__Oscillospirales;f__CAG	Bacteria	Firmicutes_A	Clostridia	Oscillospirales	CAG-272	unclassified	unclassified	unclassified		18	121	2731	110950	high
megahit_KCN31_bin.46	MAG-0769	KCN31	megahit	84.76	1.7	1555952	46277	d__Bacteria;p__Firmicutes_A;c__Clostridia;o__Oscillospirales;f__CAG	Bacteria	Firmicutes_A	Clostridia	Oscillospirales	CAG-272	UBA1740	unclassified	unclassified		17	57	2604	120537	medium
megahit_KCN31_bin.59	MAG-0770	KCN31	megahit	93.27	1.64	2539785	34294	d__Bacteria;p__Bacteroidota;c__Bacteroidia;o__Bacteroidales;f__UBA932;g__RC9;	Bacteria	Bacteroidota	Bacteroidia	Bacteroidales	UBA932	RC9	unclassified	unclassified	5S ribosomal RNA,5S ribosomal RNA	19	138	2518	88341	high
megahit_KCN32_bin.11	MAG-0771	KCN32	megahit	88.76	5.23	2060600	10051	d__Bacteria;p__Firmicutes_A;c__Clostridia;o__Oscillospirales;f__CAG	Bacteria	Firmicutes_A	Clostridia	Oscillospirales	CAG-272	UBA1740	unclassified	unclassified		16	260	2526	50576	medium
megahit_KCN33_bin.18	MAG-0772	KCN33	megahit	89.86	0.71	2052529	25151	d__Bacteria;p__Verrucomicrobiota;c__Kiritimatiellae;o__RFP12;	Bacteria	Verrucomicrobiota	Kiritimatiellae	RFP12	unclassified	unclassified	unclassified	unclassified	5S ribosomal RNA	20	103	3018	80915	medium
megahit_KCN35_bin.11	MAG-0773	KCN35	megahit	80.67	6.03	1987877	21015	d__Bacteria;p__Bacteroidota;c__Bacteroidia;o__Bacteroidales;f__Paludibacteraceae;g__RF16;	Bacteria	Bacteroidota	Bacteroidia	Bacteroidales	Paludibacteraceae	RF16	unclassified	unclassified	5S ribosomal RNA	17	161	2507	52991	medium
megahit_KCN35_bin.5	MAG-0774	KCN35	megahit	95.36	1.28	1391484	25420	d__Bacteria;p__Firmicutes_A;c__Clostridia;o__4C28d	Bacteria	Firmicutes_A	Clostridia	4C28d-15	CAG-727	QALS01	unclassified	unclassified	5S ribosomal RNA,5S ribosomal RNA,23S ribosomal RNA	19	89	2548	74498	high
megahit_KCN4_bin.7	MAG-0775	KCN4	megahit	88.74	2.42	1572477	15716	d__Bacteria;p__Bacteroidota;c__Bacteroidia;o__Bacteroidales;f__Rikenellaceae;g__Alistipes;	Bacteria	Bacteroidota	Bacteroidia	Bacteroidales	Rikenellaceae	Alistipes	unclassified	unclassified	5S ribosomal RNA,5S ribosomal RNA	17	142	2528	46413	medium
megahit_KCN5_bin.18	MAG-0776	KCN5	megahit	96.5	0.05	2323798	29728	d__Bacteria;p__Spirochaetota;c__Spirochaetia;o__Treponematales;f__Treponemataceae;g__Treponema_F;	Bacteria	Spirochaetota	Spirochaetia	Treponematales	Treponemataceae	Treponema_F	unclassified	unclassified	5S ribosomal RNA,16S ribosomal RNA,5S ribosomal RNA,5S ribosomal RNA,5S ribosomal RNA (partial)	20	107	3087	104154	high
megahit_KCN6_bin.100	MAG-0777	KCN6	megahit	96.63	2.88	1796402	198185	d__Bacteria;p__Bacteroidota;c__Bacteroidia;o__Bacteroidales;f__Rikenellaceae;g__Alistipes;	Bacteria	Bacteroidota	Bacteroidia	Bacteroidales	Rikenellaceae	Alistipes	unclassified	unclassified	5S ribosomal RNA,16S ribosomal RNA (partial)	20	15	13944	355350	high
megahit_KCN6_bin.101	MAG-0778	KCN6	megahit	90	3.51	1903082	12543	d__Bacteria;p__Firmicutes_A;c__Clostridia;o__4C28d	Bacteria	Firmicutes_A	Clostridia	4C28d-15	CAG-727	QALS01	unclassified	unclassified	5S ribosomal RNA	14	195	2539	45583	high
megahit_KCN6_bin.109	MAG-0779	KCN6	megahit	94.47	0	1697063	39987	d__Bacteria;p__Bacteroidota;c__Bacteroidia;o__Bacteroidales;f__Rikenellaceae;g__Tidjanibacter;	Bacteria	Bacteroidota	Bacteroidia	Bacteroidales	Rikenellaceae	Tidjanibacter	unclassified	unclassified	16S ribosomal RNA (partial),5S ribosomal RNA	20	60	3507	111886	high
megahit_KCN6_bin.11	MAG-0780	KCN6	megahit	83.89	0	1805685	48032	d__Bacteria;p__Firmicutes_A;c__Clostridia;o__Oscillospirales;f__CAG	Bacteria	Firmicutes_A	Clostridia	Oscillospirales	CAG-272	unclassified	unclassified	unclassified	16S ribosomal RNA (partial),5S ribosomal RNA,5S ribosomal RNA	18	58	2512	130463	medium
megahit_KCN6_bin.113	MAG-0781	KCN6	megahit	95.16	0.81	1357389	98596	d__Bacteria;p__Firmicutes_A;c__Clostridia;o__4C28d	Bacteria	Firmicutes_A	Clostridia	4C28d-15	CAG-314	unclassified	unclassified	unclassified	5S ribosomal RNA,16S ribosomal RNA,5S ribosomal RNA	20	22	4854	180695	high
megahit_KCN6_bin.129	MAG-0782	KCN6	megahit	95.56	2.22	1636479	27626	d__Bacteria;p__Firmicutes_A;c__Clostridia;o__Oscillospirales;f__CAG	Bacteria	Firmicutes_A	Clostridia	Oscillospirales	CAG-272	unclassified	unclassified	unclassified	5S ribosomal RNA,5S ribosomal RNA	20	87	2710	100730	high
megahit_KCN6_bin.14	MAG-0783	KCN6	megahit	91.7	2.57	2311682	19308	d__Bacteria;p__Firmicutes_A;c__Clostridia;o__Oscillospirales;f__Acutalibacteraceae;g__UBA6857;	Bacteria	Firmicutes_A	Clostridia	Oscillospirales	Acutalibacteraceae	UBA6857	unclassified	unclassified	5S ribosomal RNA	18	164	2719	66339	high
megahit_KCN6_bin.22	MAG-0784	KCN6	megahit	88.99	1.51	1949921	44458	d__Bacteria;p__Firmicutes_A;c__Clostridia;o__Oscillospirales;f__CAG	Bacteria	Firmicutes_A	Clostridia	Oscillospirales	CAG-272	UBA1740	unclassified	unclassified		20	68	3025	90181	medium
megahit_KCN6_bin.38	MAG-0785	KCN6	megahit	90.16	4.34	2539745	15280	d__Bacteria;p__Spirochaetota;c__Spirochaetia;o__Treponematales;f__Treponemataceae;g__Treponema_F;	Bacteria	Spirochaetota	Spirochaetia	Treponematales	Treponemataceae	Treponema_F	unclassified	unclassified	5S ribosomal RNA,5S ribosomal RNA,5S ribosomal RNA,5S ribosomal RNA	20	227	2525	60657	high
megahit_KCN6_bin.52	MAG-0786	KCN6	megahit	87.91	0	870546	68415	d__Bacteria;p__Proteobacteria;c__Alphaproteobacteria;o__Rs	Bacteria	Proteobacteria	Alphaproteobacteria	Rs-D84	Rs-D84	Rs-D84	unclassified	unclassified	23S ribosomal RNA,16S ribosomal RNA	20	24	2851	126098	medium
megahit_KCN6_bin.55	MAG-0787	KCN6	megahit	87.79	2.18	1495496	12038	d__Bacteria;p__Firmicutes_A;c__Clostridia;o__Oscillospirales;f__CAG	Bacteria	Firmicutes_A	Clostridia	Oscillospirales	CAG-272	Firm-07	unclassified	unclassified	5S ribosomal RNA,5S ribosomal RNA	19	158	2573	36586	medium
megahit_KCN6_bin.58	MAG-0788	KCN6	megahit	89.39	3.54	2122310	40101	d__Bacteria;p__Firmicutes_A;c__Clostridia;o__Oscillospirales;f__Oscillospiraceae;g__CAG	Bacteria	Firmicutes_A	Clostridia	Oscillospirales	Oscillospiraceae	CAG-110	unclassified	unclassified	5S ribosomal RNA,5S ribosomal RNA,5S ribosomal RNA	19	88	2900	91878	medium
megahit_KCN6_bin.6	MAG-0789	KCN6	megahit	93.88	2.06	1765461	15603	d__Bacteria;p__Firmicutes_A;c__Clostridia;o__Lachnospirales;f__Lachnospiraceae;	Bacteria	Firmicutes_A	Clostridia	Lachnospirales	Lachnospiraceae	unclassified	unclassified	unclassified		20	179	2520	50246	high
megahit_KCN6_bin.63	MAG-0790	KCN6	megahit	85.27	2.82	1937828	11243	d__Bacteria;p__Firmicutes_A;c__Clostridia;o__Oscillospirales;f__CAG	Bacteria	Firmicutes_A	Clostridia	Oscillospirales	CAG-272	unclassified	unclassified	unclassified		16	222	2544	36455	medium
megahit_KCN6_bin.77	MAG-0791	KCN6	megahit	85.14	2.15	1449810	36854	d__Bacteria;p__Firmicutes_A;c__Clostridia;o__Oscillospirales;f__CAG	Bacteria	Firmicutes_A	Clostridia	Oscillospirales	CAG-272	unclassified	unclassified	unclassified		13	62	3688	80189	medium
megahit_KCN6_bin.8	MAG-0792	KCN6	megahit	92.92	0.46	2183892	58587	d__Bacteria;p__Bacteroidota;c__Bacteroidia;o__Bacteroidales;f__Bacteroidaceae;	Bacteria	Bacteroidota	Bacteroidia	Bacteroidales	Bacteroidaceae	unclassified	unclassified	unclassified		20	49	5390	150903	high
megahit_KCN6_bin.82	MAG-0793	KCN6	megahit	95.09	6.61	2704091	25158	d__Bacteria;p__Firmicutes_A;c__Clostridia;o__Oscillospirales;f__CAG	Bacteria	Firmicutes_A	Clostridia	Oscillospirales	CAG-272	CAG-448	unclassified	unclassified		18	176	2529	82826	medium
megahit_KCN6_bin.93	MAG-0794	KCN6	megahit	80.55	1.12	2373258	12729	d__Bacteria;p__Firmicutes_A;c__Clostridia;o__Lachnospirales;f__Lachnospiraceae;g__Acetivibrio_A;	Bacteria	Firmicutes_A	Clostridia	Lachnospirales	Lachnospiraceae	Acetivibrio_A	unclassified	unclassified		15	255	2502	74739	medium
megahit_KCN6_bin.94	MAG-0795	KCN6	megahit	81.73	0	2558585	16547	d__Bacteria;p__Spirochaetota;c__GWE2	Bacteria	Spirochaetota	GWE2-31-10	GWE2-31-10	GWE2-31-10	unclassified	unclassified	unclassified	5S ribosomal RNA,5S ribosomal RNA,5S ribosomal RNA	18	208	2510	69575	medium
megahit_KCN6_bin.96	MAG-0796	KCN6	megahit	96.25	2.68	2268892	26426	d__Bacteria;p__Firmicutes_A;c__Clostridia;o__Oscillospirales;f__CAG	Bacteria	Firmicutes_A	Clostridia	Oscillospirales	CAG-272	QALR01	unclassified	unclassified		20	128	2709	110300	high
megahit_KCN7_bin.12	MAG-0797	KCN7	megahit	92.86	3.61	1829537	25299	d__Bacteria;p__Bacteroidota;c__Bacteroidia;o__Bacteroidales;f__Rikenellaceae;g__Alistipes;	Bacteria	Bacteroidota	Bacteroidia	Bacteroidales	Rikenellaceae	Alistipes	unclassified	unclassified	16S ribosomal RNA (partial),16S ribosomal RNA (partial)	20	118	2618	73829	high
megahit_KCN8_bin.1	MAG-0798	KCN8	megahit	81.29	7.82	1558526	16831	d__Bacteria;p__Firmicutes_A;c__Clostridia;o__Oscillospirales;f__CAG	Bacteria	Firmicutes_A	Clostridia	Oscillospirales	CAG-272	UBA1740	unclassified	unclassified	5S ribosomal RNA,5S ribosomal RNA	16	130	2542	45801	low
megahit_KCN8_bin.10	MAG-0799	KCN8	megahit	94.99	2.01	1485632	28914	d__Bacteria;p__Firmicutes_A;c__Clostridia;o__Oscillospirales;f__CAG	Bacteria	Firmicutes_A	Clostridia	Oscillospirales	CAG-272	UBA1740	unclassified	unclassified		17	74	3011	91845	high
megahit_KCN8_bin.13	MAG-0800	KCN8	megahit	91.67	0	1355243	17746	d__Bacteria;p__Firmicutes_A;c__Clostridia;o__4C28d	Bacteria	Firmicutes_A	Clostridia	4C28d-15	CAG-727	unclassified	unclassified	unclassified	5S ribosomal RNA	20	115	2515	64946	high
megahit_KCN8_bin.16	MAG-0801	KCN8	megahit	89.25	4.7	2105008	11455	d__Bacteria;p__Bacteroidota;c__Bacteroidia;o__Bacteroidales;f__Paludibacteraceae;g__RUG163;	Bacteria	Bacteroidota	Bacteroidia	Bacteroidales	Paludibacteraceae	RUG163	unclassified	unclassified	5S ribosomal RNA	20	244	2536	37131	medium
megahit_KCN8_bin.17	MAG-0802	KCN8	megahit	81.86	4.81	1369290	120990	d__Bacteria;p__Firmicutes_A;c__Clostridia;o__4C28d	Bacteria	Firmicutes_A	Clostridia	4C28d-15	CAG-917	unclassified	unclassified	unclassified	5S ribosomal RNA,23S ribosomal RNA,16S ribosomal RNA	20	20	9651	287288	medium
megahit_KCN8_bin.23	MAG-0803	KCN8	megahit	82.55	0.86	2242666	50184	d__Bacteria;p__Bacteroidota;c__Bacteroidia;o__Bacteroidales;f__Bacteroidaceae;	Bacteria	Bacteroidota	Bacteroidia	Bacteroidales	Bacteroidaceae	unclassified	unclassified	unclassified	5S ribosomal RNA	19	78	2718	90210	medium
megahit_KCN8_bin.30	MAG-0804	KCN8	megahit	80.23	7.38	2438678	8792	d__Bacteria;p__Firmicutes_A;c__Clostridia;o__Oscillospirales;f__CAG	Bacteria	Firmicutes_A	Clostridia	Oscillospirales	CAG-272	QALR01	unclassified	unclassified		19	342	2506	37232	low
megahit_KCN8_bin.45	MAG-0805	KCN8	megahit	91.13	3.41	2101584	30686	d__Bacteria;p__Bacteroidota;c__Bacteroidia;o__Bacteroidales;f__UBA932;g__RC9;	Bacteria	Bacteroidota	Bacteroidia	Bacteroidales	UBA932	RC9	unclassified	unclassified	5S ribosomal RNA (partial),5S ribosomal RNA	20	93	2544	148896	high
megahit_KCN8_bin.56	MAG-0806	KCN8	megahit	89.86	1.01	1856807	14090	d__Bacteria;p__Firmicutes_A;c__Clostridia;o__Oscillospirales;f__CAG	Bacteria	Firmicutes_A	Clostridia	Oscillospirales	CAG-272	Firm-07	unclassified	unclassified		17	170	2528	44965	medium
megahit_KCN9_bin.15	MAG-0807	KCN9	megahit	81.08	2.01	1296689	29651	d__Bacteria;p__Firmicutes_A;c__Clostridia;o__4C28d	Bacteria	Firmicutes_A	Clostridia	4C28d-15	CAG-917	unclassified	unclassified	unclassified	16S ribosomal RNA,23S ribosomal RNA,5S ribosomal RNA	20	66	3096	63875	medium
megahit_LCN10_bin.10	MAG-0808	LCN10	megahit	90.28	1.01	1376863	13758	d__Bacteria;p__Firmicutes_A;c__Clostridia;o__Oscillospirales;f__CAG	Bacteria	Firmicutes_A	Clostridia	Oscillospirales	CAG-272	Firm-07	unclassified	unclassified		16	127	2545	41669	high
megahit_LCN10_bin.26	MAG-0809	LCN10	megahit	99.3	0.35	2683922	55493	d__Bacteria;p__Spirochaetota;c__Spirochaetia;o__Treponematales;f__Treponemataceae;g__CETP13;	Bacteria	Spirochaetota	Spirochaetia	Treponematales	Treponemataceae	CETP13	unclassified	unclassified	5S ribosomal RNA	20	83	2694	200474	high
megahit_LCN10_bin.27	MAG-0810	LCN10	megahit	82.53	2.99	1993431	10494	d__Bacteria;p__Bacteroidota;c__Bacteroidia;o__Bacteroidales;f__Bacteroidaceae;g__UBA4372;	Bacteria	Bacteroidota	Bacteroidia	Bacteroidales	Bacteroidaceae	UBA4372	unclassified	unclassified	5S ribosomal RNA (partial),5S ribosomal RNA (partial)	18	241	2506	43931	medium
megahit_LCN10_bin.40	MAG-0811	LCN10	megahit	94.93	1.68	1731160	50423	d__Bacteria;p__Bacteroidota;c__Bacteroidia;o__Bacteroidales;f__Rikenellaceae;g__Alistipes;	Bacteria	Bacteroidota	Bacteroidia	Bacteroidales	Rikenellaceae	Alistipes	unclassified	unclassified	5S ribosomal RNA	16	54	2586	94448	high
megahit_LCN10_bin.48	MAG-0812	LCN10	megahit	88.14	0	1320861	8411	d__Bacteria;p__Firmicutes_A;c__Clostridia;o__Oscillospirales;f__Acutalibacteraceae;	Bacteria	Firmicutes_A	Clostridia	Oscillospirales	Acutalibacteraceae	unclassified	unclassified	unclassified	16S ribosomal RNA (partial)	18	190	2531	30080	medium
megahit_LCN10_bin.49	MAG-0813	LCN10	megahit	87.85	0.93	2028574	23404	d__Bacteria;p__Bacteroidota;c__Bacteroidia;o__Bacteroidales;f__Bacteroidaceae;	Bacteria	Bacteroidota	Bacteroidia	Bacteroidales	Bacteroidaceae	unclassified	unclassified	unclassified	5S ribosomal RNA	20	123	2502	106295	medium
megahit_LCN10_bin.75	MAG-0814	LCN10	megahit	88.02	2.82	1607143	14987	d__Bacteria;p__Firmicutes_A;c__Clostridia;o__4C28d	Bacteria	Firmicutes_A	Clostridia	4C28d-15	CAG-727	QALS01	unclassified	unclassified	5S ribosomal RNA	17	157	2571	78517	medium
megahit_LCN11_bin.14	MAG-0815	LCN11	megahit	97.63	1.23	2665586	74018	d__Bacteria;p__Firmicutes_A;c__Clostridia;o__Oscillospirales;f__Acutalibacteraceae;g__UBA6857;	Bacteria	Firmicutes_A	Clostridia	Oscillospirales	Acutalibacteraceae	UBA6857	unclassified	unclassified	5S ribosomal RNA	20	63	2613	252904	high
megahit_LCN11_bin.16	MAG-0816	LCN11	megahit	83.58	0	2076285	31236	d__Bacteria;p__Bacteroidota;c__Bacteroidia;o__Bacteroidales;f__Muribaculaceae;	Bacteria	Bacteroidota	Bacteroidia	Bacteroidales	Muribaculaceae	unclassified	unclassified	unclassified		20	96	2545	95274	medium
megahit_LCN11_bin.17	MAG-0817	LCN11	megahit	90.6	1.01	2135518	24039	d__Bacteria;p__Firmicutes_A;c__Clostridia;o__Lachnospirales;f__Lachnospiraceae;g__Acetivibrio_A;	Bacteria	Firmicutes_A	Clostridia	Lachnospirales	Lachnospiraceae	Acetivibrio_A	unclassified	unclassified		17	147	2518	95350	high
megahit_LCN11_bin.2	MAG-0818	LCN11	megahit	94.33	1.76	2565756	113289	d__Bacteria;p__Bacteroidota;c__Bacteroidia;o__Bacteroidales;f__Bacteroidaceae;g__Prevotellamassilia;	Bacteria	Bacteroidota	Bacteroidia	Bacteroidales	Bacteroidaceae	Prevotellamassilia	unclassified	unclassified	5S ribosomal RNA,5S ribosomal RNA (partial)	20	35	4771	188958	high
megahit_LCN11_bin.20	MAG-0819	LCN11	megahit	88.45	7.64	3295634	10738	d__Bacteria;p__Firmicutes_A;c__Clostridia;o__Lachnospirales;f__Lachnospiraceae;	Bacteria	Firmicutes_A	Clostridia	Lachnospirales	Lachnospiraceae	unclassified	unclassified	unclassified		16	409	2500	83948	medium
megahit_LCN11_bin.24	MAG-0820	LCN11	megahit	88.84	8.05	1995457	31086	d__Bacteria;p__Bacteroidota;c__Bacteroidia;o__Bacteroidales;f__Rikenellaceae;g__Alistipes;	Bacteria	Bacteroidota	Bacteroidia	Bacteroidales	Rikenellaceae	Alistipes	unclassified	unclassified	5S ribosomal RNA,5S ribosomal RNA	20	96	2885	137306	low
megahit_LCN11_bin.26	MAG-0821	LCN11	megahit	88.92	8.43	1844426	12864	d__Bacteria;p__Firmicutes;c__Bacilli;o__RFN20;f__CAG	Bacteria	Firmicutes	Bacilli	RFN20	CAG-449	unclassified	unclassified	unclassified	5S ribosomal RNA (partial),16S ribosomal RNA,5S ribosomal RNA (partial),5S ribosomal RNA,5S ribosomal RNA	19	196	2519	59048	low
megahit_LCN11_bin.32	MAG-0822	LCN11	megahit	93.82	4.7	1864993	22135	d__Bacteria;p__Firmicutes;c__Bacilli;o__RFN20;	Bacteria	Firmicutes	Bacilli	RFN20	unclassified	unclassified	unclassified	unclassified		20	120	2606	84643	high
megahit_LCN11_bin.45	MAG-0823	LCN11	megahit	94.83	9.48	2019800	13555	d__Bacteria;p__Bacteroidota;c__Bacteroidia;o__Bacteroidales;f__Rikenellaceae;g__Alistipes;	Bacteria	Bacteroidota	Bacteroidia	Bacteroidales	Rikenellaceae	Alistipes	unclassified	unclassified	5S ribosomal RNA,5S ribosomal RNA	16	195	2516	73362	low
megahit_LCN11_bin.47	MAG-0824	LCN11	megahit	87	4.05	1758319	22211	d__Bacteria;p__Firmicutes_A;c__Clostridia;o__Oscillospirales;f__CAG	Bacteria	Firmicutes_A	Clostridia	Oscillospirales	CAG-272	UBA1740	unclassified	unclassified		16	120	2574	56650	medium
megahit_LCN11_bin.52	MAG-0825	LCN11	megahit	98.25	0.35	2280431	91332	d__Bacteria;p__Spirochaetota;c__Spirochaetia;o__Treponematales;f__Treponemataceae;	Bacteria	Spirochaetota	Spirochaetia	Treponematales	Treponemataceae	unclassified	unclassified	unclassified	5S ribosomal RNA,5S ribosomal RNA	20	60	2687	215708	high
megahit_LCN11_bin.74	MAG-0826	LCN11	megahit	85.14	4.01	1520889	33490	d__Bacteria;p__Bacteroidota;c__Bacteroidia;o__Bacteroidales;f__Rikenellaceae;g__Alistipes;	Bacteria	Bacteroidota	Bacteroidia	Bacteroidales	Rikenellaceae	Alistipes	unclassified	unclassified		18	68	2522	110472	medium
megahit_LCN11_bin.87	MAG-0827	LCN11	megahit	85.41	5.58	1660410	9900	d__Bacteria;p__Bacteroidota;c__Bacteroidia;o__Bacteroidales;f__Rikenellaceae;g__Alistipes;	Bacteria	Bacteroidota	Bacteroidia	Bacteroidales	Rikenellaceae	Alistipes	unclassified	unclassified	16S ribosomal RNA (partial),5S ribosomal RNA	12	216	2536	31832	medium
megahit_LCN11_bin.9	MAG-0828	LCN11	megahit	92.25	9.01	2007522	16320	d__Bacteria;p__Firmicutes_A;c__Clostridia;o__4C28d	Bacteria	Firmicutes_A	Clostridia	4C28d-15	CAG-727	QALS01	unclassified	unclassified	5S ribosomal RNA,5S ribosomal RNA	17	183	2540	53587	low
megahit_LCN12_bin.16	MAG-0829	LCN12	megahit	82.79	6.25	1246786	7931	d__Bacteria;p__Firmicutes_A;c__Clostridia;o__4C28d	Bacteria	Firmicutes_A	Clostridia	4C28d-15	CAG-727	QALS01	unclassified	unclassified	5S ribosomal RNA (partial),5S ribosomal RNA (partial)	12	185	2528	38884	medium
megahit_LCN12_bin.17	MAG-0830	LCN12	megahit	92.88	3.85	1978096	37827	d__Bacteria;p__Bacteroidota;c__Bacteroidia;o__Bacteroidales;f__Rikenellaceae;g__Alistipes;	Bacteria	Bacteroidota	Bacteroidia	Bacteroidales	Rikenellaceae	Alistipes	unclassified	unclassified	5S ribosomal RNA (partial),5S ribosomal RNA	19	84	2656	82787	high
megahit_LCN12_bin.18	MAG-0831	LCN12	megahit	83.26	3.23	2207003	19345	d__Bacteria;p__Bacteroidota;c__Bacteroidia;o__Bacteroidales;f__F082;g__F082;	Bacteria	Bacteroidota	Bacteroidia	Bacteroidales	F082	F082	unclassified	unclassified	5S ribosomal RNA,5S ribosomal RNA	19	172	2511	65020	medium
megahit_LCN12_bin.41	MAG-0832	LCN12	megahit	87.62	6.94	2272388	22816	d__Bacteria;p__Bacteroidota;c__Bacteroidia;o__Bacteroidales;f__Bacteroidaceae;g__Prevotellamassilia;	Bacteria	Bacteroidota	Bacteroidia	Bacteroidales	Bacteroidaceae	Prevotellamassilia	unclassified	unclassified	5S ribosomal RNA,5S ribosomal RNA,5S ribosomal RNA	15	145	2689	67965	medium
megahit_LCN12_bin.44	MAG-0833	LCN12	megahit	81.09	1.08	1796693	10586	d__Bacteria;p__Bacteroidota;c__Bacteroidia;o__Bacteroidales;f__P3;g__UBA1219;	Bacteria	Bacteroidota	Bacteroidia	Bacteroidales	P3	UBA1219	unclassified	unclassified		18	213	2572	29367	medium
megahit_LCN12_bin.5	MAG-0834	LCN12	megahit	95.97	0	2596202	33403	d__Bacteria;p__Firmicutes_A;c__Clostridia;o__Oscillospirales;f__Acutalibacteraceae;g__Ruminococcus_E;	Bacteria	Firmicutes_A	Clostridia	Oscillospirales	Acutalibacteraceae	Ruminococcus_E	unclassified	unclassified	16S ribosomal RNA (partial),5S ribosomal RNA,5S ribosomal RNA,5S ribosomal RNA	17	124	2633	86139	high
megahit_LCN12_bin.56	MAG-0835	LCN12	megahit	81.11	0	2478577	37814	d__Bacteria;p__Bacteroidota;c__Bacteroidia;o__Bacteroidales;f__Bacteroidaceae;	Bacteria	Bacteroidota	Bacteroidia	Bacteroidales	Bacteroidaceae	unclassified	unclassified	unclassified	5S ribosomal RNA,5S ribosomal RNA,5S ribosomal RNA,5S ribosomal RNA	20	100	2537	117135	medium
megahit_LCN12_bin.63	MAG-0836	LCN12	megahit	82.51	4.87	2416878	14278	d__Bacteria;p__Firmicutes_A;c__Clostridia;o__Oscillospirales;f__Oscillospiraceae;g__CAG	Bacteria	Firmicutes_A	Clostridia	Oscillospirales	Oscillospiraceae	CAG-110	unclassified	unclassified	5S ribosomal RNA	19	245	2509	57926	medium
megahit_LCN12_bin.64	MAG-0837	LCN12	megahit	92.18	0.34	1863750	19299	d__Bacteria;p__Firmicutes_A;c__Clostridia;o__Oscillospirales;f__CAG	Bacteria	Firmicutes_A	Clostridia	Oscillospirales	CAG-272	Firm-07	unclassified	unclassified		18	140	2658	87490	high
megahit_LCN13_bin.17	MAG-0838	LCN13	megahit	86.68	1.44	1760861	21833	d__Bacteria;p__Bacteroidota;c__Bacteroidia;o__Bacteroidales;f__Rikenellaceae;g__Alistipes;	Bacteria	Bacteroidota	Bacteroidia	Bacteroidales	Rikenellaceae	Alistipes	unclassified	unclassified	5S ribosomal RNA,5S ribosomal RNA,5S ribosomal RNA	17	123	2638	72631	medium
megahit_LCN13_bin.21	MAG-0839	LCN13	megahit	82.58	1.63	1999547	11511	d__Bacteria;p__Bacteroidota;c__Bacteroidia;o__Bacteroidales;f__Bacteroidaceae;g__UBA4372;	Bacteria	Bacteroidota	Bacteroidia	Bacteroidales	Bacteroidaceae	UBA4372	unclassified	unclassified	5S ribosomal RNA	19	210	2626	34785	medium
megahit_LCN13_bin.31	MAG-0840	LCN13	megahit	94.91	2.68	2289799	16146	d__Bacteria;p__Firmicutes_A;c__Clostridia;o__Oscillospirales;f__CAG	Bacteria	Firmicutes_A	Clostridia	Oscillospirales	CAG-272	CAG-448	unclassified	unclassified		19	201	2513	49833	high
megahit_LCN13_bin.41	MAG-0841	LCN13	megahit	91.28	0.02	2439059	28530	d__Bacteria;p__Firmicutes_A;c__Clostridia;o__Lachnospirales;f__Lachnospiraceae;g__CAG	Bacteria	Firmicutes_A	Clostridia	Lachnospirales	Lachnospiraceae	CAG-590	unclassified	unclassified	16S ribosomal RNA (partial)	20	136	2541	90738	high
megahit_LCN13_bin.47	MAG-0842	LCN13	megahit	90.12	2.24	2042162	13666	d__Bacteria;p__Firmicutes_A;c__Clostridia;o__Oscillospirales;f__CAG	Bacteria	Firmicutes_A	Clostridia	Oscillospirales	CAG-272	Firm-07	unclassified	unclassified		20	187	2520	57761	high
megahit_LCN13_bin.50	MAG-0843	LCN13	megahit	88.85	1.38	2155873	32203	d__Bacteria;p__Verrucomicrobiota;c__Kiritimatiellae;o__RFP12;	Bacteria	Verrucomicrobiota	Kiritimatiellae	RFP12	unclassified	unclassified	unclassified	unclassified		20	82	4003	86883	medium
megahit_LCN13_bin.54	MAG-0844	LCN13	megahit	89.18	1.88	2214890	36595	d__Bacteria;p__Bacteroidota;c__Bacteroidia;o__Bacteroidales;f__F082;g__F082;	Bacteria	Bacteroidota	Bacteroidia	Bacteroidales	F082	F082	unclassified	unclassified	5S ribosomal RNA	19	85	2782	92499	medium
megahit_LCN13_bin.59	MAG-0845	LCN13	megahit	92.66	2.16	1596639	51297	d__Bacteria;p__Bacteroidota;c__Bacteroidia;o__Bacteroidales;f__Rikenellaceae;g__Alistipes;	Bacteria	Bacteroidota	Bacteroidia	Bacteroidales	Rikenellaceae	Alistipes	unclassified	unclassified	5S ribosomal RNA	19	57	2646	108746	high
megahit_LCN13_bin.63	MAG-0846	LCN13	megahit	91.81	0.4	1535513	28153	d__Bacteria;p__Firmicutes_A;c__Clostridia;o__4C28d	Bacteria	Firmicutes_A	Clostridia	4C28d-15	CAG-727	QALS01	unclassified	unclassified	5S ribosomal RNA	20	85	2522	75712	high
megahit_LCN13_bin.66	MAG-0847	LCN13	megahit	83.63	1.4	1871662	10139	d__Bacteria;p__Firmicutes_A;c__Clostridia;o__Oscillospirales;f__CAG	Bacteria	Firmicutes_A	Clostridia	Oscillospirales	CAG-272	QALR01	unclassified	unclassified		13	236	2501	55330	medium
megahit_LCN13_bin.70	MAG-0848	LCN13	megahit	96.81	2.46	1970762	23054	d__Bacteria;p__Firmicutes_A;c__Clostridia;o__Monoglobales;f__UBA1381;	Bacteria	Firmicutes_A	Clostridia	Monoglobales	UBA1381	unclassified	unclassified	unclassified	5S ribosomal RNA,5S ribosomal RNA	17	137	2525	92412	high
megahit_LCN13_bin.8	MAG-0849	LCN13	megahit	98.31	0	1220195	64969	d__Bacteria;p__Firmicutes;c__Bacilli;o__RFN20;f__CAG	Bacteria	Firmicutes	Bacilli	RFN20	CAG-826	unclassified	unclassified	unclassified	16S ribosomal RNA,23S ribosomal RNA,5S ribosomal RNA (partial)	20	31	2967	159677	high
megahit_LCN13_bin.80	MAG-0850	LCN13	megahit	88.52	1.38	1715543	12824	d__Bacteria;p__Firmicutes_A;c__Clostridia;o__Oscillospirales;f__CAG	Bacteria	Firmicutes_A	Clostridia	Oscillospirales	CAG-272	CAG-448	unclassified	unclassified		15	175	2526	48210	medium
megahit_LCN13_bin.85	MAG-0851	LCN13	megahit	86.62	0.83	2364897	11578	d__Bacteria;p__Firmicutes_A;c__Clostridia;o__4C28d	Bacteria	Firmicutes_A	Clostridia	4C28d-15	CAG-727	QALS01	unclassified	unclassified	5S ribosomal RNA (partial)	20	270	2526	47047	medium
megahit_LCN14_bin.21	MAG-0852	LCN14	megahit	97.33	0	1502525	19753	d__Bacteria;p__Firmicutes;c__Bacilli;o__ML615J	Bacteria	Firmicutes	Bacilli	ML615J-28	CAG-313	unclassified	unclassified	unclassified	5S ribosomal RNA,5S ribosomal RNA	20	117	2578	60825	high
megahit_LCN14_bin.3	MAG-0853	LCN14	megahit	90.55	3.24	2382316	28118	d__Bacteria;p__Firmicutes_A;c__Clostridia;o__Oscillospirales;f__Oscillospiraceae;g__CAG	Bacteria	Firmicutes_A	Clostridia	Oscillospirales	Oscillospiraceae	CAG-110	unclassified	unclassified	5S ribosomal RNA	20	128	2522	204107	high
megahit_LCN14_bin.34	MAG-0854	LCN14	megahit	90.34	3.44	2365175	33495	d__Bacteria;p__Bacteroidota;c__Bacteroidia;o__Bacteroidales;f__Bacteroidaceae;	Bacteria	Bacteroidota	Bacteroidia	Bacteroidales	Bacteroidaceae	unclassified	unclassified	unclassified	16S ribosomal RNA (partial),5S ribosomal RNA	17	113	2835	72236	high
megahit_LCN14_bin.38	MAG-0855	LCN14	megahit	92.73	2.03	2619861	11758	d__Bacteria;p__Firmicutes_A;c__Clostridia;o__Oscillospirales;f__CAG	Bacteria	Firmicutes_A	Clostridia	Oscillospirales	CAG-272	CAG-448	unclassified	unclassified		17	283	2508	59561	high
megahit_LCN14_bin.41	MAG-0856	LCN14	megahit	87.5	1.88	1071896	8509	d__Bacteria;p__Firmicutes_A;c__Clostridia;o__4C28d	Bacteria	Firmicutes_A	Clostridia	4C28d-15	CAG-727	unclassified	unclassified	unclassified	16S ribosomal RNA (partial)	8	143	2502	29379	medium
megahit_LCN14_bin.55	MAG-0857	LCN14	megahit	98.12	2.11	1627520	17189	d__Bacteria;p__Bacteroidota;c__Bacteroidia;o__Bacteroidales;f__Paludibacteraceae;g__RUG163;	Bacteria	Bacteroidota	Bacteroidia	Bacteroidales	Paludibacteraceae	RUG163	unclassified	unclassified	5S ribosomal RNA (partial),5S ribosomal RNA,5S ribosomal RNA (partial)	20	125	2588	63079	high
megahit_LCN14_bin.56	MAG-0858	LCN14	megahit	98.1	0.99	2244195	99990	d__Bacteria;p__Bacteroidota;c__Bacteroidia;o__Bacteroidales;f__Rikenellaceae;g__Alistipes;	Bacteria	Bacteroidota	Bacteroidia	Bacteroidales	Rikenellaceae	Alistipes	unclassified	unclassified	5S ribosomal RNA,5S ribosomal RNA	20	36	3117	183054	high
megahit_LCN14_bin.65	MAG-0859	LCN14	megahit	80.07	1.01	1298697	21875	d__Bacteria;p__Firmicutes_A;c__Clostridia;o__4C28d	Bacteria	Firmicutes_A	Clostridia	4C28d-15	CAG-917	unclassified	unclassified	unclassified	16S ribosomal RNA (partial),5S ribosomal RNA	20	86	2528	87457	medium
megahit_LCN14_bin.67	MAG-0860	LCN14	megahit	82.17	1.9	2092981	7922	d__Bacteria;p__Firmicutes_A;c__Clostridia;o__Oscillospirales;f__Acutalibacteraceae;	Bacteria	Firmicutes_A	Clostridia	Oscillospirales	Acutalibacteraceae	unclassified	unclassified	unclassified		14	309	2506	33626	medium
megahit_LCN14_bin.69	MAG-0861	LCN14	megahit	89.63	4.55	2221044	31600	d__Bacteria;p__Bacteroidota;c__Bacteroidia;o__Bacteroidales;f__Bacteroidaceae;	Bacteria	Bacteroidota	Bacteroidia	Bacteroidales	Bacteroidaceae	unclassified	unclassified	unclassified	5S ribosomal RNA	19	104	2808	91124	medium
megahit_LCN14_bin.77	MAG-0862	LCN14	megahit	92.06	0.22	2056776	37449	d__Bacteria;p__Firmicutes_A;c__Clostridia;o__Oscillospirales;f__CAG	Bacteria	Firmicutes_A	Clostridia	Oscillospirales	CAG-272	unclassified	unclassified	unclassified		18	110	2521	129894	high
megahit_LCN14_bin.8	MAG-0863	LCN14	megahit	97.63	0.69	2678333	127314	d__Bacteria;p__Firmicutes_A;c__Clostridia;o__Oscillospirales;f__Acutalibacteraceae;g__UBA6857;	Bacteria	Firmicutes_A	Clostridia	Oscillospirales	Acutalibacteraceae	UBA6857	unclassified	unclassified	5S ribosomal RNA,5S ribosomal RNA	20	48	2829	243228	high
megahit_LCN15_bin.18	MAG-0864	LCN15	megahit	85.74	0.67	1536394	123651	d__Bacteria;p__Firmicutes_A;c__Clostridia;o__Oscillospirales;f__CAG	Bacteria	Firmicutes_A	Clostridia	Oscillospirales	CAG-272	unclassified	unclassified	unclassified	5S ribosomal RNA,5S ribosomal RNA	20	25	2560	267282	medium
megahit_LCN15_bin.30	MAG-0865	LCN15	megahit	87.47	0.02	1389259	14761	d__Bacteria;p__Firmicutes_A;c__Clostridia;o__Oscillospirales;f__Acutalibacteraceae;	Bacteria	Firmicutes_A	Clostridia	Oscillospirales	Acutalibacteraceae	unclassified	unclassified	unclassified	5S ribosomal RNA (partial)	14	125	2513	92625	medium
megahit_LCN15_bin.37	MAG-0866	LCN15	megahit	80.5	2.59	2528752	26537	d__Bacteria;p__Bacteroidota;c__Bacteroidia;o__Bacteroidales;f__Bacteroidaceae;	Bacteria	Bacteroidota	Bacteroidia	Bacteroidales	Bacteroidaceae	unclassified	unclassified	unclassified	5S ribosomal RNA	18	151	2516	132209	medium
megahit_LCN15_bin.4	MAG-0867	LCN15	megahit	95.08	0	2351375	43066	d__Bacteria;p__Firmicutes_A;c__Clostridia;o__Oscillospirales;f__Acutalibacteraceae;g__DTU089_A;	Bacteria	Firmicutes_A	Clostridia	Oscillospirales	Acutalibacteraceae	DTU089_A	unclassified	unclassified	5S ribosomal RNA,5S ribosomal RNA,5S ribosomal RNA	20	78	2851	290030	high
megahit_LCN15_bin.46	MAG-0868	LCN15	megahit	89.15	0.25	2077066	27660	d__Bacteria;p__Bacteroidota;c__Bacteroidia;o__Bacteroidales;f__Bacteroidaceae;g__Prevotellamassilia;	Bacteria	Bacteroidota	Bacteroidia	Bacteroidales	Bacteroidaceae	Prevotellamassilia	unclassified	unclassified		16	110	2873	70332	medium
megahit_LCN15_bin.48	MAG-0869	LCN15	megahit	95.16	1.85	1933583	26031	d__Bacteria;p__Firmicutes_A;c__Clostridia;o__Oscillospirales;f__CAG	Bacteria	Firmicutes_A	Clostridia	Oscillospirales	CAG-272	unclassified	unclassified	unclassified	5S ribosomal RNA,5S ribosomal RNA	20	109	2548	85532	high
megahit_LCN15_bin.5	MAG-0870	LCN15	megahit	93.38	0	2285972	78420	d__Bacteria;p__Firmicutes_A;c__Clostridia;o__Oscillospirales;f__Acutalibacteraceae;g__UBA6857;	Bacteria	Firmicutes_A	Clostridia	Oscillospirales	Acutalibacteraceae	UBA6857	unclassified	unclassified	5S ribosomal RNA,5S ribosomal RNA	20	44	3143	269239	high
megahit_LCN15_bin.54	MAG-0871	LCN15	megahit	93.32	2.16	1846229	26291	d__Bacteria;p__Bacteroidota;c__Bacteroidia;o__Bacteroidales;f__Rikenellaceae;g__Alistipes;	Bacteria	Bacteroidota	Bacteroidia	Bacteroidales	Rikenellaceae	Alistipes	unclassified	unclassified	23S ribosomal RNA (partial),5S ribosomal RNA,5S ribosomal RNA,5S ribosomal RNA,5S ribosomal RNA	16	107	2610	89441	high
megahit_LCN15_bin.55	MAG-0872	LCN15	megahit	97.99	2.35	2559638	55795	d__Bacteria;p__Firmicutes_A;c__Clostridia;o__Lachnospirales;f__Lachnospiraceae;g__CAG	Bacteria	Firmicutes_A	Clostridia	Lachnospirales	Lachnospiraceae	CAG-303	unclassified	unclassified		19	90	2502	142304	high
megahit_LCN17_bin.11	MAG-0873	LCN17	megahit	93.15	0	1380820	75664	d__Bacteria;p__Firmicutes_A;c__Clostridia;o__4C28d	Bacteria	Firmicutes_A	Clostridia	4C28d-15	RUG350	unclassified	unclassified	unclassified	5S ribosomal RNA	20	21	6915	231338	high
megahit_LCN17_bin.25	MAG-0874	LCN17	megahit	85.7	1.01	2201139	25196	d__Bacteria;p__Firmicutes_A;c__Clostridia;o__Oscillospirales;f__CAG	Bacteria	Firmicutes_A	Clostridia	Oscillospirales	CAG-272	unclassified	unclassified	unclassified		13	121	2500	82607	medium
megahit_LCN17_bin.48	MAG-0875	LCN17	megahit	83.62	9.91	1839753	17197	d__Bacteria;p__Firmicutes_A;c__Clostridia;o__Oscillospirales;f__Acutalibacteraceae;g__UBA6857;	Bacteria	Firmicutes_A	Clostridia	Oscillospirales	Acutalibacteraceae	UBA6857	unclassified	unclassified	5S ribosomal RNA,5S ribosomal RNA	14	145	2551	55844	low
megahit_LCN17_bin.51	MAG-0876	LCN17	megahit	94.97	0.67	1441887	73559	d__Bacteria;p__Firmicutes_A;c__Clostridia;o__Oscillospirales;f__Acutalibacteraceae;	Bacteria	Firmicutes_A	Clostridia	Oscillospirales	Acutalibacteraceae	unclassified	unclassified	unclassified	5S ribosomal RNA,5S ribosomal RNA	20	31	2649	157425	high
megahit_LCN17_bin.61	MAG-0877	LCN17	megahit	90.66	2.01	2715183	25456	d__Bacteria;p__Firmicutes_A;c__Clostridia;o__Oscillospirales;f__CAG	Bacteria	Firmicutes_A	Clostridia	Oscillospirales	CAG-272	CAG-448	unclassified	unclassified		14	183	2610	128447	high
megahit_LCN17_bin.63	MAG-0878	LCN17	megahit	89.46	4.96	1427961	8538	d__Bacteria;p__Firmicutes_A;c__Clostridia;o__Oscillospirales;f__CAG	Bacteria	Firmicutes_A	Clostridia	Oscillospirales	CAG-272	CAG-448	unclassified	unclassified	16S ribosomal RNA (partial)	11	203	2502	25007	medium
megahit_LCN17_bin.69	MAG-0879	LCN17	megahit	82.51	7.38	2170686	13883	d__Bacteria;p__Firmicutes_A;c__Clostridia;o__Oscillospirales;f__CAG	Bacteria	Firmicutes_A	Clostridia	Oscillospirales	CAG-272	unclassified	unclassified	unclassified		17	197	2571	56673	low
megahit_LCN17_bin.73	MAG-0880	LCN17	megahit	94.21	1.68	1855678	20913	d__Bacteria;p__Bacteroidota;c__Bacteroidia;o__Bacteroidales;f__Rikenellaceae;g__Alistipes;	Bacteria	Bacteroidota	Bacteroidia	Bacteroidales	Rikenellaceae	Alistipes	unclassified	unclassified	5S ribosomal RNA	18	125	2505	63497	high
megahit_LCN17_bin.74	MAG-0881	LCN17	megahit	88.24	1.61	1210134	15640	d__Bacteria;p__Firmicutes_A;c__Clostridia;o__4C28d	Bacteria	Firmicutes_A	Clostridia	4C28d-15	RUG350	unclassified	unclassified	unclassified	5S ribosomal RNA	16	102	2540	73571	medium
megahit_LCN17_bin.78	MAG-0882	LCN17	megahit	87.41	0.71	1622008	23868	d__Bacteria;p__Firmicutes_A;c__Clostridia;o__Oscillospirales;f__CAG	Bacteria	Firmicutes_A	Clostridia	Oscillospirales	CAG-272	UBA1740	unclassified	unclassified		20	119	2565	97643	medium
megahit_LCN17_bin.9	MAG-0883	LCN17	megahit	85.4	0.84	2063393	11743	d__Bacteria;p__Firmicutes_A;c__Clostridia;o__Oscillospirales;f__Acutalibacteraceae;g__UBA1081;	Bacteria	Firmicutes_A	Clostridia	Oscillospirales	Acutalibacteraceae	UBA1081	unclassified	unclassified		12	217	2543	53702	medium
megahit_LCN17_bin.93	MAG-0884	LCN17	megahit	82.48	2.63	1396159	8369	d__Bacteria;p__Firmicutes_A;c__Clostridia;o__Oscillospirales;f__CAG	Bacteria	Firmicutes_A	Clostridia	Oscillospirales	CAG-272	unclassified	unclassified	unclassified		13	201	2503	29355	medium
megahit_LCN17_bin.99	MAG-0885	LCN17	megahit	80.76	0.03	1225207	9558	d__Bacteria;p__Firmicutes_A;c__Clostridia;o__4C28d	Bacteria	Firmicutes_A	Clostridia	4C28d-15	CAG-314	CAG-1435	unclassified	unclassified	23S ribosomal RNA (partial)	15	162	2501	39274	medium
megahit_LCN18_bin.15	MAG-0886	LCN18	megahit	94.38	0.44	1332323	47764	d__Bacteria;p__Firmicutes;c__Bacilli;o__RFN20;f__CAG	Bacteria	Firmicutes	Bacilli	RFN20	CAG-826	unclassified	unclassified	unclassified	16S ribosomal RNA,23S ribosomal RNA,5S ribosomal RNA (partial)	20	44	2839	190842	high
megahit_LCN18_bin.22	MAG-0887	LCN18	megahit	90.32	0.13	2477305	40089	d__Bacteria;p__Firmicutes_A;c__Clostridia;o__Oscillospirales;f__CAG	Bacteria	Firmicutes_A	Clostridia	Oscillospirales	CAG-272	UBA1740	unclassified	unclassified		20	98	2521	154666	high
megahit_LCN18_bin.24	MAG-0888	LCN18	megahit	83.89	3.07	1702900	18673	d__Bacteria;p__Firmicutes_A;c__Clostridia;o__Oscillospirales;f__CAG	Bacteria	Firmicutes_A	Clostridia	Oscillospirales	CAG-272	UBA1740	unclassified	unclassified		14	147	2525	92305	medium
megahit_LCN18_bin.25	MAG-0889	LCN18	megahit	98.41	0.29	1845788	70725	d__Bacteria;p__Firmicutes_A;c__Clostridia;o__Oscillospirales;f__CAG	Bacteria	Firmicutes_A	Clostridia	Oscillospirales	CAG-272	unclassified	unclassified	unclassified	23S ribosomal RNA (partial)	18	46	3312	170970	high
megahit_LCN18_bin.31	MAG-0890	LCN18	megahit	97.99	0	1709441	261963	d__Bacteria;p__Firmicutes_A;c__Clostridia;o__Oscillospirales;f__Acutalibacteraceae;	Bacteria	Firmicutes_A	Clostridia	Oscillospirales	Acutalibacteraceae	unclassified	unclassified	unclassified	5S ribosomal RNA,5S ribosomal RNA,5S ribosomal RNA	20	12	3920	519234	high
megahit_LCN18_bin.33	MAG-0891	LCN18	megahit	80.81	2.71	1370935	18834	d__Bacteria;p__Firmicutes_A;c__Clostridia;o__Oscillospirales;f__CAG	Bacteria	Firmicutes_A	Clostridia	Oscillospirales	CAG-272	UBA1740	unclassified	unclassified		16	96	2523	72642	medium
megahit_LCN18_bin.36	MAG-0892	LCN18	megahit	91.25	1.34	2082594	14566	d__Bacteria;p__Firmicutes_A;c__Clostridia;o__Oscillospirales;f__Acutalibacteraceae;g__UBA6857;	Bacteria	Firmicutes_A	Clostridia	Oscillospirales	Acutalibacteraceae	UBA6857	unclassified	unclassified	5S ribosomal RNA	20	206	2518	41524	high
megahit_LCN18_bin.37	MAG-0893	LCN18	megahit	83.95	0	1891528	9306	d__Bacteria;p__Firmicutes_A;c__Clostridia;o__Oscillospirales;f__CAG	Bacteria	Firmicutes_A	Clostridia	Oscillospirales	CAG-272	unclassified	unclassified	unclassified		12	237	2504	30125	medium
megahit_LCN18_bin.38	MAG-0894	LCN18	megahit	87.84	4.54	2443656	47807	d__Bacteria;p__Bacteroidota;c__Bacteroidia;o__Bacteroidales;f__Bacteroidaceae;	Bacteria	Bacteroidota	Bacteroidia	Bacteroidales	Bacteroidaceae	unclassified	unclassified	unclassified	5S ribosomal RNA,5S ribosomal RNA	20	102	2525	93226	medium
megahit_LCN18_bin.47	MAG-0895	LCN18	megahit	89.24	0	1376931	21733	d__Bacteria;p__Firmicutes_A;c__Clostridia;o__Oscillospirales;f__CAG	Bacteria	Firmicutes_A	Clostridia	Oscillospirales	CAG-272	Firm-07	unclassified	unclassified		16	90	3007	90473	medium
megahit_LCN18_bin.53	MAG-0896	LCN18	megahit	90.41	0.97	1171583	8877	d__Bacteria;p__Firmicutes_A;c__Clostridia;o__4C28d	Bacteria	Firmicutes_A	Clostridia	4C28d-15	CAG-727	QALS01	unclassified	unclassified		14	154	2531	39206	high
megahit_LCN18_bin.62	MAG-0897	LCN18	megahit	97.61	3.38	1859186	53142	d__Bacteria;p__Bacteroidota;c__Bacteroidia;o__Bacteroidales;f__Rikenellaceae;g__Alistipes;	Bacteria	Bacteroidota	Bacteroidia	Bacteroidales	Rikenellaceae	Alistipes	unclassified	unclassified	5S ribosomal RNA,5S ribosomal RNA	19	61	2575	113703	high
megahit_LCN18_bin.8	MAG-0898	LCN18	megahit	91.65	1.81	1310450	18568	d__Bacteria;p__Firmicutes_A;c__Clostridia;o__4C28d	Bacteria	Firmicutes_A	Clostridia	4C28d-15	CAG-727	QALS01	unclassified	unclassified	5S ribosomal RNA,5S ribosomal RNA,5S ribosomal RNA,5S ribosomal RNA	16	98	2591	55460	high
megahit_LCN19_bin.1	MAG-0899	LCN19	megahit	89.65	2.44	2393181	21701	d__Bacteria;p__Bacteroidota;c__Bacteroidia;o__Bacteroidales;f__Bacteroidaceae;	Bacteria	Bacteroidota	Bacteroidia	Bacteroidales	Bacteroidaceae	unclassified	unclassified	unclassified		18	154	2507	124119	medium
megahit_LCN19_bin.16	MAG-0900	LCN19	megahit	87.97	0.12	2202338	27800	d__Bacteria;p__Bacteroidota;c__Bacteroidia;o__Bacteroidales;f__Bacteroidaceae;	Bacteria	Bacteroidota	Bacteroidia	Bacteroidales	Bacteroidaceae	unclassified	unclassified	unclassified	5S ribosomal RNA,5S ribosomal RNA,5S ribosomal RNA	19	117	2504	98481	medium
megahit_LCN19_bin.24	MAG-0901	LCN19	megahit	96.5	0	2576915	72972	d__Bacteria;p__Spirochaetota;c__Spirochaetia;o__Treponematales;f__Treponemataceae;g__Treponema_D;	Bacteria	Spirochaetota	Spirochaetia	Treponematales	Treponemataceae	Treponema_D	unclassified	unclassified	16S ribosomal RNA,5S ribosomal RNA,5S ribosomal RNA,5S ribosomal RNA,5S ribosomal RNA	20	57	2846	195105	high
megahit_LCN19_bin.25	MAG-0902	LCN19	megahit	87.17	1.76	1687883	14467	d__Bacteria;p__Firmicutes_A;c__Clostridia;o__Oscillospirales;f__CAG	Bacteria	Firmicutes_A	Clostridia	Oscillospirales	CAG-272	unclassified	unclassified	unclassified		12	160	2546	51864	medium
megahit_LCN19_bin.4	MAG-0903	LCN19	megahit	96.64	3.36	2587666	105906	d__Bacteria;p__Firmicutes_A;c__Clostridia;o__Oscillospirales;f__Acutalibacteraceae;	Bacteria	Firmicutes_A	Clostridia	Oscillospirales	Acutalibacteraceae	unclassified	unclassified	unclassified	5S ribosomal RNA,5S ribosomal RNA	20	37	2789	319119	high
megahit_LCN19_bin.41	MAG-0904	LCN19	megahit	92.04	3.36	2539679	22617	d__Bacteria;p__Firmicutes_A;c__Clostridia;o__Lachnospirales;f__Lachnospiraceae;	Bacteria	Firmicutes_A	Clostridia	Lachnospirales	Lachnospiraceae	unclassified	unclassified	unclassified		20	164	2525	86646	high
megahit_LCN19_bin.52	MAG-0905	LCN19	megahit	91.08	4.44	1815071	11152	d__Bacteria;p__Firmicutes_A;c__Clostridia;o__4C28d	Bacteria	Firmicutes_A	Clostridia	4C28d-15	CAG-727	QALS01	unclassified	unclassified	5S ribosomal RNA	20	218	2516	36351	high
megahit_LCN19_bin.56	MAG-0906	LCN19	megahit	95.97	0.73	1722964	164003	d__Bacteria;p__Firmicutes_A;c__Clostridia;o__Oscillospirales;f__Acutalibacteraceae;	Bacteria	Firmicutes_A	Clostridia	Oscillospirales	Acutalibacteraceae	unclassified	unclassified	unclassified	5S ribosomal RNA,5S ribosomal RNA	20	32	3284	356743	high
megahit_LCN19_bin.65	MAG-0907	LCN19	megahit	87.38	7.91	2115694	11007	d__Bacteria;p__Firmicutes_A;c__Clostridia;o__Oscillospirales;f__Oscillospiraceae;g__CAG	Bacteria	Firmicutes_A	Clostridia	Oscillospirales	Oscillospiraceae	CAG-110	unclassified	unclassified	5S ribosomal RNA,5S ribosomal RNA	18	249	2580	63651	low
megahit_LCN19_bin.67	MAG-0908	LCN19	megahit	81.74	6.12	1576194	8353	d__Bacteria;p__Firmicutes_A;c__Clostridia;o__Oscillospirales;f__CAG	Bacteria	Firmicutes_A	Clostridia	Oscillospirales	CAG-272	unclassified	unclassified	unclassified		9	239	2503	34161	medium
megahit_LCN19_bin.7	MAG-0909	LCN19	megahit	87.74	1.44	1510130	9937	d__Bacteria;p__Bacteroidota;c__Bacteroidia;o__Bacteroidales;f__Rikenellaceae;g__Alistipes;	Bacteria	Bacteroidota	Bacteroidia	Bacteroidales	Rikenellaceae	Alistipes	unclassified	unclassified		15	189	2560	42786	medium
megahit_LCN2_bin.1	MAG-0910	LCN2	megahit	93.4	0.79	1358346	22332	d__Bacteria;p__Firmicutes_A;c__Clostridia;o__Oscillospirales;f__Acutalibacteraceae;g__UBA737;	Bacteria	Firmicutes_A	Clostridia	Oscillospirales	Acutalibacteraceae	UBA737	unclassified	unclassified	5S ribosomal RNA,5S ribosomal RNA	20	94	2580	47356	high
megahit_LCN2_bin.10	MAG-0911	LCN2	megahit	92.22	2.35	1705766	11622	d__Bacteria;p__Firmicutes_A;c__Clostridia;o__Oscillospirales;f__CAG	Bacteria	Firmicutes_A	Clostridia	Oscillospirales	CAG-272	CAG-448	unclassified	unclassified		15	178	2590	62167	high
megahit_LCN2_bin.20	MAG-0912	LCN2	megahit	87.29	5.2	1534752	20329	d__Bacteria;p__Firmicutes_A;c__Clostridia;o__Oscillospirales;f__Oscillospiraceae;g__CAG	Bacteria	Firmicutes_A	Clostridia	Oscillospirales	Oscillospiraceae	CAG-110	unclassified	unclassified	5S ribosomal RNA,5S ribosomal RNA	17	113	2550	40284	medium
megahit_LCN2_bin.21	MAG-0913	LCN2	megahit	88.32	1.67	2346545	31499	d__Bacteria;p__Bacteroidota;c__Bacteroidia;o__Bacteroidales;f__Bacteroidaceae;	Bacteria	Bacteroidota	Bacteroidia	Bacteroidales	Bacteroidaceae	unclassified	unclassified	unclassified		18	106	2669	115664	medium
megahit_LCN2_bin.22	MAG-0914	LCN2	megahit	94.19	4.33	1463369	81467	d__Bacteria;p__Firmicutes_A;c__Clostridia;o__4C28d	Bacteria	Firmicutes_A	Clostridia	4C28d-15	CAG-727	QALS01	unclassified	unclassified	5S ribosomal RNA,5S ribosomal RNA	20	40	3435	149880	high
megahit_LCN2_bin.25	MAG-0915	LCN2	megahit	89.09	0	2121013	9876	d__Bacteria;p__Firmicutes_A;c__Clostridia;o__Monoglobales;	Bacteria	Firmicutes_A	Clostridia	Monoglobales	unclassified	unclassified	unclassified	unclassified		18	270	2505	59123	medium
megahit_LCN2_bin.26	MAG-0916	LCN2	megahit	86.83	1.34	1860694	10654	d__Bacteria;p__Firmicutes_A;c__Clostridia;o__Oscillospirales;f__CAG	Bacteria	Firmicutes_A	Clostridia	Oscillospirales	CAG-272	unclassified	unclassified	unclassified	16S ribosomal RNA (partial)	18	227	2509	40713	medium
megahit_LCN2_bin.29	MAG-0917	LCN2	megahit	91.72	1.45	2409785	17868	d__Bacteria;p__Firmicutes_A;c__Clostridia;o__Oscillospirales;f__Acutalibacteraceae;g__UBA8612;	Bacteria	Firmicutes_A	Clostridia	Oscillospirales	Acutalibacteraceae	UBA8612	unclassified	unclassified	5S ribosomal RNA,5S ribosomal RNA,16S ribosomal RNA (partial)	19	183	2683	74423	high
megahit_LCN2_bin.51	MAG-0918	LCN2	megahit	89.26	0.67	1648871	59661	d__Bacteria;p__Firmicutes_A;c__Clostridia;	Bacteria	Firmicutes_A	Clostridia		unclassified	unclassified	unclassified	unclassified	5S ribosomal RNA	17	39	3110	128129	medium
megahit_LCN2_bin.68	MAG-0919	LCN2	megahit	92.86	0.37	2381036	61277	d__Bacteria;p__Bacteroidota;c__Bacteroidia;o__Bacteroidales;f__Bacteroidaceae;	Bacteria	Bacteroidota	Bacteroidia	Bacteroidales	Bacteroidaceae	unclassified	unclassified	unclassified	16S ribosomal RNA (partial),5S ribosomal RNA (partial),5S ribosomal RNA,16S ribosomal RNA (partial),5S ribosomal RNA,5S ribosomal RNA (partial),16S ribosomal RNA (partial)	17	52	2933	193692	high
megahit_LCN2_bin.72	MAG-0920	LCN2	megahit	97.85	2.65	3851472	70551	d__Bacteria;p__Firmicutes_A;c__Clostridia;o__Lachnospirales;f__Lachnospiraceae;g__Acetatifactor;	Bacteria	Firmicutes_A	Clostridia	Lachnospirales	Lachnospiraceae	Acetatifactor	unclassified	unclassified		20	97	2562	164393	high
megahit_LCN2_bin.78	MAG-0921	LCN2	megahit	94.9	0	2334920	29969	d__Bacteria;p__Firmicutes_A;c__Clostridia;o__Oscillospirales;f__Acutalibacteraceae;g__UBA1081;	Bacteria	Firmicutes_A	Clostridia	Oscillospirales	Acutalibacteraceae	UBA1081	unclassified	unclassified	5S ribosomal RNA	15	115	2626	100610	high
megahit_LCN2_bin.83	MAG-0922	LCN2	megahit	97.6	0.64	1954529	157418	d__Bacteria;p__Bacteroidota;c__Bacteroidia;o__Bacteroidales;f__Rikenellaceae;g__Alistipes;	Bacteria	Bacteroidota	Bacteroidia	Bacteroidales	Rikenellaceae	Alistipes	unclassified	unclassified	5S ribosomal RNA	20	19	8417	272727	high
megahit_LCN2_bin.86	MAG-0923	LCN2	megahit	89.6	1.12	1719832	17266	d__Bacteria;p__Firmicutes_A;c__Clostridia;o__Oscillospirales;f__CAG	Bacteria	Firmicutes_A	Clostridia	Oscillospirales	CAG-272	unclassified	unclassified	unclassified	5S ribosomal RNA,5S ribosomal RNA (partial)	19	146	2512	42386	medium
megahit_LCN20_bin.10	MAG-0924	LCN20	megahit	96.76	0.36	2372128	34544	d__Bacteria;p__Firmicutes_A;c__Clostridia;o__Oscillospirales;f__Acutalibacteraceae;g__Ruminococcus_E;	Bacteria	Firmicutes_A	Clostridia	Oscillospirales	Acutalibacteraceae	Ruminococcus_E	unclassified	unclassified	5S ribosomal RNA,5S ribosomal RNA	20	99	3307	114627	high
megahit_LCN20_bin.24	MAG-0925	LCN20	megahit	97.2	0.48	1741936	62825	d__Bacteria;p__Bacteroidota;c__Bacteroidia;o__Bacteroidales;f__Rikenellaceae;	Bacteria	Bacteroidota	Bacteroidia	Bacteroidales	Rikenellaceae	unclassified	unclassified	unclassified		19	45	3304	157130	high
megahit_LCN20_bin.40	MAG-0926	LCN20	megahit	93.99	1.44	1697081	100542	d__Bacteria;p__Bacteroidota;c__Bacteroidia;o__Bacteroidales;f__Rikenellaceae;g__Alistipes;	Bacteria	Bacteroidota	Bacteroidia	Bacteroidales	Rikenellaceae	Alistipes	unclassified	unclassified	5S ribosomal RNA,5S ribosomal RNA	20	35	3152	212158	high
megahit_LCN20_bin.45	MAG-0927	LCN20	megahit	93.86	6.51	2648833	14229	d__Bacteria;p__Firmicutes_A;c__Clostridia;o__Lachnospirales;f__Lachnospiraceae;	Bacteria	Firmicutes_A	Clostridia	Lachnospirales	Lachnospiraceae	unclassified	unclassified	unclassified	16S ribosomal RNA (partial)	15	259	2510	59540	medium
megahit_LCN21_bin.103	MAG-0928	LCN21	megahit	93.26	0	1373194	61003	d__Bacteria;p__Elusimicrobiota;c__Elusimicrobia;o__Elusimicrobiales;f__Elusimicrobiaceae;g__UBA1436;	Bacteria	Elusimicrobiota	Elusimicrobia	Elusimicrobiales	Elusimicrobiaceae	UBA1436	unclassified	unclassified	16S ribosomal RNA	20	39	3097	130575	high
megahit_LCN21_bin.106	MAG-0929	LCN21	megahit	95.63	2.39	3284431	62360	d__Bacteria;p__Firmicutes_A;c__Clostridia;o__Oscillospirales;f__CAG	Bacteria	Firmicutes_A	Clostridia	Oscillospirales	CAG-272	CAG-448	unclassified	unclassified	16S ribosomal RNA (partial),5S ribosomal RNA (partial)	20	127	2549	177209	high
megahit_LCN21_bin.126	MAG-0930	LCN21	megahit	89.91	6.68	2089844	12376	d__Bacteria;p__Firmicutes_A;c__Clostridia;o__Oscillospirales;f__CAG	Bacteria	Firmicutes_A	Clostridia	Oscillospirales	CAG-272	QALR01	unclassified	unclassified		18	219	2511	36882	medium
megahit_LCN21_bin.128	MAG-0931	LCN21	megahit	86.25	4	2400271	52675	d__Bacteria;p__Bacteroidota;c__Bacteroidia;o__Bacteroidales;f__UBA932;g__RC9;	Bacteria	Bacteroidota	Bacteroidia	Bacteroidales	UBA932	RC9	unclassified	unclassified	5S ribosomal RNA	16	89	2599	166362	medium
megahit_LCN21_bin.17	MAG-0932	LCN21	megahit	87.04	0	1356225	92543	d__Bacteria;p__Firmicutes_A;c__Clostridia;o__Oscillospirales;f__CAG	Bacteria	Firmicutes_A	Clostridia	Oscillospirales	CAG-272	CAG-448	unclassified	unclassified		17	24	12653	176930	medium
megahit_LCN21_bin.2	MAG-0933	LCN21	megahit	94.41	0.22	1962133	63237	d__Bacteria;p__Firmicutes_A;c__Clostridia;o__Oscillospirales;f__CAG	Bacteria	Firmicutes_A	Clostridia	Oscillospirales	CAG-272	Firm-07	unclassified	unclassified	5S ribosomal RNA,5S ribosomal RNA (partial)	20	45	4251	205009	high
megahit_LCN21_bin.22	MAG-0934	LCN21	megahit	80.83	0.67	1517605	121966	d__Bacteria;p__Firmicutes_A;c__Clostridia;o__Oscillospirales;f__CAG	Bacteria	Firmicutes_A	Clostridia	Oscillospirales	CAG-272	unclassified	unclassified	unclassified		20	19	2878	246215	medium
megahit_LCN21_bin.25	MAG-0935	LCN21	megahit	80.61	0.02	1961362	129356	d__Bacteria;p__Firmicutes_A;c__Clostridia;o__Oscillospirales;f__CAG	Bacteria	Firmicutes_A	Clostridia	Oscillospirales	CAG-272	UBA1740	unclassified	unclassified		20	28	10837	196840	medium
megahit_LCN21_bin.28	MAG-0936	LCN21	megahit	84.36	6.71	2727170	34354	d__Bacteria;p__Bacteroidota;c__Bacteroidia;o__Bacteroidales;f__UBA932;g__RC9;	Bacteria	Bacteroidota	Bacteroidia	Bacteroidales	UBA932	RC9	unclassified	unclassified		18	147	2522	112743	medium
megahit_LCN21_bin.29	MAG-0937	LCN21	megahit	97.85	1.12	1942948	203285	d__Bacteria;p__Bacteroidota;c__Bacteroidia;o__Bacteroidales;f__Rikenellaceae;g__Alistipes;	Bacteria	Bacteroidota	Bacteroidia	Bacteroidales	Rikenellaceae	Alistipes	unclassified	unclassified	5S ribosomal RNA,5S ribosomal RNA	20	12	38866	406680	high
megahit_LCN21_bin.42	MAG-0938	LCN21	megahit	90.02	2.19	1483491	23391	d__Bacteria;p__Proteobacteria;c__Gammaproteobacteria;o__Burkholderiales;f__Burkholderiaceae;g__CAG	Bacteria	Proteobacteria	Gammaproteobacteria	Burkholderiales	Burkholderiaceae	CAG-521	unclassified	unclassified	5S ribosomal RNA	19	113	2532	101568	high
megahit_LCN21_bin.51	MAG-0939	LCN21	megahit	94.63	0.22	1543571	63369	d__Bacteria;p__Firmicutes_A;c__Clostridia;o__Oscillospirales;f__Acutalibacteraceae;	Bacteria	Firmicutes_A	Clostridia	Oscillospirales	Acutalibacteraceae	unclassified	unclassified	unclassified	5S ribosomal RNA	16	41	3115	219831	high
megahit_LCN21_bin.58	MAG-0940	LCN21	megahit	92.65	1.12	1254932	37318	d__Bacteria;p__Firmicutes;c__Bacilli;o__RFN20;	Bacteria	Firmicutes	Bacilli	RFN20	unclassified	unclassified	unclassified	unclassified	5S ribosomal RNA (partial)	14	57	2540	73483	high
megahit_LCN21_bin.64	MAG-0941	LCN21	megahit	88.6	8.45	2027992	30325	d__Bacteria;p__Bacteroidota;c__Bacteroidia;o__Bacteroidales;f__UBA932;g__RC9;	Bacteria	Bacteroidota	Bacteroidia	Bacteroidales	UBA932	RC9	unclassified	unclassified	5S ribosomal RNA (partial)	19	117	2544	117745	low
megahit_LCN21_bin.67	MAG-0942	LCN21	megahit	91.13	2.15	2257123	22934	d__Bacteria;p__Bacteroidota;c__Bacteroidia;o__Bacteroidales;f__Paludibacteraceae;	Bacteria	Bacteroidota	Bacteroidia	Bacteroidales	Paludibacteraceae	unclassified	unclassified	unclassified		20	123	2576	54538	high
megahit_LCN21_bin.69	MAG-0943	LCN21	megahit	89.4	1.59	2217530	26559	d__Bacteria;p__Bacteroidota;c__Bacteroidia;o__Bacteroidales;f__UBA932;g__RC9;	Bacteria	Bacteroidota	Bacteroidia	Bacteroidales	UBA932	RC9	unclassified	unclassified	23S ribosomal RNA (partial),5S ribosomal RNA,5S ribosomal RNA (partial),5S ribosomal RNA	20	128	2714	81889	medium
megahit_LCN21_bin.76	MAG-0944	LCN21	megahit	95.08	0.69	2122812	26244	d__Bacteria;p__Firmicutes_A;c__Clostridia;o__Oscillospirales;f__CAG	Bacteria	Firmicutes_A	Clostridia	Oscillospirales	CAG-272	Firm-07	unclassified	unclassified		17	133	2565	83517	high
megahit_LCN21_bin.89	MAG-0945	LCN21	megahit	91.95	1.03	2305647	14785	d__Bacteria;p__Firmicutes_A;c__Clostridia;o__Oscillospirales;f__CAG	Bacteria	Firmicutes_A	Clostridia	Oscillospirales	CAG-272	CAG-448	unclassified	unclassified		19	205	2588	70769	high
megahit_LCN21_bin.90	MAG-0946	LCN21	megahit	93.18	1.34	1706105	108213	d__Bacteria;p__Firmicutes_A;c__Clostridia;o__Oscillospirales;f__CAG	Bacteria	Firmicutes_A	Clostridia	Oscillospirales	CAG-272	CAG-448	unclassified	unclassified	5S ribosomal RNA,5S ribosomal RNA	16	31	2520	218423	high
megahit_LCN21_bin.93	MAG-0947	LCN21	megahit	82.16	7.51	2397658	22023	d__Bacteria;p__Bacteroidota;c__Bacteroidia;o__Bacteroidales;f__UBA932;g__RC9;	Bacteria	Bacteroidota	Bacteroidia	Bacteroidales	UBA932	RC9	unclassified	unclassified	5S ribosomal RNA	19	168	2516	131706	low
megahit_LCN21_bin.97	MAG-0948	LCN21	megahit	93.03	2.84	3182827	16381	d__Bacteria;p__Bacteroidota;c__Bacteroidia;o__Bacteroidales;f__Bacteroidaceae;g__Prevotella;	Bacteria	Bacteroidota	Bacteroidia	Bacteroidales	Bacteroidaceae	Prevotella	unclassified	unclassified	16S ribosomal RNA (partial),5S ribosomal RNA,5S ribosomal RNA,5S ribosomal RNA,5S ribosomal RNA	20	258	2615	76224	high
megahit_LCN22_bin.101	MAG-0949	LCN22	megahit	96.75	4.44	1855257	153630	d__Bacteria;p__Firmicutes_A;c__Clostridia;o__4C28d	Bacteria	Firmicutes_A	Clostridia	4C28d-15	CAG-727	QALS01	unclassified	unclassified	5S ribosomal RNA,5S ribosomal RNA,5S ribosomal RNA	20	18	8286	243440	high
megahit_LCN22_bin.14	MAG-0950	LCN22	megahit	92.64	0.75	2164654	19107	d__Bacteria;p__Bacteroidota;c__Bacteroidia;o__Bacteroidales;f__Muribaculaceae;g__Paramuribaculum;	Bacteria	Bacteroidota	Bacteroidia	Bacteroidales	Muribaculaceae	Paramuribaculum	unclassified	unclassified		18	157	2620	70815	high
megahit_LCN22_bin.24	MAG-0951	LCN22	megahit	95.3	2.16	2687654	82990	d__Bacteria;p__Firmicutes_A;c__Clostridia;o__Oscillospirales;f__CAG	Bacteria	Firmicutes_A	Clostridia	Oscillospirales	CAG-272	QALR01	unclassified	unclassified	5S ribosomal RNA,5S ribosomal RNA (partial)	20	62	2509	226129	high
megahit_LCN22_bin.26	MAG-0952	LCN22	megahit	87.05	1.61	2219886	11077	d__Bacteria;p__Firmicutes_A;c__Clostridia;o__4C28d	Bacteria	Firmicutes_A	Clostridia	4C28d-15	CAG-727	UBA10281	unclassified	unclassified		15	283	2508	36971	medium
megahit_LCN22_bin.32	MAG-0953	LCN22	megahit	90.38	1.3	2364321	29564	d__Bacteria;p__Bacteroidota;c__Bacteroidia;o__Bacteroidales;f__Bacteroidaceae;g__UBA4372;s__UBA4372	Bacteria	Bacteroidota	Bacteroidia	Bacteroidales	Bacteroidaceae	UBA4372	UBA4372 sp002297545	unclassified	5S ribosomal RNA (partial)	20	130	2523	89569	high
megahit_LCN22_bin.33	MAG-0954	LCN22	megahit	98.89	0.38	2885801	135717	d__Bacteria;p__Bacteroidota;c__Bacteroidia;o__Bacteroidales;f__Bacteroidaceae;g__Prevotella;s__Prevotella	Bacteria	Bacteroidota	Bacteroidia	Bacteroidales	Bacteroidaceae	Prevotella	Prevotella sp900119285	unclassified	5S ribosomal RNA,5S ribosomal RNA,5S ribosomal RNA,5S ribosomal RNA	20	27	2503	230649	high
megahit_LCN22_bin.38	MAG-0955	LCN22	megahit	97.11	0.37	2502062	464569	d__Bacteria;p__Bacteroidota;c__Bacteroidia;o__Bacteroidales;f__Bacteroidaceae;g__Prevotellamassilia;	Bacteria	Bacteroidota	Bacteroidia	Bacteroidales	Bacteroidaceae	Prevotellamassilia	unclassified	unclassified	5S ribosomal RNA,5S ribosomal RNA,5S ribosomal RNA	20	9	129483	574440	high
megahit_LCN22_bin.4	MAG-0956	LCN22	megahit	93.02	0.5	2656910	33327	d__Bacteria;p__Bacteroidota;c__Bacteroidia;o__Bacteroidales;f__Muribaculaceae;g__C941;	Bacteria	Bacteroidota	Bacteroidia	Bacteroidales	Muribaculaceae	C941	unclassified	unclassified	5S ribosomal RNA (partial),5S ribosomal RNA (partial)	20	136	2568	83324	high
megahit_LCN22_bin.51	MAG-0957	LCN22	megahit	82.42	1.61	1652414	19019	d__Bacteria;p__Firmicutes_A;c__Clostridia;o__4C28d	Bacteria	Firmicutes_A	Clostridia	4C28d-15	CAG-727	QALS01	unclassified	unclassified	5S ribosomal RNA	12	132	2559	59975	medium
megahit_LCN22_bin.59	MAG-0958	LCN22	megahit	90.67	0.22	2227925	38917	d__Bacteria;p__Firmicutes_A;c__Clostridia;o__Oscillospirales;f__CAG	Bacteria	Firmicutes_A	Clostridia	Oscillospirales	CAG-272	Firm-07	unclassified	unclassified	5S ribosomal RNA (partial)	20	104	2536	161953	high
megahit_LCN22_bin.67	MAG-0959	LCN22	megahit	82.76	3.45	3147522	17856	d__Bacteria;p__Bacteroidota;c__Bacteroidia;o__Bacteroidales;f__Bacteroidaceae;g__Bacteroides_B;	Bacteria	Bacteroidota	Bacteroidia	Bacteroidales	Bacteroidaceae	Bacteroides_B	unclassified	unclassified	5S ribosomal RNA (partial),5S ribosomal RNA,5S ribosomal RNA,16S ribosomal RNA (partial)	20	247	2508	99023	medium
megahit_LCN22_bin.77	MAG-0960	LCN22	megahit	94.56	0.32	1497186	23385	d__Bacteria;p__Firmicutes_A;c__Clostridia;o__4C28d	Bacteria	Firmicutes_A	Clostridia	4C28d-15	CAG-727	QALS01	unclassified	unclassified	16S ribosomal RNA (partial)	19	83	2501	138030	high
megahit_LCN22_bin.82	MAG-0961	LCN22	megahit	94.35	0.37	2161961	56848	d__Bacteria;p__Firmicutes_A;c__Clostridia;o__4C28d	Bacteria	Firmicutes_A	Clostridia	4C28d-15	CAG-727	QALS01	unclassified	unclassified	16S ribosomal RNA (partial),5S ribosomal RNA,5S ribosomal RNA	20	59	2659	160018	high
megahit_LCN22_bin.85	MAG-0962	LCN22	megahit	97.99	0	1975939	45000	d__Bacteria;p__Firmicutes_A;c__Clostridia;o__Oscillospirales;f__Acutalibacteraceae;g__CAG	Bacteria	Firmicutes_A	Clostridia	Oscillospirales	Acutalibacteraceae	CAG-180	unclassified	unclassified	5S ribosomal RNA,5S ribosomal RNA	20	78	2553	105361	high
megahit_LCN24_bin.1	MAG-0963	LCN24	megahit	98.1	0.22	2253237	111080	d__Bacteria;p__Firmicutes_A;c__Clostridia;o__Oscillospirales;f__Oscillospiraceae;g__CAG	Bacteria	Firmicutes_A	Clostridia	Oscillospirales	Oscillospiraceae	CAG-110	unclassified	unclassified	5S ribosomal RNA,5S ribosomal RNA	20	40	3191	341542	high
megahit_LCN24_bin.100	MAG-0964	LCN24	megahit	93.69	0.34	2604676	196738	d__Bacteria;p__Firmicutes_A;c__Clostridia;o__Oscillospirales;f__Acutalibacteraceae;g__CAG	Bacteria	Firmicutes_A	Clostridia	Oscillospirales	Acutalibacteraceae	CAG-177	unclassified	unclassified	5S ribosomal RNA	20	29	3921	395466	high
megahit_LCN24_bin.105	MAG-0965	LCN24	megahit	98.68	0.38	2537829	48305	d__Bacteria;p__Bacteroidota;c__Bacteroidia;o__Bacteroidales;f__Muribaculaceae;	Bacteria	Bacteroidota	Bacteroidia	Bacteroidales	Muribaculaceae	unclassified	unclassified	unclassified	5S ribosomal RNA (partial),5S ribosomal RNA (partial)	20	71	3948	140388	high
megahit_LCN24_bin.106	MAG-0966	LCN24	megahit	89.25	1.17	1523744	91049	d__Bacteria;p__Firmicutes_A;c__Clostridia;o__Oscillospirales;f__CAG	Bacteria	Firmicutes_A	Clostridia	Oscillospirales	CAG-272	unclassified	unclassified	unclassified		20	33	2857	206612	medium
megahit_LCN24_bin.107	MAG-0967	LCN24	megahit	93.03	0	2098796	111559	d__Bacteria;p__Bacteroidota;c__Bacteroidia;o__Bacteroidales;f__Rikenellaceae;g__Alistipes;	Bacteria	Bacteroidota	Bacteroidia	Bacteroidales	Rikenellaceae	Alistipes	unclassified	unclassified		19	25	13238	319047	high
megahit_LCN24_bin.113	MAG-0968	LCN24	megahit	95.34	1.92	1877086	46117	d__Bacteria;p__Bacteroidota;c__Bacteroidia;o__Bacteroidales;f__Rikenellaceae;g__Alistipes;	Bacteria	Bacteroidota	Bacteroidia	Bacteroidales	Rikenellaceae	Alistipes	unclassified	unclassified		18	62	2867	143612	high
megahit_LCN24_bin.114	MAG-0969	LCN24	megahit	88.54	0.48	1579106	205929	d__Bacteria;p__Bacteroidota;c__Bacteroidia;o__Bacteroidales;f__Rikenellaceae;	Bacteria	Bacteroidota	Bacteroidia	Bacteroidales	Rikenellaceae	unclassified	unclassified	unclassified	5S ribosomal RNA	18	15	4878	502751	medium
megahit_LCN24_bin.12	MAG-0970	LCN24	megahit	93.68	1.61	2221944	60465	d__Bacteria;p__Firmicutes_A;c__Clostridia;o__4C28d	Bacteria	Firmicutes_A	Clostridia	4C28d-15	CAG-727	UBA10281	unclassified	unclassified	5S ribosomal RNA	20	53	2552	155907	high
megahit_LCN24_bin.16	MAG-0971	LCN24	megahit	92.78	2.99	1548337	15319	d__Bacteria;p__Firmicutes_C;c__Negativicutes;o__Acidaminococcales;f__Acidaminococcaceae;g__Phascolarctobacterium_A;	Bacteria	Firmicutes_C	Negativicutes	Acidaminococcales	Acidaminococcaceae	Phascolarctobacterium_A	unclassified	unclassified	5S ribosomal RNA,5S ribosomal RNA	20	133	2501	54218	high
megahit_LCN24_bin.17	MAG-0972	LCN24	megahit	96.42	5.35	2638329	108024	d__Bacteria;p__Bacteroidota;c__Bacteroidia;o__Bacteroidales;f__Muribaculaceae;	Bacteria	Bacteroidota	Bacteroidia	Bacteroidales	Muribaculaceae	unclassified	unclassified	unclassified	5S ribosomal RNA,5S ribosomal RNA	20	45	2540	314712	medium
megahit_LCN24_bin.25	MAG-0973	LCN24	megahit	93.05	0.07	1353158	38609	d__Bacteria;p__Firmicutes_A;c__Clostridia;o__4C28d	Bacteria	Firmicutes_A	Clostridia	4C28d-15	CAG-727	unclassified	unclassified	unclassified	5S ribosomal RNA,16S ribosomal RNA	20	64	2754	79401	high
megahit_LCN24_bin.3	MAG-0974	LCN24	megahit	96.19	0.95	2002944	21722	d__Bacteria;p__Firmicutes;c__Bacilli;o__Erysipelotrichales;f__Erysipelotrichaceae;	Bacteria	Firmicutes	Bacilli	Erysipelotrichales	Erysipelotrichaceae	unclassified	unclassified	unclassified	5S ribosomal RNA,5S ribosomal RNA,5S ribosomal RNA	20	136	2613	75471	high
megahit_LCN24_bin.40	MAG-0975	LCN24	megahit	89.73	1.34	2265442	80838	d__Bacteria;p__Firmicutes_A;c__Clostridia;o__Lachnospirales;f__Lachnospiraceae;g__SZUA	Bacteria	Firmicutes_A	Clostridia	Lachnospirales	Lachnospiraceae	SZUA-378	unclassified	unclassified		18	51	2613	174758	medium
megahit_LCN24_bin.41	MAG-0976	LCN24	megahit	96.36	3.36	2559729	43706	d__Bacteria;p__Firmicutes_A;c__Clostridia;o__Oscillospirales;f__CAG	Bacteria	Firmicutes_A	Clostridia	Oscillospirales	CAG-272	CAG-448	unclassified	unclassified	5S ribosomal RNA (partial),5S ribosomal RNA (partial)	20	111	2573	142453	high
megahit_LCN24_bin.49	MAG-0977	LCN24	megahit	80.38	0.26	1470603	147525	d__Bacteria;p__Firmicutes_B;c__Dehalobacteriia;o__UBA4068;f__UBA5755;	Bacteria	Firmicutes_B	Dehalobacteriia	UBA4068	UBA5755	unclassified	unclassified	unclassified	5S ribosomal RNA (partial)	20	17	12501	280720	medium
megahit_LCN24_bin.5	MAG-0978	LCN24	megahit	93.01	0.54	1925229	257959	d__Bacteria;p__Bacteroidota;c__Bacteroidia;o__Bacteroidales;f__Paludibacteraceae;	Bacteria	Bacteroidota	Bacteroidia	Bacteroidales	Paludibacteraceae	unclassified	unclassified	unclassified	5S ribosomal RNA,5S ribosomal RNA	20	10	27337	495614	high
megahit_LCN24_bin.54	MAG-0979	LCN24	megahit	91.07	1.34	1265159	15801	d__Bacteria;p__Firmicutes_A;c__Clostridia;o__Monoglobales;	Bacteria	Firmicutes_A	Clostridia	Monoglobales	unclassified	unclassified	unclassified	unclassified		17	110	2671	50813	high
megahit_LCN24_bin.56	MAG-0980	LCN24	megahit	87.96	1.34	2182586	25318	d__Bacteria;p__Firmicutes_A;c__Clostridia;o__Oscillospirales;f__CAG	Bacteria	Firmicutes_A	Clostridia	Oscillospirales	CAG-272	QALR01	unclassified	unclassified		17	127	2514	68495	medium
megahit_LCN24_bin.57	MAG-0981	LCN24	megahit	95.3	0.84	1967684	29337	d__Bacteria;p__Firmicutes_A;c__Clostridia;o__Lachnospirales;f__Anaerotignaceae;g__Anaerotignum;	Bacteria	Firmicutes_A	Clostridia	Lachnospirales	Anaerotignaceae	Anaerotignum	unclassified	unclassified	16S ribosomal RNA (partial),5S ribosomal RNA	20	92	2848	89533	high
megahit_LCN24_bin.68	MAG-0982	LCN24	megahit	84.51	8.33	2363203	10697	d__Bacteria;p__Firmicutes_A;c__Clostridia;o__Lachnospirales;f__Lachnospiraceae;g__CAG	Bacteria	Firmicutes_A	Clostridia	Lachnospirales	Lachnospiraceae	CAG-81	unclassified	unclassified		17	287	2516	41945	low
megahit_LCN24_bin.71	MAG-0983	LCN24	megahit	87.08	1.69	1178596	57477	d__Bacteria;p__Firmicutes_A;c__Clostridia;o__4C28d	Bacteria	Firmicutes_A	Clostridia	4C28d-15	UBA1242	UBA7862	unclassified	unclassified	16S ribosomal RNA (partial),23S ribosomal RNA,5S ribosomal RNA	20	35	4294	117479	medium
megahit_LCN24_bin.72	MAG-0984	LCN24	megahit	86.75	0.97	2672618	68372	d__Bacteria;p__Firmicutes_A;c__Clostridia;o__Lachnospirales;f__Lachnospiraceae;g__Agathobacter;	Bacteria	Firmicutes_A	Clostridia	Lachnospirales	Lachnospiraceae	Agathobacter	unclassified	unclassified		18	66	2528	352413	medium
megahit_LCN24_bin.73	MAG-0985	LCN24	megahit	97.6	0.48	2066798	60512	d__Bacteria;p__Bacteroidota;c__Bacteroidia;o__Bacteroidales;f__Rikenellaceae;g__Alistipes;	Bacteria	Bacteroidota	Bacteroidia	Bacteroidales	Rikenellaceae	Alistipes	unclassified	unclassified		19	51	2610	171838	high
megahit_LCN24_bin.78	MAG-0986	LCN24	megahit	94.69	0	1709306	51073	d__Bacteria;p__Elusimicrobiota;c__Elusimicrobia;o__Elusimicrobiales;f__Elusimicrobiaceae;g__UBA1436;s__UBA1436	Bacteria	Elusimicrobiota	Elusimicrobia	Elusimicrobiales	Elusimicrobiaceae	UBA1436	UBA1436 sp002329395	unclassified	16S ribosomal RNA,23S ribosomal RNA,5S ribosomal RNA (partial)	20	53	2643	129844	high
megahit_LCN24_bin.84	MAG-0987	LCN24	megahit	90.32	0	1653660	192793	d__Bacteria;p__Firmicutes_A;c__Clostridia;o__4C28d	Bacteria	Firmicutes_A	Clostridia	4C28d-15	CAG-727	QALS01	unclassified	unclassified	5S ribosomal RNA,5S ribosomal RNA (partial),5S ribosomal RNA (partial)	20	14	25135	356908	high
megahit_LCN24_bin.86	MAG-0988	LCN24	megahit	89.18	2.89	1573362	13331	d__Bacteria;p__Firmicutes_A;c__Clostridia;o__Oscillospirales;f__Oscillospiraceae;g__CAG	Bacteria	Firmicutes_A	Clostridia	Oscillospirales	Oscillospiraceae	CAG-83	unclassified	unclassified	5S ribosomal RNA	19	156	2515	36379	medium
megahit_LCN24_bin.91	MAG-0989	LCN24	megahit	87.25	3.02	2591697	36383	d__Bacteria;p__Firmicutes_A;c__Clostridia;o__Lachnospirales;f__Lachnospiraceae;	Bacteria	Firmicutes_A	Clostridia	Lachnospirales	Lachnospiraceae	unclassified	unclassified	unclassified		17	101	2688	156053	medium
megahit_LCN24_bin.92	MAG-0990	LCN24	megahit	82.26	1.83	1709598	124223	d__Bacteria;p__Firmicutes_A;c__Clostridia;o__4C28d	Bacteria	Firmicutes_A	Clostridia	4C28d-15	CAG-727	QALS01	unclassified	unclassified	5S ribosomal RNA	12	26	3218	195365	medium
megahit_LCN24_bin.94	MAG-0991	LCN24	megahit	95.08	0	2648474	63774	d__Bacteria;p__Firmicutes_A;c__Clostridia;o__Oscillospirales;f__Acutalibacteraceae;g__UBA8612;	Bacteria	Firmicutes_A	Clostridia	Oscillospirales	Acutalibacteraceae	UBA8612	unclassified	unclassified	16S ribosomal RNA (partial),5S ribosomal RNA (partial),5S ribosomal RNA,23S ribosomal RNA,5S ribosomal RNA	20	65	3278	150836	high
megahit_LCN24_bin.96	MAG-0992	LCN24	megahit	93.55	0	1615457	164687	d__Bacteria;p__Proteobacteria;c__Alphaproteobacteria;o__RF32;f__CAG	Bacteria	Proteobacteria	Alphaproteobacteria	RF32	CAG-239	CAG-495	unclassified	unclassified		20	16	12152	348746	high
megahit_LCN25_bin.13	MAG-0993	LCN25	megahit	86.09	6.88	2129826	29047	d__Bacteria;p__Firmicutes_A;c__Clostridia;o__Oscillospirales;f__Oscillospiraceae;g__CAG	Bacteria	Firmicutes_A	Clostridia	Oscillospirales	Oscillospiraceae	CAG-110	unclassified	unclassified	5S ribosomal RNA,5S ribosomal RNA,5S ribosomal RNA,5S ribosomal RNA	17	117	2521	120091	medium
megahit_LCN25_bin.15	MAG-0994	LCN25	megahit	88.12	3.15	1910225	18792	d__Bacteria;p__Firmicutes_A;c__Clostridia;o__Oscillospirales;f__CAG	Bacteria	Firmicutes_A	Clostridia	Oscillospirales	CAG-272	QALR01	unclassified	unclassified	5S ribosomal RNA	19	138	2563	78925	medium
megahit_LCN25_bin.21	MAG-0995	LCN25	megahit	92.7	1.81	1912568	10915	d__Bacteria;p__Firmicutes_A;c__Clostridia;o__Oscillospirales;f__CAG	Bacteria	Firmicutes_A	Clostridia	Oscillospirales	CAG-272	unclassified	unclassified	unclassified	5S ribosomal RNA	17	217	2541	33792	high
megahit_LCN25_bin.23	MAG-0996	LCN25	megahit	96.24	0.54	2337333	27442	d__Bacteria;p__Bacteroidota;c__Bacteroidia;o__Bacteroidales;f__P3;g__UBA1219;	Bacteria	Bacteroidota	Bacteroidia	Bacteroidales	P3	UBA1219	unclassified	unclassified		20	122	2667	83069	high
megahit_LCN25_bin.24	MAG-0997	LCN25	megahit	89.19	3.85	1706839	11187	d__Bacteria;p__Firmicutes_A;c__Clostridia;o__4C28d	Bacteria	Firmicutes_A	Clostridia	4C28d-15	CAG-727	QALS01	unclassified	unclassified	5S ribosomal RNA	20	189	2523	54921	medium
megahit_LCN25_bin.42	MAG-0998	LCN25	megahit	86.54	0.72	1388804	9255	d__Bacteria;p__Bacteroidota;c__Bacteroidia;o__Bacteroidales;f__Rikenellaceae;	Bacteria	Bacteroidota	Bacteroidia	Bacteroidales	Rikenellaceae	unclassified	unclassified	unclassified		17	187	2514	37873	medium
megahit_LCN25_bin.44	MAG-0999	LCN25	megahit	95.52	3.77	1883161	23670	d__Bacteria;p__Bacteroidota;c__Bacteroidia;o__Bacteroidales;f__Rikenellaceae;g__Alistipes;	Bacteria	Bacteroidota	Bacteroidia	Bacteroidales	Rikenellaceae	Alistipes	unclassified	unclassified		20	109	2550	74176	high
megahit_LCN25_bin.49	MAG-1000	LCN25	megahit	89.99	3.21	1517952	10625	d__Bacteria;p__Firmicutes_A;c__Clostridia;o__Oscillospirales;f__CAG	Bacteria	Firmicutes_A	Clostridia	Oscillospirales	CAG-272	CAG-448	unclassified	unclassified		17	170	2517	44085	medium
megahit_LCN25_bin.53	MAG-1001	LCN25	megahit	92.55	1.24	2911868	28350	d__Bacteria;p__Bacteroidota;c__Bacteroidia;o__Bacteroidales;f__Bacteroidaceae;g__UBA4372;	Bacteria	Bacteroidota	Bacteroidia	Bacteroidales	Bacteroidaceae	UBA4372	unclassified	unclassified	5S ribosomal RNA,5S ribosomal RNA,5S ribosomal RNA,5S ribosomal RNA (partial)	20	146	2654	81648	high
megahit_LCN25_bin.56	MAG-1002	LCN25	megahit	90.86	6.36	2061192	70962	d__Bacteria;p__Bacteroidota;c__Bacteroidia;o__Bacteroidales;f__Paludibacteraceae;g__RF16;	Bacteria	Bacteroidota	Bacteroidia	Bacteroidales	Paludibacteraceae	RF16	unclassified	unclassified		17	72	2550	157890	medium
megahit_LCN25_bin.57	MAG-1003	LCN25	megahit	88.12	1.14	1958382	34451	d__Bacteria;p__Firmicutes_A;c__Clostridia;o__Oscillospirales;f__CAG	Bacteria	Firmicutes_A	Clostridia	Oscillospirales	CAG-272	unclassified	unclassified	unclassified		20	82	2566	142925	medium
megahit_LCN25_bin.64	MAG-1004	LCN25	megahit	82.01	1.38	2222116	21336	d__Bacteria;p__Verrucomicrobiota;c__Kiritimatiellae;o__RFP12;f__UBA1067;g__UBA1067;	Bacteria	Verrucomicrobiota	Kiritimatiellae	RFP12	UBA1067	UBA1067	unclassified	unclassified	5S ribosomal RNA,5S ribosomal RNA	19	150	2667	54354	medium
megahit_LCN25_bin.66	MAG-1005	LCN25	megahit	86.28	7.34	1378936	8224	d__Bacteria;p__Firmicutes_A;c__Clostridia;o__Lachnospirales;f__Lachnospiraceae;	Bacteria	Firmicutes_A	Clostridia	Lachnospirales	Lachnospiraceae	unclassified	unclassified	unclassified		12	202	2519	23748	low
megahit_LCN25_bin.68	MAG-1006	LCN25	megahit	92.87	3.61	1923005	92498	d__Bacteria;p__Bacteroidota;c__Bacteroidia;o__Bacteroidales;f__Rikenellaceae;g__Alistipes;	Bacteria	Bacteroidota	Bacteroidia	Bacteroidales	Rikenellaceae	Alistipes	unclassified	unclassified	5S ribosomal RNA (partial)	20	33	4687	168114	high
megahit_LCN25_bin.69	MAG-1007	LCN25	megahit	96.79	0.53	2596723	118509	d__Bacteria;p__Bacteroidota;c__Bacteroidia;o__Bacteroidales;f__Muribaculaceae;g__M3;	Bacteria	Bacteroidota	Bacteroidia	Bacteroidales	Muribaculaceae	M3	unclassified	unclassified	5S ribosomal RNA (partial),5S ribosomal RNA	20	40	3824	269930	high
megahit_LCN25_bin.71	MAG-1008	LCN25	megahit	94.77	1.9	2048504	27618	d__Bacteria;p__Firmicutes_A;c__Clostridia;o__Lachnospirales;f__Lachnospiraceae;g__Butyrivibrio_A;	Bacteria	Firmicutes_A	Clostridia	Lachnospirales	Lachnospiraceae	Butyrivibrio_A	unclassified	unclassified	16S ribosomal RNA (partial)	20	107	2640	78045	high
megahit_LCN25_bin.76	MAG-1009	LCN25	megahit	92.2	0.02	2282554	45475	d__Bacteria;p__Bacteroidota;c__Bacteroidia;o__Bacteroidales;f__F082;g__F082;	Bacteria	Bacteroidota	Bacteroidia	Bacteroidales	F082	F082	unclassified	unclassified	5S ribosomal RNA (partial),5S ribosomal RNA (partial),5S ribosomal RNA (partial)	19	74	2560	225786	high
megahit_LCN25_bin.80	MAG-1010	LCN25	megahit	96.62	3.93	2071109	44803	d__Bacteria;p__Bacteroidota;c__Bacteroidia;o__Bacteroidales;f__Rikenellaceae;g__Alistipes;	Bacteria	Bacteroidota	Bacteroidia	Bacteroidales	Rikenellaceae	Alistipes	unclassified	unclassified	5S ribosomal RNA,5S ribosomal RNA	19	63	3903	170143	high
megahit_LCN25_bin.98	MAG-1011	LCN25	megahit	95.09	2.49	1507630	20696	d__Bacteria;p__Firmicutes_C;c__Negativicutes;o__Acidaminococcales;f__Acidaminococcaceae;g__Phascolarctobacterium_A;	Bacteria	Firmicutes_C	Negativicutes	Acidaminococcales	Acidaminococcaceae	Phascolarctobacterium_A	unclassified	unclassified	5S ribosomal RNA,5S ribosomal RNA	20	98	2645	71847	high
megahit_LCN25_bin.99	MAG-1012	LCN25	megahit	91.93	9.51	2391933	28603	d__Bacteria;p__Firmicutes_A;c__Clostridia;o__Oscillospirales;f__Oscillospiraceae;g__CAG	Bacteria	Firmicutes_A	Clostridia	Oscillospirales	Oscillospiraceae	CAG-110	unclassified	unclassified	5S ribosomal RNA,5S ribosomal RNA	19	114	2547	138588	low
megahit_LCN5_bin.1	MAG-1013	LCN5	megahit	90.77	8.13	2377144	37726	d__Bacteria;p__Bacteroidota;c__Bacteroidia;o__Bacteroidales;f__Paludibacteraceae;g__RF16;	Bacteria	Bacteroidota	Bacteroidia	Bacteroidales	Paludibacteraceae	RF16	unclassified	unclassified	5S ribosomal RNA	18	91	2728	182477	medium
megahit_LCN5_bin.13	MAG-1014	LCN5	megahit	80.29	6.74	1246881	5396	d__Bacteria;p__Elusimicrobiota;c__Elusimicrobia;o__Elusimicrobiales;f__Elusimicrobiaceae;	Bacteria	Elusimicrobiota	Elusimicrobia	Elusimicrobiales	Elusimicrobiaceae	unclassified	unclassified	unclassified		19	242	2526	22306	low
megahit_LCN5_bin.31	MAG-1015	LCN5	megahit	97.74	0.67	1496046	39930	d__Bacteria;p__Firmicutes_A;c__Clostridia;o__Oscillospirales;f__CAG	Bacteria	Firmicutes_A	Clostridia	Oscillospirales	CAG-272	unclassified	unclassified	unclassified	16S ribosomal RNA (partial)	20	59	2911	118652	high
megahit_LCN5_bin.40	MAG-1016	LCN5	megahit	93.01	0.7	2423719	128790	d__Bacteria;p__Spirochaetota;c__Spirochaetia;o__Treponematales;f__Treponemataceae;g__Treponema_D;	Bacteria	Spirochaetota	Spirochaetia	Treponematales	Treponemataceae	Treponema_D	unclassified	unclassified	5S ribosomal RNA,5S ribosomal RNA	20	37	2602	305030	high
megahit_LCN5_bin.45	MAG-1017	LCN5	megahit	88.3	5.71	2064889	23211	d__Bacteria;p__Firmicutes_A;c__Clostridia;o__Oscillospirales;f__Oscillospiraceae;g__CAG	Bacteria	Firmicutes_A	Clostridia	Oscillospirales	Oscillospiraceae	CAG-110	unclassified	unclassified	5S ribosomal RNA,5S ribosomal RNA,5S ribosomal RNA	20	152	2548	47605	medium
megahit_LCN5_bin.49	MAG-1018	LCN5	megahit	83.44	0.64	1690191	12632	d__Bacteria;p__Bacteroidota;c__Bacteroidia;o__Bacteroidales;f__P3;g__UBA3388;s__UBA3388	Bacteria	Bacteroidota	Bacteroidia	Bacteroidales	P3	UBA3388	UBA3388 sp002358835	unclassified		16	174	2526	46387	medium
megahit_LCN5_bin.52	MAG-1019	LCN5	megahit	99.19	0.54	1857702	97853	d__Bacteria;p__Bacteroidota;c__Bacteroidia;o__Bacteroidales;f__Paludibacteraceae;g__RUG163;	Bacteria	Bacteroidota	Bacteroidia	Bacteroidales	Paludibacteraceae	RUG163	unclassified	unclassified	5S ribosomal RNA	20	29	2545	254107	high
megahit_LCN5_bin.6	MAG-1020	LCN5	megahit	85.35	5.24	2679318	40754	d__Bacteria;p__Bacteroidota;c__Bacteroidia;o__Bacteroidales;f__UBA932;g__RC9;	Bacteria	Bacteroidota	Bacteroidia	Bacteroidales	UBA932	RC9	unclassified	unclassified	5S ribosomal RNA	20	137	2500	96827	medium
megahit_LCN6_bin.14	MAG-1021	LCN6	megahit	92.04	1.03	1411791	20484	d__Bacteria;p__Firmicutes_A;c__Clostridia;o__Oscillospirales;f__Acutalibacteraceae;g__UBA737;	Bacteria	Firmicutes_A	Clostridia	Oscillospirales	Acutalibacteraceae	UBA737	unclassified	unclassified		17	109	2517	81313	high
megahit_LCN6_bin.26	MAG-1022	LCN6	megahit	89.15	5.02	2528762	29553	d__Bacteria;p__Bacteroidota;c__Bacteroidia;o__Bacteroidales;f__UBA932;g__RC9;	Bacteria	Bacteroidota	Bacteroidia	Bacteroidales	UBA932	RC9	unclassified	unclassified	5S ribosomal RNA,5S ribosomal RNA	20	169	2514	140841	medium
megahit_LCN6_bin.27	MAG-1023	LCN6	megahit	94.83	0.73	2060183	51855	d__Bacteria;p__Firmicutes_A;c__Clostridia;o__Oscillospirales;f__CAG	Bacteria	Firmicutes_A	Clostridia	Oscillospirales	CAG-272	Firm-07	unclassified	unclassified	5S ribosomal RNA (partial)	20	69	3115	123308	high
megahit_LCN6_bin.33	MAG-1024	LCN6	megahit	87.53	0.67	1315857	18074	d__Bacteria;p__Firmicutes_A;c__Clostridia;	Bacteria	Firmicutes_A	Clostridia		unclassified	unclassified	unclassified	unclassified	5S ribosomal RNA (partial)	16	112	2633	74101	medium
megahit_LCN6_bin.34	MAG-1025	LCN6	megahit	93.92	0.03	1710028	67825	d__Bacteria;p__Firmicutes_A;c__Clostridia;o__4C28d	Bacteria	Firmicutes_A	Clostridia	4C28d-15	CAG-727	QALS01	unclassified	unclassified	5S ribosomal RNA,5S ribosomal RNA	20	41	2613	179862	high
megahit_LCN6_bin.4	MAG-1026	LCN6	megahit	83.02	1.23	1874069	10491	d__Bacteria;p__Firmicutes_A;c__Clostridia;o__Oscillospirales;f__CAG	Bacteria	Firmicutes_A	Clostridia	Oscillospirales	CAG-272	QALR01	unclassified	unclassified	5S ribosomal RNA	14	234	2504	74253	medium
megahit_LCN6_bin.44	MAG-1027	LCN6	megahit	89.36	1.67	2056085	21503	d__Bacteria;p__Bacteroidota;c__Bacteroidia;o__Bacteroidales;f__UBA932;g__RC9;	Bacteria	Bacteroidota	Bacteroidia	Bacteroidales	UBA932	RC9	unclassified	unclassified		16	157	2565	73801	medium
megahit_LCN7_bin.10	MAG-1028	LCN7	megahit	85.46	2.03	1713782	12269	d__Bacteria;p__Firmicutes_A;c__Clostridia;o__Oscillospirales;f__CAG	Bacteria	Firmicutes_A	Clostridia	Oscillospirales	CAG-272	UBA1740	unclassified	unclassified		16	185	2538	47822	medium
megahit_LCN7_bin.13	MAG-1029	LCN7	megahit	91.12	0.36	2495935	23107	d__Bacteria;p__Firmicutes_A;c__Clostridia;o__Oscillospirales;f__CAG	Bacteria	Firmicutes_A	Clostridia	Oscillospirales	CAG-272	CAG-448	unclassified	unclassified		18	156	2670	79242	high
megahit_LCN7_bin.18	MAG-1030	LCN7	megahit	81.35	1.28	775332	6314	d__Bacteria;p__Firmicutes_A;c__Clostridia;o__4C28d	Bacteria	Firmicutes_A	Clostridia	4C28d-15	UBA1242	UBA6345	unclassified	unclassified	16S ribosomal RNA	9	132	2527	19573	medium
megahit_LCN7_bin.20	MAG-1031	LCN7	megahit	90.21	0.24	1902513	20743	d__Bacteria;p__Bacteroidota;c__Bacteroidia;o__Bacteroidales;f__Rikenellaceae;g__Alistipes;	Bacteria	Bacteroidota	Bacteroidia	Bacteroidales	Rikenellaceae	Alistipes	unclassified	unclassified	5S ribosomal RNA,5S ribosomal RNA (partial)	20	122	2570	83107	high
megahit_LCN7_bin.35	MAG-1032	LCN7	megahit	90.45	0	1007428	22226	d__Bacteria;p__Firmicutes_A;c__Clostridia;o__4C28d	Bacteria	Firmicutes_A	Clostridia	4C28d-15	UBA1242	UBA5489	unclassified	unclassified	16S ribosomal RNA (partial),16S ribosomal RNA (partial),23S ribosomal RNA,5S ribosomal RNA	20	70	2863	57004	high
megahit_LCN7_bin.38	MAG-1033	LCN7	megahit	97.11	2.4	1719815	42287	d__Bacteria;p__Firmicutes_C;c__Negativicutes;o__Acidaminococcales;f__Acidaminococcaceae;g__Phascolarctobacterium_A;	Bacteria	Firmicutes_C	Negativicutes	Acidaminococcales	Acidaminococcaceae	Phascolarctobacterium_A	unclassified	unclassified	5S ribosomal RNA (partial),5S ribosomal RNA,5S ribosomal RNA (partial),5S ribosomal RNA,5S ribosomal RNA	20	66	2712	115204	high
megahit_LCN7_bin.42	MAG-1034	LCN7	megahit	82.88	2.36	3130569	9518	d__Bacteria;p__Verrucomicrobiota;c__Lentisphaeria;o__Victivallales;f__Victivallaceae;	Bacteria	Verrucomicrobiota	Lentisphaeria	Victivallales	Victivallaceae	unclassified	unclassified	unclassified		19	415	2500	32571	medium
megahit_LCN7_bin.52	MAG-1035	LCN7	megahit	82.68	4.74	1192766	8868	d__Archaea;p__Halobacterota;c__Methanomicrobia;o__Methanomicrobiales;f__Methanocorpusculaceae;g__Methanocorpusculum;	Archaea	Halobacterota	Methanomicrobia	Methanomicrobiales	Methanocorpusculaceae	Methanocorpusculum	unclassified	unclassified	5S ribosomal RNA	18	164	2514	60682	medium
megahit_LCN8_bin.20	MAG-1036	LCN8	megahit	81.63	5.1	2205573	8764	d__Bacteria;p__Firmicutes_A;c__Clostridia;o__Oscillospirales;f__Acutalibacteraceae;g__UBA1081;	Bacteria	Firmicutes_A	Clostridia	Oscillospirales	Acutalibacteraceae	UBA1081	unclassified	unclassified	5S ribosomal RNA,5S ribosomal RNA,5S ribosomal RNA	17	294	2501	31701	medium
megahit_LCN8_bin.38	MAG-1037	LCN8	megahit	91.64	1.55	2524024	32585	d__Bacteria;p__Bacteroidota;c__Bacteroidia;o__Bacteroidales;f__Bacteroidaceae;	Bacteria	Bacteroidota	Bacteroidia	Bacteroidales	Bacteroidaceae	unclassified	unclassified	unclassified	5S ribosomal RNA,5S ribosomal RNA (partial),5S ribosomal RNA (partial)	17	126	2566	150568	high
megahit_LCN8_bin.40	MAG-1038	LCN8	megahit	92.84	2.32	1964716	13126	d__Bacteria;p__Firmicutes_A;c__Clostridia;o__Oscillospirales;f__CAG	Bacteria	Firmicutes_A	Clostridia	Oscillospirales	CAG-272	Firm-07	unclassified	unclassified	5S ribosomal RNA,5S ribosomal RNA,16S ribosomal RNA (partial)	19	196	2509	50449	high
megahit_LCN8_bin.50	MAG-1039	LCN8	megahit	94.09	0.27	2055669	15983	d__Bacteria;p__Bacteroidota;c__Bacteroidia;o__Bacteroidales;f__P3;g__UBA3388;s__UBA3388	Bacteria	Bacteroidota	Bacteroidia	Bacteroidales	P3	UBA3388	UBA3388 sp002358855	unclassified		20	176	2522	69003	high
megahit_LCN8_bin.59	MAG-1040	LCN8	megahit	92.49	1.18	1686520	17650	d__Bacteria;p__Firmicutes_A;c__Clostridia;o__Oscillospirales;f__CAG	Bacteria	Firmicutes_A	Clostridia	Oscillospirales	CAG-272	unclassified	unclassified	unclassified		18	139	2587	77184	high
megahit_LCN8_bin.6	MAG-1041	LCN8	megahit	83.24	4.2	1378080	7828	d__Bacteria;p__Firmicutes_C;c__Negativicutes;o__Acidaminococcales;f__Acidaminococcaceae;	Bacteria	Firmicutes_C	Negativicutes	Acidaminococcales	Acidaminococcaceae	unclassified	unclassified	unclassified	5S ribosomal RNA	20	206	2516	29373	medium
megahit_LCN8_bin.62	MAG-1042	LCN8	megahit	95.38	2.18	1427665	32642	d__Bacteria;p__Firmicutes_A;c__Clostridia;o__Oscillospirales;f__Acutalibacteraceae;	Bacteria	Firmicutes_A	Clostridia	Oscillospirales	Acutalibacteraceae	unclassified	unclassified	unclassified	5S ribosomal RNA,16S ribosomal RNA (partial)	20	62	2624	84029	high
megahit_LCN9_bin.100	MAG-1043	LCN9	megahit	90.22	2.64	1836101	13663	d__Bacteria;p__Bacteroidota;c__Bacteroidia;o__Bacteroidales;f__Rikenellaceae;g__Alistipes;	Bacteria	Bacteroidota	Bacteroidia	Bacteroidales	Rikenellaceae	Alistipes	unclassified	unclassified		17	165	2599	47178	high
megahit_LCN9_bin.101	MAG-1044	LCN9	megahit	96.76	3.06	1953722	55152	d__Bacteria;p__Firmicutes_A;c__Clostridia;o__Oscillospirales;f__CAG	Bacteria	Firmicutes_A	Clostridia	Oscillospirales	CAG-272	UBA1740	unclassified	unclassified		16	52	3618	122020	high
megahit_LCN9_bin.107	MAG-1045	LCN9	megahit	85.81	2.82	2464347	16200	d__Bacteria;p__Firmicutes_A;c__Clostridia;o__Oscillospirales;f__Acutalibacteraceae;g__UBA6857;	Bacteria	Firmicutes_A	Clostridia	Oscillospirales	Acutalibacteraceae	UBA6857	unclassified	unclassified	5S ribosomal RNA (partial),5S ribosomal RNA,5S ribosomal RNA (partial)	20	218	2515	72727	medium
megahit_LCN9_bin.15	MAG-1046	LCN9	megahit	86.02	5.93	1370157	8589	d__Bacteria;p__Firmicutes_A;c__Clostridia;o__Oscillospirales;f__Acutalibacteraceae;	Bacteria	Firmicutes_A	Clostridia	Oscillospirales	Acutalibacteraceae	unclassified	unclassified	unclassified	5S ribosomal RNA,5S ribosomal RNA	13	192	2508	37752	medium
megahit_LCN9_bin.20	MAG-1047	LCN9	megahit	97.05	4.19	2444695	47263	d__Bacteria;p__Firmicutes_A;c__Clostridia;o__Oscillospirales;f__Acutalibacteraceae;g__CAG	Bacteria	Firmicutes_A	Clostridia	Oscillospirales	Acutalibacteraceae	CAG-177	unclassified	unclassified	5S ribosomal RNA,5S ribosomal RNA	19	86	2679	120542	high
megahit_LCN9_bin.36	MAG-1048	LCN9	megahit	84.05	0	1682005	8500	d__Bacteria;p__Firmicutes_A;c__Clostridia;o__Oscillospirales;f__CAG	Bacteria	Firmicutes_A	Clostridia	Oscillospirales	CAG-272	unclassified	unclassified	unclassified		14	239	2510	25402	medium
megahit_LCN9_bin.39	MAG-1049	LCN9	megahit	92.74	0.43	1429197	116742	d__Bacteria;p__Firmicutes_A;c__Clostridia;o__4C28d	Bacteria	Firmicutes_A	Clostridia	4C28d-15	CAG-314	unclassified	unclassified	unclassified	5S ribosomal RNA,23S ribosomal RNA	20	24	2627	177569	high
megahit_LCN9_bin.4	MAG-1050	LCN9	megahit	95.73	0.4	1498979	42315	d__Bacteria;p__Firmicutes_A;c__Clostridia;o__Oscillospirales;f__CAG	Bacteria	Firmicutes_A	Clostridia	Oscillospirales	CAG-272	unclassified	unclassified	unclassified		15	57	2746	88625	high
megahit_LCN9_bin.43	MAG-1051	LCN9	megahit	89.31	0.22	1621887	14588	d__Bacteria;p__Firmicutes_A;c__Clostridia;o__Oscillospirales;f__CAG	Bacteria	Firmicutes_A	Clostridia	Oscillospirales	CAG-272	unclassified	unclassified	unclassified		17	156	2622	49176	medium
megahit_LCN9_bin.53	MAG-1052	LCN9	megahit	83.06	0.97	1174609	13060	d__Bacteria;p__Firmicutes_A;c__Clostridia;o__4C28d	Bacteria	Firmicutes_A	Clostridia	4C28d-15	CAG-727	unclassified	unclassified	unclassified	5S ribosomal RNA	17	120	2527	34205	medium
megahit_LCN9_bin.58	MAG-1053	LCN9	megahit	95.21	0	1776500	22317	d__Bacteria;p__Bacteroidota;c__Bacteroidia;o__Bacteroidales;f__Rikenellaceae;g__Alistipes;	Bacteria	Bacteroidota	Bacteroidia	Bacteroidales	Rikenellaceae	Alistipes	unclassified	unclassified	5S ribosomal RNA	17	106	2913	86410	high
megahit_LCN9_bin.66	MAG-1054	LCN9	megahit	94.4	0	2838885	35810	d__Bacteria;p__Spirochaetota;c__GWE2	Bacteria	Spirochaetota	GWE2-31-10	GWE2-31-10	GWE2-31-10	unclassified	unclassified	unclassified	5S ribosomal RNA,5S ribosomal RNA (partial),5S ribosomal RNA (partial)	20	115	2553	129512	high
megahit_LCN9_bin.75	MAG-1055	LCN9	megahit	94.3	0.22	2442909	18728	d__Bacteria;p__Firmicutes_A;c__Clostridia;o__Oscillospirales;f__Acutalibacteraceae;g__Ruminococcus_E;	Bacteria	Firmicutes_A	Clostridia	Oscillospirales	Acutalibacteraceae	Ruminococcus_E	unclassified	unclassified	5S ribosomal RNA (partial),5S ribosomal RNA,5S ribosomal RNA	13	170	2502	62659	high
megahit_LCN9_bin.83	MAG-1056	LCN9	megahit	96.48	2.01	1931737	27408	d__Bacteria;p__Firmicutes_A;c__Clostridia;o__Monoglobales;f__UBA9506;g__UBA9506;	Bacteria	Firmicutes_A	Clostridia	Monoglobales	UBA9506	UBA9506	unclassified	unclassified	5S ribosomal RNA,5S ribosomal RNA,23S ribosomal RNA,16S ribosomal RNA	20	124	2503	127242	high
megahit_LCN9_bin.87	MAG-1057	LCN9	megahit	93.4	0	1748772	113988	d__Bacteria;p__Firmicutes_A;c__Clostridia;o__Oscillospirales;f__Acutalibacteraceae;g__Ruminococcus_E;	Bacteria	Firmicutes_A	Clostridia	Oscillospirales	Acutalibacteraceae	Ruminococcus_E	unclassified	unclassified	5S ribosomal RNA	19	22	10487	385841	high
megahit_LCN9_bin.88	MAG-1058	LCN9	megahit	87.46	0.13	2207300	13061	d__Bacteria;p__Firmicutes_A;c__Clostridia;o__Oscillospirales;f__CAG	Bacteria	Firmicutes_A	Clostridia	Oscillospirales	CAG-272	Firm-07	unclassified	unclassified		19	216	2506	44572	medium
megahit_LCN9_bin.90	MAG-1059	LCN9	megahit	88.71	0.43	1844971	20967	d__Bacteria;p__Firmicutes_A;c__Clostridia;o__4C28d	Bacteria	Firmicutes_A	Clostridia	4C28d-15	CAG-727	UBA4636	unclassified	unclassified	16S ribosomal RNA (partial),5S ribosomal RNA	17	135	2811	66712	medium
megahit_M1_bin.16	MAG-1060	M1	megahit	84.79	1.34	1895472	13130	d__Bacteria;p__Firmicutes_A;c__Clostridia;o__Oscillospirales;f__Butyricicoccaceae;g__Butyricicoccus;s__Butyricicoccus	Bacteria	Firmicutes_A	Clostridia	Oscillospirales	Butyricicoccaceae	Butyricicoccus	Butyricicoccus pullicaecorum	unclassified		17	193	2553	47975	medium
megahit_M1_bin.3	MAG-1061	M1	megahit	98.4	1.52	2005647	22829	d__Bacteria;p__Firmicutes_C;c__Negativicutes;o__Selenomonadales;f__Selenomonadaceae;g__Anaerovibrio;	Bacteria	Firmicutes_C	Negativicutes	Selenomonadales	Selenomonadaceae	Anaerovibrio	unclassified	unclassified	5S ribosomal RNA,5S ribosomal RNA	20	119	2529	54303	high
megahit_M1_bin.5	MAG-1062	M1	megahit	97.47	1.46	2777074	46143	d__Bacteria;p__Firmicutes_A;c__Clostridia;o__Lachnospirales;f__Lachnospiraceae;g__Faecalicatena;s__Faecalicatena	Bacteria	Firmicutes_A	Clostridia	Lachnospirales	Lachnospiraceae	Faecalicatena	Faecalicatena gnavus	unclassified		20	95	2533	123398	high
megahit_M10_bin.1	MAG-1063	M10	megahit	95.1	1.66	1861816	21378	d__Bacteria;p__Firmicutes_A;c__Clostridia;o__Christensenellales;f__CAG	Bacteria	Firmicutes_A	Clostridia	Christensenellales	CAG-138	unclassified	unclassified	unclassified		20	117	2582	69797	high
megahit_M10_bin.14	MAG-1064	M10	megahit	92.03	0.48	5713454	117512	d__Bacteria;p__Bacteroidota;c__Bacteroidia;o__Bacteroidales;f__Tannerellaceae;g__Parabacteroides;s__Parabacteroides	Bacteria	Bacteroidota	Bacteroidia	Bacteroidales	Tannerellaceae	Parabacteroides	Parabacteroides goldsteinii	unclassified	5S ribosomal RNA,5S ribosomal RNA,16S ribosomal RNA (partial)	20	73	2534	381225	high
megahit_M10_bin.15	MAG-1065	M10	megahit	99.51	0	1450800	57074	d__Bacteria;p__Campylobacterota;c__Campylobacteria;o__Campylobacterales;f__Campylobacteraceae;g__Campylobacter;	Bacteria	Campylobacterota	Campylobacteria	Campylobacterales	Campylobacteraceae	Campylobacter	unclassified	unclassified		19	37	2992	164928	high
megahit_M10_bin.17	MAG-1066	M10	megahit	86.97	0.68	2350336	23118	d__Bacteria;p__Verrucomicrobiota;c__Verrucomicrobiae;o__Verrucomicrobiales;f__Akkermansiaceae;g__Akkermansia;	Bacteria	Verrucomicrobiota	Verrucomicrobiae	Verrucomicrobiales	Akkermansiaceae	Akkermansia	unclassified	unclassified	5S ribosomal RNA	20	142	2529	94524	medium
megahit_M10_bin.19	MAG-1067	M10	megahit	94.59	0	1600475	33394	d__Bacteria;p__Elusimicrobiota;c__Elusimicrobia;o__Elusimicrobiales;f__Elusimicrobiaceae;g__UBA1436;s__UBA1436	Bacteria	Elusimicrobiota	Elusimicrobia	Elusimicrobiales	Elusimicrobiaceae	UBA1436	UBA1436 sp002329395	unclassified	16S ribosomal RNA,23S ribosomal RNA,5S ribosomal RNA (partial)	20	66	2976	76204	high
megahit_M10_bin.29	MAG-1068	M10	megahit	86.35	0.94	2626896	64525	d__Bacteria;p__Firmicutes_A;c__Clostridia;o__Oscillospirales;f__Acutalibacteraceae;g__RUG806;	Bacteria	Firmicutes_A	Clostridia	Oscillospirales	Acutalibacteraceae	RUG806	unclassified	unclassified	5S ribosomal RNA,5S ribosomal RNA	19	60	2953	255539	medium
megahit_M10_bin.3	MAG-1069	M10	megahit	91.61	1.54	4351472	80145	d__Bacteria;p__Bacteroidota;c__Bacteroidia;o__Bacteroidales;f__Tannerellaceae;g__Parabacteroides;	Bacteria	Bacteroidota	Bacteroidia	Bacteroidales	Tannerellaceae	Parabacteroides	unclassified	unclassified	5S ribosomal RNA,5S ribosomal RNA,5S ribosomal RNA	19	93	4623	211188	high
megahit_M10_bin.32	MAG-1070	M10	megahit	81.82	0	1915825	20666	d__Bacteria;p__Spirochaetota;c__Spirochaetia;o__Sphaerochaetales;f__Sphaerochaetaceae;	Bacteria	Spirochaetota	Spirochaetia	Sphaerochaetales	Sphaerochaetaceae	unclassified	unclassified	unclassified	5S ribosomal RNA,5S ribosomal RNA	18	128	2534	63243	medium
megahit_M10_bin.35	MAG-1071	M10	megahit	93.74	1.51	1798045	28601	d__Bacteria;p__Firmicutes_A;c__Clostridia;o__Oscillospirales;f__Ruminococcaceae;	Bacteria	Firmicutes_A	Clostridia	Oscillospirales	Ruminococcaceae	unclassified	unclassified	unclassified	5S ribosomal RNA,5S ribosomal RNA,5S ribosomal RNA	20	89	2882	88495	high
megahit_M10_bin.45	MAG-1072	M10	megahit	96.09	1.14	2131836	27379	d__Bacteria;p__Firmicutes_A;c__Clostridia;o__Lachnospirales;f__Anaerotignaceae;g__Anaerotignum;	Bacteria	Firmicutes_A	Clostridia	Lachnospirales	Anaerotignaceae	Anaerotignum	unclassified	unclassified		18	100	3528	64498	high
megahit_M10_bin.49	MAG-1073	M10	megahit	93.01	1.08	1616834	10068	d__Bacteria;p__Proteobacteria;c__Alphaproteobacteria;o__RF32;f__CAG	Bacteria	Proteobacteria	Alphaproteobacteria	RF32	CAG-239	CAG-495	CAG-495 sp000436375	unclassified		17	191	2508	41091	high
megahit_M10_bin.5	MAG-1074	M10	megahit	92.74	0.81	1934913	243567	d__Bacteria;p__Firmicutes_A;c__Clostridia;o__4C28d	Bacteria	Firmicutes_A	Clostridia	4C28d-15	DTU072	unclassified	unclassified	unclassified	16S ribosomal RNA,23S ribosomal RNA,5S ribosomal RNA	20	22	12803	466752	high
megahit_M10_bin.50	MAG-1075	M10	megahit	92.91	0.68	1776725	932449	d__Bacteria;p__Verrucomicrobiota;c__Verrucomicrobiae;o__Opitutales;f__UBA953;	Bacteria	Verrucomicrobiota	Verrucomicrobiae	Opitutales	UBA953	unclassified	unclassified	unclassified		20	12	14506	932449	high
megahit_M10_bin.6	MAG-1076	M10	megahit	95.79	1.26	2847413	28585	d__Bacteria;p__Firmicutes_A;c__Clostridia;o__Lachnospirales;f__Lachnospiraceae;g__SZUA	Bacteria	Firmicutes_A	Clostridia	Lachnospirales	Lachnospiraceae	SZUA-378	unclassified	unclassified		17	166	2525	122552	high
megahit_M10_bin.61	MAG-1077	M10	megahit	93.95	0	1341391	79089	d__Archaea;p__Thermoplasmatota;c__Thermoplasmata;o__Methanomassiliicoccales;f__Methanomethylophilaceae;	Archaea	Thermoplasmatota	Thermoplasmata	Methanomassiliicoccales	Methanomethylophilaceae	unclassified	unclassified	unclassified	5S ribosomal RNA,23S ribosomal RNA,5S ribosomal RNA,16S ribosomal RNA,23S ribosomal RNA	20	30	2505	238616	high
megahit_M10_bin.7	MAG-1078	M10	megahit	94.25	1.96	1328815	20244	d__Archaea;p__Halobacterota;c__Methanomicrobia;o__Methanomicrobiales;f__Methanocorpusculaceae;g__Methanocorpusculum;	Archaea	Halobacterota	Methanomicrobia	Methanomicrobiales	Methanocorpusculaceae	Methanocorpusculum	unclassified	unclassified	5S ribosomal RNA,5S ribosomal RNA	20	93	2565	58759	high
megahit_M10_bin.72	MAG-1079	M10	megahit	83.46	1.2	2191445	13039	d__Bacteria;p__Spirochaetota;c__Spirochaetia;o__Sphaerochaetales;f__Sphaerochaetaceae;g__UBA5920;	Bacteria	Spirochaetota	Spirochaetia	Sphaerochaetales	Sphaerochaetaceae	UBA5920	unclassified	unclassified		19	255	2503	48491	medium
megahit_M11_bin.24	MAG-1080	M11	megahit	83.38	0.68	1812730	6240	d__Bacteria;p__Verrucomicrobiota;c__Verrucomicrobiae;o__Opitutales;f__CAG	Bacteria	Verrucomicrobiota	Verrucomicrobiae	Opitutales	CAG-312	unclassified	unclassified	unclassified		14	326	2514	25095	medium
megahit_M11_bin.3	MAG-1081	M11	megahit	86.83	0	1871163	9756	d__Bacteria;p__Actinobacteriota;c__Coriobacteriia;o__Coriobacteriales;f__Atopobiaceae;g__Olsenella_C;s__Olsenella_C	Bacteria	Actinobacteriota	Coriobacteriia	Coriobacteriales	Atopobiaceae	Olsenella_C	Olsenella_C umbonata	unclassified		19	246	2500	35884	medium
megahit_M11_bin.34	MAG-1082	M11	megahit	97.19	0.05	1810968	36238	d__Bacteria;p__Firmicutes;c__Bacilli;o__RFN20;	Bacteria	Firmicutes	Bacilli	RFN20	unclassified	unclassified	unclassified	unclassified	5S ribosomal RNA,5S ribosomal RNA	20	81	2563	109888	high
megahit_M11_bin.44	MAG-1083	M11	megahit	81.09	0	1041267	11723	d__Bacteria;p__Firmicutes;c__Bacilli;o__RFN20;f__CAG	Bacteria	Firmicutes	Bacilli	RFN20	CAG-826	UBA733	unclassified	unclassified	5S ribosomal RNA (partial)	16	120	2563	86141	medium
megahit_M11_bin.66	MAG-1084	M11	megahit	85.35	1.61	1717068	16448	d__Bacteria;p__Firmicutes_A;c__Clostridia;o__4C28d	Bacteria	Firmicutes_A	Clostridia	4C28d-15	CAG-727	UBA10281	unclassified	unclassified	16S ribosomal RNA	19	148	2553	75754	medium
megahit_M11_bin.7	MAG-1085	M11	megahit	95.64	4.19	2732207	32344	d__Bacteria;p__Firmicutes_A;c__Clostridia;o__Oscillospirales;f__Oscillospiraceae;g__Oscillibacter;	Bacteria	Firmicutes_A	Clostridia	Oscillospirales	Oscillospiraceae	Oscillibacter	unclassified	unclassified	5S ribosomal RNA	16	117	2604	187972	high
megahit_M11_bin.70	MAG-1086	M11	megahit	81.2	0	1567833	9507	d__Bacteria;p__Cyanobacteria;c__Vampirovibrionia;o__Gastranaerophilales;	Bacteria	Cyanobacteria	Vampirovibrionia	Gastranaerophilales	unclassified	unclassified	unclassified	unclassified	5S ribosomal RNA	20	206	2512	27770	medium
megahit_M11_bin.80	MAG-1087	M11	megahit	88.57	4.62	1669047	8838	d__Bacteria;p__Firmicutes;c__Bacilli;o__Erysipelotrichales;f__Erysipelotrichaceae;g__UBA636;	Bacteria	Firmicutes	Bacilli	Erysipelotrichales	Erysipelotrichaceae	UBA636	unclassified	unclassified		17	231	2515	30146	medium
megahit_M12_bin.100	MAG-1088	M12	megahit	83.57	1.89	1135776	9469	d__Bacteria;p__Firmicutes_A;c__Clostridia;o__4C28d	Bacteria	Firmicutes_A	Clostridia	4C28d-15	CAG-314	unclassified	unclassified	unclassified	5S ribosomal RNA	18	144	2521	39896	medium
megahit_M12_bin.107	MAG-1089	M12	megahit	85.12	7.22	2868400	50373	d__Bacteria;p__Bacteroidota;c__Bacteroidia;o__Bacteroidales;f__UBA932;g__RC9;	Bacteria	Bacteroidota	Bacteroidia	Bacteroidales	UBA932	RC9	unclassified	unclassified	5S ribosomal RNA (partial)	19	115	2563	179983	low
megahit_M12_bin.112	MAG-1090	M12	megahit	96.12	2.16	2007791	46767	d__Bacteria;p__Bacteroidota;c__Bacteroidia;o__Bacteroidales;f__Rikenellaceae;g__Alistipes;	Bacteria	Bacteroidota	Bacteroidia	Bacteroidales	Rikenellaceae	Alistipes	unclassified	unclassified	5S ribosomal RNA	20	65	3080	231896	high
megahit_M12_bin.28	MAG-1091	M12	megahit	94.5	2.01	1751714	24615	d__Bacteria;p__Firmicutes_A;c__Clostridia;o__Oscillospirales;f__CAG	Bacteria	Firmicutes_A	Clostridia	Oscillospirales	CAG-272	unclassified	unclassified	unclassified		19	106	2707	61302	high
megahit_M12_bin.36	MAG-1092	M12	megahit	81.49	1.17	1310709	15036	d__Bacteria;p__Firmicutes_A;c__Clostridia;o__Oscillospirales;f__CAG	Bacteria	Firmicutes_A	Clostridia	Oscillospirales	CAG-272	unclassified	unclassified	unclassified		20	119	2627	62356	medium
megahit_M12_bin.55	MAG-1093	M12	megahit	83.74	2.24	1815365	7896	d__Bacteria;p__Firmicutes_A;c__Clostridia;o__Oscillospirales;f__CAG	Bacteria	Firmicutes_A	Clostridia	Oscillospirales	CAG-272	Firm-07	unclassified	unclassified		14	278	2517	27632	medium
megahit_M12_bin.70	MAG-1094	M12	megahit	80.08	0	1776740	18336	d__Bacteria;p__Firmicutes_A;c__Clostridia;o__Lachnospirales;f__Lachnospiraceae;	Bacteria	Firmicutes_A	Clostridia	Lachnospirales	Lachnospiraceae	unclassified	unclassified	unclassified		15	144	2594	58344	medium
megahit_M12_bin.79	MAG-1095	M12	megahit	93.82	3.37	1759240	19115	d__Bacteria;p__Firmicutes;c__Bacilli;o__RF39;f__CAG	Bacteria	Firmicutes	Bacilli	RF39	CAG-1000	CAG-582	unclassified	unclassified	5S ribosomal RNA (partial),5S ribosomal RNA,23S ribosomal RNA,16S ribosomal RNA	20	126	2571	105275	high
megahit_M12_bin.81	MAG-1096	M12	megahit	98.31	4.7	3724744	49119	d__Bacteria;p__Firmicutes_A;c__Clostridia;o__Lachnospirales;f__Lachnospiraceae;g__Roseburia;	Bacteria	Firmicutes_A	Clostridia	Lachnospirales	Lachnospiraceae	Roseburia	unclassified	unclassified	16S ribosomal RNA (partial)	20	141	2513	291908	high
megahit_M12_bin.98	MAG-1097	M12	megahit	97.99	0.67	1994736	87235	d__Bacteria;p__Firmicutes_A;c__Clostridia;o__Oscillospirales;f__Acutalibacteraceae;g__CAG	Bacteria	Firmicutes_A	Clostridia	Oscillospirales	Acutalibacteraceae	CAG-180	unclassified	unclassified	5S ribosomal RNA,5S ribosomal RNA	18	42	2928	161392	high
megahit_M14_bin.21	MAG-1098	M14	megahit	89.79	4.33	1709894	20209	d__Bacteria;p__Firmicutes_A;c__Clostridia;o__Oscillospirales;f__Oscillospiraceae;g__CAG	Bacteria	Firmicutes_A	Clostridia	Oscillospirales	Oscillospiraceae	CAG-110	unclassified	unclassified	5S ribosomal RNA (partial)	14	123	2815	64187	medium
megahit_M14_bin.26	MAG-1099	M14	megahit	89.64	0	1932202	21924	d__Bacteria;p__Firmicutes_A;c__Clostridia;o__4C28d	Bacteria	Firmicutes_A	Clostridia	4C28d-15	CAG-727	QALS01	unclassified	unclassified	5S ribosomal RNA,5S ribosomal RNA	15	144	2534	72287	medium
megahit_M14_bin.3	MAG-1100	M14	megahit	95.22	0	2317630	39961	d__Bacteria;p__Firmicutes_A;c__Clostridia;o__Lachnospirales;f__Lachnospiraceae;g__UBA2821;	Bacteria	Firmicutes_A	Clostridia	Lachnospirales	Lachnospiraceae	UBA2821	unclassified	unclassified	16S ribosomal RNA (partial)	17	97	2687	148225	high
megahit_M14_bin.4	MAG-1101	M14	megahit	97.69	1.91	3503386	38692	d__Bacteria;p__Bacteroidota;c__Bacteroidia;o__Bacteroidales;f__Bacteroidaceae;g__Prevotella;	Bacteria	Bacteroidota	Bacteroidia	Bacteroidales	Bacteroidaceae	Prevotella	unclassified	unclassified		20	151	2697	103140	high
megahit_M14_bin.57	MAG-1102	M14	megahit	98.66	0	2287267	63398	d__Bacteria;p__Firmicutes_A;c__Clostridia;o__Lachnospirales;f__Lachnospiraceae;g__Butyrivibrio_A;	Bacteria	Firmicutes_A	Clostridia	Lachnospirales	Lachnospiraceae	Butyrivibrio_A	unclassified	unclassified		20	53	2582	213103	high
megahit_M14_bin.63	MAG-1103	M14	megahit	96	0	2395408	49858	d__Bacteria;p__Firmicutes_A;c__Clostridia;o__Lachnospirales;f__Lachnospiraceae;g__Agathobacter;	Bacteria	Firmicutes_A	Clostridia	Lachnospirales	Lachnospiraceae	Agathobacter	unclassified	unclassified		18	81	2563	157273	high
megahit_M14_bin.64	MAG-1104	M14	megahit	99.04	0.72	1926460	318725	d__Bacteria;p__Bacteroidota;c__Bacteroidia;o__Bacteroidales;f__Rikenellaceae;g__Alistipes;	Bacteria	Bacteroidota	Bacteroidia	Bacteroidales	Rikenellaceae	Alistipes	unclassified	unclassified	16S ribosomal RNA,5S ribosomal RNA,5S ribosomal RNA,23S ribosomal RNA (partial),5S ribosomal RNA	20	9	10150	476479	high
megahit_M14_bin.69	MAG-1105	M14	megahit	97.9	0.7	2414165	99467	d__Bacteria;p__Spirochaetota;c__Spirochaetia;o__Treponematales;f__Treponemataceae;g__Treponema_D;s__Treponema_D	Bacteria	Spirochaetota	Spirochaetia	Treponematales	Treponemataceae	Treponema_D	Treponema_D porcinum	unclassified	5S ribosomal RNA,5S ribosomal RNA,5S ribosomal RNA	20	35	7219	216535	high
megahit_M15_bin.15	MAG-1106	M15	megahit	91.2	0.02	1421642	22706	d__Bacteria;p__Firmicutes_A;c__Clostridia;o__Oscillospirales;f__CAG	Bacteria	Firmicutes_A	Clostridia	Oscillospirales	CAG-272	unclassified	unclassified	unclassified	16S ribosomal RNA (partial),5S ribosomal RNA	15	93	2504	96669	high
megahit_M15_bin.22	MAG-1107	M15	megahit	87.36	1.44	1492356	18201	d__Bacteria;p__Firmicutes_A;c__Clostridia;o__Oscillospirales;f__Ruminococcaceae;	Bacteria	Firmicutes_A	Clostridia	Oscillospirales	Ruminococcaceae	unclassified	unclassified	unclassified	5S ribosomal RNA	17	115	2508	56265	medium
megahit_M15_bin.37	MAG-1108	M15	megahit	87.68	1.42	1621673	7588	d__Bacteria;p__Firmicutes_C;c__Negativicutes;o__Acidaminococcales;f__Acidaminococcaceae;g__Phascolarctobacterium_A;	Bacteria	Firmicutes_C	Negativicutes	Acidaminococcales	Acidaminococcaceae	Phascolarctobacterium_A	unclassified	unclassified	16S ribosomal RNA,5S ribosomal RNA,5S ribosomal RNA	20	241	2622	29140	medium
megahit_M15_bin.5	MAG-1109	M15	megahit	80.17	5.75	1879231	12769	d__Bacteria;p__Firmicutes_A;c__Clostridia;o__Oscillospirales;f__CAG	Bacteria	Firmicutes_A	Clostridia	Oscillospirales	CAG-272	unclassified	unclassified	unclassified	5S ribosomal RNA,5S ribosomal RNA	15	198	2507	45444	medium
megahit_M15_bin.78	MAG-1110	M15	megahit	89.01	1.25	2442194	11941	d__Bacteria;p__Bacteroidota;c__Bacteroidia;o__Bacteroidales;f__Bacteroidaceae;g__UBA4372;	Bacteria	Bacteroidota	Bacteroidia	Bacteroidales	Bacteroidaceae	UBA4372	unclassified	unclassified	5S ribosomal RNA,5S ribosomal RNA,5S ribosomal RNA (partial)	19	253	2501	38088	medium
megahit_M16_bin.30	MAG-1111	M16	megahit	100	6.7	1999463	24156	d__Bacteria;p__Firmicutes;c__Bacilli;o__RF39;f__CAG	Bacteria	Firmicutes	Bacilli	RF39	CAG-1000	UBA11963	unclassified	unclassified	5S ribosomal RNA (partial),5S ribosomal RNA (partial)	20	140	2574	68652	medium
megahit_M16_bin.33	MAG-1112	M16	megahit	95.38	0.37	1462148	13642	d__Bacteria;p__Campylobacterota;c__Campylobacteria;o__Campylobacterales;f__Campylobacteraceae;g__Campylobacter;	Bacteria	Campylobacterota	Campylobacteria	Campylobacterales	Campylobacteraceae	Campylobacter	unclassified	unclassified		16	138	2527	46514	high
megahit_M18_bin.19	MAG-1113	M18	megahit	90.46	2.42	1723164	12800	d__Archaea;p__Thermoplasmatota;c__Thermoplasmata;o__Methanomassiliicoccales;f__Methanomethylophilaceae;g__ISO4	Archaea	Thermoplasmatota	Thermoplasmata	Methanomassiliicoccales	Methanomethylophilaceae	ISO4-G1	unclassified	unclassified	5S ribosomal RNA,5S ribosomal RNA,5S ribosomal RNA,16S ribosomal RNA	20	193	2524	34455	high
megahit_M18_bin.31	MAG-1114	M18	megahit	81.01	0	1455181	8738	d__Bacteria;p__Firmicutes_A;c__Clostridia;o__Oscillospirales;f__CAG	Bacteria	Firmicutes_A	Clostridia	Oscillospirales	CAG-272	CAG-448	unclassified	unclassified		17	202	2547	28822	medium
megahit_M18_bin.34	MAG-1115	M18	megahit	93.01	4.43	2381105	12611	d__Bacteria;p__Spirochaetota;c__Spirochaetia;o__Treponematales;f__Treponemataceae;g__Treponema_D;	Bacteria	Spirochaetota	Spirochaetia	Treponematales	Treponemataceae	Treponema_D	unclassified	unclassified	5S ribosomal RNA,5S ribosomal RNA	20	267	2550	79931	high
megahit_M18_bin.36	MAG-1116	M18	megahit	92.01	4.56	2853794	37660	d__Bacteria;p__Bacteroidota;c__Bacteroidia;o__Bacteroidales;f__Bacteroidaceae;g__Bacteroides_B;	Bacteria	Bacteroidota	Bacteroidia	Bacteroidales	Bacteroidaceae	Bacteroides_B	unclassified	unclassified	5S ribosomal RNA,5S ribosomal RNA,5S ribosomal RNA,5S ribosomal RNA	20	128	2529	78984	high
megahit_M18_bin.40	MAG-1117	M18	megahit	84	3.31	1616386	10849	d__Bacteria;p__Firmicutes_A;c__Clostridia;o__Oscillospirales;f__Acutalibacteraceae;g__CAG	Bacteria	Firmicutes_A	Clostridia	Oscillospirales	Acutalibacteraceae	CAG-180	unclassified	unclassified	5S ribosomal RNA	16	187	2545	54337	medium
megahit_M18_bin.44	MAG-1118	M18	megahit	93.91	0	1835323	97742	d__Bacteria;p__Bacteroidota;c__Bacteroidia;o__Bacteroidales;f__Rikenellaceae;g__Tidjanibacter;	Bacteria	Bacteroidota	Bacteroidia	Bacteroidales	Rikenellaceae	Tidjanibacter	unclassified	unclassified	5S ribosomal RNA (partial)	20	33	3092	192913	high
megahit_M18_bin.49	MAG-1119	M18	megahit	93.06	1.23	2303605	27810	d__Bacteria;p__Firmicutes_A;c__Clostridia;o__Oscillospirales;f__Oscillospiraceae;g__CAG	Bacteria	Firmicutes_A	Clostridia	Oscillospirales	Oscillospiraceae	CAG-110	unclassified	unclassified	5S ribosomal RNA	20	131	2771	94133	high
megahit_M18_bin.55	MAG-1120	M18	megahit	89.78	0	964976	64848	d__Bacteria;p__Firmicutes_A;c__Clostridia;o__4C28d	Bacteria	Firmicutes_A	Clostridia	4C28d-15	UBA1242	UBA4626	unclassified	unclassified	23S ribosomal RNA,5S ribosomal RNA,16S ribosomal RNA	20	22	2757	169458	medium
megahit_M18_bin.6	MAG-1121	M18	megahit	82.36	3.63	1907584	7675	d__Bacteria;p__Firmicutes_A;c__Clostridia;o__Oscillospirales;f__CAG	Bacteria	Firmicutes_A	Clostridia	Oscillospirales	CAG-272	unclassified	unclassified	unclassified	5S ribosomal RNA,5S ribosomal RNA (partial)	20	292	2505	37705	medium
megahit_M18_bin.62	MAG-1122	M18	megahit	92.76	1.08	1528610	12231	d__Bacteria;p__Firmicutes_A;c__Clostridia;o__4C28d	Bacteria	Firmicutes_A	Clostridia	4C28d-15	CAG-727	QALS01	unclassified	unclassified	5S ribosomal RNA	20	157	2581	36125	high
megahit_M18_bin.7	MAG-1123	M18	megahit	93.81	0.48	2019826	24160	d__Bacteria;p__Bacteroidota;c__Bacteroidia;o__Bacteroidales;f__UBA932;g__UBA1232;	Bacteria	Bacteroidota	Bacteroidia	Bacteroidales	UBA932	UBA1232	unclassified	unclassified	5S ribosomal RNA (partial)	20	116	2663	75178	high
megahit_M2_bin.13	MAG-1124	M2	megahit	92.5	0	1708420	42780	d__Bacteria;p__Proteobacteria;c__Gammaproteobacteria;o__Burkholderiales;f__Burkholderiaceae;g__CAG	Bacteria	Proteobacteria	Gammaproteobacteria	Burkholderiales	Burkholderiaceae	CAG-521	unclassified	unclassified	5S ribosomal RNA,5S ribosomal RNA	20	60	4057	99825	high
megahit_M2_bin.16	MAG-1125	M2	megahit	93.4	0.94	3520103	27424	d__Bacteria;p__Firmicutes;c__Bacilli;o__Erysipelotrichales;f__Erysipelatoclostridiaceae;g__Erysipelatoclostridium;s__Erysipelatoclostridium	Bacteria	Firmicutes	Bacilli	Erysipelotrichales	Erysipelatoclostridiaceae	Erysipelatoclostridium	Erysipelatoclostridium ramosum	unclassified	5S ribosomal RNA (partial),23S ribosomal RNA,16S ribosomal RNA	20	230	2512	93519	high
megahit_M2_bin.24	MAG-1126	M2	megahit	88.81	1.34	2157175	8195	d__Bacteria;p__Firmicutes_A;c__Clostridia;o__Oscillospirales;f__Ruminococcaceae;g__Negativibacillus;s__Negativibacillus	Bacteria	Firmicutes_A	Clostridia	Oscillospirales	Ruminococcaceae	Negativibacillus	Negativibacillus massiliensis	unclassified	5S ribosomal RNA,5S ribosomal RNA	18	304	2514	38980	medium
megahit_M2_bin.47	MAG-1127	M2	megahit	93.96	0	2154307	163447	d__Bacteria;p__Firmicutes_A;c__Clostridia;o__Lachnospirales;f__Anaerotignaceae;g__Anaerotignum;s__Anaerotignum	Bacteria	Firmicutes_A	Clostridia	Lachnospirales	Anaerotignaceae	Anaerotignum	Anaerotignum sp001304995	unclassified	5S ribosomal RNA,5S ribosomal RNA	19	26	7385	274733	high
megahit_M2_bin.8	MAG-1128	M2	megahit	90.02	0.6	2087078	71400	d__Bacteria;p__Firmicutes_C;c__Negativicutes;o__Acidaminococcales;f__Acidaminococcaceae;g__Phascolarctobacterium_A;	Bacteria	Firmicutes_C	Negativicutes	Acidaminococcales	Acidaminococcaceae	Phascolarctobacterium_A	unclassified	unclassified	5S ribosomal RNA,5S ribosomal RNA	20	48	3103	154747	high
megahit_M3_bin.21	MAG-1129	M3	megahit	93.81	0.9	2011723	59069	d__Bacteria;p__Firmicutes_C;c__Negativicutes;o__Acidaminococcales;f__Acidaminococcaceae;g__Phascolarctobacterium_A;	Bacteria	Firmicutes_C	Negativicutes	Acidaminococcales	Acidaminococcaceae	Phascolarctobacterium_A	unclassified	unclassified	5S ribosomal RNA,5S ribosomal RNA,16S ribosomal RNA (partial)	20	44	4147	176424	high
megahit_M3_bin.25	MAG-1130	M3	megahit	94.85	1.68	1887554	13387	d__Bacteria;p__Firmicutes_A;c__Clostridia;o__Lachnospirales;f__Anaerotignaceae;	Bacteria	Firmicutes_A	Clostridia	Lachnospirales	Anaerotignaceae	unclassified	unclassified	unclassified		15	180	2679	47152	high
megahit_M3_bin.26	MAG-1131	M3	megahit	96.27	0.62	2182190	39341	d__Bacteria;p__Proteobacteria;c__Gammaproteobacteria;o__Burkholderiales;f__Burkholderiaceae;g__Sutterella;s__Sutterella	Bacteria	Proteobacteria	Gammaproteobacteria	Burkholderiales	Burkholderiaceae	Sutterella	Sutterella wadsworthensis_A	unclassified		20	83	2827	197073	high
megahit_M3_bin.30	MAG-1132	M3	megahit	95.92	0	2033958	57782	d__Bacteria;p__Firmicutes_A;c__Clostridia;o__Oscillospirales;f__Ruminococcaceae;g__Faecalibacterium;	Bacteria	Firmicutes_A	Clostridia	Oscillospirales	Ruminococcaceae	Faecalibacterium	unclassified	unclassified	5S ribosomal RNA,5S ribosomal RNA,5S ribosomal RNA	20	52	2615	216596	high
megahit_M3_bin.44	MAG-1133	M3	megahit	87.26	0	1603357	22488	d__Bacteria;p__Firmicutes;c__Bacilli;o__Lactobacillales;f__Lactobacillaceae;g__Lactobacillus;s__Lactobacillus	Bacteria	Firmicutes	Bacilli	Lactobacillales	Lactobacillaceae	Lactobacillus	Lactobacillus amylovorus	unclassified		13	103	2688	94159	medium
megahit_M3_bin.49	MAG-1134	M3	megahit	96.75	0.49	2916119	36315	d__Bacteria;p__Firmicutes_A;c__Clostridia;o__Oscillospirales;f__Oscillospiraceae;g__Flavonifractor;s__Flavonifractor	Bacteria	Firmicutes_A	Clostridia	Oscillospirales	Oscillospiraceae	Flavonifractor	Flavonifractor plautii	unclassified	5S ribosomal RNA	19	119	2606	132373	high
megahit_M3_bin.8	MAG-1135	M3	megahit	91.95	2.01	1954597	36393	d__Bacteria;p__Firmicutes_A;c__Clostridia;o__Oscillospirales;f__Oscillospiraceae;g__Oscillibacter;	Bacteria	Firmicutes_A	Clostridia	Oscillospirales	Oscillospiraceae	Oscillibacter	unclassified	unclassified	5S ribosomal RNA	17	81	3299	105045	high
megahit_M3_bin.9	MAG-1136	M3	megahit	99.22	0	1967830	143032	d__Bacteria;p__Firmicutes;c__Bacilli;o__Lactobacillales;f__Lactobacillaceae;g__Lactobacillus;s__Lactobacillus	Bacteria	Firmicutes	Bacilli	Lactobacillales	Lactobacillaceae	Lactobacillus	Lactobacillus johnsonii	unclassified		19	34	2861	302071	high
megahit_M5_bin.28	MAG-1137	M5	megahit	90.45	2.96	2310173	42081	d__Bacteria;p__Bacteroidota;c__Bacteroidia;o__Bacteroidales;f__Paludibacteraceae;	Bacteria	Bacteroidota	Bacteroidia	Bacteroidales	Paludibacteraceae	unclassified	unclassified	unclassified	5S ribosomal RNA,5S ribosomal RNA,5S ribosomal RNA,5S ribosomal RNA,5S ribosomal RNA	19	96	2622	145800	high
megahit_M5_bin.31	MAG-1138	M5	megahit	84.68	1.14	1868158	6639	d__Bacteria;p__Bacteroidota;c__Bacteroidia;o__Bacteroidales;f__Barnesiellaceae;g__Barnesiella;	Bacteria	Bacteroidota	Bacteroidia	Bacteroidales	Barnesiellaceae	Barnesiella	unclassified	unclassified	5S ribosomal RNA (partial)	19	300	2534	28131	medium
megahit_M5_bin.37	MAG-1139	M5	megahit	95.95	0.71	2021230	56313	d__Bacteria;p__Bacteroidota;c__Bacteroidia;o__Bacteroidales;f__UBA932;g__CAG	Bacteria	Bacteroidota	Bacteroidia	Bacteroidales	UBA932	CAG-831	unclassified	unclassified	5S ribosomal RNA (partial),5S ribosomal RNA	20	60	2583	122796	high
megahit_M5_bin.38	MAG-1140	M5	megahit	91.69	0.76	2328382	66703	d__Bacteria;p__Bacteroidota;c__Bacteroidia;o__Bacteroidales;f__Bacteroidaceae;	Bacteria	Bacteroidota	Bacteroidia	Bacteroidales	Bacteroidaceae	unclassified	unclassified	unclassified		20	60	2542	136594	high
megahit_M5_bin.39	MAG-1141	M5	megahit	81.24	1.16	2020626	9227	d__Bacteria;p__Verrucomicrobiota;c__Verrucomicrobiae;o__Verrucomicrobiales;f__Akkermansiaceae;g__Akkermansia;	Bacteria	Verrucomicrobiota	Verrucomicrobiae	Verrucomicrobiales	Akkermansiaceae	Akkermansia	unclassified	unclassified		19	267	2517	33655	medium
megahit_M5_bin.53	MAG-1142	M5	megahit	84.41	9.38	2138995	15709	d__Bacteria;p__Bacteroidota;c__Bacteroidia;o__Bacteroidales;f__UBA932;g__RC9;	Bacteria	Bacteroidota	Bacteroidia	Bacteroidales	UBA932	RC9	unclassified	unclassified	5S ribosomal RNA (partial),5S ribosomal RNA,5S ribosomal RNA (partial),5S ribosomal RNA (partial)	16	196	2506	48207	low
megahit_M5_bin.6	MAG-1143	M5	megahit	96.92	1.08	2888361	95936	d__Bacteria;p__Bacteroidota;c__Bacteroidia;o__Bacteroidales;f__F082;g__F082;	Bacteria	Bacteroidota	Bacteroidia	Bacteroidales	F082	F082	unclassified	unclassified	23S ribosomal RNA (partial),5S ribosomal RNA,5S ribosomal RNA	20	58	2545	201001	high
megahit_M5_bin.65	MAG-1144	M5	megahit	86.09	0.67	2025752	11544	d__Bacteria;p__Firmicutes_A;c__Clostridia;o__Oscillospirales;f__CAG	Bacteria	Firmicutes_A	Clostridia	Oscillospirales	CAG-272	unclassified	unclassified	unclassified		15	217	2551	42403	medium
megahit_M6_bin.29	MAG-1145	M6	megahit	98.54	1.96	4648513	24645	d__Bacteria;p__Proteobacteria;c__Gammaproteobacteria;o__Enterobacterales;f__Enterobacteriaceae;g__Escherichia;s__Escherichia	Bacteria	Proteobacteria	Gammaproteobacteria	Enterobacterales	Enterobacteriaceae	Escherichia	Escherichia flexneri	unclassified	5S ribosomal RNA,5S ribosomal RNA,5S ribosomal RNA,5S ribosomal RNA,5S ribosomal RNA,5S ribosomal RNA	20	291	2524	81282	high
megahit_M6_bin.36	MAG-1146	M6	megahit	91.38	0.67	2342910	18745	d__Bacteria;p__Firmicutes_A;c__Clostridia;o__Oscillospirales;f__CAG	Bacteria	Firmicutes_A	Clostridia	Oscillospirales	CAG-382	unclassified	unclassified	unclassified	16S ribosomal RNA (partial),5S ribosomal RNA,5S ribosomal RNA	15	181	2512	64508	high
megahit_M6_bin.4	MAG-1147	M6	megahit	86.13	1.46	2031940	14478	d__Bacteria;p__Firmicutes_A;c__Clostridia;o__Lachnospirales;f__Lachnospiraceae;	Bacteria	Firmicutes_A	Clostridia	Lachnospirales	Lachnospiraceae	unclassified	unclassified	unclassified		13	182	2573	58339	medium
megahit_M6_bin.53	MAG-1148	M6	megahit	82.22	2.01	1822647	35100	d__Bacteria;p__Firmicutes_A;c__Clostridia;o__Oscillospirales;f__Oscillospiraceae;g__CAG	Bacteria	Firmicutes_A	Clostridia	Oscillospirales	Oscillospiraceae	CAG-110	unclassified	unclassified	5S ribosomal RNA,5S ribosomal RNA,5S ribosomal RNA,5S ribosomal RNA	20	87	2662	98750	medium
megahit_M6_bin.55	MAG-1149	M6	megahit	85.25	0.67	1496397	10560	d__Bacteria;p__Firmicutes_A;c__Clostridia;o__Oscillospirales;f__CAG	Bacteria	Firmicutes_A	Clostridia	Oscillospirales	CAG-272	unclassified	unclassified	unclassified		14	177	2541	28434	medium
megahit_M6_bin.56	MAG-1150	M6	megahit	85.16	0.04	1575209	53242	d__Bacteria;p__Firmicutes_A;c__Clostridia;o__Oscillospirales;f__CAG	Bacteria	Firmicutes_A	Clostridia	Oscillospirales	CAG-272	unclassified	unclassified	unclassified		17	49	2573	160236	medium
megahit_M6_bin.6	MAG-1151	M6	megahit	89.61	1.4	2285712	16742	d__Bacteria;p__Spirochaetota;c__Spirochaetia;o__Treponematales;f__Treponemataceae;g__Treponema_D;	Bacteria	Spirochaetota	Spirochaetia	Treponematales	Treponemataceae	Treponema_D	unclassified	unclassified	5S ribosomal RNA,16S ribosomal RNA (partial)	20	195	2502	92387	medium
megahit_M6_bin.82	MAG-1152	M6	megahit	81.47	3.36	1990077	11369	d__Bacteria;p__Firmicutes_A;c__Clostridia;o__Oscillospirales;f__CAG	Bacteria	Firmicutes_A	Clostridia	Oscillospirales	CAG-272	Firm-07	unclassified	unclassified		17	246	2511	37297	medium
megahit_M6_bin.94	MAG-1153	M6	megahit	88.12	2.03	1825861	23797	d__Bacteria;p__Firmicutes_A;c__Clostridia;o__Oscillospirales;f__CAG	Bacteria	Firmicutes_A	Clostridia	Oscillospirales	CAG-272	unclassified	unclassified	unclassified	5S ribosomal RNA (partial),5S ribosomal RNA (partial)	14	119	2544	80262	medium
megahit_M7_bin.100	MAG-1154	M7	megahit	92.62	0	2158936	57128	d__Bacteria;p__Bacteroidota;c__Bacteroidia;o__Bacteroidales;f__UBA932;g__RC9;	Bacteria	Bacteroidota	Bacteroidia	Bacteroidales	UBA932	RC9	unclassified	unclassified	5S ribosomal RNA	20	56	3661	123025	high
megahit_M7_bin.15	MAG-1155	M7	megahit	91.08	2.37	2813460	12699	d__Bacteria;p__Bacteroidota;c__Bacteroidia;o__Bacteroidales;f__Tannerellaceae;g__Parabacteroides;	Bacteria	Bacteroidota	Bacteroidia	Bacteroidales	Tannerellaceae	Parabacteroides	unclassified	unclassified	5S ribosomal RNA (partial),5S ribosomal RNA,5S ribosomal RNA (partial),5S ribosomal RNA	19	303	2547	42477	high
megahit_M7_bin.25	MAG-1156	M7	megahit	93.81	0.97	2084305	21622	d__Bacteria;p__Bacteroidota;c__Bacteroidia;o__Bacteroidales;f__UBA932;g__RC9;s__RC9	Bacteria	Bacteroidota	Bacteroidia	Bacteroidales	UBA932	RC9	RC9 sp000434935	unclassified		20	131	2582	82416	high
megahit_M7_bin.28	MAG-1157	M7	megahit	97.75	1.92	2880016	99459	d__Bacteria;p__Bacteroidota;c__Bacteroidia;o__Bacteroidales;f__Bacteroidaceae;g__Prevotella;	Bacteria	Bacteroidota	Bacteroidia	Bacteroidales	Bacteroidaceae	Prevotella	unclassified	unclassified	5S ribosomal RNA (partial),5S ribosomal RNA,23S ribosomal RNA (partial),5S ribosomal RNA (partial)	20	54	2524	174574	high
megahit_M7_bin.30	MAG-1158	M7	megahit	93.46	0.04	1787797	53680	d__Bacteria;p__Firmicutes_A;c__Clostridia;o__Oscillospirales;f__CAG	Bacteria	Firmicutes_A	Clostridia	Oscillospirales	CAG-272	UBA1740	unclassified	unclassified		18	49	2534	120013	high
megahit_M7_bin.47	MAG-1159	M7	megahit	91.43	2.15	2074617	13424	d__Bacteria;p__Bacteroidota;c__Bacteroidia;o__Bacteroidales;f__Rikenellaceae;g__Alistipes;	Bacteria	Bacteroidota	Bacteroidia	Bacteroidales	Rikenellaceae	Alistipes	unclassified	unclassified		16	204	2596	48114	high
megahit_M7_bin.52	MAG-1160	M7	megahit	85.35	6.07	2253562	8278	d__Bacteria;p__Firmicutes_A;c__Clostridia;o__Lachnospirales;f__Lachnospiraceae;	Bacteria	Firmicutes_A	Clostridia	Lachnospirales	Lachnospiraceae	unclassified	unclassified	unclassified		17	335	2517	39043	medium
megahit_M7_bin.53	MAG-1161	M7	megahit	89.46	0	1847505	17041	d__Bacteria;p__Cyanobacteria;c__Vampirovibrionia;o__Gastranaerophilales;	Bacteria	Cyanobacteria	Vampirovibrionia	Gastranaerophilales	unclassified	unclassified	unclassified	unclassified	16S ribosomal RNA,23S ribosomal RNA,5S ribosomal RNA	20	159	2504	67461	medium
megahit_M7_bin.59	MAG-1162	M7	megahit	88.79	1.61	2469846	13903	d__Bacteria;p__Firmicutes_A;c__Clostridia;o__Oscillospirales;f__CAG	Bacteria	Firmicutes_A	Clostridia	Oscillospirales	CAG-272	UBA1740	unclassified	unclassified		16	247	2528	41059	medium
megahit_M7_bin.6	MAG-1163	M7	megahit	92.3	2.38	2453881	51469	d__Bacteria;p__Bacteroidota;c__Bacteroidia;o__Bacteroidales;f__UBA932;g__RC9;	Bacteria	Bacteroidota	Bacteroidia	Bacteroidales	UBA932	RC9	unclassified	unclassified	5S ribosomal RNA	20	74	2555	144003	high
megahit_M7_bin.62	MAG-1164	M7	megahit	84.17	1.06	2520038	12555	d__Bacteria;p__Bacteroidota;c__Bacteroidia;o__Bacteroidales;f__UBA932;g__RC9;	Bacteria	Bacteroidota	Bacteroidia	Bacteroidales	UBA932	RC9	unclassified	unclassified	23S ribosomal RNA (partial),5S ribosomal RNA	14	261	2550	35978	medium
megahit_M7_bin.64	MAG-1165	M7	megahit	91.57	0.12	2657360	56766	d__Bacteria;p__Bacteroidota;c__Bacteroidia;o__Bacteroidales;f__Bacteroidaceae;g__UBA4372;	Bacteria	Bacteroidota	Bacteroidia	Bacteroidales	Bacteroidaceae	UBA4372	unclassified	unclassified		20	64	3120	215000	high
megahit_M7_bin.65	MAG-1166	M7	megahit	98.88	3.47	1598193	26045	d__Bacteria;p__Firmicutes;c__Bacilli;o__RFN20;f__CAG	Bacteria	Firmicutes	Bacilli	RFN20	CAG-449	unclassified	unclassified	unclassified	5S ribosomal RNA (partial),5S ribosomal RNA (partial)	20	97	2638	73461	high
megahit_M7_bin.70	MAG-1167	M7	megahit	83.24	0.96	1616736	9177	d__Bacteria;p__Bacteroidota;c__Bacteroidia;o__Bacteroidales;f__Rikenellaceae;g__Alistipes;	Bacteria	Bacteroidota	Bacteroidia	Bacteroidales	Rikenellaceae	Alistipes	unclassified	unclassified	5S ribosomal RNA	12	216	2501	46484	medium
megahit_M7_bin.76	MAG-1168	M7	megahit	91.23	2.71	2073028	41417	d__Bacteria;p__Firmicutes_A;c__Clostridia;o__Oscillospirales;f__CAG	Bacteria	Firmicutes_A	Clostridia	Oscillospirales	CAG-272	UBA1740	unclassified	unclassified		18	77	2852	167108	high
megahit_M7_bin.88	MAG-1169	M7	megahit	91.95	0.69	2877035	28336	d__Bacteria;p__Firmicutes_A;c__Clostridia;o__Oscillospirales;f__CAG	Bacteria	Firmicutes_A	Clostridia	Oscillospirales	CAG-272	CAG-448	unclassified	unclassified		18	161	2527	76950	high
megahit_M7_bin.93	MAG-1170	M7	megahit	95.14	0	2229066	27045	d__Bacteria;p__Firmicutes_A;c__Clostridia;o__Oscillospirales;f__CAG	Bacteria	Firmicutes_A	Clostridia	Oscillospirales	CAG-272	Firm-07	unclassified	unclassified		18	120	2633	119281	high
megahit_M7_bin.98	MAG-1171	M7	megahit	87.91	0	1023714	720748	d__Bacteria;p__Proteobacteria;c__Alphaproteobacteria;o__Rs	Bacteria	Proteobacteria	Alphaproteobacteria	Rs-D84	Rs-D84	Rs-D84	unclassified	unclassified	16S ribosomal RNA,23S ribosomal RNA	20	2	302966	720748	medium
megahit_M8_bin.2	MAG-1172	M8	megahit	89.52	6.71	2120417	23607	d__Bacteria;p__Firmicutes_A;c__Clostridia;o__Oscillospirales;f__Oscillospiraceae;g__CAG	Bacteria	Firmicutes_A	Clostridia	Oscillospirales	Oscillospiraceae	CAG-110	unclassified	unclassified	5S ribosomal RNA	20	121	2766	78367	medium
megahit_M8_bin.29	MAG-1173	M8	megahit	86.56	1.34	1651137	94480	d__Bacteria;p__Bacteroidota;c__Bacteroidia;o__Bacteroidales;f__Paludibacteraceae;g__RF16;	Bacteria	Bacteroidota	Bacteroidia	Bacteroidales	Paludibacteraceae	RF16	unclassified	unclassified		15	27	3130	264896	medium
megahit_M8_bin.34	MAG-1174	M8	megahit	92.47	0	1794049	25847	d__Bacteria;p__Bacteroidota;c__Bacteroidia;o__Bacteroidales;f__Paludibacteraceae;	Bacteria	Bacteroidota	Bacteroidia	Bacteroidales	Paludibacteraceae	unclassified	unclassified	unclassified	5S ribosomal RNA (partial),5S ribosomal RNA (partial),16S ribosomal RNA,23S ribosomal RNA (partial)	20	97	2508	83125	high
megahit_M8_bin.39	MAG-1175	M8	megahit	92.37	1.88	1969842	42036	d__Bacteria;p__Firmicutes_A;c__Clostridia;o__Oscillospirales;f__Oscillospiraceae;g__CAG	Bacteria	Firmicutes_A	Clostridia	Oscillospirales	Oscillospiraceae	CAG-110	unclassified	unclassified	16S ribosomal RNA (partial),5S ribosomal RNA,5S ribosomal RNA (partial)	17	94	2614	115423	high
megahit_M8_bin.44	MAG-1176	M8	megahit	93.65	2.68	2682926	28038	d__Bacteria;p__Firmicutes_A;c__Clostridia;o__Lachnospirales;f__Lachnospiraceae;g__CAG	Bacteria	Firmicutes_A	Clostridia	Lachnospirales	Lachnospiraceae	CAG-303	unclassified	unclassified	16S ribosomal RNA (partial)	17	144	2514	89691	high
megahit_M8_bin.47	MAG-1177	M8	megahit	97.36	0.74	2058844	98852	d__Bacteria;p__Bacteroidota;c__Bacteroidia;o__Bacteroidales;f__Rikenellaceae;g__Alistipes;	Bacteria	Bacteroidota	Bacteroidia	Bacteroidales	Rikenellaceae	Alistipes	unclassified	unclassified		20	32	4011	318543	high
megahit_M8_bin.51	MAG-1178	M8	megahit	98.08	0.48	2109154	217020	d__Bacteria;p__Bacteroidota;c__Bacteroidia;o__Bacteroidales;f__Rikenellaceae;g__Alistipes;	Bacteria	Bacteroidota	Bacteroidia	Bacteroidales	Rikenellaceae	Alistipes	unclassified	unclassified	5S ribosomal RNA,5S ribosomal RNA,5S ribosomal RNA	20	23	2942	339830	high
megahit_M8_bin.54	MAG-1179	M8	megahit	97.45	0	2447707	339020	d__Bacteria;p__Bacteroidota;c__Bacteroidia;o__Bacteroidales;f__Bacteroidaceae;g__Prevotellamassilia;	Bacteria	Bacteroidota	Bacteroidia	Bacteroidales	Bacteroidaceae	Prevotellamassilia	unclassified	unclassified	5S ribosomal RNA,5S ribosomal RNA,23S ribosomal RNA (partial)	20	19	4703	540572	high
megahit_M8_bin.55	MAG-1180	M8	megahit	89.25	0.07	1301284	8647	d__Bacteria;p__Firmicutes_A;c__Clostridia;o__4C28d	Bacteria	Firmicutes_A	Clostridia	4C28d-15	CAG-727	QALS01	unclassified	unclassified	16S ribosomal RNA (partial)	19	178	2536	25433	medium
megahit_M8_bin.59	MAG-1181	M8	megahit	91.82	0.73	2901178	11555	d__Bacteria;p__Firmicutes_A;c__Clostridia;o__Oscillospirales;f__CAG	Bacteria	Firmicutes_A	Clostridia	Oscillospirales	CAG-272	CAG-448	unclassified	unclassified	5S ribosomal RNA,5S ribosomal RNA,5S ribosomal RNA (partial),5S ribosomal RNA (partial)	19	326	2543	56262	high
megahit_M8_bin.74	MAG-1182	M8	megahit	93.29	1.78	2584830	17296	d__Bacteria;p__Proteobacteria;c__Gammaproteobacteria;o__Pseudomonadales;f__Halomonadaceae;g__Marinospirillum;s__Marinospirillum	Bacteria	Proteobacteria	Gammaproteobacteria	Pseudomonadales	Halomonadaceae	Marinospirillum	Marinospirillum minutulum	unclassified	5S ribosomal RNA,5S ribosomal RNA (partial)	20	210	2549	65058	high
megahit_M8_bin.78	MAG-1183	M8	megahit	85.83	3.01	2164859	6605	d__Bacteria;p__Proteobacteria;c__Gammaproteobacteria;o__Pseudomonadales;f__Pseudomonadaceae;g__Pseudomonas_C;s__Pseudomonas_C	Bacteria	Proteobacteria	Gammaproteobacteria	Pseudomonadales	Pseudomonadaceae	Pseudomonas_C	Pseudomonas_C caeni	unclassified		19	371	2505	30579	medium
megahit_M8_bin.8	MAG-1184	M8	megahit	87.01	3.99	2851489	21601	d__Bacteria;p__Bacteroidota;c__Bacteroidia;o__Bacteroidales;f__UBA932;g__RC9;	Bacteria	Bacteroidota	Bacteroidia	Bacteroidales	UBA932	RC9	unclassified	unclassified	5S ribosomal RNA,5S ribosomal RNA	20	229	2501	106110	medium
megahit_M8_bin.82	MAG-1185	M8	megahit	91.57	8.02	2668497	18259	d__Bacteria;p__Bacteroidota;c__Bacteroidia;o__Bacteroidales;f__UBA932;g__RC9;	Bacteria	Bacteroidota	Bacteroidia	Bacteroidales	UBA932	RC9	unclassified	unclassified	5S ribosomal RNA (partial),5S ribosomal RNA (partial)	20	232	2518	61828	medium
megahit_M8_bin.96	MAG-1186	M8	megahit	96.68	0	1792473	111620	d__Bacteria;p__Bacteroidota;c__Bacteroidia;o__Bacteroidales;f__Rikenellaceae;g__Alistipes;	Bacteria	Bacteroidota	Bacteroidia	Bacteroidales	Rikenellaceae	Alistipes	unclassified	unclassified	5S ribosomal RNA,5S ribosomal RNA	20	31	5181	206877	high
megahit_M9_bin.16	MAG-1187	M9	megahit	97.9	0.7	2377779	17077	d__Bacteria;p__Spirochaetota;c__Spirochaetia;o__Treponematales;f__Treponemataceae;g__Treponema_D;	Bacteria	Spirochaetota	Spirochaetia	Treponematales	Treponemataceae	Treponema_D	unclassified	unclassified	5S ribosomal RNA,5S ribosomal RNA,5S ribosomal RNA	20	192	2505	74131	high
megahit_M9_bin.21	MAG-1188	M9	megahit	97.41	2.08	2344621	24024	d__Bacteria;p__Firmicutes_A;c__Clostridia;o__Oscillospirales;f__CAG	Bacteria	Firmicutes_A	Clostridia	Oscillospirales	CAG-272	unclassified	unclassified	unclassified	16S ribosomal RNA (partial)	18	132	2561	83130	high
megahit_M9_bin.41	MAG-1189	M9	megahit	87.19	2.82	1908752	11705	d__Bacteria;p__Firmicutes_A;c__Clostridia;o__Oscillospirales;f__CAG	Bacteria	Firmicutes_A	Clostridia	Oscillospirales	CAG-382	unclassified	unclassified	unclassified		17	203	2504	58800	medium
megahit_M9_bin.58	MAG-1190	M9	megahit	97.54	0	2282496	52880	d__Bacteria;p__Firmicutes_A;c__Clostridia;o__Lachnospirales;f__Lachnospiraceae;g__Butyrivibrio_A;	Bacteria	Firmicutes_A	Clostridia	Lachnospirales	Lachnospiraceae	Butyrivibrio_A	unclassified	unclassified		20	77	2572	145197	high
megahit_MCN10_bin.25	MAG-1191	MCN10	megahit	88.54	2.22	1778653	29138	d__Bacteria;p__Firmicutes_A;c__Clostridia;o__Oscillospirales;f__CAG	Bacteria	Firmicutes_A	Clostridia	Oscillospirales	CAG-272	UBA1740	unclassified	unclassified		18	109	2528	130814	medium
megahit_MCN10_bin.30	MAG-1192	MCN10	megahit	82.48	9.15	1687244	7807	d__Bacteria;p__Bacteroidota;c__Bacteroidia;o__Bacteroidales;f__Rikenellaceae;g__Alistipes;	Bacteria	Bacteroidota	Bacteroidia	Bacteroidales	Rikenellaceae	Alistipes	unclassified	unclassified		10	265	2504	41452	low
megahit_MCN11_bin.22	MAG-1193	MCN11	megahit	82.76	0	1892983	21085	d__Bacteria;p__Bacteroidota;c__Bacteroidia;o__Bacteroidales;f__Paludibacteraceae;	Bacteria	Bacteroidota	Bacteroidia	Bacteroidales	Paludibacteraceae	unclassified	unclassified	unclassified	5S ribosomal RNA	17	125	2512	87538	medium
megahit_MCN11_bin.8	MAG-1194	MCN11	megahit	97.87	1.36	1966583	41767	d__Bacteria;p__Bacteroidota;c__Bacteroidia;o__Bacteroidales;f__Rikenellaceae;g__Alistipes;	Bacteria	Bacteroidota	Bacteroidia	Bacteroidales	Rikenellaceae	Alistipes	unclassified	unclassified		18	77	2534	98587	high
megahit_MCN12_bin.13	MAG-1195	MCN12	megahit	80.95	0.93	1979098	20077	d__Bacteria;p__Bacteroidota;c__Bacteroidia;o__Bacteroidales;f__Bacteroidaceae;g__UBA4372;	Bacteria	Bacteroidota	Bacteroidia	Bacteroidales	Bacteroidaceae	UBA4372	unclassified	unclassified	5S ribosomal RNA,5S ribosomal RNA (partial),5S ribosomal RNA (partial)	19	128	2640	61624	medium
megahit_MCN12_bin.23	MAG-1196	MCN12	megahit	95.92	1.36	1765010	21840	d__Bacteria;p__Firmicutes_A;c__Clostridia;o__Oscillospirales;f__CAG	Bacteria	Firmicutes_A	Clostridia	Oscillospirales	CAG-272	unclassified	unclassified	unclassified	5S ribosomal RNA (partial),5S ribosomal RNA,5S ribosomal RNA,5S ribosomal RNA,16S ribosomal RNA (partial)	20	122	2512	95035	high
megahit_MCN12_bin.28	MAG-1197	MCN12	megahit	97.99	1.34	2641172	113894	d__Bacteria;p__Firmicutes_A;c__Clostridia;o__Lachnospirales;f__Lachnospiraceae;g__CAG	Bacteria	Firmicutes_A	Clostridia	Lachnospirales	Lachnospiraceae	CAG-303	unclassified	unclassified	16S ribosomal RNA (partial)	20	49	2983	211985	high
megahit_MCN12_bin.39	MAG-1198	MCN12	megahit	90.95	2.68	2177329	57858	d__Bacteria;p__Bacteroidota;c__Bacteroidia;o__Bacteroidales;f__Bacteroidaceae;	Bacteria	Bacteroidota	Bacteroidia	Bacteroidales	Bacteroidaceae	unclassified	unclassified	unclassified	5S ribosomal RNA,5S ribosomal RNA,5S ribosomal RNA (partial),5S ribosomal RNA	18	79	2516	170026	high
megahit_MCN12_bin.42	MAG-1199	MCN12	megahit	95.66	3.61	1927354	14922	d__Bacteria;p__Bacteroidota;c__Bacteroidia;o__Bacteroidales;f__Rikenellaceae;g__Alistipes;	Bacteria	Bacteroidota	Bacteroidia	Bacteroidales	Rikenellaceae	Alistipes	unclassified	unclassified	5S ribosomal RNA,5S ribosomal RNA	18	167	2551	45200	high
megahit_MCN12_bin.47	MAG-1200	MCN12	megahit	95.09	1.45	1475141	19637	d__Bacteria;p__Firmicutes_A;c__Clostridia;o__Oscillospirales;f__CAG	Bacteria	Firmicutes_A	Clostridia	Oscillospirales	CAG-272	UBA1740	unclassified	unclassified		16	99	2504	65330	high
megahit_MCN12_bin.52	MAG-1201	MCN12	megahit	98.12	0.54	1781888	131623	d__Bacteria;p__Bacteroidota;c__Bacteroidia;o__Bacteroidales;f__Paludibacteraceae;g__RUG163;	Bacteria	Bacteroidota	Bacteroidia	Bacteroidales	Paludibacteraceae	RUG163	unclassified	unclassified	5S ribosomal RNA (partial),5S ribosomal RNA (partial)	20	17	2783	529058	high
megahit_MCN13_bin.10	MAG-1202	MCN13	megahit	87.25	0	1516782	71388	d__Bacteria;p__Firmicutes_A;c__Clostridia;o__Oscillospirales;f__Acutalibacteraceae;	Bacteria	Firmicutes_A	Clostridia	Oscillospirales	Acutalibacteraceae	unclassified	unclassified	unclassified	5S ribosomal RNA	18	32	3293	171499	medium
megahit_MCN13_bin.17	MAG-1203	MCN13	megahit	81.6	0.45	1334476	7090	d__Bacteria;p__Firmicutes_A;c__Clostridia;o__Oscillospirales;f__Oscillospiraceae;g__CAG	Bacteria	Firmicutes_A	Clostridia	Oscillospirales	Oscillospiraceae	CAG-110	unclassified	unclassified		19	219	2518	20958	medium
megahit_MCN13_bin.31	MAG-1204	MCN13	megahit	93.14	0.78	2071945	44235	d__Bacteria;p__Bacteroidota;c__Bacteroidia;o__Bacteroidales;f__UBA932;g__UBA1232;	Bacteria	Bacteroidota	Bacteroidia	Bacteroidales	UBA932	UBA1232	unclassified	unclassified	5S ribosomal RNA,5S ribosomal RNA,5S ribosomal RNA	20	78	2520	110432	high
megahit_MCN13_bin.41	MAG-1205	MCN13	megahit	88.38	5.27	2231591	27850	d__Bacteria;p__Bacteroidota;c__Bacteroidia;o__Bacteroidales;f__Bacteroidaceae;	Bacteria	Bacteroidota	Bacteroidia	Bacteroidales	Bacteroidaceae	unclassified	unclassified	unclassified	5S ribosomal RNA (partial)	20	132	2557	85862	medium
megahit_MCN13_bin.47	MAG-1206	MCN13	megahit	88.73	4.01	1696257	41440	d__Bacteria;p__Bacteroidota;c__Bacteroidia;o__Bacteroidales;f__Rikenellaceae;g__Alistipes;	Bacteria	Bacteroidota	Bacteroidia	Bacteroidales	Rikenellaceae	Alistipes	unclassified	unclassified	5S ribosomal RNA	17	75	2546	131370	medium
megahit_MCN13_bin.54	MAG-1207	MCN13	megahit	94.11	8.4	1975398	19190	d__Bacteria;p__Bacteroidota;c__Bacteroidia;o__Bacteroidales;f__Rikenellaceae;g__Alistipes;	Bacteria	Bacteroidota	Bacteroidia	Bacteroidales	Rikenellaceae	Alistipes	unclassified	unclassified	5S ribosomal RNA	18	157	2549	68018	medium
megahit_MCN14_bin.1	MAG-1208	MCN14	megahit	91.15	2.24	2554256	16492	d__Bacteria;p__Firmicutes_A;c__Clostridia;o__Oscillospirales;f__CAG	Bacteria	Firmicutes_A	Clostridia	Oscillospirales	CAG-272	CAG-448	unclassified	unclassified		13	221	2513	64804	high
megahit_MCN14_bin.20	MAG-1209	MCN14	megahit	87.7	5.7	1805315	10582	d__Bacteria;p__Firmicutes_A;c__Clostridia;o__Oscillospirales;f__CAG	Bacteria	Firmicutes_A	Clostridia	Oscillospirales	CAG-272	Firm-07	unclassified	unclassified	5S ribosomal RNA (partial)	14	229	2501	38204	medium
megahit_MCN14_bin.25	MAG-1210	MCN14	megahit	83.46	2.62	1485260	9022	d__Bacteria;p__Firmicutes_A;c__Clostridia;o__Oscillospirales;f__CAG	Bacteria	Firmicutes_A	Clostridia	Oscillospirales	CAG-272	Firm-07	unclassified	unclassified		14	189	2527	32856	medium
megahit_MCN14_bin.29	MAG-1211	MCN14	megahit	82.72	3.38	2482080	25366	d__Bacteria;p__Verrucomicrobiota;c__Kiritimatiellae;o__RFP12;f__UBA1067;g__UBA1067;	Bacteria	Verrucomicrobiota	Kiritimatiellae	RFP12	UBA1067	UBA1067	unclassified	unclassified	5S ribosomal RNA,5S ribosomal RNA	20	151	2501	78498	medium
megahit_MCN14_bin.9	MAG-1212	MCN14	megahit	90.72	1.61	2001911	17262	d__Bacteria;p__Firmicutes_A;c__Clostridia;o__Oscillospirales;f__CAG	Bacteria	Firmicutes_A	Clostridia	Oscillospirales	CAG-272	unclassified	unclassified	unclassified		15	167	2505	58011	high
megahit_MCN15_bin.2	MAG-1213	MCN15	megahit	95.43	2	2320890	59064	d__Bacteria;p__Bacteroidota;c__Bacteroidia;o__Bacteroidales;f__UBA932;g__RC9;	Bacteria	Bacteroidota	Bacteroidia	Bacteroidales	UBA932	RC9	unclassified	unclassified	5S ribosomal RNA (partial),5S ribosomal RNA (partial),23S ribosomal RNA (partial)	20	66	2903	139159	high
megahit_MCN16_bin.13	MAG-1214	MCN16	megahit	95.75	1.83	1613247	21533	d__Bacteria;p__Firmicutes_A;c__Clostridia;o__Oscillospirales;f__CAG	Bacteria	Firmicutes_A	Clostridia	Oscillospirales	CAG-272	Firm-07	unclassified	unclassified	16S ribosomal RNA (partial),5S ribosomal RNA (partial)	18	100	2628	133623	high
megahit_MCN16_bin.41	MAG-1215	MCN16	megahit	80.39	0.65	1081596	7064	d__Archaea;p__Halobacterota;c__Methanomicrobia;o__Methanomicrobiales;f__Methanocorpusculaceae;g__Methanocorpusculum;	Archaea	Halobacterota	Methanomicrobia	Methanomicrobiales	Methanocorpusculaceae	Methanocorpusculum	unclassified	unclassified		19	178	2501	35227	medium
megahit_MCN16_bin.50	MAG-1216	MCN16	megahit	88.16	1.01	2508930	25848	d__Bacteria;p__Verrucomicrobiota;c__Lentisphaeria;o__Victivallales;f__Victivallaceae;g__UBA1784;	Bacteria	Verrucomicrobiota	Lentisphaeria	Victivallales	Victivallaceae	UBA1784	unclassified	unclassified	5S ribosomal RNA,5S ribosomal RNA,16S ribosomal RNA	20	166	2501	64634	medium
megahit_MCN16_bin.53	MAG-1217	MCN16	megahit	91.7	1.36	2207743	54378	d__Bacteria;p__Firmicutes_A;c__Clostridia;o__Oscillospirales;f__CAG	Bacteria	Firmicutes_A	Clostridia	Oscillospirales	CAG-272	UBA1740	unclassified	unclassified		19	71	2545	108734	high
megahit_MCN16_bin.55	MAG-1218	MCN16	megahit	97.03	0	2576505	24226	d__Bacteria;p__Spirochaetota;c__Spirochaetia;o__Treponematales;f__Treponemataceae;g__Treponema_F;	Bacteria	Spirochaetota	Spirochaetia	Treponematales	Treponemataceae	Treponema_F	unclassified	unclassified	5S ribosomal RNA,5S ribosomal RNA,5S ribosomal RNA,5S ribosomal RNA	20	160	2521	92684	high
megahit_MCN16_bin.57	MAG-1219	MCN16	megahit	86.13	1.25	1281125	10873	d__Bacteria;p__Proteobacteria;c__Gammaproteobacteria;o__Burkholderiales;f__Burkholderiaceae;g__CAG	Bacteria	Proteobacteria	Gammaproteobacteria	Burkholderiales	Burkholderiaceae	CAG-521	unclassified	unclassified	5S ribosomal RNA,5S ribosomal RNA,5S ribosomal RNA,23S ribosomal RNA,16S ribosomal RNA	20	158	2517	31305	medium
megahit_MCN16_bin.63	MAG-1220	MCN16	megahit	86.59	5.41	3702219	10788	d__Bacteria;p__Verrucomicrobiota;c__Lentisphaeria;o__Victivallales;f__UBA1829;	Bacteria	Verrucomicrobiota	Lentisphaeria	Victivallales	UBA1829	unclassified	unclassified	unclassified		18	428	2514	44993	medium
megahit_MCN16_bin.74	MAG-1221	MCN16	megahit	93.25	0.84	1642926	12384	d__Bacteria;p__Firmicutes_A;c__Clostridia;o__Oscillospirales;f__CAG	Bacteria	Firmicutes_A	Clostridia	Oscillospirales	CAG-272	unclassified	unclassified	unclassified		16	167	2638	39199	high
megahit_MCN16_bin.80	MAG-1222	MCN16	megahit	86.24	4.73	1827861	31993	d__Bacteria;p__Firmicutes_A;c__Clostridia;o__Oscillospirales;f__CAG	Bacteria	Firmicutes_A	Clostridia	Oscillospirales	CAG-272	UBA1740	unclassified	unclassified		18	87	2684	86070	medium
megahit_MCN16_bin.81	MAG-1223	MCN16	megahit	96.57	0.22	1416022	60557	d__Bacteria;p__Firmicutes_A;c__Clostridia;o__4C28d	Bacteria	Firmicutes_A	Clostridia	4C28d-15	CAG-727	QALS01	unclassified	unclassified	5S ribosomal RNA	20	33	3497	170707	high
megahit_MCN16_bin.82	MAG-1224	MCN16	megahit	86.13	6.33	1995732	16449	d__Bacteria;p__Bacteroidota;c__Bacteroidia;o__Bacteroidales;f__Paludibacteraceae;g__RF16;	Bacteria	Bacteroidota	Bacteroidia	Bacteroidales	Paludibacteraceae	RF16	unclassified	unclassified	5S ribosomal RNA (partial)	17	184	2518	57560	medium
megahit_MCN16_bin.83	MAG-1225	MCN16	megahit	80.93	0.62	1293439	8136	d__Bacteria;p__Campylobacterota;c__Campylobacteria;o__Campylobacterales;f__Campylobacteraceae;g__Campylobacter;	Bacteria	Campylobacterota	Campylobacteria	Campylobacterales	Campylobacteraceae	Campylobacter	unclassified	unclassified		16	193	2525	32712	medium
megahit_MCN16_bin.9	MAG-1226	MCN16	megahit	82.4	2.73	2228887	47270	d__Bacteria;p__Verrucomicrobiota;c__Kiritimatiellae;o__RFP12;f__UBA1067;g__UBA1067;	Bacteria	Verrucomicrobiota	Kiritimatiellae	RFP12	UBA1067	UBA1067	unclassified	unclassified		20	65	3287	107744	medium
megahit_MCN17_bin.26	MAG-1227	MCN17	megahit	96.65	1.68	1893666	48143	d__Bacteria;p__Bacteroidota;c__Bacteroidia;o__Bacteroidales;f__Rikenellaceae;g__Alistipes;	Bacteria	Bacteroidota	Bacteroidia	Bacteroidales	Rikenellaceae	Alistipes	unclassified	unclassified		17	59	2557	161343	high
megahit_MCN17_bin.27	MAG-1228	MCN17	megahit	83.52	4.47	1977400	7130	d__Bacteria;p__Firmicutes_A;c__Clostridia;o__Oscillospirales;f__CAG	Bacteria	Firmicutes_A	Clostridia	Oscillospirales	CAG-272	QALR01	unclassified	unclassified	16S ribosomal RNA (partial)	15	326	2501	29377	medium
megahit_MCN17_bin.30	MAG-1229	MCN17	megahit	93.38	1.75	1702382	9746	d__Bacteria;p__Bacteroidota;c__Bacteroidia;o__Bacteroidales;f__Rikenellaceae;g__Alistipes;	Bacteria	Bacteroidota	Bacteroidia	Bacteroidales	Rikenellaceae	Alistipes	unclassified	unclassified		13	215	2501	30114	high
megahit_MCN17_bin.35	MAG-1230	MCN17	megahit	83.13	0.81	1295118	10344	d__Bacteria;p__Firmicutes_A;c__Clostridia;o__4C28d	Bacteria	Firmicutes_A	Clostridia	4C28d-15	CAG-727	unclassified	unclassified	unclassified		15	162	2650	51588	medium
megahit_MCN17_bin.44	MAG-1231	MCN17	megahit	95.54	4.14	2376352	57686	d__Bacteria;p__Bacteroidota;c__Bacteroidia;o__Bacteroidales;f__UBA932;g__RC9;	Bacteria	Bacteroidota	Bacteroidia	Bacteroidales	UBA932	RC9	unclassified	unclassified	5S ribosomal RNA (partial),5S ribosomal RNA (partial),5S ribosomal RNA	20	80	2575	155712	high
megahit_MCN18_bin.19	MAG-1232	MCN18	megahit	83.75	2.24	1554967	19728	d__Bacteria;p__Firmicutes_A;c__Clostridia;o__Oscillospirales;f__CAG	Bacteria	Firmicutes_A	Clostridia	Oscillospirales	CAG-272	unclassified	unclassified	unclassified	5S ribosomal RNA (partial)	19	101	2516	85063	medium
megahit_MCN18_bin.21	MAG-1233	MCN18	megahit	81.51	0.67	1225053	9621	d__Bacteria;p__Firmicutes_A;c__Clostridia;o__Oscillospirales;f__CAG	Bacteria	Firmicutes_A	Clostridia	Oscillospirales	CAG-272	unclassified	unclassified	unclassified		12	165	2561	24757	medium
megahit_MCN18_bin.35	MAG-1234	MCN18	megahit	94.52	0.06	1993268	31788	d__Bacteria;p__Firmicutes_A;c__Clostridia;o__Oscillospirales;f__CAG	Bacteria	Firmicutes_A	Clostridia	Oscillospirales	CAG-272	UBA1740	unclassified	unclassified		19	87	2660	97357	high
megahit_MCN18_bin.46	MAG-1235	MCN18	megahit	82.65	6.41	1969203	7157	d__Bacteria;p__Firmicutes_A;c__Clostridia;o__Oscillospirales;f__Oscillospiraceae;g__CAG	Bacteria	Firmicutes_A	Clostridia	Oscillospirales	Oscillospiraceae	CAG-110	unclassified	unclassified		15	301	2508	43677	medium
megahit_MCN18_bin.54	MAG-1236	MCN18	megahit	95.16	1.42	1726941	13273	d__Bacteria;p__Firmicutes_A;c__Clostridia;o__Oscillospirales;f__CAG	Bacteria	Firmicutes_A	Clostridia	Oscillospirales	CAG-272	unclassified	unclassified	unclassified		14	174	2503	42798	high
megahit_MCN18_bin.6	MAG-1237	MCN18	megahit	89.89	3.82	2358647	34701	d__Bacteria;p__Bacteroidota;c__Bacteroidia;o__Bacteroidales;f__Bacteroidaceae;	Bacteria	Bacteroidota	Bacteroidia	Bacteroidales	Bacteroidaceae	unclassified	unclassified	unclassified	5S ribosomal RNA	18	98	2541	114930	medium
megahit_MCN18_bin.64	MAG-1238	MCN18	megahit	91.16	0.78	1343799	36229	d__Bacteria;p__Firmicutes_A;c__Clostridia;o__Oscillospirales;f__CAG	Bacteria	Firmicutes_A	Clostridia	Oscillospirales	CAG-272	UBA1740	unclassified	unclassified		20	62	2542	107656	high
megahit_MCN19_bin.18	MAG-1239	MCN19	megahit	93.18	2.08	1728323	24819	d__Bacteria;p__Firmicutes_A;c__Clostridia;o__Oscillospirales;f__CAG	Bacteria	Firmicutes_A	Clostridia	Oscillospirales	CAG-272	UBA1740	unclassified	unclassified		14	100	2510	147897	high
megahit_MCN19_bin.21	MAG-1240	MCN19	megahit	94.62	2.08	1852452	25380	d__Bacteria;p__Bacteroidota;c__Bacteroidia;o__Bacteroidales;f__Rikenellaceae;g__Alistipes;	Bacteria	Bacteroidota	Bacteroidia	Bacteroidales	Rikenellaceae	Alistipes	unclassified	unclassified	5S ribosomal RNA	17	97	2715	76293	high
megahit_MCN19_bin.29	MAG-1241	MCN19	megahit	94.41	4.23	2002051	25698	d__Bacteria;p__Firmicutes_A;c__Clostridia;o__Oscillospirales;f__CAG	Bacteria	Firmicutes_A	Clostridia	Oscillospirales	CAG-272	unclassified	unclassified	unclassified		19	132	2520	104617	high
megahit_MCN19_bin.37	MAG-1242	MCN19	megahit	91.86	0.71	2169141	119820	d__Bacteria;p__Verrucomicrobiota;c__Kiritimatiellae;o__RFP12;	Bacteria	Verrucomicrobiota	Kiritimatiellae	RFP12	unclassified	unclassified	unclassified	unclassified	5S ribosomal RNA,5S ribosomal RNA,5S ribosomal RNA	20	30	3724	228179	high
megahit_MCN19_bin.60	MAG-1243	MCN19	megahit	97.2	0.04	2514040	31634	d__Bacteria;p__Spirochaetota;c__Spirochaetia;o__Treponematales;f__Treponemataceae;g__Treponema_F;	Bacteria	Spirochaetota	Spirochaetia	Treponematales	Treponemataceae	Treponema_F	unclassified	unclassified	5S ribosomal RNA,5S ribosomal RNA,5S ribosomal RNA,5S ribosomal RNA	20	130	2603	137154	high
megahit_MCN19_bin.63	MAG-1244	MCN19	megahit	90.97	0.88	1738236	30508	d__Bacteria;p__Firmicutes_A;c__Clostridia;o__Oscillospirales;f__CAG	Bacteria	Firmicutes_A	Clostridia	Oscillospirales	CAG-272	unclassified	unclassified	unclassified		16	96	2610	105377	high
megahit_MCN2_bin.34	MAG-1245	MCN2	megahit	92.16	3.62	1768358	21343	d__Bacteria;p__Bacteroidota;c__Bacteroidia;o__Bacteroidales;f__Rikenellaceae;g__Alistipes;	Bacteria	Bacteroidota	Bacteroidia	Bacteroidales	Rikenellaceae	Alistipes	unclassified	unclassified		17	120	2528	62290	high
megahit_MCN2_bin.39	MAG-1246	MCN2	megahit	91.94	0	2298358	77872	d__Bacteria;p__Bacteroidota;c__Bacteroidia;o__Bacteroidales;f__P3;g__UBA1219;	Bacteria	Bacteroidota	Bacteroidia	Bacteroidales	P3	UBA1219	unclassified	unclassified	5S ribosomal RNA (partial),5S ribosomal RNA (partial)	20	47	2700	174193	high
megahit_MCN2_bin.46	MAG-1247	MCN2	megahit	84.16	1.74	1643443	10564	d__Bacteria;p__Bacteroidota;c__Bacteroidia;o__Bacteroidales;f__UBA932;g__CAG	Bacteria	Bacteroidota	Bacteroidia	Bacteroidales	UBA932	CAG-831	unclassified	unclassified		18	200	2504	40972	medium
megahit_MCN2_bin.51	MAG-1248	MCN2	megahit	86.55	4.2	1997693	9571	d__Bacteria;p__Spirochaetota;c__Spirochaetia;o__Treponematales;f__Treponemataceae;g__Treponema_F;	Bacteria	Spirochaetota	Spirochaetia	Treponematales	Treponemataceae	Treponema_F	unclassified	unclassified	5S ribosomal RNA,5S ribosomal RNA,5S ribosomal RNA	18	265	2505	35292	medium
megahit_MCN2_bin.7	MAG-1249	MCN2	megahit	95.59	1.9	1792607	78618	d__Bacteria;p__Bacteroidota;c__Bacteroidia;o__Bacteroidales;f__Rikenellaceae;g__Alistipes;	Bacteria	Bacteroidota	Bacteroidia	Bacteroidales	Rikenellaceae	Alistipes	unclassified	unclassified		19	38	4010	154810	high
megahit_MCN20_bin.10	MAG-1250	MCN20	megahit	87	0	1671587	31896	d__Bacteria;p__Firmicutes_A;c__Clostridia;o__Oscillospirales;f__CAG	Bacteria	Firmicutes_A	Clostridia	Oscillospirales	CAG-272	unclassified	unclassified	unclassified	5S ribosomal RNA,5S ribosomal RNA	15	74	2632	135679	medium
megahit_MCN20_bin.13	MAG-1251	MCN20	megahit	96.42	0.92	1634249	53219	d__Bacteria;p__Firmicutes_A;c__Clostridia;o__Oscillospirales;f__CAG	Bacteria	Firmicutes_A	Clostridia	Oscillospirales	CAG-272	Firm-07	unclassified	unclassified	5S ribosomal RNA (partial),5S ribosomal RNA	20	52	4007	108148	high
megahit_MCN20_bin.15	MAG-1252	MCN20	megahit	91.17	3.38	1859515	19372	d__Bacteria;p__Firmicutes_A;c__Clostridia;o__Oscillospirales;f__CAG	Bacteria	Firmicutes_A	Clostridia	Oscillospirales	CAG-272	unclassified	unclassified	unclassified	5S ribosomal RNA	16	155	2523	54436	high
megahit_MCN20_bin.17	MAG-1253	MCN20	megahit	89.12	3.73	1307480	23436	d__Bacteria;p__Firmicutes_A;c__Clostridia;o__Oscillospirales;f__CAG	Bacteria	Firmicutes_A	Clostridia	Oscillospirales	CAG-272	UBA1740	unclassified	unclassified		18	88	2501	73487	medium
megahit_MCN20_bin.20	MAG-1254	MCN20	megahit	81.53	0.75	1182674	7560	d__Bacteria;p__Firmicutes_A;c__Clostridia;o__Oscillospirales;f__CAG	Bacteria	Firmicutes_A	Clostridia	Oscillospirales	CAG-272	UBA1740	unclassified	unclassified		19	185	2526	26112	medium
megahit_MCN20_bin.22	MAG-1255	MCN20	megahit	88.14	0.84	1569877	23658	d__Bacteria;p__Firmicutes_A;c__Clostridia;o__Oscillospirales;f__CAG	Bacteria	Firmicutes_A	Clostridia	Oscillospirales	CAG-272	unclassified	unclassified	unclassified		17	125	2539	70857	medium
megahit_MCN20_bin.27	MAG-1256	MCN20	megahit	80.35	2.03	1861090	10006	d__Bacteria;p__Verrucomicrobiota;c__Lentisphaeria;o__Victivallales;f__Victivallaceae;	Bacteria	Verrucomicrobiota	Lentisphaeria	Victivallales	Victivallaceae	unclassified	unclassified	unclassified		18	236	2517	30566	medium
megahit_MCN20_bin.29	MAG-1257	MCN20	megahit	91.1	5.56	2101256	71685	d__Bacteria;p__Firmicutes_A;c__Clostridia;o__Oscillospirales;f__CAG	Bacteria	Firmicutes_A	Clostridia	Oscillospirales	CAG-272	UBA1740	unclassified	unclassified		20	37	2790	171368	medium
megahit_MCN20_bin.7	MAG-1258	MCN20	megahit	85.75	2.45	1308893	9655	d__Bacteria;p__Firmicutes_A;c__Clostridia;o__4C28d	Bacteria	Firmicutes_A	Clostridia	4C28d-15	CAG-727	unclassified	unclassified	unclassified		13	164	2555	44931	medium
megahit_MCN20_bin.9	MAG-1259	MCN20	megahit	83.15	1.12	1007334	7573	d__Bacteria;p__Elusimicrobiota;c__Elusimicrobia;o__Elusimicrobiales;f__Elusimicrobiaceae;g__UBA1174;	Bacteria	Elusimicrobiota	Elusimicrobia	Elusimicrobiales	Elusimicrobiaceae	UBA1174	unclassified	unclassified		19	160	2516	25477	medium
megahit_MCN21_bin.10	MAG-1260	MCN21	megahit	84.67	2.62	2002105	29401	d__Bacteria;p__Firmicutes_A;c__Clostridia;o__Oscillospirales;f__CAG	Bacteria	Firmicutes_A	Clostridia	Oscillospirales	CAG-272	UBA1740	unclassified	unclassified		17	114	2534	119271	medium
megahit_MCN21_bin.11	MAG-1261	MCN21	megahit	88.64	0.81	1612045	15192	d__Bacteria;p__Firmicutes_A;c__Clostridia;o__4C28d	Bacteria	Firmicutes_A	Clostridia	4C28d-15	CAG-727	UBA10281	unclassified	unclassified	5S ribosomal RNA	13	149	2574	49151	medium
megahit_MCN21_bin.29	MAG-1262	MCN21	megahit	82.95	5.07	1577636	8892	d__Bacteria;p__Firmicutes_A;c__Clostridia;o__Oscillospirales;f__CAG	Bacteria	Firmicutes_A	Clostridia	Oscillospirales	CAG-272	Firm-07	unclassified	unclassified		17	222	2521	39815	medium
megahit_MCN21_bin.60	MAG-1263	MCN21	megahit	96.87	0	1436691	70998	d__Bacteria;p__Firmicutes_A;c__Clostridia;o__Oscillospirales;f__CAG	Bacteria	Firmicutes_A	Clostridia	Oscillospirales	CAG-272	UBA1740	unclassified	unclassified		20	36	3620	160668	high
megahit_MCN21_bin.69	MAG-1264	MCN21	megahit	85.44	2.32	2756585	18176	d__Bacteria;p__Verrucomicrobiota;c__Kiritimatiellae;o__RFP12;f__UBA1067;g__UBA1067;	Bacteria	Verrucomicrobiota	Kiritimatiellae	RFP12	UBA1067	UBA1067	unclassified	unclassified	5S ribosomal RNA,5S ribosomal RNA	20	221	2534	76694	medium
megahit_MCN22_bin.11	MAG-1265	MCN22	megahit	82.87	1.75	1611087	9216	d__Bacteria;p__Firmicutes_A;c__Clostridia;o__Oscillospirales;f__CAG	Bacteria	Firmicutes_A	Clostridia	Oscillospirales	CAG-272	CAG-448	unclassified	unclassified		16	216	2506	39359	medium
megahit_MCN22_bin.28	MAG-1266	MCN22	megahit	91.82	2.71	2237762	44054	d__Bacteria;p__Firmicutes_A;c__Clostridia;o__Oscillospirales;f__CAG	Bacteria	Firmicutes_A	Clostridia	Oscillospirales	CAG-272	UBA1740	unclassified	unclassified		20	79	2716	143835	high
megahit_MCN22_bin.31	MAG-1267	MCN22	megahit	90.72	1.01	1802283	13822	d__Bacteria;p__Firmicutes_A;c__Clostridia;o__Oscillospirales;f__CAG	Bacteria	Firmicutes_A	Clostridia	Oscillospirales	CAG-272	UBA1740	unclassified	unclassified		19	175	2539	75563	high
megahit_MCN22_bin.46	MAG-1268	MCN22	megahit	81.94	4.05	2688140	10878	d__Bacteria;p__Verrucomicrobiota;c__Kiritimatiellae;o__RFP12;f__UBA1067;g__UBA1731;	Bacteria	Verrucomicrobiota	Kiritimatiellae	RFP12	UBA1067	UBA1731	unclassified	unclassified	5S ribosomal RNA (partial),5S ribosomal RNA (partial)	18	325	2501	48176	medium
megahit_MCN22_bin.64	MAG-1269	MCN22	megahit	82.69	3.88	2478498	16724	d__Bacteria;p__Verrucomicrobiota;c__Kiritimatiellae;o__RFP12;f__UBA1067;g__UBA1067;	Bacteria	Verrucomicrobiota	Kiritimatiellae	RFP12	UBA1067	UBA1067	unclassified	unclassified	5S ribosomal RNA	19	211	2526	57842	medium
megahit_MCN22_bin.87	MAG-1270	MCN22	megahit	81.88	1.34	2144894	26274	d__Bacteria;p__Firmicutes_A;c__Clostridia;o__Oscillospirales;f__CAG	Bacteria	Firmicutes_A	Clostridia	Oscillospirales	CAG-272	unclassified	unclassified	unclassified		17	116	2573	70044	medium
megahit_MCN22_bin.88	MAG-1271	MCN22	megahit	93.17	8	1882251	11544	d__Bacteria;p__Firmicutes_A;c__Clostridia;o__Oscillospirales;f__CAG	Bacteria	Firmicutes_A	Clostridia	Oscillospirales	CAG-272	unclassified	unclassified	unclassified		18	207	2508	44295	medium
megahit_MCN22_bin.91	MAG-1272	MCN22	megahit	84.88	0.24	1332426	9701	d__Bacteria;p__Firmicutes_A;c__Clostridia;o__Oscillospirales;f__CAG	Bacteria	Firmicutes_A	Clostridia	Oscillospirales	CAG-272	CAG-272	unclassified	unclassified		18	173	2501	52351	medium
megahit_MCN23_bin.16	MAG-1273	MCN23	megahit	93.96	0.31	1504240	57270	d__Bacteria;p__Proteobacteria;c__Gammaproteobacteria;o__Burkholderiales;f__Burkholderiaceae;g__CAG	Bacteria	Proteobacteria	Gammaproteobacteria	Burkholderiales	Burkholderiaceae	CAG-521	unclassified	unclassified	5S ribosomal RNA,5S ribosomal RNA,5S ribosomal RNA	20	58	2571	140221	high
megahit_MCN23_bin.22	MAG-1274	MCN23	megahit	80.15	3.9	2366811	10663	d__Bacteria;p__Verrucomicrobiota;c__Kiritimatiellae;o__RFP12;f__UBA1067;g__UBA1067;	Bacteria	Verrucomicrobiota	Kiritimatiellae	RFP12	UBA1067	UBA1067	unclassified	unclassified	5S ribosomal RNA,5S ribosomal RNA,5S ribosomal RNA	20	289	2531	76154	medium
megahit_MCN23_bin.27	MAG-1275	MCN23	megahit	91.89	3.04	3548602	30448	d__Bacteria;p__Verrucomicrobiota;c__Lentisphaeria;o__Victivallales;f__Victivallaceae;	Bacteria	Verrucomicrobiota	Lentisphaeria	Victivallales	Victivallaceae	unclassified	unclassified	unclassified		20	189	2529	117840	high
megahit_MCN23_bin.28	MAG-1276	MCN23	megahit	94.36	1.51	2470714	19710	d__Bacteria;p__Firmicutes_A;c__Clostridia;o__Oscillospirales;f__CAG	Bacteria	Firmicutes_A	Clostridia	Oscillospirales	CAG-272	CAG-448	unclassified	unclassified		20	172	2622	44371	high
megahit_MCN23_bin.50	MAG-1277	MCN23	megahit	95.68	7.39	1855905	11551	d__Bacteria;p__Firmicutes_A;c__Clostridia;o__Oscillospirales;f__CAG	Bacteria	Firmicutes_A	Clostridia	Oscillospirales	CAG-272	unclassified	unclassified	unclassified	5S ribosomal RNA	15	218	2510	89385	medium
megahit_MCN23_bin.62	MAG-1278	MCN23	megahit	89.21	2.91	1756293	13191	d__Bacteria;p__Bacteroidota;c__Bacteroidia;o__Bacteroidales;f__Rikenellaceae;g__Alistipes;	Bacteria	Bacteroidota	Bacteroidia	Bacteroidales	Rikenellaceae	Alistipes	unclassified	unclassified		16	175	2524	69919	medium
megahit_MCN24_bin.14	MAG-1279	MCN24	megahit	82.39	3.58	1167851	8730	d__Bacteria;p__Firmicutes_A;c__Clostridia;o__Oscillospirales;f__CAG	Bacteria	Firmicutes_A	Clostridia	Oscillospirales	CAG-272	UBA1740	unclassified	unclassified		14	163	2549	26259	medium
megahit_MCN24_bin.20	MAG-1280	MCN24	megahit	81.77	2.61	1195698	7374	d__Bacteria;p__Firmicutes_A;c__Clostridia;o__Oscillospirales;f__CAG	Bacteria	Firmicutes_A	Clostridia	Oscillospirales	CAG-272	unclassified	unclassified	unclassified		13	193	2576	23227	medium
megahit_MCN24_bin.32	MAG-1281	MCN24	megahit	85.3	9.39	3016989	9721	d__Bacteria;p__Verrucomicrobiota;c__Lentisphaeria;o__Victivallales;f__Victivallaceae;	Bacteria	Verrucomicrobiota	Lentisphaeria	Victivallales	Victivallaceae	unclassified	unclassified	unclassified		19	391	2503	31567	low
megahit_MCN24_bin.39	MAG-1282	MCN24	megahit	83.11	2.67	2422651	11457	d__Bacteria;p__Firmicutes;c__Bacilli;o__ML615J	Bacteria	Firmicutes	Bacilli	ML615J-28	CAG-313	unclassified	unclassified	unclassified		19	272	2500	171035	medium
megahit_MCN24_bin.4	MAG-1283	MCN24	megahit	84.91	6.45	2236330	16255	d__Bacteria;p__Verrucomicrobiota;c__Kiritimatiellae;o__RFP12;f__UBA1067;g__UBA1067;	Bacteria	Verrucomicrobiota	Kiritimatiellae	RFP12	UBA1067	UBA1067	unclassified	unclassified	5S ribosomal RNA,5S ribosomal RNA	20	194	2510	54584	medium
megahit_MCN24_bin.40	MAG-1284	MCN24	megahit	87.1	7.17	1843608	10538	d__Bacteria;p__Firmicutes_A;c__Clostridia;o__Oscillospirales;f__CAG	Bacteria	Firmicutes_A	Clostridia	Oscillospirales	CAG-272	CAG-448	unclassified	unclassified		15	228	2504	46572	medium
megahit_MCN24_bin.42	MAG-1285	MCN24	megahit	94.72	0.97	1578940	32548	d__Bacteria;p__Firmicutes_A;c__Clostridia;o__Oscillospirales;f__Oscillospiraceae;g__CAG	Bacteria	Firmicutes_A	Clostridia	Oscillospirales	Oscillospiraceae	CAG-110	unclassified	unclassified	5S ribosomal RNA	20	70	2770	93803	high
megahit_MCN24_bin.53	MAG-1286	MCN24	megahit	92.22	0.31	2216683	47352	d__Bacteria;p__Bacteroidota;c__Bacteroidia;o__Bacteroidales;f__Bacteroidaceae;	Bacteria	Bacteroidota	Bacteroidia	Bacteroidales	Bacteroidaceae	unclassified	unclassified	unclassified	5S ribosomal RNA,5S ribosomal RNA,5S ribosomal RNA	19	73	3144	132721	high
megahit_MCN24_bin.6	MAG-1287	MCN24	megahit	86.59	0.15	1563620	49636	d__Bacteria;p__Firmicutes_A;c__Clostridia;o__Oscillospirales;f__CAG	Bacteria	Firmicutes_A	Clostridia	Oscillospirales	CAG-272	UBA1740	unclassified	unclassified		17	49	2638	175748	medium
megahit_MCN24_bin.61	MAG-1288	MCN24	megahit	80.92	3.99	2494710	9566	d__Bacteria;p__Verrucomicrobiota;c__Lentisphaeria;o__Victivallales;f__Victivallaceae;g__UBA1776;	Bacteria	Verrucomicrobiota	Lentisphaeria	Victivallales	Victivallaceae	UBA1776	unclassified	unclassified		20	314	2501	46191	medium
megahit_MCN24_bin.7	MAG-1289	MCN24	megahit	91.95	0	1847082	36935	d__Bacteria;p__Firmicutes_A;c__Clostridia;o__Oscillospirales;f__CAG	Bacteria	Firmicutes_A	Clostridia	Oscillospirales	CAG-272	unclassified	unclassified	unclassified		20	58	2553	184891	high
megahit_MCN24_bin.8	MAG-1290	MCN24	megahit	93.26	2.59	2145670	37751	d__Bacteria;p__Firmicutes_A;c__Clostridia;o__Oscillospirales;f__CAG	Bacteria	Firmicutes_A	Clostridia	Oscillospirales	CAG-272	UBA1740	unclassified	unclassified		18	89	2512	112403	high
megahit_MCN24_bin.9	MAG-1291	MCN24	megahit	87.93	8.54	4338127	38345	d__Bacteria;p__Verrucomicrobiota;c__Lentisphaeria;o__Victivallales;f__Victivallaceae;g__UBA1784;	Bacteria	Verrucomicrobiota	Lentisphaeria	Victivallales	Victivallaceae	UBA1784	unclassified	unclassified	16S ribosomal RNA (partial),16S ribosomal RNA (partial),23S ribosomal RNA (partial)	20	187	2508	182622	low
megahit_MCN26_bin.3	MAG-1292	MCN26	megahit	91.56	2.35	1264222	8962	d__Bacteria;p__Firmicutes_A;c__Clostridia;o__Oscillospirales;f__CAG	Bacteria	Firmicutes_A	Clostridia	Oscillospirales	CAG-272	UBA1740	unclassified	unclassified		17	171	2500	58725	high
megahit_MCN26_bin.33	MAG-1293	MCN26	megahit	83.89	2.98	2326380	9801	d__Bacteria;p__Verrucomicrobiota;c__Lentisphaeria;o__Victivallales;f__Victivallaceae;g__UBA1784;	Bacteria	Verrucomicrobiota	Lentisphaeria	Victivallales	Victivallaceae	UBA1784	unclassified	unclassified		17	293	2506	32598	medium
megahit_MCN26_bin.56	MAG-1294	MCN26	megahit	92.86	1.01	1863768	54147	d__Bacteria;p__Firmicutes_A;c__Clostridia;o__Oscillospirales;f__CAG	Bacteria	Firmicutes_A	Clostridia	Oscillospirales	CAG-272	UBA1740	unclassified	unclassified		20	67	2538	117782	high
megahit_MCN26_bin.59	MAG-1295	MCN26	megahit	93.37	3.22	2651098	22784	d__Bacteria;p__Firmicutes_A;c__Clostridia;o__Oscillospirales;f__Oscillospiraceae;g__CAG	Bacteria	Firmicutes_A	Clostridia	Oscillospirales	Oscillospiraceae	CAG-110	unclassified	unclassified	5S ribosomal RNA,5S ribosomal RNA,5S ribosomal RNA	20	173	2507	108111	high
megahit_MCN26_bin.6	MAG-1296	MCN26	megahit	96.89	2.68	1399568	23200	d__Bacteria;p__Firmicutes_A;c__Clostridia;o__Oscillospirales;f__CAG	Bacteria	Firmicutes_A	Clostridia	Oscillospirales	CAG-272	unclassified	unclassified	unclassified		18	89	2714	72937	high
megahit_MCN26_bin.7	MAG-1297	MCN26	megahit	94.6	0.71	1995083	69009	d__Bacteria;p__Firmicutes_A;c__Clostridia;o__Oscillospirales;f__CAG	Bacteria	Firmicutes_A	Clostridia	Oscillospirales	CAG-272	UBA1740	unclassified	unclassified		19	46	2504	169084	high
megahit_MCN26_bin.8	MAG-1298	MCN26	megahit	88.05	2.4	1687774	21681	d__Bacteria;p__Bacteroidota;c__Bacteroidia;o__Bacteroidales;f__Rikenellaceae;g__Alistipes;	Bacteria	Bacteroidota	Bacteroidia	Bacteroidales	Rikenellaceae	Alistipes	unclassified	unclassified	5S ribosomal RNA	17	110	3054	60469	medium
megahit_MCN27_bin.11	MAG-1299	MCN27	megahit	86.53	4.05	3197253	31517	d__Bacteria;p__Verrucomicrobiota;c__Lentisphaeria;o__Victivallales;f__Victivallaceae;	Bacteria	Verrucomicrobiota	Lentisphaeria	Victivallales	Victivallaceae	unclassified	unclassified	unclassified		20	157	2531	101209	medium
megahit_MCN27_bin.4	MAG-1300	MCN27	megahit	81.56	3.04	1391942	7674	d__Bacteria;p__Firmicutes_A;c__Clostridia;o__Oscillospirales;f__CAG	Bacteria	Firmicutes_A	Clostridia	Oscillospirales	CAG-272	Firm-07	unclassified	unclassified		18	212	2512	35880	medium
megahit_MCN27_bin.44	MAG-1301	MCN27	megahit	86.97	2.08	3553993	28688	d__Bacteria;p__Verrucomicrobiota;c__Kiritimatiellae;o__RFP12;f__UBA1067;g__UBA1731;	Bacteria	Verrucomicrobiota	Kiritimatiellae	RFP12	UBA1067	UBA1731	unclassified	unclassified	5S ribosomal RNA	20	201	2671	91106	medium
megahit_MCN27_bin.52	MAG-1302	MCN27	megahit	85.74	1.38	1955497	53833	d__Bacteria;p__Verrucomicrobiota;c__Kiritimatiellae;o__RFP12;f__UBA1067;g__UBA1067;	Bacteria	Verrucomicrobiota	Kiritimatiellae	RFP12	UBA1067	UBA1067	unclassified	unclassified	5S ribosomal RNA,5S ribosomal RNA,5S ribosomal RNA	20	53	2580	105463	medium
megahit_MCN27_bin.58	MAG-1303	MCN27	megahit	80.37	1.08	1823534	10159	d__Bacteria;p__Firmicutes_A;c__Clostridia;o__4C28d	Bacteria	Firmicutes_A	Clostridia	4C28d-15	CAG-727	QALS01	unclassified	unclassified		10	231	2522	41797	medium
megahit_MCN27_bin.61	MAG-1304	MCN27	megahit	86.74	0.34	1846402	15237	d__Bacteria;p__Firmicutes_A;c__Clostridia;o__Oscillospirales;f__CAG	Bacteria	Firmicutes_A	Clostridia	Oscillospirales	CAG-272	unclassified	unclassified	unclassified	5S ribosomal RNA (partial)	20	170	2573	68026	medium
megahit_MCN27_bin.67	MAG-1305	MCN27	megahit	87.49	4.05	1723667	28215	d__Bacteria;p__Firmicutes_A;c__Clostridia;o__Oscillospirales;f__CAG	Bacteria	Firmicutes_A	Clostridia	Oscillospirales	CAG-272	UBA1740	unclassified	unclassified		17	91	2505	92613	medium
megahit_MCN27_bin.83	MAG-1306	MCN27	megahit	94.41	3.75	2377403	15665	d__Bacteria;p__Firmicutes_A;c__Clostridia;o__Oscillospirales;f__CAG	Bacteria	Firmicutes_A	Clostridia	Oscillospirales	CAG-272	CAG-448	unclassified	unclassified		20	217	2540	94223	high
megahit_MCN28_bin.19	MAG-1307	MCN28	megahit	92.38	2.13	1757785	17433	d__Bacteria;p__Firmicutes_A;c__Clostridia;o__Oscillospirales;f__Oscillospiraceae;g__CAG	Bacteria	Firmicutes_A	Clostridia	Oscillospirales	Oscillospiraceae	CAG-110	unclassified	unclassified	5S ribosomal RNA (partial)	0	146	2545	56770	high
megahit_MCN28_bin.26	MAG-1308	MCN28	megahit	97.33	0	1784064	26313	d__Bacteria;p__Firmicutes;c__Bacilli;o__ML615J	Bacteria	Firmicutes	Bacilli	ML615J-28	CAG-698	unclassified	unclassified	unclassified	16S ribosomal RNA,5S ribosomal RNA,23S ribosomal RNA (partial)	20	114	2529	131353	high
megahit_MCN28_bin.29	MAG-1309	MCN28	megahit	86.32	9.33	1952528	9130	d__Bacteria;p__Firmicutes_A;c__Clostridia;o__Oscillospirales;f__CAG	Bacteria	Firmicutes_A	Clostridia	Oscillospirales	CAG-272	unclassified	unclassified	unclassified		16	264	2502	32480	low
megahit_MCN28_bin.51	MAG-1310	MCN28	megahit	96.68	2.48	1649484	22310	d__Bacteria;p__Bacteroidota;c__Bacteroidia;o__Bacteroidales;f__Rikenellaceae;g__Alistipes;	Bacteria	Bacteroidota	Bacteroidia	Bacteroidales	Rikenellaceae	Alistipes	unclassified	unclassified	5S ribosomal RNA	16	98	3001	63169	high
megahit_MCN28_bin.59	MAG-1311	MCN28	megahit	80.9	2.03	2336692	8293	d__Bacteria;p__Verrucomicrobiota;c__Lentisphaeria;o__Victivallales;f__Victivallaceae;g__UBA1776;	Bacteria	Verrucomicrobiota	Lentisphaeria	Victivallales	Victivallaceae	UBA1776	unclassified	unclassified		17	336	2516	48244	medium
megahit_MCN28_bin.60	MAG-1312	MCN28	megahit	84.96	2.68	1510287	34145	d__Bacteria;p__Firmicutes_A;c__Clostridia;o__Oscillospirales;f__CAG	Bacteria	Firmicutes_A	Clostridia	Oscillospirales	CAG-272	UBA1740	unclassified	unclassified		19	71	2509	94941	medium
megahit_MCN28_bin.7	MAG-1313	MCN28	megahit	92.95	0.17	1402969	15221	d__Bacteria;p__Firmicutes_A;c__Clostridia;o__Oscillospirales;f__Acutalibacteraceae;g__UBA737;	Bacteria	Firmicutes_A	Clostridia	Oscillospirales	Acutalibacteraceae	UBA737	unclassified	unclassified	5S ribosomal RNA,16S ribosomal RNA (partial)	20	132	2506	50193	high
megahit_MCN28_bin.8	MAG-1314	MCN28	megahit	96	0.84	1409777	63565	d__Bacteria;p__Firmicutes_A;c__Clostridia;o__Oscillospirales;f__Oscillospiraceae;g__CAG	Bacteria	Firmicutes_A	Clostridia	Oscillospirales	Oscillospiraceae	CAG-110	unclassified	unclassified	5S ribosomal RNA,5S ribosomal RNA,5S ribosomal RNA (partial)	20	29	3701	182338	high
megahit_MCN29_bin.28	MAG-1315	MCN29	megahit	80.24	1.81	1290697	15831	d__Bacteria;p__Firmicutes_A;c__Clostridia;o__4C28d	Bacteria	Firmicutes_A	Clostridia	4C28d-15	CAG-727	unclassified	unclassified	unclassified	5S ribosomal RNA	14	118	2588	67703	medium
megahit_MCN29_bin.35	MAG-1316	MCN29	megahit	84.91	1.68	2015939	23732	d__Bacteria;p__Firmicutes_A;c__Clostridia;o__Oscillospirales;f__CAG	Bacteria	Firmicutes_A	Clostridia	Oscillospirales	CAG-272	unclassified	unclassified	unclassified		19	138	2530	110924	medium
megahit_MCN29_bin.36	MAG-1317	MCN29	megahit	92.69	2.73	2085805	15338	d__Bacteria;p__Firmicutes_A;c__Clostridia;o__Oscillospirales;f__CAG	Bacteria	Firmicutes_A	Clostridia	Oscillospirales	CAG-272	unclassified	unclassified	unclassified		17	197	2583	49877	high
megahit_MCN29_bin.4	MAG-1318	MCN29	megahit	93.94	2.88	1800693	66462	d__Bacteria;p__Bacteroidota;c__Bacteroidia;o__Bacteroidales;f__Rikenellaceae;g__Alistipes;	Bacteria	Bacteroidota	Bacteroidia	Bacteroidales	Rikenellaceae	Alistipes	unclassified	unclassified		20	44	4170	200924	high
megahit_MCN29_bin.52	MAG-1319	MCN29	megahit	86.71	2.07	2091983	9561	d__Bacteria;p__Verrucomicrobiota;c__Lentisphaeria;o__Victivallales;f__Victivallaceae;g__UBA1784;	Bacteria	Verrucomicrobiota	Lentisphaeria	Victivallales	Victivallaceae	UBA1784	unclassified	unclassified		17	278	2507	36286	medium
megahit_MCN29_bin.56	MAG-1320	MCN29	megahit	95.59	0.51	1648801	52523	d__Bacteria;p__Bacteroidota;c__Bacteroidia;o__Bacteroidales;f__Rikenellaceae;g__Tidjanibacter;	Bacteria	Bacteroidota	Bacteroidia	Bacteroidales	Rikenellaceae	Tidjanibacter	unclassified	unclassified		20	49	2618	91487	high
megahit_MCN3_bin.15	MAG-1321	MCN3	megahit	95.51	0.93	1805319	47585	d__Bacteria;p__Bacteroidota;c__Bacteroidia;o__Bacteroidales;f__Rikenellaceae;g__Alistipes;	Bacteria	Bacteroidota	Bacteroidia	Bacteroidales	Rikenellaceae	Alistipes	unclassified	unclassified	5S ribosomal RNA	18	48	4350	184179	high
megahit_MCN3_bin.18	MAG-1322	MCN3	megahit	90.09	1.54	1658768	22246	d__Bacteria;p__Bacteroidota;c__Bacteroidia;o__Bacteroidales;f__Rikenellaceae;g__Alistipes;	Bacteria	Bacteroidota	Bacteroidia	Bacteroidales	Rikenellaceae	Alistipes	unclassified	unclassified	5S ribosomal RNA,5S ribosomal RNA	16	97	2554	74862	high
megahit_MCN3_bin.19	MAG-1323	MCN3	megahit	89.01	0.54	1749541	51040	d__Bacteria;p__Bacteroidota;c__Bacteroidia;o__Bacteroidales;f__Paludibacteraceae;	Bacteria	Bacteroidota	Bacteroidia	Bacteroidales	Paludibacteraceae	unclassified	unclassified	unclassified		19	57	2874	151573	medium
megahit_MCN3_bin.2	MAG-1324	MCN3	megahit	97.4	3.78	1919359	41091	d__Bacteria;p__Bacteroidota;c__Bacteroidia;o__Bacteroidales;f__Rikenellaceae;g__Alistipes;	Bacteria	Bacteroidota	Bacteroidia	Bacteroidales	Rikenellaceae	Alistipes	unclassified	unclassified	5S ribosomal RNA	19	79	2653	145121	high
megahit_MCN3_bin.24	MAG-1325	MCN3	megahit	81.18	2.69	1784148	10088	d__Bacteria;p__Bacteroidota;c__Bacteroidia;o__Bacteroidales;f__Paludibacteraceae;	Bacteria	Bacteroidota	Bacteroidia	Bacteroidales	Paludibacteraceae	unclassified	unclassified	unclassified	5S ribosomal RNA	18	210	2527	54748	medium
megahit_MCN3_bin.27	MAG-1326	MCN3	megahit	91.29	2.96	1731640	14739	d__Bacteria;p__Bacteroidota;c__Bacteroidia;o__Bacteroidales;f__Rikenellaceae;g__Alistipes;	Bacteria	Bacteroidota	Bacteroidia	Bacteroidales	Rikenellaceae	Alistipes	unclassified	unclassified		16	165	2501	62631	high
megahit_MCN30_bin.11	MAG-1327	MCN30	megahit	84.71	3.51	1315656	45382	d__Bacteria;p__Firmicutes_A;c__Clostridia;o__4C28d	Bacteria	Firmicutes_A	Clostridia	4C28d-15	CAG-917	unclassified	unclassified	unclassified	16S ribosomal RNA (partial),5S ribosomal RNA,23S ribosomal RNA	15	46	2532	104902	medium
[truncated: 3,633 more rows]
