# Supplementary material for: Microbial ecology along the buffalo digestive tract provides insights to their functions and interactions with the host
Source: Research Square preprint supplement (doi:10.21203/rs.3.rs-294016/v1), 2021-03-26
Supplement: Supplementary file 4 [file e6a43ae0138fd0a7c6fdfac0.xlsx]

## Sheet: Supplementary Table 1
Background information of sample collection
Sample_name	Breed	Source	Location	Sex	Growth phase
FGD10_S137_L002	Mediterranean Buffalo	Feces	China:Guangxi	Female	Adult Buffalos
FGD11_S138_L002	Mediterranean Buffalo	Feces	China:Guangxi	Female	Adult Buffalos
FGD12_S139_L002	Mediterranean Buffalo	Feces	China:Guangxi	Female	Adult Buffalos
FGD13_S140_L002	Mediterranean Buffalo	Feces	China:Guangxi	Female	Adult Buffalos
FGD14_S141_L002	Mediterranean Buffalo	Feces	China:Guangxi	Female	Adult Buffalos
FGD1_S1_L003	Mediterranean Buffalo	Feces	China:Guangxi	Female	Adult Buffalos
FGD2_S2_L003	Mediterranean Buffalo	Feces	China:Guangxi	Female	Adult Buffalos
FGD3_S3_L003	Mediterranean Buffalo	Feces	China:Guangxi	Female	Adult Buffalos
FGD4_S4_L003	Mediterranean Buffalo	Feces	China:Guangxi	Female	Adult Buffalos
FGD5_S5_L003	Mediterranean Buffalo	Feces	China:Guangxi	Female	Adult Buffalos
FGD6_S6_L003	Mediterranean Buffalo	Feces	China:Guangxi	Female	Adult Buffalos
FGD7_S7_L003	Mediterranean Buffalo	Feces	China:Guangxi	Female	Adult Buffalos
FGD8_S8_L003	Mediterranean Buffalo	Feces	China:Guangxi	Female	Adult Buffalos
FGD9_S9_L003	Mediterranean Buffalo	Feces	China:Guangxi	Female	Adult Buffalos
MGD10_S151_L002	Guang Xi river buffalo	Feces	China:Guangxi	Male	Adult Buffalos
MGD11_S152_L002	Guang Xi river buffalo	Feces	China:Guangxi	Male	Adult Buffalos
MGD12_S153_L002	Guang Xi river buffalo	Feces	China:Guangxi	Male	Adult Buffalos
MGD1_S142_L002	Guang Xi river buffalo	Feces	China:Guangxi	Male	Adult Buffalos
MGD2_S143_L002	Guang Xi river buffalo	Feces	China:Guangxi	Male	Adult Buffalos
MGD3_S144_L002	Guang Xi river buffalo	Feces	China:Guangxi	Male	Adult Buffalos
MGD4_S145_L002	Guang Xi river buffalo	Feces	China:Guangxi	Male	Adult Buffalos
MGD5_S146_L002	Guang Xi river buffalo	Feces	China:Guangxi	Male	Adult Buffalos
MGD6_S147_L002	Guang Xi river buffalo	Feces	China:Guangxi	Male	Adult Buffalos
MGD7_S148_L002	Guang Xi river buffalo	Feces	China:Guangxi	Male	Adult Buffalos
MGD8_S149_L002	Guang Xi river buffalo	Feces	China:Guangxi	Male	Adult Buffalos
MGD9_S150_L002	Guang Xi river buffalo	Feces	China:Guangxi	Male	Adult Buffalos
SBCM10_S156_L002	Guang Xi swamp buffalo	Feces	China:Guangxi	Female	Adult Buffalos
SBCM11_S163_L002	Guang Xi swamp buffalo	Feces	China:Guangxi	Female	Adult Buffalos
SBCM12_S160_L002	Guang Xi swamp buffalo	Feces	China:Guangxi	Female	Adult Buffalos
SBCM13_S158_L002	Guang Xi swamp buffalo	Feces	China:Guangxi	Female	Adult Buffalos
SBCM14_S166_L002	Guang Xi swamp buffalo	Feces	China:Guangxi	Female	Adult Buffalos
SBCM1_S159_L002	Guang Xi swamp buffalo	Feces	China:Guangxi	Female	Adult Buffalos
SBCM2_S164_L002	Guang Xi swamp buffalo	Feces	China:Guangxi	Female	Adult Buffalos
SBCM3_S154_L002	Guang Xi swamp buffalo	Feces	China:Guangxi	Female	Adult Buffalos
SBCM4_S162_L002	Guang Xi swamp buffalo	Feces	China:Guangxi	Female	Adult Buffalos
SBCM5_S155_L002	Guang Xi swamp buffalo	Feces	China:Guangxi	Female	Adult Buffalos
SBCM6_S161_L002	Guang Xi swamp buffalo	Feces	China:Guangxi	Female	Adult Buffalos
SBCM7_S157_L002	Guang Xi swamp buffalo	Feces	China:Guangxi	Female	Adult Buffalos
SBCM8_S167_L002	Guang Xi swamp buffalo	Feces	China:Guangxi	Female	Adult Buffalos
SBCM9_S165_L002	Guang Xi swamp buffalo	Feces	China:Guangxi	Female	Adult Buffalos
GBCM10_S177_L002	Guang Xi swamp buffalo	Feces	China:Guangxi	Female	Adult Buffalos
GBCM11_S172_L002	Guang Xi swamp buffalo	Feces	China:Guangxi	Female	Adult Buffalos
GBCM1_S175_L002	Guang Xi swamp buffalo	Feces	China:Guangxi	Female	Adult Buffalos
GBCM2_S178_L002	Guang Xi swamp buffalo	Feces	China:Guangxi	Female	Adult Buffalos
GBCM3_S170_L002	Guang Xi swamp buffalo	Feces	China:Guangxi	Female	Adult Buffalos
GBCM4_S168_L002	Guang Xi swamp buffalo	Feces	China:Guangxi	Female	Adult Buffalos
GBCM5_S173_L002	Guang Xi swamp buffalo	Feces	China:Guangxi	Female	Adult Buffalos
GBCM6_S174_L002	Guang Xi swamp buffalo	Feces	China:Guangxi	Female	Adult Buffalos
GBCM7_S176_L002	Guang Xi swamp buffalo	Feces	China:Guangxi	Female	Adult Buffalos
GBCM8_S171_L002	Guang Xi swamp buffalo	Feces	China:Guangxi	Female	Adult Buffalos
GBCM9_S169_L002	Guang Xi swamp buffalo	Feces	China:Guangxi	Female	Adult Buffalos
GBS1_S179_L002	Guang Xi swamp buffalo	Feces	China:Guangxi	Female	Adult Buffalos
GBS2_S180_L002	Guang Xi swamp buffalo	Feces	China:Guangxi	Female	Adult Buffalos
GBS3_S181_L002	Guang Xi swamp buffalo	Feces	China:Guangxi	Female	Adult Buffalos
GBS4_S182_L002	Guang Xi swamp buffalo	Feces	China:Guangxi	Female	Adult Buffalos
HCN1	Mediterranean Buffalo	Feces	China:Guangxi	Female	Adult Buffalos
HCN2	Mediterranean Buffalo	Feces	China:Guangxi	Female	Adult Buffalos
HCN3	Mediterranean Buffalo	Feces	China:Guangxi	Female	Adult Buffalos
HCN4	Mediterranean Buffalo	Feces	China:Guangxi	Female	Adult Buffalos
HCN5	Mediterranean Buffalo	Feces	China:Guangxi	Female	Adult Buffalos
HCN6	Mediterranean Buffalo	Feces	China:Guangxi	Female	Adult Buffalos
HCN7	Mediterranean Buffalo	Feces	China:Guangxi	Female	Adult Buffalos
HCN8	Mediterranean Buffalo	Feces	China:Guangxi	Female	Adult Buffalos
HCN9	Mediterranean Buffalo	Feces	China:Guangxi	Female	Adult Buffalos
HCN10	Mediterranean Buffalo	Feces	China:Guangxi	Female	Adult Buffalos
HCN11	Mediterranean Buffalo	Feces	China:Guangxi	Female	Adult Buffalos
HCN12	Mediterranean Buffalo	Feces	China:Guangxi	Female	Adult Buffalos
HCN13	Mediterranean Buffalo	Feces	China:Guangxi	Female	Adult Buffalos
HCN14	Mediterranean Buffalo	Feces	China:Guangxi	Female	Adult Buffalos
HCN15	Mediterranean Buffalo	Feces	China:Guangxi	Female	Adult Buffalos
HCN17	Mediterranean Buffalo	Feces	China:Guangxi	Female	Adult Buffalos
HCN18	Mediterranean Buffalo	Feces	China:Guangxi	Female	Adult Buffalos
HCN19	Mediterranean Buffalo	Feces	China:Guangxi	Female	Adult Buffalos
HCN20	Mediterranean Buffalo	Feces	China:Guangxi	Female	Adult Buffalos
HCN21	Mediterranean Buffalo	Feces	China:Guangxi	Female	Adult Buffalos
HCN22	Mediterranean Buffalo	Feces	China:Guangxi	Female	Adult Buffalos
HCN23	Mediterranean Buffalo	Feces	China:Guangxi	Female	Adult Buffalos
HCN24	Mediterranean Buffalo	Feces	China:Guangxi	Female	Adult Buffalos
HCN25	Mediterranean Buffalo	Feces	China:Guangxi	Female	Adult Buffalos
HCN26	Mediterranean Buffalo	Feces	China:Guangxi	Female	Adult Buffalos
HCN27	Mediterranean Buffalo	Feces	China:Guangxi	Female	Adult Buffalos
HCN28	Mediterranean Buffalo	Feces	China:Guangxi	Female	Adult Buffalos
HCN29	Mediterranean Buffalo	Feces	China:Guangxi	Female	Adult Buffalos
HCN30	Mediterranean Buffalo	Feces	China:Guangxi	Female	Adult Buffalos
HCN31	Mediterranean Buffalo	Feces	China:Guangxi	Female	Adult Buffalos
SNS1	Nili-Ravi buffalo breeding stock	Feces	China:Guangxi	Male	Adult Buffalos
SNS2	Nili-Ravi buffalo breeding stock	Feces	China:Guangxi	Male	Adult Buffalos
SNS3	Nili-Ravi buffalo breeding stock	Feces	China:Guangxi	Female	Adult Buffalos
SNS4	Nili-Ravi buffalo breeding stock	Feces	China:Guangxi	Female	Adult Buffalos
SNS5	Nili-Ravi buffalo breeding stock	Feces	China:Guangxi	Female	Adult Buffalos
SNS6	Nili-Ravi buffalo breeding stock	Feces	China:Guangxi	Female	Adult Buffalos
SNS7	Nili-Ravi buffalo breeding stock	Feces	China:Guangxi	Female	Adult Buffalos
SNS8	Nili-Ravi buffalo breeding stock	Feces	China:Guangxi	Female	Adult Buffalos
SNS9	Nili-Ravi buffalo breeding stock	Feces	China:Guangxi	Female	Adult Buffalos
SNS10	Nili-Ravi buffalo breeding stock	Feces	China:Guangxi	Female	Adult Buffalos
SNS12	Nili-Ravi buffalo breeding stock	Feces	China:Guangxi	Female	Adult Buffalos
SNS14	Nili-Ravi buffalo breeding stock	Feces	China:Guangxi	Male	Adult Buffalos
SNS15	Nili-Ravi buffalo breeding stock	Feces	China:Guangxi	Male	Adult Buffalos
SMS1	Murrah buffalo	Feces	China:Guangxi	Female	Adult Buffalos
SMS4	Murrah buffalo	Feces	China:Guangxi	Female	Adult Buffalos
SMS5	Murrah buffalo	Feces	China:Guangxi	Female	Adult Buffalos
SMS6	Murrah buffalo	Feces	China:Guangxi	Female	Adult Buffalos
SMS7	Murrah buffalo	Feces	China:Guangxi	Female	Adult Buffalos
SMS8	Murrah buffalo	Feces	China:Guangxi	Male	Adult Buffalos
SMS9	Murrah buffalo	Feces	China:Guangxi	Female	Adult Buffalos
SMS10	Murrah buffalo	Feces	China:Guangxi	Female	Adult Buffalos
SMS11	Murrah buffalo	Feces	China:Guangxi	Female	Adult Buffalos
SMS12	Murrah buffalo	Feces	China:Guangxi	Male	Adult Buffalos
SMS13	Murrah buffalo	Feces	China:Guangxi	Female	Adult Buffalos
SMS14	Murrah buffalo	Feces	China:Guangxi	Female	Adult Buffalos
HDN7	Mediterranean Buffalo	Feces	China:Guangxi	Male	Adult Buffalos
HDN8	Mediterranean Buffalo	Feces	China:Guangxi	Male	Adult Buffalos
HDN9	Mediterranean Buffalo	Feces	China:Guangxi	Male	Adult Buffalos
HDN5	Mediterranean Buffalo	Feces	China:Guangxi	Male	Adult Buffalos
HDN2	Mediterranean Buffalo	Feces	China:Guangxi	Male	Adult Buffalos
HDN3	Mediterranean Buffalo	Feces	China:Guangxi	Female	Adult Buffalos
HDN6	Mediterranean Buffalo	Feces	China:Guangxi	Female	Adult Buffalos
HDN10	Mediterranean Buffalo	Feces	China:Guangxi	Female	Adult Buffalos
HDN1	Mediterranean Buffalo	Feces	China:Guangxi	Female	Adult Buffalos
HDN4	Mediterranean Buffalo	Feces	China:Guangxi	Female	Adult Buffalos
SZCM1	hybrid buffalo	Feces	China:Guangxi	Female	Adult Buffalos
SZCM2	hybrid buffalo	Feces	China:Guangxi	Female	Adult Buffalos
SZCM3	hybrid buffalo	Feces	China:Guangxi	Female	Adult Buffalos
SZCM4	hybrid buffalo	Feces	China:Guangxi	Female	Adult Buffalos
SZCM5	hybrid buffalo	Feces	China:Guangxi	Female	Adult Buffalos
SZCM6	hybrid buffalo	Feces	China:Guangxi	Female	Adult Buffalos
SZCM7	hybrid buffalo	Feces	China:Guangxi	Female	Adult Buffalos
SZCM8	hybrid buffalo	Feces	China:Guangxi	Female	Adult Buffalos
SZCM9	hybrid buffalo	Feces	China:Guangxi	Female	Adult Buffalos
SZCM10	hybrid buffalo	Feces	China:Guangxi	Female	Adult Buffalos
SZCM11	hybrid buffalo	Feces	China:Guangxi	Female	Adult Buffalos
SZCM12	hybrid buffalo	Feces	China:Guangxi	Female	Adult Buffalos
SZCM13	hybrid buffalo	Feces	China:Guangxi	Female	Adult Buffalos
SZCM14	hybrid buffalo	Feces	China:Guangxi	Female	Adult Buffalos
SZCM15	hybrid buffalo	Feces	China:Guangxi	Female	Adult Buffalos
SZCM16	hybrid buffalo	Feces	China:Guangxi	Female	Adult Buffalos
SZCM17	hybrid buffalo	Feces	China:Guangxi	Female	Adult Buffalos
SZCM18	hybrid buffalo	Feces	China:Guangxi	Female	Adult Buffalos
SZCM19	hybrid buffalo	Feces	China:Guangxi	Female	Adult Buffalos
SZCM20	hybrid buffalo	Feces	China:Guangxi	Female	Adult Buffalos
SZCM21	hybrid buffalo	Feces	China:Guangxi	Female	Adult Buffalos
SZCM22	hybrid buffalo	Feces	China:Guangxi	Female	Adult Buffalos
SZCM23	hybrid buffalo	Feces	China:Guangxi	Female	Adult Buffalos
SZCM24	hybrid buffalo	Feces	China:Guangxi	Female	Adult Buffalos
SZCM25	hybrid buffalo	Feces	China:Guangxi	Female	Adult Buffalos
SZCM26	hybrid buffalo	Feces	China:Guangxi	Female	Adult Buffalos
SZCM27	hybrid buffalo	Feces	China:Guangxi	Female	Adult Buffalos
SZCM28	hybrid buffalo	Feces	China:Guangxi	Female	Adult Buffalos
SZCM29	hybrid buffalo	Feces	China:Guangxi	Female	Adult Buffalos
SZCM30	hybrid buffalo	Feces	China:Guangxi	Female	Adult Buffalos
LCN1	Guang Xi swamp buffalo	Feces	China:Guangxi	Female	Adult Buffalos
LCN2	Guang Xi swamp buffalo	Feces	China:Guangxi	Female	Adult Buffalos
LCN3	Guang Xi swamp buffalo	Feces	China:Guangxi	Female	Adult Buffalos
LCN4	Guang Xi swamp buffalo	Feces	China:Guangxi	Male	Adult Buffalos
LCN5	Guang Xi swamp buffalo	Feces	China:Guangxi	Female	Adult Buffalos
LCN6	Guang Xi swamp buffalo	Feces	China:Guangxi	Female	Adult Buffalos
LCN7	Guang Xi swamp buffalo	Feces	China:Guangxi	Female	Adult Buffalos
LCN8	Guang Xi swamp buffalo	Feces	China:Guangxi	Female	Adult Buffalos
LCN9	Guang Xi swamp buffalo	Feces	China:Guangxi	Female	Adult Buffalos
LCN10	Guang Xi swamp buffalo	Feces	China:Guangxi	Female	Adult Buffalos
LCN11	Guang Xi swamp buffalo	Feces	China:Guangxi	Female	Adult Buffalos
LCN12	Guang Xi swamp buffalo	Feces	China:Guangxi	Female	Adult Buffalos
LCN13	Guang Xi swamp buffalo	Feces	China:Guangxi	Male	Adult Buffalos
LCN14	Guang Xi swamp buffalo	Feces	China:Guangxi	Female	Adult Buffalos
LCN15	Guang Xi swamp buffalo	Feces	China:Guangxi	Female	Adult Buffalos
LCN16	Guang Xi swamp buffalo	Feces	China:Guangxi	Female	Adult Buffalos
LCN17	Guang Xi swamp buffalo	Feces	China:Guangxi	Female	Adult Buffalos
LCN18	Guang Xi swamp buffalo	Feces	China:Guangxi	Female	Adult Buffalos
LCN19	Guang Xi swamp buffalo	Feces	China:Guangxi	Female	Adult Buffalos
LCN20	Guang Xi swamp buffalo	Feces	China:Guangxi	Female	Adult Buffalos
LCN21	Guang Xi swamp buffalo	Feces	China:Guangxi	Female	Adult Buffalos
LCN22	Guang Xi swamp buffalo	Feces	China:Guangxi	Female	Adult Buffalos
LCN23	Guang Xi swamp buffalo	Feces	China:Guangxi	Female	Adult Buffalos
LCN24	Guang Xi swamp buffalo	Feces	China:Guangxi	Female	Adult Buffalos
LCN25	Guang Xi swamp buffalo	Feces	China:Guangxi	Female	Adult Buffalos
XBCN	Xin Yang swamp buffalo	Feces	China:Henan	Female	Adult Buffalos
XBCN1	Xin Yang swamp buffalo	Feces	China:Henan	Female	Adult Buffalos
XBCN12	Xin Yang swamp buffalo	Feces	China:Henan	Female	Adult Buffalos
XBCN16	Xin Yang swamp buffalo	Feces	China:Henan	Female	Adult Buffalos
XBCN18	Xin Yang swamp buffalo	Feces	China:Henan	Female	Adult Buffalos
XBCN2	Xin Yang swamp buffalo	Feces	China:Henan	Female	Adult Buffalos
XBCN24	Xin Yang swamp buffalo	Feces	China:Henan	Female	Adult Buffalos
XBCN25	Xin Yang swamp buffalo	Feces	China:Henan	Female	Adult Buffalos
XBCN28	Xin Yang swamp buffalo	Feces	China:Henan	Female	Adult Buffalos
XBCN29	Xin Yang swamp buffalo	Feces	China:Henan	Female	Adult Buffalos
XBCN3	Xin Yang swamp buffalo	Feces	China:Henan	Female	Adult Buffalos
XBCN30	Xin Yang swamp buffalo	Feces	China:Henan	Female	Adult Buffalos
XBCN31	Xin Yang swamp buffalo	Feces	China:Henan	Female	Adult Buffalos
XBCN32	Xin Yang swamp buffalo	Feces	China:Henan	Female	Adult Buffalos
XBCN34	Xin Yang swamp buffalo	Feces	China:Henan	Female	Adult Buffalos
XBCN35	Xin Yang swamp buffalo	Feces	China:Henan	Female	Adult Buffalos
XBCN6	Xin Yang swamp buffalo	Feces	China:Henan	Female	Adult Buffalos
XBCN9	Xin Yang swamp buffalo	Feces	China:Henan	Female	Adult Buffalos
XBDN1	Xin Yang swamp buffalo	Feces	China:Henan	Female	Adult Buffalos
XBDN2	Xin Yang swamp buffalo	Feces	China:Henan	Female	Adult Buffalos
XBDN3	Xin Yang swamp buffalo	Feces	China:Henan	Female	Adult Buffalos
XBDN4	Xin Yang swamp buffalo	Feces	China:Henan	Female	Adult Buffalos
XBDN5	Xin Yang swamp buffalo	Feces	China:Henan	Female	Adult Buffalos
XBDN6	Xin Yang swamp buffalo	Feces	China:Henan	Female	Adult Buffalos
XBDN7	Xin Yang swamp buffalo	Feces	China:Henan	Female	Adult Buffalos
XBCN10	Xin Yang swamp buffalo	Feces	China:Henan	Female	Adult Buffalos
XBCN11	Xin Yang swamp buffalo	Feces	China:Henan	Female	Adult Buffalos
XBCN13	Xin Yang swamp buffalo	Feces	China:Henan	Female	Adult Buffalos
XBCN14	Xin Yang swamp buffalo	Feces	China:Henan	Female	Adult Buffalos
XBCN15	Xin Yang swamp buffalo	Feces	China:Henan	Female	Adult Buffalos
XBCN17	Xin Yang swamp buffalo	Feces	China:Henan	Female	Adult Buffalos
XBCN19	Xin Yang swamp buffalo	Feces	China:Henan	Female	Adult Buffalos
XBCN20	Xin Yang swamp buffalo	Feces	China:Henan	Female	Adult Buffalos
XBCN21	Xin Yang swamp buffalo	Feces	China:Henan	Female	Adult Buffalos
XBCN22	Xin Yang swamp buffalo	Feces	China:Henan	Female	Adult Buffalos
XBCN26	Xin Yang swamp buffalo	Feces	China:Henan	Female	Adult Buffalos
XBCN27	Xin Yang swamp buffalo	Feces	China:Henan	Female	Adult Buffalos
XBCN33	Xin Yang swamp buffalo	Feces	China:Henan	Female	Adult Buffalos
XBCN5	Xin Yang swamp buffalo	Feces	China:Henan	Female	Adult Buffalos
XBCN7	Xin Yang swamp buffalo	Feces	China:Henan	Female	Adult Buffalos
XBCN8	Xin Yang swamp buffalo	Feces	China:Henan	Female	Adult Buffalos
ABCN1	An Hui swamp buffalo	Feces	China: Anhui	Female	Adult Buffalos
ABCN10	An Hui swamp buffalo	Feces	China: Anhui	Female	Adult Buffalos
ABCN11	An Hui swamp buffalo	Feces	China: Anhui	Female	Adult Buffalos
ABCN12	An Hui swamp buffalo	Feces	China: Anhui	Female	Adult Buffalos
ABCN13	An Hui swamp buffalo	Feces	China: Anhui	Female	Adult Buffalos
ABCN14	An Hui swamp buffalo	Feces	China: Anhui	Female	Adult Buffalos
ABCN15	An Hui swamp buffalo	Feces	China: Anhui	Female	Adult Buffalos
ABCN16	An Hui swamp buffalo	Feces	China: Anhui	Female	Adult Buffalos
ABCN17	An Hui swamp buffalo	Feces	China: Anhui	Female	Adult Buffalos
ABCN18	An Hui swamp buffalo	Feces	China: Anhui	Female	Adult Buffalos
ABCN19	An Hui swamp buffalo	Feces	China: Anhui	Female	Adult Buffalos
ABCN2	An Hui swamp buffalo	Feces	China: Anhui	Female	Adult Buffalos
ABCN20	An Hui swamp buffalo	Feces	China: Anhui	Female	Adult Buffalos
ABCN21	An Hui swamp buffalo	Feces	China: Anhui	Female	Adult Buffalos
ABCN22	An Hui swamp buffalo	Feces	China: Anhui	Female	Adult Buffalos
ABCN23	An Hui swamp buffalo	Feces	China: Anhui	Female	Adult Buffalos
ABCN24	An Hui swamp buffalo	Feces	China: Anhui	Female	Adult Buffalos
ABCN25	An Hui swamp buffalo	Feces	China: Anhui	Female	Adult Buffalos
ABCN26	An Hui swamp buffalo	Feces	China: Anhui	Female	Adult Buffalos
ABCN27	An Hui swamp buffalo	Feces	China: Anhui	Female	Adult Buffalos
ABCN28	An Hui swamp buffalo	Feces	China: Anhui	Female	Adult Buffalos
ABCN29	An Hui swamp buffalo	Feces	China: Anhui	Female	Adult Buffalos
ABCN3	An Hui swamp buffalo	Feces	China: Anhui	Female	Adult Buffalos
ABCN30	An Hui swamp buffalo	Feces	China: Anhui	Female	Adult Buffalos
ABCN31	An Hui swamp buffalo	Feces	China: Anhui	Female	Adult Buffalos
ABCN32	An Hui swamp buffalo	Feces	China: Anhui	Female	Adult Buffalos
ABCN33	An Hui swamp buffalo	Feces	China: Anhui	Female	Adult Buffalos
ABCN4	An Hui swamp buffalo	Feces	China: Anhui	Female	Adult Buffalos
ABCN5	An Hui swamp buffalo	Feces	China: Anhui	Female	Adult Buffalos
ABCN6	An Hui swamp buffalo	Feces	China: Anhui	Female	Adult Buffalos
ABCN7	An Hui swamp buffalo	Feces	China: Anhui	Female	Adult Buffalos
ABCN8	An Hui swamp buffalo	Feces	China: Anhui	Female	Adult Buffalos
ABCN9	An Hui swamp buffalo	Feces	China: Anhui	Female	Adult Buffalos
ABDN1	An Hui swamp buffalo	Feces	China: Anhui	Female	Adult Buffalos
ABGD10	An Hui swamp buffalo	Feces	China: Anhui	Female	Adult Buffalos
ABGD11	An Hui swamp buffalo	Feces	China: Anhui	Female	Adult Buffalos
ABGD2	An Hui swamp buffalo	Feces	China: Anhui	Female	Adult Buffalos
ABGD3	An Hui swamp buffalo	Feces	China: Anhui	Female	Adult Buffalos
ABGD4	An Hui swamp buffalo	Feces	China: Anhui	Female	Adult Buffalos
ABGD5	An Hui swamp buffalo	Feces	China: Anhui	Female	Adult Buffalos
ABGD6	An Hui swamp buffalo	Feces	China: Anhui	Female	Adult Buffalos
ABGD7	An Hui swamp buffalo	Feces	China: Anhui	Female	Adult Buffalos
ABGD8	An Hui swamp buffalo	Feces	China: Anhui	Female	Adult Buffalos
ABGD9	An Hui swamp buffalo	Feces	China: Anhui	Female	Adult Buffalos
BLJ1	Penang river buffalo	Feces	China: Yunnan	Female	Adult Buffalos
BLJ10	Penang river buffalo	Feces	China: Yunnan	Female	Adult Buffalos
BLJ11	Penang river buffalo	Feces	China: Yunnan	Female	Adult Buffalos
BLJ12	Penang river buffalo	Feces	China: Yunnan	Female	Adult Buffalos
BLJ13	Penang river buffalo	Feces	China: Yunnan	Female	Adult Buffalos
BLJ14	Penang river buffalo	Feces	China: Yunnan	Female	Adult Buffalos
BLJ15	Penang river buffalo	Feces	China: Yunnan	Female	Adult Buffalos
BLJ16	Penang river buffalo	Feces	China: Yunnan	Female	Adult Buffalos
BLJ17	Penang river buffalo	Feces	China: Yunnan	Female	Adult Buffalos
BLJ18	Penang river buffalo	Feces	China: Yunnan	Female	Adult Buffalos
BLJ19	Penang river buffalo	Feces	China: Yunnan	Female	Adult Buffalos
BLJ20	Penang river buffalo	Feces	China: Yunnan	Female	Adult Buffalos
BLJ21	Penang river buffalo	Feces	China: Yunnan	Female	Adult Buffalos
BLJ22	Penang river buffalo	Feces	China: Yunnan	Female	Adult Buffalos
BLJ23	Penang river buffalo	Feces	China: Yunnan	Female	Adult Buffalos
BLJ24	Penang river buffalo	Feces	China: Yunnan	Female	Adult Buffalos
BLJ25	Penang river buffalo	Feces	China: Yunnan	Female	Adult Buffalos
BLJ26	Penang river buffalo	Feces	China: Yunnan	Female	Adult Buffalos
BLJ27	Penang river buffalo	Feces	China: Yunnan	Female	Adult Buffalos
BLJ28	Penang river buffalo	Feces	China: Yunnan	Female	Adult Buffalos
BLJ29	Penang river buffalo	Feces	China: Yunnan	Female	Adult Buffalos
BLJ30	Penang river buffalo	Feces	China: Yunnan	Female	Adult Buffalos
BLJ31	Penang river buffalo	Feces	China: Yunnan	Female	Adult Buffalos
BLJ32	Penang river buffalo	Feces	China: Yunnan	Female	Adult Buffalos
BLJ33	Penang river buffalo	Feces	China: Yunnan	Female	Adult Buffalos
BLJ35	Penang river buffalo	Feces	China: Yunnan	Female	Adult Buffalos
BLJ5	Penang river buffalo	Feces	China: Yunnan	Female	Adult Buffalos
BLJ6	Penang river buffalo	Feces	China: Yunnan	Female	Adult Buffalos
BLJ7	Penang river buffalo	Feces	China: Yunnan	Female	Adult Buffalos
BLJ8	Penang river buffalo	Feces	China: Yunnan	Female	Adult Buffalos
BLJ9	Penang river buffalo	Feces	China: Yunnan	Female	Adult Buffalos
MCN14	Myanmar swamp buffalo	Feces	Myanmar	Male	Adult Buffalos
MCN15	Myanmar swamp buffalo	Feces	Myanmar	Male	Adult Buffalos
MCN16	Myanmar swamp buffalo	Feces	Myanmar	Male	Adult Buffalos
MCN17	Myanmar swamp buffalo	Feces	Myanmar	Male	Adult Buffalos
MCN18	Myanmar swamp buffalo	Feces	Myanmar	Male	Adult Buffalos
MCN19	Myanmar swamp buffalo	Feces	Myanmar	Female	Adult Buffalos
MCN20	Myanmar swamp buffalo	Feces	Myanmar	Female	Adult Buffalos
MCN21	Myanmar swamp buffalo	Feces	Myanmar	Female	Adult Buffalos
MCN22	Myanmar swamp buffalo	Feces	Myanmar	Female	Adult Buffalos
MCN23	Myanmar swamp buffalo	Feces	Myanmar	Female	Adult Buffalos
MCN24	Myanmar swamp buffalo	Feces	Myanmar	Female	Adult Buffalos
MCN26	Myanmar swamp buffalo	Feces	Myanmar	Female	Adult Buffalos
MCN27	Myanmar swamp buffalo	Feces	Myanmar	Female	Adult Buffalos
MCN28	Myanmar swamp buffalo	Feces	Myanmar	Female	Adult Buffalos
MCN29	Myanmar swamp buffalo	Feces	Myanmar	Female	Adult Buffalos
MCN30	Myanmar swamp buffalo	Feces	Myanmar	Female	Adult Buffalos
MCN31	Myanmar swamp buffalo	Feces	Myanmar	Female	Adult Buffalos
MCN32	Myanmar swamp buffalo	Feces	Myanmar	Female	Adult Buffalos
MCN33	Myanmar swamp buffalo	Feces	Myanmar	Female	Adult Buffalos
YCN20	De Hong swamp buffalo	Feces	China: Yunnan	Female	Adult Buffalos
YCN26	De Hong swamp buffalo	Feces	China: Yunnan	Female	Adult Buffalos
YCN4	De Hong swamp buffalo	Feces	China: Yunnan	Female	Adult Buffalos
YCN7	De Hong swamp buffalo	Feces	China: Yunnan	Female	Adult Buffalos
YCN8	De Hong swamp buffalo	Feces	China: Yunnan	Female	Adult Buffalos
MCN10	Myanmar swamp buffalo	Feces	Myanmar	Male	Adult Buffalos
MCN11	Myanmar swamp buffalo	Feces	Myanmar	Male	Adult Buffalos
MCN12	Myanmar swamp buffalo	Feces	Myanmar	Male	Adult Buffalos
MCN13	Myanmar swamp buffalo	Feces	Myanmar	Female	Adult Buffalos
MCN2	Myanmar swamp buffalo	Feces	Myanmar	Male	Adult Buffalos
MCN3	Myanmar swamp buffalo	Feces	Myanmar	Male	Adult Buffalos
MCN35	Myanmar swamp buffalo	Feces	Myanmar	Female	Adult Buffalos
MCN4	Myanmar swamp buffalo	Feces	Myanmar	Male	Adult Buffalos
MCN5	Myanmar swamp buffalo	Feces	Myanmar	Male	Adult Buffalos
MCN6	Myanmar swamp buffalo	Feces	Myanmar	Male	Adult Buffalos
MCN7	Myanmar swamp buffalo	Feces	Myanmar	Male	Adult Buffalos
MCN8	Myanmar swamp buffalo	Feces	Myanmar	Male	Adult Buffalos
YCN10	De Hong swamp buffalo	Feces	China: Yunnan	Female	Adult Buffalos
YCN11	De Hong swamp buffalo	Feces	China: Yunnan	Female	Adult Buffalos
YCN12	De Hong swamp buffalo	Feces	China: Yunnan	Female	Adult Buffalos
YCN14	De Hong swamp buffalo	Feces	China: Yunnan	Female	Adult Buffalos
YCN15	De Hong swamp buffalo	Feces	China: Yunnan	Female	Adult Buffalos
YCN16	De Hong swamp buffalo	Feces	China: Yunnan	Female	Adult Buffalos
YCN17	De Hong swamp buffalo	Feces	China: Yunnan	Female	Adult Buffalos
YCN18	De Hong swamp buffalo	Feces	China: Yunnan	Female	Adult Buffalos
YCN19	De Hong swamp buffalo	Feces	China: Yunnan	Female	Adult Buffalos
YCN21	De Hong swamp buffalo	Feces	China: Yunnan	Female	Adult Buffalos
YCN22	De Hong swamp buffalo	Feces	China: Yunnan	Female	Adult Buffalos
YCN23	De Hong swamp buffalo	Feces	China: Yunnan	Female	Adult Buffalos
YCN24	De Hong swamp buffalo	Feces	China: Yunnan	Female	Adult Buffalos
YCN25	De Hong swamp buffalo	Feces	China: Yunnan	Female	Adult Buffalos
YCN27	De Hong swamp buffalo	Feces	China: Yunnan	Female	Adult Buffalos
YCN28	De Hong swamp buffalo	Feces	China: Yunnan	Female	Adult Buffalos
YCN29	De Hong swamp buffalo	Feces	China: Yunnan	Female	Adult Buffalos
YCN30	De Hong swamp buffalo	Feces	China: Yunnan	Female	Adult Buffalos
YCN31	De Hong swamp buffalo	Feces	China: Yunnan	Female	Adult Buffalos
YCN32	De Hong swamp buffalo	Feces	China: Yunnan	Female	Adult Buffalos
YCN33	De Hong swamp buffalo	Feces	China: Yunnan	Female	Adult Buffalos
YCN34	De Hong swamp buffalo	Feces	China: Yunnan	Female	Adult Buffalos
YCN35	De Hong swamp buffalo	Feces	China: Yunnan	Female	Adult Buffalos
YCN5	De Hong swamp buffalo	Feces	China: Yunnan	Female	Adult Buffalos
YCN6	De Hong swamp buffalo	Feces	China: Yunnan	Female	Adult Buffalos
YCN9	De Hong swamp buffalo	Feces	China: Yunnan	Female	Adult Buffalos
KCN10	Hai Nan swamp buffalo	Feces	China:Hainan	Female	Adult Buffalos
KCN11	Hai Nan swamp buffalo	Feces	China:Hainan	Female	Adult Buffalos
KCN12	Hai Nan swamp buffalo	Feces	China:Hainan	Female	Adult Buffalos
KCN13	Hai Nan swamp buffalo	Feces	China:Hainan	Female	Adult Buffalos
KCN15	Hai Nan swamp buffalo	Feces	China:Hainan	Female	Adult Buffalos
KCN16	Hai Nan swamp buffalo	Feces	China:Hainan	Female	Adult Buffalos
KCN17	Hai Nan swamp buffalo	Feces	China:Hainan	Female	Adult Buffalos
KCN18	Hai Nan swamp buffalo	Feces	China:Hainan	Female	Adult Buffalos
KCN19	Hai Nan swamp buffalo	Feces	China:Hainan	Female	Adult Buffalos
KCN2	Hai Nan swamp buffalo	Feces	China:Hainan	Female	Adult Buffalos
KCN20	Hai Nan swamp buffalo	Feces	China:Hainan	Female	Adult Buffalos
KCN21	Hai Nan swamp buffalo	Feces	China:Hainan	Female	Adult Buffalos
KCN22	Hai Nan swamp buffalo	Feces	China:Hainan	Female	Adult Buffalos
KCN23	Hai Nan swamp buffalo	Feces	China:Hainan	Female	Adult Buffalos
KCN25	Hai Nan swamp buffalo	Feces	China:Hainan	Female	Adult Buffalos
KCN26	Hai Nan swamp buffalo	Feces	China:Hainan	Female	Adult Buffalos
KCN29	Hai Nan swamp buffalo	Feces	China:Hainan	Female	Adult Buffalos
KCN3	Hai Nan swamp buffalo	Feces	China:Hainan	Female	Adult Buffalos
KCN30	Hai Nan swamp buffalo	Feces	China:Hainan	Female	Adult Buffalos
KCN31	Hai Nan swamp buffalo	Feces	China:Hainan	Female	Adult Buffalos
KCN32	Hai Nan swamp buffalo	Feces	China:Hainan	Female	Adult Buffalos
KCN33	Hai Nan swamp buffalo	Feces	China:Hainan	Female	Adult Buffalos
KCN35	Hai Nan swamp buffalo	Feces	China:Hainan	Female	Adult Buffalos
KCN4	Hai Nan swamp buffalo	Feces	China:Hainan	Female	Adult Buffalos
KCN5	Hai Nan swamp buffalo	Feces	China:Hainan	Female	Adult Buffalos
KCN6	Hai Nan swamp buffalo	Feces	China:Hainan	Female	Adult Buffalos
KCN7	Hai Nan swamp buffalo	Feces	China:Hainan	Female	Adult Buffalos
KCN8	Hai Nan swamp buffalo	Feces	China:Hainan	Female	Adult Buffalos
KCN14	Hai Nan swamp buffalo	Feces	China:Hainan	Female	Adult Buffalos
KCN27	Hai Nan swamp buffalo	Feces	China:Hainan	Female	Adult Buffalos
KCN9	Hai Nan swamp buffalo	Feces	China:Hainan	Female	Adult Buffalos
M1	Italy river buffalo	Feces	China:Hubei	Female	Adult Buffalos
M2	Italy river buffalo	Feces	China:Hubei	Male	Adult Buffalos
M3	Italy river buffalo	Feces	China:Hubei	Male	Adult Buffalos
M5	Italy river buffalo	Feces	China:Hubei	Male	Adult Buffalos
M6	Italy river buffalo	Feces	China:Hubei	Female	Adult Buffalos
M7	Italy river buffalo	Feces	China:Hubei	Female	Adult Buffalos
M8	Italy river buffalo	Feces	China:Hubei	Female	Adult Buffalos
M9	Italy river buffalo	Feces	China:Hubei	Male	Adult Buffalos
M10	Italy river buffalo	Feces	China:Hubei	Male	Adult Buffalos
M11	Italy river buffalo	Feces	China:Hubei	Female	Adult Buffalos
M12	Italy river buffalo	Feces	China:Hubei	Female	Adult Buffalos
M14	Italy river buffalo	Feces	China:Hubei	Male	Adult Buffalos
M15	Italy river buffalo	Feces	China:Hubei	Female	Adult Buffalos
M16	Italy river buffalo	Feces	China:Hubei	Male	Adult Buffalos
M18	Italy river buffalo	Feces	China:Hubei	Female	Adult Buffalos
GFL1	Guang Xi swamp buffalo	Rumen	China:Guangxi	Female	Adult Buffalos
NL10	Guang Xi swamp buffalo	Rumen	China:Guangxi	Female	Adult Buffalos
NL12	Guang Xi swamp buffalo	Rumen	China:Guangxi	Female	Adult Buffalos
NL13	Guang Xi swamp buffalo	Rumen	China:Guangxi	Female	Adult Buffalos
NL15	Guang Xi swamp buffalo	Rumen	China:Guangxi	Female	Adult Buffalos
NL16	Guang Xi swamp buffalo	Rumen	China:Guangxi	Female	Adult Buffalos
NL17	Guang Xi swamp buffalo	Rumen	China:Guangxi	Female	Adult Buffalos
NL18	Guang Xi swamp buffalo	Rumen	China:Guangxi	Female	Adult Buffalos
NL19	Guang Xi swamp buffalo	Rumen	China:Guangxi	Female	Adult Buffalos
NL21	Guang Xi swamp buffalo	Rumen	China:Guangxi	Female	Adult Buffalos
NL22	Guang Xi swamp buffalo	Rumen	China:Guangxi	Female	Adult Buffalos
NL24	Guang Xi swamp buffalo	Rumen	China:Guangxi	Female	Adult Buffalos
NL25	Guang Xi swamp buffalo	Rumen	China:Guangxi	Female	Adult Buffalos
NL26	Guang Xi swamp buffalo	Rumen	China:Guangxi	Female	Adult Buffalos
NL27	Guang Xi swamp buffalo	Rumen	China:Guangxi	Female	Adult Buffalos
NL28	Guang Xi swamp buffalo	Rumen	China:Guangxi	Female	Adult Buffalos
NL29	Guang Xi swamp buffalo	Rumen	China:Guangxi	Female	Adult Buffalos
NL31	Guang Xi swamp buffalo	Rumen	China:Guangxi	Female	Adult Buffalos
NL32	Guang Xi swamp buffalo	Rumen	China:Guangxi	Female	Adult Buffalos
NL33	Guang Xi swamp buffalo	Rumen	China:Guangxi	Female	Adult Buffalos
NL14	Guang Xi swamp buffalo	Rumen	China:Guangxi	Female	Adult Buffalos
NL2	Guang Xi swamp buffalo	Rumen	China:Guangxi	Female	Adult Buffalos
NL3	Guang Xi swamp buffalo	Rumen	China:Guangxi	Female	Adult Buffalos
NL35	Guang Xi swamp buffalo	Rumen	China:Guangxi	Female	Adult Buffalos
NL4	Guang Xi swamp buffalo	Rumen	China:Guangxi	Female	Adult Buffalos
NL5	Guang Xi swamp buffalo	Rumen	China:Guangxi	Female	Adult Buffalos
NL7	Guang Xi swamp buffalo	Rumen	China:Guangxi	Female	Adult Buffalos
NL1	Guang Xi swamp buffalo	Rumen	China:Guangxi	Female	Adult Buffalos
NL34	Guang Xi swamp buffalo	Rumen	China:Guangxi	Female	Adult Buffalos
NL8	Guang Xi swamp buffalo	Rumen	China:Guangxi	Female	Adult Buffalos
NL9	Guang Xi swamp buffalo	Rumen	China:Guangxi	Female	Adult Buffalos
S-1_BDME192032754-1a	Murrah buffalo	Rumen	China:Guangxi	Female	Adult Buffalos
S-2_BDME192032755-1a	Murrah buffalo	Rumen	China:Guangxi	Female	Adult Buffalos
S-3_BDME192032756-1a	Murrah buffalo	Rumen	China:Guangxi	Female	Adult Buffalos
S-4_BDME192032757-1a	Murrah buffalo	Rumen	China:Guangxi	Female	Adult Buffalos
S-5_BDME192032758-1a	Murrah buffalo	Rumen	China:Guangxi	Female	Adult Buffalos
S-6_BDME192032759-1a	hybrid buffalo	Rumen	China:Guangxi	Female	Adult Buffalos
S-7_BDME192032760-1a	Murrah buffalo	Rumen	China:Guangxi	Female	Adult Buffalos
S-8_BDME192032761-1a	hybrid buffalo	Rumen	China:Guangxi	Female	Adult Buffalos
S-9_BDME192032762-1a	Nili-Ravi buffalo breeding stock	Rumen	China:Guangxi	Female	Adult Buffalos
S-11_BDME192032764-1a	Nili-Ravi buffalo breeding stock	Rumen	China:Guangxi	Female	Adult Buffalos
S-12_BDME192032765-1a	Nili-Ravi buffalo breeding stock	Rumen	China:Guangxi	Female	Adult Buffalos
S-13_BDME192032766-1a	Nili-Ravi buffalo breeding stock	Rumen	China:Guangxi	Female	Adult Buffalos
S-14_BDME192032767-1a	Nili-Ravi buffalo breeding stock	Rumen	China:Guangxi	Female	Adult Buffalos
S-15_BDME192032768-1a	hybrid buffalo	Rumen	China:Guangxi	Female	Adult Buffalos
S-16_BDME192032769-1a	hybrid buffalo	Rumen	China:Guangxi	Female	Adult Buffalos
S-17_BDME192032770-1a	hybrid buffalo	Rumen	China:Guangxi	Female	Adult Buffalos
S-18_BDME192032771-1a	Mediterranean Buffalo	Rumen	China:Guangxi	Female	Adult Buffalos
S-19_BDME192032772-1a	hybrid buffalo	Rumen	China:Guangxi	Female	Adult Buffalos
S-20_BDME192032773-1a	hybrid buffalo	Rumen	China:Guangxi	Female	Adult Buffalos
S-21_BDME192032774-1a	hybrid buffalo	Rumen	China:Guangxi	Female	Adult Buffalos
S-22_BDME192032775-1a	hybrid buffalo	Rumen	China:Guangxi	Female	Adult Buffalos
S-23_BDME192032776-1a	hybrid buffalo	Rumen	China:Guangxi	Female	Adult Buffalos
S-24_BDME192032777-1a	Murrah buffalo	Rumen	China:Guangxi	Female	Adult Buffalos
S-25_BDME192032778-1a	hybrid buffalo	Rumen	China:Guangxi	Female	Adult Buffalos
S-26_BDME192032779-1a	Murrah buffalo	Rumen	China:Guangxi	Female	Adult Buffalos
S-27_BDME192032780-1a	Murrah buffalo	Rumen	China:Guangxi	Female	Adult Buffalos
S-28_BDME192032781-1a	Murrah buffalo	Rumen	China:Guangxi	Female	Adult Buffalos
S-29_BDME192032782-1a	hybrid buffalo	Rumen	China:Guangxi	Female	Adult Buffalos
S-30_BDME192032783-1a	hybrid buffalo	Rumen	China:Guangxi	Female	Adult Buffalos
S-31_BDME192032784-1a	hybrid buffalo	Rumen	China:Guangxi	Female	Adult Buffalos
S-32_BDME192032785-1a	hybrid buffalo	Rumen	China:Guangxi	Female	Adult Buffalos
S-33_BDME192032786-1a	hybrid buffalo	Rumen	China:Guangxi	Female	Adult Buffalos
S-34_BDME192032787-1a	hybrid buffalo	Rumen	China:Guangxi	Female	Adult Buffalos
S-36_BDME192032788-1a	hybrid buffalo	Rumen	China:Guangxi	Female	Adult Buffalos
S-37_BDME192032789-1a	hybrid buffalo	Rumen	China:Guangxi	Female	Adult Buffalos
S-38_BDME192032790-1a	hybrid buffalo	Rumen	China:Guangxi	Female	Adult Buffalos
S-39_BDME192032791-1a	hybrid buffalo	Rumen	China:Guangxi	Female	Adult Buffalos
S-40_BDME192032792-1a	hybrid buffalo	Rumen	China:Guangxi	Female	Adult Buffalos
S-41_BDME192032793-1a	hybrid buffalo	Rumen	China:Guangxi	Female	Adult Buffalos
S-42_BDME192032794-1a	hybrid buffalo	Rumen	China:Guangxi	Female	Adult Buffalos
S-43_BDME192032795-1a	hybrid buffalo	Rumen	China:Guangxi	Female	Adult Buffalos
S-44_BDME192032796-1a	hybrid buffalo	Rumen	China:Guangxi	Female	Adult Buffalos
S-45_BDME192032797-1a	hybrid buffalo	Rumen	China:Guangxi	Female	Adult Buffalos
S-46_BDME192032798-1a	hybrid buffalo	Rumen	China:Guangxi	Female	Adult Buffalos
S-47_BDME192032799-1a	hybrid buffalo	Rumen	China:Guangxi	Female	Adult Buffalos
S-48_BDME192032800-1a	hybrid buffalo	Rumen	China:Guangxi	Female	Adult Buffalos
S-49_BDME192032801-1a	hybrid buffalo	Rumen	China:Guangxi	Female	Adult Buffalos
S-50_BDME192032802-1a	hybrid buffalo	Rumen	China:Guangxi	Female	Adult Buffalos
S-51_BDME192032803-1a	hybrid buffalo	Rumen	China:Guangxi	Female	Adult Buffalos
S-52_BDME192032804-1a	hybrid buffalo	Rumen	China:Guangxi	Female	Adult Buffalos
S-53_BDME192032805-1a	hybrid buffalo	Rumen	China:Guangxi	Female	Adult Buffalos
S-54_BDME192032806-1a	hybrid buffalo	Rumen	China:Guangxi	Female	Adult Buffalos
S-55_BDME192032807-1a	hybrid buffalo	Rumen	China:Guangxi	Female	Adult Buffalos
S-56_BDME192032808-1a	hybrid buffalo	Rumen	China:Guangxi	Female	Adult Buffalos
S-57_BDME192032809-1a	hybrid buffalo	Rumen	China:Guangxi	Female	Adult Buffalos
S-58_BDME192032810-1a	hybrid buffalo	Rumen	China:Guangxi	Female	Adult Buffalos
S-59_BDME192032811-1a	hybrid buffalo	Rumen	China:Guangxi	Female	Adult Buffalos
S-60_BDME192032812-1a	hybrid buffalo	Rumen	China:Guangxi	Female	Adult Buffalos
S-61_BDME192032813-1a	hybrid buffalo	Rumen	China:Guangxi	Female	Adult Buffalos
S-62_BDME192032814-1a	hybrid buffalo	Rumen	China:Guangxi	Female	Adult Buffalos
S-63_BDME192032815-1a	hybrid buffalo	Rumen	China:Guangxi	Female	Adult Buffalos
S-64_BDME192032816-1a	hybrid buffalo	Rumen	China:Guangxi	Female	Adult Buffalos
S-11-071_FDME192071055-1a	hybrid buffalo	Rumen	China:Guangxi	Female	Calf
S-17-0037_FDME192071048-1a	hybrid buffalo	Rumen	China:Guangxi	Male	Calf
S-18-0084_FDME192071051-1a	hybrid buffalo	Rumen	China:Guangxi	Female	Calf
S-19-0086_FDME192071060-1a	hybrid buffalo	Rumen	China:Guangxi	Male	Calf
S-1_FDME192071053-1a	hybrid buffalo	Rumen	China:Guangxi	Female	Calf
S-20-0040_FDME192071062-1a	hybrid buffalo	Rumen	China:Guangxi	Female	Calf
S-2-0033_FDME192071052-1a	hybrid buffalo	Rumen	China:Guangxi	Female	Calf
S-21_FDME192071056-1a	hybrid buffalo	Rumen	China:Guangxi	Male	Calf
S-21_FDME192071058-1a	hybrid buffalo	Rumen	China:Guangxi	Female	Calf
S-22_FDME192071049-1a	hybrid buffalo	Rumen	China:Guangxi	Female	Calf
S-23_FDME192071050-1a	hybrid buffalo	Rumen	China:Guangxi	Male	Calf
S-24-0082_FDME192071063-1a	hybrid buffalo	Rumen	China:Guangxi	Male	Calf
S-35_FDME192071059-1a	hybrid buffalo	Rumen	China:Guangxi	Male	Calf
S-4_FDME192071061-1a	hybrid buffalo	Rumen	China:Guangxi	Female	Calf
S-5-0083_FDME192071057-1a	hybrid buffalo	Rumen	China:Guangxi	Female	Calf
S-7-0038_FDME192071054-1a	hybrid buffalo	Rumen	China:Guangxi	Male	Calf
S-8-0036_FDME192071065-1a	hybrid buffalo	Rumen	China:Guangxi	Male	Calf
S-9-0039_FDME192071066-1a	hybrid buffalo	Rumen	China:Guangxi	Female	Calf
S-24_FDME192071042-1a	hybrid buffalo	Rumen	China:Guangxi	Female	Calf
S-25_FDME192071039-1a	hybrid buffalo	Rumen	China:Guangxi	Female	Calf
S-26_FDME192071045-1a	hybrid buffalo	Rumen	China:Guangxi	Female	Calf
S-28_FDME192071034-1a	hybrid buffalo	Rumen	China:Guangxi	Male	Calf
S-29_FDME192071030-1a	hybrid buffalo	Rumen	China:Guangxi	Female	Calf
S-509_FDME192071031-1a	hybrid buffalo	Rumen	China:Guangxi	Female	Calf
S-511_FDME192071032-1a	hybrid buffalo	Rumen	China:Guangxi	Male	Calf
S-515_FDME192071036-1a	hybrid buffalo	Rumen	China:Guangxi	Female	Calf
S-516_FDME192071037-1a	hybrid buffalo	Rumen	China:Guangxi	Male	Calf
S-517_FDME192071046-1a	hybrid buffalo	Rumen	China:Guangxi	Female	Calf
S-518_FDME192071038-1a	hybrid buffalo	Rumen	China:Guangxi	Male	Calf
S-519_FDME192071040-1a	hybrid buffalo	Rumen	China:Guangxi	Female	Calf
S-520_FDME192071044-1a	hybrid buffalo	Rumen	China:Guangxi	Female	Calf
S-521_FDME192071035-1a	hybrid buffalo	Rumen	China:Guangxi	Female	Calf
S-523_FDME192071043-1a	hybrid buffalo	Rumen	China:Guangxi	Female	Calf
S-64_FDME192071033-1a	hybrid buffalo	Rumen	China:Guangxi	Female	Calf
S-75_FDME192071041-1a	hybrid buffalo	Rumen	China:Guangxi	Male	Calf
S-97_FDME192071047-1a	hybrid buffalo	Rumen	China:Guangxi	Female	Calf
GFW1	Guang Xi swamp buffalo	Reticulum	China:Guangxi	Female	Adult Buffalos
NW10	Guang Xi swamp buffalo	Reticulum	China:Guangxi	Female	Adult Buffalos
NW12	Guang Xi swamp buffalo	Reticulum	China:Guangxi	Female	Adult Buffalos
NW13	Guang Xi swamp buffalo	Reticulum	China:Guangxi	Female	Adult Buffalos
NW15	Guang Xi swamp buffalo	Reticulum	China:Guangxi	Female	Adult Buffalos
NW16	Guang Xi swamp buffalo	Reticulum	China:Guangxi	Female	Adult Buffalos
NW19	Guang Xi swamp buffalo	Reticulum	China:Guangxi	Female	Adult Buffalos
NW21	Guang Xi swamp buffalo	Reticulum	China:Guangxi	Female	Adult Buffalos
NW24	Guang Xi swamp buffalo	Reticulum	China:Guangxi	Female	Adult Buffalos
NW25	Guang Xi swamp buffalo	Reticulum	China:Guangxi	Female	Adult Buffalos
NW26	Guang Xi swamp buffalo	Reticulum	China:Guangxi	Female	Adult Buffalos
NW27	Guang Xi swamp buffalo	Reticulum	China:Guangxi	Female	Adult Buffalos
NW28	Guang Xi swamp buffalo	Reticulum	China:Guangxi	Female	Adult Buffalos
NW29	Guang Xi swamp buffalo	Reticulum	China:Guangxi	Female	Adult Buffalos
NW31	Guang Xi swamp buffalo	Reticulum	China:Guangxi	Female	Adult Buffalos
NW32	Guang Xi swamp buffalo	Reticulum	China:Guangxi	Female	Adult Buffalos
NW33	Guang Xi swamp buffalo	Reticulum	China:Guangxi	Female	Adult Buffalos
NW6	Guang Xi swamp buffalo	Reticulum	China:Guangxi	Female	Adult Buffalos
NW18	Guang Xi swamp buffalo	Reticulum	China:Guangxi	Female	Adult Buffalos
NW2	Guang Xi swamp buffalo	Reticulum	China:Guangxi	Female	Adult Buffalos
NW3	Guang Xi swamp buffalo	Reticulum	China:Guangxi	Female	Adult Buffalos
NW35	Guang Xi swamp buffalo	Reticulum	China:Guangxi	Female	Adult Buffalos
NW4	Guang Xi swamp buffalo	Reticulum	China:Guangxi	Female	Adult Buffalos
NW5	Guang Xi swamp buffalo	Reticulum	China:Guangxi	Female	Adult Buffalos
NW7	Guang Xi swamp buffalo	Reticulum	China:Guangxi	Female	Adult Buffalos
NW8	Guang Xi swamp buffalo	Reticulum	China:Guangxi	Female	Adult Buffalos
NW30	Guang Xi swamp buffalo	Reticulum	China:Guangxi	Female	Adult Buffalos
NW34	Guang Xi swamp buffalo	Reticulum	China:Guangxi	Female	Adult Buffalos
GFB1	Guang Xi swamp buffalo	Omasum	China:Guangxi	Female	Adult Buffalos
NB15	Guang Xi swamp buffalo	Omasum	China:Guangxi	Female	Adult Buffalos
NB16	Guang Xi swamp buffalo	Omasum	China:Guangxi	Female	Adult Buffalos
NB17	Guang Xi swamp buffalo	Omasum	China:Guangxi	Female	Adult Buffalos
NB18	Guang Xi swamp buffalo	Omasum	China:Guangxi	Female	Adult Buffalos
NB19	Guang Xi swamp buffalo	Omasum	China:Guangxi	Female	Adult Buffalos
NB21	Guang Xi swamp buffalo	Omasum	China:Guangxi	Female	Adult Buffalos
NB22	Guang Xi swamp buffalo	Omasum	China:Guangxi	Female	Adult Buffalos
NB25	Guang Xi swamp buffalo	Omasum	China:Guangxi	Female	Adult Buffalos
NB26	Guang Xi swamp buffalo	Omasum	China:Guangxi	Female	Adult Buffalos
NB27	Guang Xi swamp buffalo	Omasum	China:Guangxi	Female	Adult Buffalos
NB28	Guang Xi swamp buffalo	Omasum	China:Guangxi	Female	Adult Buffalos
NB29	Guang Xi swamp buffalo	Omasum	China:Guangxi	Female	Adult Buffalos
NB30	Guang Xi swamp buffalo	Omasum	China:Guangxi	Female	Adult Buffalos
NB31	Guang Xi swamp buffalo	Omasum	China:Guangxi	Female	Adult Buffalos
NB32	Guang Xi swamp buffalo	Omasum	China:Guangxi	Female	Adult Buffalos
NB33	Guang Xi swamp buffalo	Omasum	China:Guangxi	Female	Adult Buffalos
NB34	Guang Xi swamp buffalo	Omasum	China:Guangxi	Female	Adult Buffalos
NB10	Guang Xi swamp buffalo	Omasum	China:Guangxi	Female	Adult Buffalos
NB2	Guang Xi swamp buffalo	Omasum	China:Guangxi	Female	Adult Buffalos
NB24	Guang Xi swamp buffalo	Omasum	China:Guangxi	Female	Adult Buffalos
NB3	Guang Xi swamp buffalo	Omasum	China:Guangxi	Female	Adult Buffalos
NB35	Guang Xi swamp buffalo	Omasum	China:Guangxi	Female	Adult Buffalos
NB4	Guang Xi swamp buffalo	Omasum	China:Guangxi	Female	Adult Buffalos
NB6	Guang Xi swamp buffalo	Omasum	China:Guangxi	Female	Adult Buffalos
NB1	Guang Xi swamp buffalo	Omasum	China:Guangxi	Female	Adult Buffalos
NB13	Guang Xi swamp buffalo	Omasum	China:Guangxi	Female	Adult Buffalos
NB14	Guang Xi swamp buffalo	Omasum	China:Guangxi	Female	Adult Buffalos
NB5	Guang Xi swamp buffalo	Omasum	China:Guangxi	Female	Adult Buffalos
NB7	Guang Xi swamp buffalo	Omasum	China:Guangxi	Female	Adult Buffalos
NB8	Guang Xi swamp buffalo	Omasum	China:Guangxi	Female	Adult Buffalos
NB9	Guang Xi swamp buffalo	Omasum	China:Guangxi	Female	Adult Buffalos
NZ15	Guang Xi swamp buffalo	Abomasum	China:Guangxi	Female	Adult Buffalos
NZ18	Guang Xi swamp buffalo	Abomasum	China:Guangxi	Female	Adult Buffalos
NZ21	Guang Xi swamp buffalo	Abomasum	China:Guangxi	Female	Adult Buffalos
NZ25	Guang Xi swamp buffalo	Abomasum	China:Guangxi	Female	Adult Buffalos
NZ27	Guang Xi swamp buffalo	Abomasum	China:Guangxi	Female	Adult Buffalos
NZ10	Guang Xi swamp buffalo	Abomasum	China:Guangxi	Female	Adult Buffalos
NZ22	Guang Xi swamp buffalo	Abomasum	China:Guangxi	Female	Adult Buffalos
NZ33	Guang Xi swamp buffalo	Abomasum	China:Guangxi	Female	Adult Buffalos
NZ1	Guang Xi swamp buffalo	Abomasum	China:Guangxi	Female	Adult Buffalos
NZ11	Guang Xi swamp buffalo	Abomasum	China:Guangxi	Female	Adult Buffalos
NZ16	Guang Xi swamp buffalo	Abomasum	China:Guangxi	Female	Adult Buffalos
NZ2	Guang Xi swamp buffalo	Abomasum	China:Guangxi	Female	Adult Buffalos
NZ24	Guang Xi swamp buffalo	Abomasum	China:Guangxi	Female	Adult Buffalos
NZ26	Guang Xi swamp buffalo	Abomasum	China:Guangxi	Female	Adult Buffalos
NZ29	Guang Xi swamp buffalo	Abomasum	China:Guangxi	Female	Adult Buffalos
NZ3	Guang Xi swamp buffalo	Abomasum	China:Guangxi	Female	Adult Buffalos
NZ32	Guang Xi swamp buffalo	Abomasum	China:Guangxi	Female	Adult Buffalos
NZ35	Guang Xi swamp buffalo	Abomasum	China:Guangxi	Female	Adult Buffalos
NZ4	Guang Xi swamp buffalo	Abomasum	China:Guangxi	Female	Adult Buffalos
NZ5	Guang Xi swamp buffalo	Abomasum	China:Guangxi	Female	Adult Buffalos
NZ6	Guang Xi swamp buffalo	Abomasum	China:Guangxi	Female	Adult Buffalos
NZ7	Guang Xi swamp buffalo	Abomasum	China:Guangxi	Female	Adult Buffalos
NM15	Guang Xi swamp buffalo	Cecum	China:Guangxi	Female	Adult Buffalos
NM17	Guang Xi swamp buffalo	Cecum	China:Guangxi	Female	Adult Buffalos
NM18	Guang Xi swamp buffalo	Cecum	China:Guangxi	Female	Adult Buffalos
NM19	Guang Xi swamp buffalo	Cecum	China:Guangxi	Female	Adult Buffalos
NM27	Guang Xi swamp buffalo	Cecum	China:Guangxi	Female	Adult Buffalos
NM33	Guang Xi swamp buffalo	Cecum	China:Guangxi	Female	Adult Buffalos
NM14	Guang Xi swamp buffalo	Cecum	China:Guangxi	Female	Adult Buffalos
NM16	Guang Xi swamp buffalo	Cecum	China:Guangxi	Female	Adult Buffalos
NM2	Guang Xi swamp buffalo	Cecum	China:Guangxi	Female	Adult Buffalos
NM21	Guang Xi swamp buffalo	Cecum	China:Guangxi	Female	Adult Buffalos
NM22	Guang Xi swamp buffalo	Cecum	China:Guangxi	Female	Adult Buffalos
NM24	Guang Xi swamp buffalo	Cecum	China:Guangxi	Female	Adult Buffalos
NM25	Guang Xi swamp buffalo	Cecum	China:Guangxi	Female	Adult Buffalos
NM26	Guang Xi swamp buffalo	Cecum	China:Guangxi	Female	Adult Buffalos
NM28	Guang Xi swamp buffalo	Cecum	China:Guangxi	Female	Adult Buffalos
NM29	Guang Xi swamp buffalo	Cecum	China:Guangxi	Female	Adult Buffalos
NM3	Guang Xi swamp buffalo	Cecum	China:Guangxi	Female	Adult Buffalos
NM30	Guang Xi swamp buffalo	Cecum	China:Guangxi	Female	Adult Buffalos
NM31	Guang Xi swamp buffalo	Cecum	China:Guangxi	Female	Adult Buffalos
NM32	Guang Xi swamp buffalo	Cecum	China:Guangxi	Female	Adult Buffalos
NM34	Guang Xi swamp buffalo	Cecum	China:Guangxi	Female	Adult Buffalos
NM35	Guang Xi swamp buffalo	Cecum	China:Guangxi	Female	Adult Buffalos
NM4	Guang Xi swamp buffalo	Cecum	China:Guangxi	Female	Adult Buffalos
NM5	Guang Xi swamp buffalo	Cecum	China:Guangxi	Female	Adult Buffalos
NM6	Guang Xi swamp buffalo	Cecum	China:Guangxi	Female	Adult Buffalos
NM8	Guang Xi swamp buffalo	Cecum	China:Guangxi	Female	Adult Buffalos
NM9	Guang Xi swamp buffalo	Cecum	China:Guangxi	Female	Adult Buffalos
NM1	Guang Xi swamp buffalo	Cecum	China:Guangxi	Female	Adult Buffalos
NM10	Guang Xi swamp buffalo	Cecum	China:Guangxi	Female	Adult Buffalos
NM12	Guang Xi swamp buffalo	Cecum	China:Guangxi	Female	Adult Buffalos
NM7	Guang Xi swamp buffalo	Cecum	China:Guangxi	Female	Adult Buffalos
NJ15	Guang Xi swamp buffalo	Colon	China:Guangxi	Female	Adult Buffalos
NJ17	Guang Xi swamp buffalo	Colon	China:Guangxi	Female	Adult Buffalos
NJ18	Guang Xi swamp buffalo	Colon	China:Guangxi	Female	Adult Buffalos
NJ19	Guang Xi swamp buffalo	Colon	China:Guangxi	Female	Adult Buffalos
NJ22	Guang Xi swamp buffalo	Colon	China:Guangxi	Female	Adult Buffalos
NJ25	Guang Xi swamp buffalo	Colon	China:Guangxi	Female	Adult Buffalos
NJ27	Guang Xi swamp buffalo	Colon	China:Guangxi	Female	Adult Buffalos
NJ33	Guang Xi swamp buffalo	Colon	China:Guangxi	Female	Adult Buffalos
NJ1	Guang Xi swamp buffalo	Colon	China:Guangxi	Female	Adult Buffalos
NJ11	Guang Xi swamp buffalo	Colon	China:Guangxi	Female	Adult Buffalos
NJ12	Guang Xi swamp buffalo	Colon	China:Guangxi	Female	Adult Buffalos
NJ14	Guang Xi swamp buffalo	Colon	China:Guangxi	Female	Adult Buffalos
NJ16	Guang Xi swamp buffalo	Colon	China:Guangxi	Female	Adult Buffalos
NJ2	Guang Xi swamp buffalo	Colon	China:Guangxi	Female	Adult Buffalos
NJ21	Guang Xi swamp buffalo	Colon	China:Guangxi	Female	Adult Buffalos
NJ24	Guang Xi swamp buffalo	Colon	China:Guangxi	Female	Adult Buffalos
NJ26	Guang Xi swamp buffalo	Colon	China:Guangxi	Female	Adult Buffalos
NJ28	Guang Xi swamp buffalo	Colon	China:Guangxi	Female	Adult Buffalos
NJ29	Guang Xi swamp buffalo	Colon	China:Guangxi	Female	Adult Buffalos
NJ30	Guang Xi swamp buffalo	Colon	China:Guangxi	Female	Adult Buffalos
NJ31	Guang Xi swamp buffalo	Colon	China:Guangxi	Female	Adult Buffalos
NJ32	Guang Xi swamp buffalo	Colon	China:Guangxi	Female	Adult Buffalos
NJ34	Guang Xi swamp buffalo	Colon	China:Guangxi	Female	Adult Buffalos
NJ35	Guang Xi swamp buffalo	Colon	China:Guangxi	Female	Adult Buffalos
NJ6	Guang Xi swamp buffalo	Colon	China:Guangxi	Female	Adult Buffalos
NJ9	Guang Xi swamp buffalo	Colon	China:Guangxi	Female	Adult Buffalos
NJ13	Guang Xi swamp buffalo	Colon	China:Guangxi	Female	Adult Buffalos
NJ4	Guang Xi swamp buffalo	Colon	China:Guangxi	Female	Adult Buffalos
NJ5	Guang Xi swamp buffalo	Colon	China:Guangxi	Female	Adult Buffalos
NJ7	Guang Xi swamp buffalo	Colon	China:Guangxi	Female	Adult Buffalos
NK15	Guang Xi swamp buffalo	Jejunum	China:Guangxi	Female	Adult Buffalos
NK30	Guang Xi swamp buffalo	Jejunum	China:Guangxi	Female	Adult Buffalos
NK33	Guang Xi swamp buffalo	Jejunum	China:Guangxi	Female	Adult Buffalos
NK1	Guang Xi swamp buffalo	Jejunum	China:Guangxi	Female	Adult Buffalos
NK13	Guang Xi swamp buffalo	Jejunum	China:Guangxi	Female	Adult Buffalos
NK17	Guang Xi swamp buffalo	Jejunum	China:Guangxi	Female	Adult Buffalos
NK21	Guang Xi swamp buffalo	Jejunum	China:Guangxi	Female	Adult Buffalos
NK22	Guang Xi swamp buffalo	Jejunum	China:Guangxi	Female	Adult Buffalos
NK26	Guang Xi swamp buffalo	Jejunum	China:Guangxi	Female	Adult Buffalos
NK29	Guang Xi swamp buffalo	Jejunum	China:Guangxi	Female	Adult Buffalos
NK3	Guang Xi swamp buffalo	Jejunum	China:Guangxi	Female	Adult Buffalos
NK32	Guang Xi swamp buffalo	Jejunum	China:Guangxi	Female	Adult Buffalos
NK34	Guang Xi swamp buffalo	Jejunum	China:Guangxi	Female	Adult Buffalos
NK35	Guang Xi swamp buffalo	Jejunum	China:Guangxi	Female	Adult Buffalos
NK4	Guang Xi swamp buffalo	Jejunum	China:Guangxi	Female	Adult Buffalos
NK6	Guang Xi swamp buffalo	Jejunum	China:Guangxi	Female	Adult Buffalos
NK10	Guang Xi swamp buffalo	Jejunum	China:Guangxi	Female	Adult Buffalos
NK11	Guang Xi swamp buffalo	Jejunum	China:Guangxi	Female	Adult Buffalos
NK12	Guang Xi swamp buffalo	Jejunum	China:Guangxi	Female	Adult Buffalos
NK18	Guang Xi swamp buffalo	Jejunum	China:Guangxi	Female	Adult Buffalos
NK2	Guang Xi swamp buffalo	Jejunum	China:Guangxi	Female	Adult Buffalos
NK5	Guang Xi swamp buffalo	Jejunum	China:Guangxi	Female	Adult Buffalos
NK7	Guang Xi swamp buffalo	Jejunum	China:Guangxi	Female	Adult Buffalos
NK9	Guang Xi swamp buffalo	Jejunum	China:Guangxi	Female	Adult Buffalos

## Sheet: Supplementary Table 2
Number of samples of different breeds
Breed		Sample number
River buffalo	Mediterranean Buffalo	55
	Guangxi river buffalo	12
	Nili-Ravi buffalo breeding stock	18
	Murrah buffalo	22
	Penang river buffalo	31
	Italy river buffalo	15
Swamp buffalo	Guangxi swamp buffalo	252
	Xinyang swamp buffalo	41
	Anhui swamp buffalo	44
	Myanmar swamp buffalo	31
	De Hong swamp buffalo	31
	Hainan swamp buffalo	31
Hybrid buffalo	——	112

## Sheet: Supplementary Table 3
Number of samples from different sources
Source		Sample number
Contents	Rumen	129
	Reticulum	28
	Omasum	32
	Abomasum	22
	Jejunum	24
	Cecum	31
	Colon	30
Feces	Rectum	399

## Sheet: Supplementary Table 4
Number of samples in different sampling areas
Location		Sample number
China	Guangxi	471
	Henan	41
	Anhui	44
	Yunnan	93
	Hainan	31
	Hubei	15

## Sheet: Supplementary Table 5
Number of samples by sex
Sex	Sample number
Female	635
Male	60

## Sheet: Supplementary Table 6
Number of samples at different growth phases
Growth phases	Sample number
Adult Buffalos	659
Calf	36

## Sheet: Supplementary Table 7
bioproject_accession	biosample_accession	library_ID	title	library_strategy	library_source	library_selection	library_layout	platform	instrument_model	design_description	filetype	filename	filename2
PRJNA656389	SAMN15870874	FGD10_S137_L002	Bubalus bubalis digestive tract metagenome	WGS	METAGENOMIC	PCR	paired	ILLUMINA	Illumina NovaSeq 6000	Whole metagenomic sequencing	fastq	FGD10_S137_L002_R1_001.fastq.gz	FGD10_S137_L002_R2_001.fastq.gz
PRJNA656389	SAMN15870875	FGD11_S138_L002	Bubalus bubalis digestive tract metagenome	WGS	METAGENOMIC	PCR	paired	ILLUMINA	Illumina NovaSeq 6000	Whole metagenomic sequencing	fastq	FGD11_S138_L002_R1_001.fastq.gz	FGD11_S138_L002_R2_001.fastq.gz
PRJNA656389	SAMN15870876	FGD12_S139_L002	Bubalus bubalis digestive tract metagenome	WGS	METAGENOMIC	PCR	paired	ILLUMINA	Illumina NovaSeq 6000	Whole metagenomic sequencing	fastq	FGD12_S139_L002_R1_001.fastq.gz	FGD12_S139_L002_R2_001.fastq.gz
PRJNA656389	SAMN15870877	FGD13_S140_L002	Bubalus bubalis digestive tract metagenome	WGS	METAGENOMIC	PCR	paired	ILLUMINA	Illumina NovaSeq 6000	Whole metagenomic sequencing	fastq	FGD13_S140_L002_R1_001.fastq.gz	FGD13_S140_L002_R2_001.fastq.gz
PRJNA656389	SAMN15870878	FGD14_S141_L002	Bubalus bubalis digestive tract metagenome	WGS	METAGENOMIC	PCR	paired	ILLUMINA	Illumina NovaSeq 6000	Whole metagenomic sequencing	fastq	FGD14_S141_L002_R1_001.fastq.gz	FGD14_S141_L002_R2_001.fastq.gz
PRJNA656389	SAMN15870879	FGD1_S1_L003	Bubalus bubalis digestive tract metagenome	WGS	METAGENOMIC	PCR	paired	ILLUMINA	Illumina NovaSeq 6000	Whole metagenomic sequencing	fastq	FGD1_S1_L003_R1_001.fastq.gz	FGD1_S1_L003_R2_001.fastq.gz
PRJNA656389	SAMN15870880	FGD2_S2_L003	Bubalus bubalis digestive tract metagenome	WGS	METAGENOMIC	PCR	paired	ILLUMINA	Illumina NovaSeq 6000	Whole metagenomic sequencing	fastq	FGD2_S2_L003_R1_001.fastq.gz	FGD2_S2_L003_R2_001.fastq.gz
PRJNA656389	SAMN15870881	FGD3_S3_L003	Bubalus bubalis digestive tract metagenome	WGS	METAGENOMIC	PCR	paired	ILLUMINA	Illumina NovaSeq 6000	Whole metagenomic sequencing	fastq	FGD3_S3_L003_R1_001.fastq.gz	FGD3_S3_L003_R2_001.fastq.gz
PRJNA656389	SAMN15870882	FGD4_S4_L003	Bubalus bubalis digestive tract metagenome	WGS	METAGENOMIC	PCR	paired	ILLUMINA	Illumina NovaSeq 6000	Whole metagenomic sequencing	fastq	FGD4_S4_L003_R1_001.fastq.gz	FGD4_S4_L003_R2_001.fastq.gz
PRJNA656389	SAMN15870883	FGD5_S5_L003	Bubalus bubalis digestive tract metagenome	WGS	METAGENOMIC	PCR	paired	ILLUMINA	Illumina NovaSeq 6000	Whole metagenomic sequencing	fastq	FGD5_S5_L003_R1_001.fastq.gz	FGD5_S5_L003_R2_001.fastq.gz
PRJNA656389	SAMN15870884	FGD6_S6_L003	Bubalus bubalis digestive tract metagenome	WGS	METAGENOMIC	PCR	paired	ILLUMINA	Illumina NovaSeq 6000	Whole metagenomic sequencing	fastq	FGD6_S6_L003_R1_001.fastq.gz	FGD6_S6_L003_R2_001.fastq.gz
PRJNA656389	SAMN15870885	FGD7_S7_L003	Bubalus bubalis digestive tract metagenome	WGS	METAGENOMIC	PCR	paired	ILLUMINA	Illumina NovaSeq 6000	Whole metagenomic sequencing	fastq	FGD7_S7_L003_R1_001.fastq.gz	FGD7_S7_L003_R2_001.fastq.gz
PRJNA656389	SAMN15870886	FGD8_S8_L003	Bubalus bubalis digestive tract metagenome	WGS	METAGENOMIC	PCR	paired	ILLUMINA	Illumina NovaSeq 6000	Whole metagenomic sequencing	fastq	FGD8_S8_L003_R1_001.fastq.gz	FGD8_S8_L003_R2_001.fastq.gz
PRJNA656389	SAMN15870887	FGD9_S9_L003	Bubalus bubalis digestive tract metagenome	WGS	METAGENOMIC	PCR	paired	ILLUMINA	Illumina NovaSeq 6000	Whole metagenomic sequencing	fastq	FGD9_S9_L003_R1_001.fastq.gz	FGD9_S9_L003_R2_001.fastq.gz
PRJNA656389	SAMN15870888	MGD10_S151_L002	Bubalus bubalis digestive tract metagenome	WGS	METAGENOMIC	PCR	paired	ILLUMINA	Illumina NovaSeq 6000	Whole metagenomic sequencing	fastq	MGD10_S151_L002_R1_001.fastq.gz	MGD10_S151_L002_R2_001.fastq.gz
PRJNA656389	SAMN15870889	MGD11_S152_L002	Bubalus bubalis digestive tract metagenome	WGS	METAGENOMIC	PCR	paired	ILLUMINA	Illumina NovaSeq 6000	Whole metagenomic sequencing	fastq	MGD11_S152_L002_R1_001.fastq.gz	MGD11_S152_L002_R2_001.fastq.gz
PRJNA656389	SAMN15870890	MGD12_S153_L002	Bubalus bubalis digestive tract metagenome	WGS	METAGENOMIC	PCR	paired	ILLUMINA	Illumina NovaSeq 6000	Whole metagenomic sequencing	fastq	MGD12_S153_L002_R1_001.fastq.gz	MGD12_S153_L002_R2_001.fastq.gz
PRJNA656389	SAMN15870891	MGD1_S142_L002	Bubalus bubalis digestive tract metagenome	WGS	METAGENOMIC	PCR	paired	ILLUMINA	Illumina NovaSeq 6000	Whole metagenomic sequencing	fastq	MGD1_S142_L002_R1_001.fastq.gz	MGD1_S142_L002_R2_001.fastq.gz
PRJNA656389	SAMN15870892	MGD2_S143_L002	Bubalus bubalis digestive tract metagenome	WGS	METAGENOMIC	PCR	paired	ILLUMINA	Illumina NovaSeq 6000	Whole metagenomic sequencing	fastq	MGD2_S143_L002_R1_001.fastq.gz	MGD2_S143_L002_R2_001.fastq.gz
PRJNA656389	SAMN15870893	MGD3_S144_L002	Bubalus bubalis digestive tract metagenome	WGS	METAGENOMIC	PCR	paired	ILLUMINA	Illumina NovaSeq 6000	Whole metagenomic sequencing	fastq	MGD3_S144_L002_R1_001.fastq.gz	MGD3_S144_L002_R2_001.fastq.gz
PRJNA656389	SAMN15870894	MGD4_S145_L002	Bubalus bubalis digestive tract metagenome	WGS	METAGENOMIC	PCR	paired	ILLUMINA	Illumina NovaSeq 6000	Whole metagenomic sequencing	fastq	MGD4_S145_L002_R1_001.fastq.gz	MGD4_S145_L002_R2_001.fastq.gz
PRJNA656389	SAMN15870895	MGD5_S146_L002	Bubalus bubalis digestive tract metagenome	WGS	METAGENOMIC	PCR	paired	ILLUMINA	Illumina NovaSeq 6000	Whole metagenomic sequencing	fastq	MGD5_S146_L002_R1_001.fastq.gz	MGD5_S146_L002_R2_001.fastq.gz
PRJNA656389	SAMN15870896	MGD6_S147_L002	Bubalus bubalis digestive tract metagenome	WGS	METAGENOMIC	PCR	paired	ILLUMINA	Illumina NovaSeq 6000	Whole metagenomic sequencing	fastq	MGD6_S147_L002_R1_001.fastq.gz	MGD6_S147_L002_R2_001.fastq.gz
PRJNA656389	SAMN15870897	MGD7_S148_L002	Bubalus bubalis digestive tract metagenome	WGS	METAGENOMIC	PCR	paired	ILLUMINA	Illumina NovaSeq 6000	Whole metagenomic sequencing	fastq	MGD7_S148_L002_R1_001.fastq.gz	MGD7_S148_L002_R2_001.fastq.gz
PRJNA656389	SAMN15870898	MGD8_S149_L002	Bubalus bubalis digestive tract metagenome	WGS	METAGENOMIC	PCR	paired	ILLUMINA	Illumina NovaSeq 6000	Whole metagenomic sequencing	fastq	MGD8_S149_L002_R1_001.fastq.gz	MGD8_S149_L002_R2_001.fastq.gz
PRJNA656389	SAMN15870899	MGD9_S150_L002	Bubalus bubalis digestive tract metagenome	WGS	METAGENOMIC	PCR	paired	ILLUMINA	Illumina NovaSeq 6000	Whole metagenomic sequencing	fastq	MGD9_S150_L002_R1_001.fastq.gz	MGD9_S150_L002_R2_001.fastq.gz
PRJNA656389	SAMN15870900	SBCM10_S156_L002	Bubalus bubalis digestive tract metagenome	WGS	METAGENOMIC	PCR	paired	ILLUMINA	Illumina NovaSeq 6000	Whole metagenomic sequencing	fastq	SBCM10_S156_L002_R1_001.fastq.gz	SBCM10_S156_L002_R2_001.fastq.gz
PRJNA656389	SAMN15870901	SBCM11_S163_L002	Bubalus bubalis digestive tract metagenome	WGS	METAGENOMIC	PCR	paired	ILLUMINA	Illumina NovaSeq 6000	Whole metagenomic sequencing	fastq	SBCM11_S163_L002_R1_001.fastq.gz	SBCM11_S163_L002_R2_001.fastq.gz
PRJNA656389	SAMN15870902	SBCM12_S160_L002	Bubalus bubalis digestive tract metagenome	WGS	METAGENOMIC	PCR	paired	ILLUMINA	Illumina NovaSeq 6000	Whole metagenomic sequencing	fastq	SBCM12_S160_L002_R1_001.fastq.gz	SBCM12_S160_L002_R2_001.fastq.gz
PRJNA656389	SAMN15870903	SBCM13_S158_L002	Bubalus bubalis digestive tract metagenome	WGS	METAGENOMIC	PCR	paired	ILLUMINA	Illumina NovaSeq 6000	Whole metagenomic sequencing	fastq	SBCM13_S158_L002_R1_001.fastq.gz	SBCM13_S158_L002_R2_001.fastq.gz
PRJNA656389	SAMN15870904	SBCM14_S166_L002	Bubalus bubalis digestive tract metagenome	WGS	METAGENOMIC	PCR	paired	ILLUMINA	Illumina NovaSeq 6000	Whole metagenomic sequencing	fastq	SBCM14_S166_L002_R1_001.fastq.gz	SBCM14_S166_L002_R2_001.fastq.gz
PRJNA656389	SAMN15870905	SBCM1_S159_L002	Bubalus bubalis digestive tract metagenome	WGS	METAGENOMIC	PCR	paired	ILLUMINA	Illumina NovaSeq 6000	Whole metagenomic sequencing	fastq	SBCM1_S159_L002_R1_001.fastq.gz	SBCM1_S159_L002_R2_001.fastq.gz
PRJNA656389	SAMN15870906	SBCM2_S164_L002	Bubalus bubalis digestive tract metagenome	WGS	METAGENOMIC	PCR	paired	ILLUMINA	Illumina NovaSeq 6000	Whole metagenomic sequencing	fastq	SBCM2_S164_L002_R1_001.fastq.gz	SBCM2_S164_L002_R2_001.fastq.gz
PRJNA656389	SAMN15870907	SBCM3_S154_L002	Bubalus bubalis digestive tract metagenome	WGS	METAGENOMIC	PCR	paired	ILLUMINA	Illumina NovaSeq 6000	Whole metagenomic sequencing	fastq	SBCM3_S154_L002_R1_001.fastq.gz	SBCM3_S154_L002_R2_001.fastq.gz
PRJNA656389	SAMN15870908	SBCM4_S162_L002	Bubalus bubalis digestive tract metagenome	WGS	METAGENOMIC	PCR	paired	ILLUMINA	Illumina NovaSeq 6000	Whole metagenomic sequencing	fastq	SBCM4_S162_L002_R1_001.fastq.gz	SBCM4_S162_L002_R2_001.fastq.gz
PRJNA656389	SAMN15870909	SBCM5_S155_L002	Bubalus bubalis digestive tract metagenome	WGS	METAGENOMIC	PCR	paired	ILLUMINA	Illumina NovaSeq 6000	Whole metagenomic sequencing	fastq	SBCM5_S155_L002_R1_001.fastq.gz	SBCM5_S155_L002_R2_001.fastq.gz
PRJNA656389	SAMN15870910	SBCM6_S161_L002	Bubalus bubalis digestive tract metagenome	WGS	METAGENOMIC	PCR	paired	ILLUMINA	Illumina NovaSeq 6000	Whole metagenomic sequencing	fastq	SBCM6_S161_L002_R1_001.fastq.gz	SBCM6_S161_L002_R2_001.fastq.gz
PRJNA656389	SAMN15870911	SBCM7_S157_L002	Bubalus bubalis digestive tract metagenome	WGS	METAGENOMIC	PCR	paired	ILLUMINA	Illumina NovaSeq 6000	Whole metagenomic sequencing	fastq	SBCM7_S157_L002_R1_001.fastq.gz	SBCM7_S157_L002_R2_001.fastq.gz
PRJNA656389	SAMN15870912	SBCM8_S167_L002	Bubalus bubalis digestive tract metagenome	WGS	METAGENOMIC	PCR	paired	ILLUMINA	Illumina NovaSeq 6000	Whole metagenomic sequencing	fastq	SBCM8_S167_L002_R1_001.fastq.gz	SBCM8_S167_L002_R2_001.fastq.gz
PRJNA656389	SAMN15870913	SBCM9_S165_L002	Bubalus bubalis digestive tract metagenome	WGS	METAGENOMIC	PCR	paired	ILLUMINA	Illumina NovaSeq 6000	Whole metagenomic sequencing	fastq	SBCM9_S165_L002_R1_001.fastq.gz	SBCM9_S165_L002_R2_001.fastq.gz
PRJNA656389	SAMN15870914	GBCM10_S177_L002	Bubalus bubalis digestive tract metagenome	WGS	METAGENOMIC	PCR	paired	ILLUMINA	Illumina NovaSeq 6000	Whole metagenomic sequencing	fastq	GBCM10_S177_L002_R1_001.fastq.gz	GBCM10_S177_L002_R2_001.fastq.gz
PRJNA656389	SAMN15870915	GBCM11_S172_L002	Bubalus bubalis digestive tract metagenome	WGS	METAGENOMIC	PCR	paired	ILLUMINA	Illumina NovaSeq 6000	Whole metagenomic sequencing	fastq	GBCM11_S172_L002_R1_001.fastq.gz	GBCM11_S172_L002_R2_001.fastq.gz
PRJNA656389	SAMN15870916	GBCM1_S175_L002	Bubalus bubalis digestive tract metagenome	WGS	METAGENOMIC	PCR	paired	ILLUMINA	Illumina NovaSeq 6000	Whole metagenomic sequencing	fastq	GBCM1_S175_L002_R1_001.fastq.gz	GBCM1_S175_L002_R2_001.fastq.gz
PRJNA656389	SAMN15870917	GBCM2_S178_L002	Bubalus bubalis digestive tract metagenome	WGS	METAGENOMIC	PCR	paired	ILLUMINA	Illumina NovaSeq 6000	Whole metagenomic sequencing	fastq	GBCM2_S178_L002_R1_001.fastq.gz	GBCM2_S178_L002_R2_001.fastq.gz
PRJNA656389	SAMN15870918	GBCM3_S170_L002	Bubalus bubalis digestive tract metagenome	WGS	METAGENOMIC	PCR	paired	ILLUMINA	Illumina NovaSeq 6000	Whole metagenomic sequencing	fastq	GBCM3_S170_L002_R1_001.fastq.gz	GBCM3_S170_L002_R2_001.fastq.gz
PRJNA656389	SAMN15870919	GBCM4_S168_L002	Bubalus bubalis digestive tract metagenome	WGS	METAGENOMIC	PCR	paired	ILLUMINA	Illumina NovaSeq 6000	Whole metagenomic sequencing	fastq	GBCM4_S168_L002_R1_001.fastq.gz	GBCM4_S168_L002_R2_001.fastq.gz
PRJNA656389	SAMN15870920	GBCM5_S173_L002	Bubalus bubalis digestive tract metagenome	WGS	METAGENOMIC	PCR	paired	ILLUMINA	Illumina NovaSeq 6000	Whole metagenomic sequencing	fastq	GBCM5_S173_L002_R1_001.fastq.gz	GBCM5_S173_L002_R2_001.fastq.gz
PRJNA656389	SAMN15870921	GBCM6_S174_L002	Bubalus bubalis digestive tract metagenome	WGS	METAGENOMIC	PCR	paired	ILLUMINA	Illumina NovaSeq 6000	Whole metagenomic sequencing	fastq	GBCM6_S174_L002_R1_001.fastq.gz	GBCM6_S174_L002_R2_001.fastq.gz
PRJNA656389	SAMN15870922	GBCM7_S176_L002	Bubalus bubalis digestive tract metagenome	WGS	METAGENOMIC	PCR	paired	ILLUMINA	Illumina NovaSeq 6000	Whole metagenomic sequencing	fastq	GBCM7_S176_L002_R1_001.fastq.gz	GBCM7_S176_L002_R2_001.fastq.gz
PRJNA656389	SAMN15870923	GBCM8_S171_L002	Bubalus bubalis digestive tract metagenome	WGS	METAGENOMIC	PCR	paired	ILLUMINA	Illumina NovaSeq 6000	Whole metagenomic sequencing	fastq	GBCM8_S171_L002_R1_001.fastq.gz	GBCM8_S171_L002_R2_001.fastq.gz
PRJNA656389	SAMN15870924	GBCM9_S169_L002	Bubalus bubalis digestive tract metagenome	WGS	METAGENOMIC	PCR	paired	ILLUMINA	Illumina NovaSeq 6000	Whole metagenomic sequencing	fastq	GBCM9_S169_L002_R1_001.fastq.gz	GBCM9_S169_L002_R2_001.fastq.gz
PRJNA656389	SAMN15870925	GBS1_S179_L002	Bubalus bubalis digestive tract metagenome	WGS	METAGENOMIC	PCR	paired	ILLUMINA	Illumina NovaSeq 6000	Whole metagenomic sequencing	fastq	GBS1_S179_L002_R1_001.fastq.gz	GBS1_S179_L002_R2_001.fastq.gz
PRJNA656389	SAMN15870926	GBS2_S180_L002	Bubalus bubalis digestive tract metagenome	WGS	METAGENOMIC	PCR	paired	ILLUMINA	Illumina NovaSeq 6000	Whole metagenomic sequencing	fastq	GBS2_S180_L002_R1_001.fastq.gz	GBS2_S180_L002_R2_001.fastq.gz
PRJNA656389	SAMN15870927	GBS3_S181_L002	Bubalus bubalis digestive tract metagenome	WGS	METAGENOMIC	PCR	paired	ILLUMINA	Illumina NovaSeq 6000	Whole metagenomic sequencing	fastq	GBS3_S181_L002_R1_001.fastq.gz	GBS3_S181_L002_R2_001.fastq.gz
PRJNA656389	SAMN15870928	GBS4_S182_L002	Bubalus bubalis digestive tract metagenome	WGS	METAGENOMIC	PCR	paired	ILLUMINA	Illumina NovaSeq 6000	Whole metagenomic sequencing	fastq	GBS4_S182_L002_R1_001.fastq.gz	GBS4_S182_L002_R2_001.fastq.gz
PRJNA656389	SAMN15870929	HCN1	Bubalus bubalis digestive tract metagenome	WGS	METAGENOMIC	PCR	paired	ILLUMINA	Illumina NovaSeq 6000	Whole metagenomic sequencing	fastq	HCN1_R1.fq.gz	HCN1_R2.fq.gz
PRJNA656389	SAMN15870930	HCN2	Bubalus bubalis digestive tract metagenome	WGS	METAGENOMIC	PCR	paired	ILLUMINA	Illumina NovaSeq 6000	Whole metagenomic sequencing	fastq	HCN2_R1.fq.gz	HCN2_R2.fq.gz
PRJNA656389	SAMN15870931	HCN3	Bubalus bubalis digestive tract metagenome	WGS	METAGENOMIC	PCR	paired	ILLUMINA	Illumina NovaSeq 6000	Whole metagenomic sequencing	fastq	HCN3_R1.fq.gz	HCN3_R2.fq.gz
PRJNA656389	SAMN15870932	HCN4	Bubalus bubalis digestive tract metagenome	WGS	METAGENOMIC	PCR	paired	ILLUMINA	Illumina NovaSeq 6000	Whole metagenomic sequencing	fastq	HCN4_R1.fq.gz	HCN4_R2.fq.gz
PRJNA656389	SAMN15870933	HCN5	Bubalus bubalis digestive tract metagenome	WGS	METAGENOMIC	PCR	paired	ILLUMINA	Illumina NovaSeq 6000	Whole metagenomic sequencing	fastq	HCN5_R1.fq.gz	HCN5_R2.fq.gz
PRJNA656389	SAMN15870934	HCN6	Bubalus bubalis digestive tract metagenome	WGS	METAGENOMIC	PCR	paired	ILLUMINA	Illumina NovaSeq 6000	Whole metagenomic sequencing	fastq	HCN6_R1.fq.gz	HCN6_R2.fq.gz
PRJNA656389	SAMN15870935	HCN7	Bubalus bubalis digestive tract metagenome	WGS	METAGENOMIC	PCR	paired	ILLUMINA	Illumina NovaSeq 6000	Whole metagenomic sequencing	fastq	HCN7_R1.fq.gz	HCN7_R2.fq.gz
PRJNA656389	SAMN15870936	HCN8	Bubalus bubalis digestive tract metagenome	WGS	METAGENOMIC	PCR	paired	ILLUMINA	Illumina NovaSeq 6000	Whole metagenomic sequencing	fastq	HCN8_R1.fq.gz	HCN8_R2.fq.gz
PRJNA656389	SAMN15870937	HCN9	Bubalus bubalis digestive tract metagenome	WGS	METAGENOMIC	PCR	paired	ILLUMINA	Illumina NovaSeq 6000	Whole metagenomic sequencing	fastq	HCN9_R1.fq.gz	HCN9_R2.fq.gz
PRJNA656389	SAMN15870938	HCN10	Bubalus bubalis digestive tract metagenome	WGS	METAGENOMIC	PCR	paired	ILLUMINA	Illumina NovaSeq 6000	Whole metagenomic sequencing	fastq	HCN10_R1.fq.gz	HCN10_R2.fq.gz
PRJNA656389	SAMN15870939	HCN11	Bubalus bubalis digestive tract metagenome	WGS	METAGENOMIC	PCR	paired	ILLUMINA	Illumina NovaSeq 6000	Whole metagenomic sequencing	fastq	HCN11_R1.fq.gz	HCN11_R2.fq.gz
PRJNA656389	SAMN15870940	HCN12	Bubalus bubalis digestive tract metagenome	WGS	METAGENOMIC	PCR	paired	ILLUMINA	Illumina NovaSeq 6000	Whole metagenomic sequencing	fastq	HCN12_R1.fq.gz	HCN12_R2.fq.gz
PRJNA656389	SAMN15870941	HCN13	Bubalus bubalis digestive tract metagenome	WGS	METAGENOMIC	PCR	paired	ILLUMINA	Illumina NovaSeq 6000	Whole metagenomic sequencing	fastq	HCN13_R1.fq.gz	HCN13_R2.fq.gz
PRJNA656389	SAMN15870942	HCN14	Bubalus bubalis digestive tract metagenome	WGS	METAGENOMIC	PCR	paired	ILLUMINA	Illumina NovaSeq 6000	Whole metagenomic sequencing	fastq	HCN14_R1.fq.gz	HCN14_R2.fq.gz
PRJNA656389	SAMN15870943	HCN15	Bubalus bubalis digestive tract metagenome	WGS	METAGENOMIC	PCR	paired	ILLUMINA	Illumina NovaSeq 6000	Whole metagenomic sequencing	fastq	HCN15_R1.fq.gz	HCN15_R2.fq.gz
PRJNA656389	SAMN15870944	HCN17	Bubalus bubalis digestive tract metagenome	WGS	METAGENOMIC	PCR	paired	ILLUMINA	Illumina NovaSeq 6000	Whole metagenomic sequencing	fastq	HCN17_R1.fq.gz	HCN17_R2.fq.gz
PRJNA656389	SAMN15870945	HCN18	Bubalus bubalis digestive tract metagenome	WGS	METAGENOMIC	PCR	paired	ILLUMINA	Illumina NovaSeq 6000	Whole metagenomic sequencing	fastq	HCN18_R1.fq.gz	HCN18_R2.fq.gz
PRJNA656389	SAMN15870946	HCN19	Bubalus bubalis digestive tract metagenome	WGS	METAGENOMIC	PCR	paired	ILLUMINA	Illumina NovaSeq 6000	Whole metagenomic sequencing	fastq	HCN19_R1.fq.gz	HCN19_R2.fq.gz
PRJNA656389	SAMN15870947	HCN20	Bubalus bubalis digestive tract metagenome	WGS	METAGENOMIC	PCR	paired	ILLUMINA	Illumina NovaSeq 6000	Whole metagenomic sequencing	fastq	HCN20_R1.fq.gz	HCN20_R2.fq.gz
PRJNA656389	SAMN15870948	HCN21	Bubalus bubalis digestive tract metagenome	WGS	METAGENOMIC	PCR	paired	ILLUMINA	Illumina NovaSeq 6000	Whole metagenomic sequencing	fastq	HCN21_R1.fq.gz	HCN21_R2.fq.gz
PRJNA656389	SAMN15870949	HCN22	Bubalus bubalis digestive tract metagenome	WGS	METAGENOMIC	PCR	paired	ILLUMINA	Illumina NovaSeq 6000	Whole metagenomic sequencing	fastq	HCN22_R1.fq.gz	HCN22_R2.fq.gz
PRJNA656389	SAMN15870950	HCN23	Bubalus bubalis digestive tract metagenome	WGS	METAGENOMIC	PCR	paired	ILLUMINA	Illumina NovaSeq 6000	Whole metagenomic sequencing	fastq	HCN23_R1.fq.gz	HCN23_R2.fq.gz
PRJNA656389	SAMN15870951	HCN24	Bubalus bubalis digestive tract metagenome	WGS	METAGENOMIC	PCR	paired	ILLUMINA	Illumina NovaSeq 6000	Whole metagenomic sequencing	fastq	HCN24_R1.fq.gz	HCN24_R2.fq.gz
PRJNA656389	SAMN15870952	HCN25	Bubalus bubalis digestive tract metagenome	WGS	METAGENOMIC	PCR	paired	ILLUMINA	Illumina NovaSeq 6000	Whole metagenomic sequencing	fastq	HCN25_R1.fq.gz	HCN25_R2.fq.gz
PRJNA656389	SAMN15870953	HCN26	Bubalus bubalis digestive tract metagenome	WGS	METAGENOMIC	PCR	paired	ILLUMINA	Illumina NovaSeq 6000	Whole metagenomic sequencing	fastq	HCN26_R1.fq.gz	HCN26_R2.fq.gz
PRJNA656389	SAMN15870954	HCN27	Bubalus bubalis digestive tract metagenome	WGS	METAGENOMIC	PCR	paired	ILLUMINA	Illumina NovaSeq 6000	Whole metagenomic sequencing	fastq	HCN27_R1.fq.gz	HCN27_R2.fq.gz
PRJNA656389	SAMN15870955	HCN28	Bubalus bubalis digestive tract metagenome	WGS	METAGENOMIC	PCR	paired	ILLUMINA	Illumina NovaSeq 6000	Whole metagenomic sequencing	fastq	HCN28_R1.fq.gz	HCN28_R2.fq.gz
PRJNA656389	SAMN15870956	HCN29	Bubalus bubalis digestive tract metagenome	WGS	METAGENOMIC	PCR	paired	ILLUMINA	Illumina NovaSeq 6000	Whole metagenomic sequencing	fastq	HCN29_R1.fq.gz	HCN29_R2.fq.gz
PRJNA656389	SAMN15870957	HCN30	Bubalus bubalis digestive tract metagenome	WGS	METAGENOMIC	PCR	paired	ILLUMINA	Illumina NovaSeq 6000	Whole metagenomic sequencing	fastq	HCN30_R1.fq.gz	HCN30_R2.fq.gz
PRJNA656389	SAMN15870958	HCN31	Bubalus bubalis digestive tract metagenome	WGS	METAGENOMIC	PCR	paired	ILLUMINA	Illumina NovaSeq 6000	Whole metagenomic sequencing	fastq	HCN31_R1.fq.gz	HCN31_R2.fq.gz
PRJNA656389	SAMN15870959	SNS1	Bubalus bubalis digestive tract metagenome	WGS	METAGENOMIC	PCR	paired	ILLUMINA	Illumina NovaSeq 6000	Whole metagenomic sequencing	fastq	SNS1_R1.fq.gz	SNS1_R2.fq.gz
PRJNA656389	SAMN15870960	SNS2	Bubalus bubalis digestive tract metagenome	WGS	METAGENOMIC	PCR	paired	ILLUMINA	Illumina NovaSeq 6000	Whole metagenomic sequencing	fastq	SNS2_R1.fq.gz	SNS2_R2.fq.gz
PRJNA656389	SAMN15870961	SNS3	Bubalus bubalis digestive tract metagenome	WGS	METAGENOMIC	PCR	paired	ILLUMINA	Illumina NovaSeq 6000	Whole metagenomic sequencing	fastq	SNS3_R1.fq.gz	SNS3_R2.fq.gz
PRJNA656389	SAMN15870962	SNS4	Bubalus bubalis digestive tract metagenome	WGS	METAGENOMIC	PCR	paired	ILLUMINA	Illumina NovaSeq 6000	Whole metagenomic sequencing	fastq	SNS4_R1.fq.gz	SNS4_R2.fq.gz
PRJNA656389	SAMN15870963	SNS5	Bubalus bubalis digestive tract metagenome	WGS	METAGENOMIC	PCR	paired	ILLUMINA	Illumina NovaSeq 6000	Whole metagenomic sequencing	fastq	SNS5_R1.fq.gz	SNS5_R2.fq.gz
PRJNA656389	SAMN15870964	SNS6	Bubalus bubalis digestive tract metagenome	WGS	METAGENOMIC	PCR	paired	ILLUMINA	Illumina NovaSeq 6000	Whole metagenomic sequencing	fastq	SNS6_R1.fq.gz	SNS6_R2.fq.gz
PRJNA656389	SAMN15870965	SNS7	Bubalus bubalis digestive tract metagenome	WGS	METAGENOMIC	PCR	paired	ILLUMINA	Illumina NovaSeq 6000	Whole metagenomic sequencing	fastq	SNS7_R1.fq.gz	SNS7_R2.fq.gz
PRJNA656389	SAMN15870966	SNS8	Bubalus bubalis digestive tract metagenome	WGS	METAGENOMIC	PCR	paired	ILLUMINA	Illumina NovaSeq 6000	Whole metagenomic sequencing	fastq	SNS8_R1.fq.gz	SNS8_R2.fq.gz
PRJNA656389	SAMN15870967	SNS9	Bubalus bubalis digestive tract metagenome	WGS	METAGENOMIC	PCR	paired	ILLUMINA	Illumina NovaSeq 6000	Whole metagenomic sequencing	fastq	SNS9_R1.fq.gz	SNS9_R2.fq.gz
PRJNA656389	SAMN15870968	SNS10	Bubalus bubalis digestive tract metagenome	WGS	METAGENOMIC	PCR	paired	ILLUMINA	Illumina NovaSeq 6000	Whole metagenomic sequencing	fastq	SNS10_R1.fq.gz	SNS10_R2.fq.gz
PRJNA656389	SAMN15870969	SNS12	Bubalus bubalis digestive tract metagenome	WGS	METAGENOMIC	PCR	paired	ILLUMINA	Illumina NovaSeq 6000	Whole metagenomic sequencing	fastq	SNS12_R1.fq.gz	SNS12_R2.fq.gz
PRJNA656389	SAMN15870970	SNS14	Bubalus bubalis digestive tract metagenome	WGS	METAGENOMIC	PCR	paired	ILLUMINA	Illumina NovaSeq 6000	Whole metagenomic sequencing	fastq	SNS14_R1.fq.gz	SNS14_R2.fq.gz
PRJNA656389	SAMN15870971	SNS15	Bubalus bubalis digestive tract metagenome	WGS	METAGENOMIC	PCR	paired	ILLUMINA	Illumina NovaSeq 6000	Whole metagenomic sequencing	fastq	SNS15_R1.fq.gz	SNS15_R2.fq.gz
PRJNA656389	SAMN15870972	SMS1	Bubalus bubalis digestive tract metagenome	WGS	METAGENOMIC	PCR	paired	ILLUMINA	Illumina NovaSeq 6000	Whole metagenomic sequencing	fastq	SMS1_R1.fq.gz	SMS1_R2.fq.gz
PRJNA656389	SAMN15870973	SMS4	Bubalus bubalis digestive tract metagenome	WGS	METAGENOMIC	PCR	paired	ILLUMINA	Illumina NovaSeq 6000	Whole metagenomic sequencing	fastq	SMS4_R1.fq.gz	SMS4_R2.fq.gz
PRJNA656389	SAMN15870974	SMS5	Bubalus bubalis digestive tract metagenome	WGS	METAGENOMIC	PCR	paired	ILLUMINA	Illumina NovaSeq 6000	Whole metagenomic sequencing	fastq	SMS5_R1.fq.gz	SMS5_R2.fq.gz
PRJNA656389	SAMN15870975	SMS6	Bubalus bubalis digestive tract metagenome	WGS	METAGENOMIC	PCR	paired	ILLUMINA	Illumina NovaSeq 6000	Whole metagenomic sequencing	fastq	SMS6_R1.fq.gz	SMS6_R2.fq.gz
PRJNA656389	SAMN15870976	SMS7	Bubalus bubalis digestive tract metagenome	WGS	METAGENOMIC	PCR	paired	ILLUMINA	Illumina NovaSeq 6000	Whole metagenomic sequencing	fastq	SMS7_R1.fq.gz	SMS7_R2.fq.gz
PRJNA656389	SAMN15870977	SMS8	Bubalus bubalis digestive tract metagenome	WGS	METAGENOMIC	PCR	paired	ILLUMINA	Illumina NovaSeq 6000	Whole metagenomic sequencing	fastq	SMS8_R1.fq.gz	SMS8_R2.fq.gz
PRJNA656389	SAMN15870978	SMS9	Bubalus bubalis digestive tract metagenome	WGS	METAGENOMIC	PCR	paired	ILLUMINA	Illumina NovaSeq 6000	Whole metagenomic sequencing	fastq	SMS9_R1.fq.gz	SMS9_R2.fq.gz
PRJNA656389	SAMN15870979	SMS10	Bubalus bubalis digestive tract metagenome	WGS	METAGENOMIC	PCR	paired	ILLUMINA	Illumina NovaSeq 6000	Whole metagenomic sequencing	fastq	SMS10_R1.fq.gz	SMS10_R2.fq.gz
PRJNA656389	SAMN15870980	SMS11	Bubalus bubalis digestive tract metagenome	WGS	METAGENOMIC	PCR	paired	ILLUMINA	Illumina NovaSeq 6000	Whole metagenomic sequencing	fastq	SMS11_R1.fq.gz	SMS11_R2.fq.gz
PRJNA656389	SAMN15870981	SMS12	Bubalus bubalis digestive tract metagenome	WGS	METAGENOMIC	PCR	paired	ILLUMINA	Illumina NovaSeq 6000	Whole metagenomic sequencing	fastq	SMS12_R1.fq.gz	SMS12_R2.fq.gz
PRJNA656389	SAMN15870982	SMS13	Bubalus bubalis digestive tract metagenome	WGS	METAGENOMIC	PCR	paired	ILLUMINA	Illumina NovaSeq 6000	Whole metagenomic sequencing	fastq	SMS13_R1.fq.gz	SMS13_R2.fq.gz
PRJNA656389	SAMN15870983	SMS14	Bubalus bubalis digestive tract metagenome	WGS	METAGENOMIC	PCR	paired	ILLUMINA	Illumina NovaSeq 6000	Whole metagenomic sequencing	fastq	SMS14_R1.fq.gz	SMS14_R2.fq.gz
PRJNA656389	SAMN15870984	HDN7	Bubalus bubalis digestive tract metagenome	WGS	METAGENOMIC	PCR	paired	ILLUMINA	Illumina NovaSeq 6000	Whole metagenomic sequencing	fastq	HDN7_R1.fq.gz	HDN7_R2.fq.gz
PRJNA656389	SAMN15870985	HDN8	Bubalus bubalis digestive tract metagenome	WGS	METAGENOMIC	PCR	paired	ILLUMINA	Illumina NovaSeq 6000	Whole metagenomic sequencing	fastq	HDN8_R1.fq.gz	HDN8_R2.fq.gz
PRJNA656389	SAMN15870986	HDN9	Bubalus bubalis digestive tract metagenome	WGS	METAGENOMIC	PCR	paired	ILLUMINA	Illumina NovaSeq 6000	Whole metagenomic sequencing	fastq	HDN9_R1.fq.gz	HDN9_R2.fq.gz
PRJNA656389	SAMN15870987	HDN5	Bubalus bubalis digestive tract metagenome	WGS	METAGENOMIC	PCR	paired	ILLUMINA	Illumina NovaSeq 6000	Whole metagenomic sequencing	fastq	HDN5_R1.fq.gz	HDN5_R2.fq.gz
PRJNA656389	SAMN15870988	HDN2	Bubalus bubalis digestive tract metagenome	WGS	METAGENOMIC	PCR	paired	ILLUMINA	Illumina NovaSeq 6000	Whole metagenomic sequencing	fastq	HDN2_R1.fq.gz	HDN2_R2.fq.gz
PRJNA656389	SAMN15870989	HDN3	Bubalus bubalis digestive tract metagenome	WGS	METAGENOMIC	PCR	paired	ILLUMINA	Illumina NovaSeq 6000	Whole metagenomic sequencing	fastq	HDN3_R1.fq.gz	HDN3_R2.fq.gz
PRJNA656389	SAMN15870990	HDN6	Bubalus bubalis digestive tract metagenome	WGS	METAGENOMIC	PCR	paired	ILLUMINA	Illumina NovaSeq 6000	Whole metagenomic sequencing	fastq	HDN6_R1.fq.gz	HDN6_R2.fq.gz
PRJNA656389	SAMN15870991	HDN10	Bubalus bubalis digestive tract metagenome	WGS	METAGENOMIC	PCR	paired	ILLUMINA	Illumina NovaSeq 6000	Whole metagenomic sequencing	fastq	HDN10_R1.fq.gz	HDN10_R2.fq.gz
PRJNA656389	SAMN15870992	HDN1	Bubalus bubalis digestive tract metagenome	WGS	METAGENOMIC	PCR	paired	ILLUMINA	Illumina NovaSeq 6000	Whole metagenomic sequencing	fastq	HDN1_R1.fq.gz	HDN1_R2.fq.gz
PRJNA656389	SAMN15870993	HDN4	Bubalus bubalis digestive tract metagenome	WGS	METAGENOMIC	PCR	paired	ILLUMINA	Illumina NovaSeq 6000	Whole metagenomic sequencing	fastq	HDN4_R1.fq.gz	HDN4_R2.fq.gz
PRJNA656389	SAMN15870994	SZCM1	Bubalus bubalis digestive tract metagenome	WGS	METAGENOMIC	PCR	paired	ILLUMINA	Illumina NovaSeq 6000	Whole metagenomic sequencing	fastq	SZCM1_R1.fq.gz	SZCM1_R2.fq.gz
PRJNA656389	SAMN15870995	SZCM2	Bubalus bubalis digestive tract metagenome	WGS	METAGENOMIC	PCR	paired	ILLUMINA	Illumina NovaSeq 6000	Whole metagenomic sequencing	fastq	SZCM2_R1.fq.gz	SZCM2_R2.fq.gz
PRJNA656389	SAMN15870996	SZCM3	Bubalus bubalis digestive tract metagenome	WGS	METAGENOMIC	PCR	paired	ILLUMINA	Illumina NovaSeq 6000	Whole metagenomic sequencing	fastq	SZCM3_R1.fq.gz	SZCM3_R2.fq.gz
PRJNA656389	SAMN15870997	SZCM4	Bubalus bubalis digestive tract metagenome	WGS	METAGENOMIC	PCR	paired	ILLUMINA	Illumina NovaSeq 6000	Whole metagenomic sequencing	fastq	SZCM4_R1.fq.gz	SZCM4_R2.fq.gz
PRJNA656389	SAMN15870998	SZCM5	Bubalus bubalis digestive tract metagenome	WGS	METAGENOMIC	PCR	paired	ILLUMINA	Illumina NovaSeq 6000	Whole metagenomic sequencing	fastq	SZCM5_R1.fq.gz	SZCM5_R2.fq.gz
PRJNA656389	SAMN15870999	SZCM6	Bubalus bubalis digestive tract metagenome	WGS	METAGENOMIC	PCR	paired	ILLUMINA	Illumina NovaSeq 6000	Whole metagenomic sequencing	fastq	SZCM6_R1.fq.gz	SZCM6_R2.fq.gz
PRJNA656389	SAMN15871000	SZCM7	Bubalus bubalis digestive tract metagenome	WGS	METAGENOMIC	PCR	paired	ILLUMINA	Illumina NovaSeq 6000	Whole metagenomic sequencing	fastq	SZCM7_R1.fq.gz	SZCM7_R2.fq.gz
PRJNA656389	SAMN15871001	SZCM8	Bubalus bubalis digestive tract metagenome	WGS	METAGENOMIC	PCR	paired	ILLUMINA	Illumina NovaSeq 6000	Whole metagenomic sequencing	fastq	SZCM8_R1.fq.gz	SZCM8_R2.fq.gz
PRJNA656389	SAMN15871002	SZCM9	Bubalus bubalis digestive tract metagenome	WGS	METAGENOMIC	PCR	paired	ILLUMINA	Illumina NovaSeq 6000	Whole metagenomic sequencing	fastq	SZCM9_R1.fq.gz	SZCM9_R2.fq.gz
PRJNA656389	SAMN15871003	SZCM10	Bubalus bubalis digestive tract metagenome	WGS	METAGENOMIC	PCR	paired	ILLUMINA	Illumina NovaSeq 6000	Whole metagenomic sequencing	fastq	SZCM10_R1.fq.gz	SZCM10_R2.fq.gz
PRJNA656389	SAMN15871004	SZCM11	Bubalus bubalis digestive tract metagenome	WGS	METAGENOMIC	PCR	paired	ILLUMINA	Illumina NovaSeq 6000	Whole metagenomic sequencing	fastq	SZCM11_R1.fq.gz	SZCM11_R2.fq.gz
PRJNA656389	SAMN15871005	SZCM12	Bubalus bubalis digestive tract metagenome	WGS	METAGENOMIC	PCR	paired	ILLUMINA	Illumina NovaSeq 6000	Whole metagenomic sequencing	fastq	SZCM12_R1.fq.gz	SZCM12_R2.fq.gz
PRJNA656389	SAMN15871006	SZCM13	Bubalus bubalis digestive tract metagenome	WGS	METAGENOMIC	PCR	paired	ILLUMINA	Illumina NovaSeq 6000	Whole metagenomic sequencing	fastq	SZCM13_R1.fq.gz	SZCM13_R2.fq.gz
PRJNA656389	SAMN15871007	SZCM14	Bubalus bubalis digestive tract metagenome	WGS	METAGENOMIC	PCR	paired	ILLUMINA	Illumina NovaSeq 6000	Whole metagenomic sequencing	fastq	SZCM14_R1.fq.gz	SZCM14_R2.fq.gz
PRJNA656389	SAMN15871008	SZCM15	Bubalus bubalis digestive tract metagenome	WGS	METAGENOMIC	PCR	paired	ILLUMINA	Illumina NovaSeq 6000	Whole metagenomic sequencing	fastq	SZCM15_R1.fq.gz	SZCM15_R2.fq.gz
PRJNA656389	SAMN15871009	SZCM16	Bubalus bubalis digestive tract metagenome	WGS	METAGENOMIC	PCR	paired	ILLUMINA	Illumina NovaSeq 6000	Whole metagenomic sequencing	fastq	SZCM16_R1.fq.gz	SZCM16_R2.fq.gz
PRJNA656389	SAMN15871010	SZCM17	Bubalus bubalis digestive tract metagenome	WGS	METAGENOMIC	PCR	paired	ILLUMINA	Illumina NovaSeq 6000	Whole metagenomic sequencing	fastq	SZCM17_R1.fq.gz	SZCM17_R2.fq.gz
PRJNA656389	SAMN15871011	SZCM18	Bubalus bubalis digestive tract metagenome	WGS	METAGENOMIC	PCR	paired	ILLUMINA	Illumina NovaSeq 6000	Whole metagenomic sequencing	fastq	SZCM18_R1.fq.gz	SZCM18_R2.fq.gz
PRJNA656389	SAMN15871012	SZCM19	Bubalus bubalis digestive tract metagenome	WGS	METAGENOMIC	PCR	paired	ILLUMINA	Illumina NovaSeq 6000	Whole metagenomic sequencing	fastq	SZCM19_R1.fq.gz	SZCM19_R2.fq.gz
PRJNA656389	SAMN15871013	SZCM20	Bubalus bubalis digestive tract metagenome	WGS	METAGENOMIC	PCR	paired	ILLUMINA	Illumina NovaSeq 6000	Whole metagenomic sequencing	fastq	SZCM20_R1.fq.gz	SZCM20_R2.fq.gz
PRJNA656389	SAMN15871014	SZCM21	Bubalus bubalis digestive tract metagenome	WGS	METAGENOMIC	PCR	paired	ILLUMINA	Illumina NovaSeq 6000	Whole metagenomic sequencing	fastq	SZCM21_R1.fq.gz	SZCM21_R2.fq.gz
PRJNA656389	SAMN15871015	SZCM22	Bubalus bubalis digestive tract metagenome	WGS	METAGENOMIC	PCR	paired	ILLUMINA	Illumina NovaSeq 6000	Whole metagenomic sequencing	fastq	SZCM22_R1.fq.gz	SZCM22_R2.fq.gz
PRJNA656389	SAMN15871016	SZCM23	Bubalus bubalis digestive tract metagenome	WGS	METAGENOMIC	PCR	paired	ILLUMINA	Illumina NovaSeq 6000	Whole metagenomic sequencing	fastq	SZCM23_R1.fq.gz	SZCM23_R2.fq.gz
PRJNA656389	SAMN15871017	SZCM24	Bubalus bubalis digestive tract metagenome	WGS	METAGENOMIC	PCR	paired	ILLUMINA	Illumina NovaSeq 6000	Whole metagenomic sequencing	fastq	SZCM24_R1.fq.gz	SZCM24_R2.fq.gz
PRJNA656389	SAMN15871018	SZCM25	Bubalus bubalis digestive tract metagenome	WGS	METAGENOMIC	PCR	paired	ILLUMINA	Illumina NovaSeq 6000	Whole metagenomic sequencing	fastq	SZCM25_R1.fq.gz	SZCM25_R2.fq.gz
PRJNA656389	SAMN15871019	SZCM26	Bubalus bubalis digestive tract metagenome	WGS	METAGENOMIC	PCR	paired	ILLUMINA	Illumina NovaSeq 6000	Whole metagenomic sequencing	fastq	SZCM26_R1.fq.gz	SZCM26_R2.fq.gz
PRJNA656389	SAMN15871020	SZCM27	Bubalus bubalis digestive tract metagenome	WGS	METAGENOMIC	PCR	paired	ILLUMINA	Illumina NovaSeq 6000	Whole metagenomic sequencing	fastq	SZCM27_R1.fq.gz	SZCM27_R2.fq.gz
PRJNA656389	SAMN15871021	SZCM28	Bubalus bubalis digestive tract metagenome	WGS	METAGENOMIC	PCR	paired	ILLUMINA	Illumina NovaSeq 6000	Whole metagenomic sequencing	fastq	SZCM28_R1.fq.gz	SZCM28_R2.fq.gz
PRJNA656389	SAMN15871022	SZCM29	Bubalus bubalis digestive tract metagenome	WGS	METAGENOMIC	PCR	paired	ILLUMINA	Illumina NovaSeq 6000	Whole metagenomic sequencing	fastq	SZCM29_R1.fq.gz	SZCM29_R2.fq.gz
PRJNA656389	SAMN15871023	SZCM30	Bubalus bubalis digestive tract metagenome	WGS	METAGENOMIC	PCR	paired	ILLUMINA	Illumina NovaSeq 6000	Whole metagenomic sequencing	fastq	SZCM30_R1.fq.gz	SZCM30_R2.fq.gz
PRJNA656389	SAMN15871024	LCN1	Bubalus bubalis digestive tract metagenome	WGS	METAGENOMIC	PCR	paired	ILLUMINA	Illumina NovaSeq 6000	Whole metagenomic sequencing	fastq	LCN1_R1.fq.gz	LCN1_R2.fq.gz
PRJNA656389	SAMN15871025	LCN2	Bubalus bubalis digestive tract metagenome	WGS	METAGENOMIC	PCR	paired	ILLUMINA	Illumina NovaSeq 6000	Whole metagenomic sequencing	fastq	LCN2_R1.fq.gz	LCN2_R2.fq.gz
PRJNA656389	SAMN15871026	LCN3	Bubalus bubalis digestive tract metagenome	WGS	METAGENOMIC	PCR	paired	ILLUMINA	Illumina NovaSeq 6000	Whole metagenomic sequencing	fastq	LCN3_R1.fq.gz	LCN3_R2.fq.gz
PRJNA656389	SAMN15871027	LCN4	Bubalus bubalis digestive tract metagenome	WGS	METAGENOMIC	PCR	paired	ILLUMINA	Illumina NovaSeq 6000	Whole metagenomic sequencing	fastq	LCN4_R1.fq.gz	LCN4_R2.fq.gz
PRJNA656389	SAMN15871028	LCN5	Bubalus bubalis digestive tract metagenome	WGS	METAGENOMIC	PCR	paired	ILLUMINA	Illumina NovaSeq 6000	Whole metagenomic sequencing	fastq	LCN5_R1.fq.gz	LCN5_R2.fq.gz
PRJNA656389	SAMN15871029	LCN6	Bubalus bubalis digestive tract metagenome	WGS	METAGENOMIC	PCR	paired	ILLUMINA	Illumina NovaSeq 6000	Whole metagenomic sequencing	fastq	LCN6_R1.fq.gz	LCN6_R2.fq.gz
PRJNA656389	SAMN15871030	LCN7	Bubalus bubalis digestive tract metagenome	WGS	METAGENOMIC	PCR	paired	ILLUMINA	Illumina NovaSeq 6000	Whole metagenomic sequencing	fastq	LCN7_R1.fq.gz	LCN7_R2.fq.gz
PRJNA656389	SAMN15871031	LCN8	Bubalus bubalis digestive tract metagenome	WGS	METAGENOMIC	PCR	paired	ILLUMINA	Illumina NovaSeq 6000	Whole metagenomic sequencing	fastq	LCN8_R1.fq.gz	LCN8_R2.fq.gz
PRJNA656389	SAMN15871032	LCN9	Bubalus bubalis digestive tract metagenome	WGS	METAGENOMIC	PCR	paired	ILLUMINA	Illumina NovaSeq 6000	Whole metagenomic sequencing	fastq	LCN9_R1.fq.gz	LCN9_R2.fq.gz
PRJNA656389	SAMN15871033	LCN10	Bubalus bubalis digestive tract metagenome	WGS	METAGENOMIC	PCR	paired	ILLUMINA	Illumina NovaSeq 6000	Whole metagenomic sequencing	fastq	LCN10_R1.fq.gz	LCN10_R2.fq.gz
PRJNA656389	SAMN15871034	LCN11	Bubalus bubalis digestive tract metagenome	WGS	METAGENOMIC	PCR	paired	ILLUMINA	Illumina NovaSeq 6000	Whole metagenomic sequencing	fastq	LCN11_R1.fq.gz	LCN11_R2.fq.gz
PRJNA656389	SAMN15871035	LCN12	Bubalus bubalis digestive tract metagenome	WGS	METAGENOMIC	PCR	paired	ILLUMINA	Illumina NovaSeq 6000	Whole metagenomic sequencing	fastq	LCN12_R1.fq.gz	LCN12_R2.fq.gz
PRJNA656389	SAMN15871036	LCN13	Bubalus bubalis digestive tract metagenome	WGS	METAGENOMIC	PCR	paired	ILLUMINA	Illumina NovaSeq 6000	Whole metagenomic sequencing	fastq	LCN13_R1.fq.gz	LCN13_R2.fq.gz
PRJNA656389	SAMN15871037	LCN14	Bubalus bubalis digestive tract metagenome	WGS	METAGENOMIC	PCR	paired	ILLUMINA	Illumina NovaSeq 6000	Whole metagenomic sequencing	fastq	LCN14_R1.fq.gz	LCN14_R2.fq.gz
PRJNA656389	SAMN15871038	LCN15	Bubalus bubalis digestive tract metagenome	WGS	METAGENOMIC	PCR	paired	ILLUMINA	Illumina NovaSeq 6000	Whole metagenomic sequencing	fastq	LCN15_R1.fq.gz	LCN15_R2.fq.gz
PRJNA656389	SAMN15871039	LCN16	Bubalus bubalis digestive tract metagenome	WGS	METAGENOMIC	PCR	paired	ILLUMINA	Illumina NovaSeq 6000	Whole metagenomic sequencing	fastq	LCN16_R1.fq.gz	LCN16_R2.fq.gz
PRJNA656389	SAMN15871040	LCN17	Bubalus bubalis digestive tract metagenome	WGS	METAGENOMIC	PCR	paired	ILLUMINA	Illumina NovaSeq 6000	Whole metagenomic sequencing	fastq	LCN17_R1.fq.gz	LCN17_R2.fq.gz
PRJNA656389	SAMN15871041	LCN18	Bubalus bubalis digestive tract metagenome	WGS	METAGENOMIC	PCR	paired	ILLUMINA	Illumina NovaSeq 6000	Whole metagenomic sequencing	fastq	LCN18_R1.fq.gz	LCN18_R2.fq.gz
PRJNA656389	SAMN15871042	LCN19	Bubalus bubalis digestive tract metagenome	WGS	METAGENOMIC	PCR	paired	ILLUMINA	Illumina NovaSeq 6000	Whole metagenomic sequencing	fastq	LCN19_R1.fq.gz	LCN19_R2.fq.gz
PRJNA656389	SAMN15871043	LCN20	Bubalus bubalis digestive tract metagenome	WGS	METAGENOMIC	PCR	paired	ILLUMINA	Illumina NovaSeq 6000	Whole metagenomic sequencing	fastq	LCN20_R1.fq.gz	LCN20_R2.fq.gz
PRJNA656389	SAMN15871044	LCN21	Bubalus bubalis digestive tract metagenome	WGS	METAGENOMIC	PCR	paired	ILLUMINA	Illumina NovaSeq 6000	Whole metagenomic sequencing	fastq	LCN21_R1.fq.gz	LCN21_R2.fq.gz
PRJNA656389	SAMN15871045	LCN22	Bubalus bubalis digestive tract metagenome	WGS	METAGENOMIC	PCR	paired	ILLUMINA	Illumina NovaSeq 6000	Whole metagenomic sequencing	fastq	LCN22_R1.fq.gz	LCN22_R2.fq.gz
PRJNA656389	SAMN15871046	LCN23	Bubalus bubalis digestive tract metagenome	WGS	METAGENOMIC	PCR	paired	ILLUMINA	Illumina NovaSeq 6000	Whole metagenomic sequencing	fastq	LCN23_R1.fq.gz	LCN23_R2.fq.gz
PRJNA656389	SAMN15871047	LCN24	Bubalus bubalis digestive tract metagenome	WGS	METAGENOMIC	PCR	paired	ILLUMINA	Illumina NovaSeq 6000	Whole metagenomic sequencing	fastq	LCN24_R1.fq.gz	LCN24_R2.fq.gz
PRJNA656389	SAMN15871048	LCN25	Bubalus bubalis digestive tract metagenome	WGS	METAGENOMIC	PCR	paired	ILLUMINA	Illumina NovaSeq 6000	Whole metagenomic sequencing	fastq	LCN25_R1.fq.gz	LCN25_R2.fq.gz
PRJNA656389	SAMN15871049	XBCN	Bubalus bubalis digestive tract metagenome	WGS	METAGENOMIC	PCR	paired	ILLUMINA	Illumina NovaSeq 6000	Whole metagenomic sequencing	fastq	XBCN_R1.fq.gz	XBCN_R2.fq.gz
PRJNA656389	SAMN15871050	XBCN1	Bubalus bubalis digestive tract metagenome	WGS	METAGENOMIC	PCR	paired	ILLUMINA	Illumina NovaSeq 6000	Whole metagenomic sequencing	fastq	XBCN1_R1.fq.gz	XBCN1_R2.fq.gz
PRJNA656389	SAMN15871051	XBCN12	Bubalus bubalis digestive tract metagenome	WGS	METAGENOMIC	PCR	paired	ILLUMINA	Illumina NovaSeq 6000	Whole metagenomic sequencing	fastq	XBCN12_R1.fq.gz	XBCN12_R2.fq.gz
PRJNA656389	SAMN15871052	XBCN16	Bubalus bubalis digestive tract metagenome	WGS	METAGENOMIC	PCR	paired	ILLUMINA	Illumina NovaSeq 6000	Whole metagenomic sequencing	fastq	XBCN16_R1.fq.gz	XBCN16_R2.fq.gz
PRJNA656389	SAMN15871053	XBCN18	Bubalus bubalis digestive tract metagenome	WGS	METAGENOMIC	PCR	paired	ILLUMINA	Illumina NovaSeq 6000	Whole metagenomic sequencing	fastq	XBCN18_R1.fq.gz	XBCN18_R2.fq.gz
PRJNA656389	SAMN15871054	XBCN2	Bubalus bubalis digestive tract metagenome	WGS	METAGENOMIC	PCR	paired	ILLUMINA	Illumina NovaSeq 6000	Whole metagenomic sequencing	fastq	XBCN2_R1.fq.gz	XBCN2_R2.fq.gz
PRJNA656389	SAMN15871055	XBCN24	Bubalus bubalis digestive tract metagenome	WGS	METAGENOMIC	PCR	paired	ILLUMINA	Illumina NovaSeq 6000	Whole metagenomic sequencing	fastq	XBCN24_R1.fq.gz	XBCN24_R2.fq.gz
PRJNA656389	SAMN15871056	XBCN25	Bubalus bubalis digestive tract metagenome	WGS	METAGENOMIC	PCR	paired	ILLUMINA	Illumina NovaSeq 6000	Whole metagenomic sequencing	fastq	XBCN25_R1.fq.gz	XBCN25_R2.fq.gz
PRJNA656389	SAMN15871057	XBCN28	Bubalus bubalis digestive tract metagenome	WGS	METAGENOMIC	PCR	paired	ILLUMINA	Illumina NovaSeq 6000	Whole metagenomic sequencing	fastq	XBCN28_R1.fq.gz	XBCN28_R2.fq.gz
PRJNA656389	SAMN15871058	XBCN29	Bubalus bubalis digestive tract metagenome	WGS	METAGENOMIC	PCR	paired	ILLUMINA	Illumina NovaSeq 6000	Whole metagenomic sequencing	fastq	XBCN29_R1.fq.gz	XBCN29_R2.fq.gz
PRJNA656389	SAMN15871059	XBCN3	Bubalus bubalis digestive tract metagenome	WGS	METAGENOMIC	PCR	paired	ILLUMINA	Illumina NovaSeq 6000	Whole metagenomic sequencing	fastq	XBCN3_R1.fq.gz	XBCN3_R2.fq.gz
PRJNA656389	SAMN15871060	XBCN30	Bubalus bubalis digestive tract metagenome	WGS	METAGENOMIC	PCR	paired	ILLUMINA	Illumina NovaSeq 6000	Whole metagenomic sequencing	fastq	XBCN30_R1.fq.gz	XBCN30_R2.fq.gz
PRJNA656389	SAMN15871061	XBCN31	Bubalus bubalis digestive tract metagenome	WGS	METAGENOMIC	PCR	paired	ILLUMINA	Illumina NovaSeq 6000	Whole metagenomic sequencing	fastq	XBCN31_R1.fq.gz	XBCN31_R2.fq.gz
PRJNA656389	SAMN15871062	XBCN32	Bubalus bubalis digestive tract metagenome	WGS	METAGENOMIC	PCR	paired	ILLUMINA	Illumina NovaSeq 6000	Whole metagenomic sequencing	fastq	XBCN32_R1.fq.gz	XBCN32_R2.fq.gz
PRJNA656389	SAMN15871063	XBCN34	Bubalus bubalis digestive tract metagenome	WGS	METAGENOMIC	PCR	paired	ILLUMINA	Illumina NovaSeq 6000	Whole metagenomic sequencing	fastq	XBCN34_R1.fq.gz	XBCN34_R2.fq.gz
PRJNA656389	SAMN15871064	XBCN35	Bubalus bubalis digestive tract metagenome	WGS	METAGENOMIC	PCR	paired	ILLUMINA	Illumina NovaSeq 6000	Whole metagenomic sequencing	fastq	XBCN35_R1.fq.gz	XBCN35_R2.fq.gz
PRJNA656389	SAMN15871065	XBCN6	Bubalus bubalis digestive tract metagenome	WGS	METAGENOMIC	PCR	paired	ILLUMINA	Illumina NovaSeq 6000	Whole metagenomic sequencing	fastq	XBCN6_R1.fq.gz	XBCN6_R2.fq.gz
PRJNA656389	SAMN15871066	XBCN9	Bubalus bubalis digestive tract metagenome	WGS	METAGENOMIC	PCR	paired	ILLUMINA	Illumina NovaSeq 6000	Whole metagenomic sequencing	fastq	XBCN9_R1.fq.gz	XBCN9_R2.fq.gz
PRJNA656389	SAMN15871067	XBDN1	Bubalus bubalis digestive tract metagenome	WGS	METAGENOMIC	PCR	paired	ILLUMINA	Illumina NovaSeq 6000	Whole metagenomic sequencing	fastq	XBDN1_R1.fq.gz	XBDN1_R2.fq.gz
PRJNA656389	SAMN15871068	XBDN2	Bubalus bubalis digestive tract metagenome	WGS	METAGENOMIC	PCR	paired	ILLUMINA	Illumina NovaSeq 6000	Whole metagenomic sequencing	fastq	XBDN2_R1.fq.gz	XBDN2_R2.fq.gz
PRJNA656389	SAMN15871069	XBDN3	Bubalus bubalis digestive tract metagenome	WGS	METAGENOMIC	PCR	paired	ILLUMINA	Illumina NovaSeq 6000	Whole metagenomic sequencing	fastq	XBDN3_R1.fq.gz	XBDN3_R2.fq.gz
PRJNA656389	SAMN15871070	XBDN4	Bubalus bubalis digestive tract metagenome	WGS	METAGENOMIC	PCR	paired	ILLUMINA	Illumina NovaSeq 6000	Whole metagenomic sequencing	fastq	XBDN4_R1.fq.gz	XBDN4_R2.fq.gz
PRJNA656389	SAMN15871071	XBDN5	Bubalus bubalis digestive tract metagenome	WGS	METAGENOMIC	PCR	paired	ILLUMINA	Illumina NovaSeq 6000	Whole metagenomic sequencing	fastq	XBDN5_R1.fq.gz	XBDN5_R2.fq.gz
PRJNA656389	SAMN15871072	XBDN6	Bubalus bubalis digestive tract metagenome	WGS	METAGENOMIC	PCR	paired	ILLUMINA	Illumina NovaSeq 6000	Whole metagenomic sequencing	fastq	XBDN6_R1.fq.gz	XBDN6_R2.fq.gz
PRJNA656389	SAMN15871073	XBDN7	Bubalus bubalis digestive tract metagenome	WGS	METAGENOMIC	PCR	paired	ILLUMINA	Illumina NovaSeq 6000	Whole metagenomic sequencing	fastq	XBDN7_R1.fq.gz	XBDN7_R2.fq.gz
PRJNA656389	SAMN15871074	XBCN10	Bubalus bubalis digestive tract metagenome	WGS	METAGENOMIC	PCR	paired	ILLUMINA	Illumina NovaSeq 6000	Whole metagenomic sequencing	fastq	XBCN10_R1.fq.gz	XBCN10_R2.fq.gz
PRJNA656389	SAMN15871075	XBCN11	Bubalus bubalis digestive tract metagenome	WGS	METAGENOMIC	PCR	paired	ILLUMINA	Illumina NovaSeq 6000	Whole metagenomic sequencing	fastq	XBCN11_R1.fq.gz	XBCN11_R2.fq.gz
PRJNA656389	SAMN15871076	XBCN13	Bubalus bubalis digestive tract metagenome	WGS	METAGENOMIC	PCR	paired	ILLUMINA	Illumina NovaSeq 6000	Whole metagenomic sequencing	fastq	XBCN13_R1.fq.gz	XBCN13_R2.fq.gz
PRJNA656389	SAMN15871077	XBCN14	Bubalus bubalis digestive tract metagenome	WGS	METAGENOMIC	PCR	paired	ILLUMINA	Illumina NovaSeq 6000	Whole metagenomic sequencing	fastq	XBCN14_R1.fq.gz	XBCN14_R2.fq.gz
PRJNA656389	SAMN15871078	XBCN15	Bubalus bubalis digestive tract metagenome	WGS	METAGENOMIC	PCR	paired	ILLUMINA	Illumina NovaSeq 6000	Whole metagenomic sequencing	fastq	XBCN15_R1.fq.gz	XBCN15_R2.fq.gz
PRJNA656389	SAMN15871079	XBCN17	Bubalus bubalis digestive tract metagenome	WGS	METAGENOMIC	PCR	paired	ILLUMINA	Illumina NovaSeq 6000	Whole metagenomic sequencing	fastq	XBCN17_R1.fq.gz	XBCN17_R2.fq.gz
PRJNA656389	SAMN15871080	XBCN19	Bubalus bubalis digestive tract metagenome	WGS	METAGENOMIC	PCR	paired	ILLUMINA	Illumina NovaSeq 6000	Whole metagenomic sequencing	fastq	XBCN19_R1.fq.gz	XBCN19_R2.fq.gz
PRJNA656389	SAMN15871081	XBCN20	Bubalus bubalis digestive tract metagenome	WGS	METAGENOMIC	PCR	paired	ILLUMINA	Illumina NovaSeq 6000	Whole metagenomic sequencing	fastq	XBCN20_R1.fq.gz	XBCN20_R2.fq.gz
PRJNA656389	SAMN15871082	XBCN21	Bubalus bubalis digestive tract metagenome	WGS	METAGENOMIC	PCR	paired	ILLUMINA	Illumina NovaSeq 6000	Whole metagenomic sequencing	fastq	XBCN21_R1.fq.gz	XBCN21_R2.fq.gz
PRJNA656389	SAMN15871083	XBCN22	Bubalus bubalis digestive tract metagenome	WGS	METAGENOMIC	PCR	paired	ILLUMINA	Illumina NovaSeq 6000	Whole metagenomic sequencing	fastq	XBCN22_R1.fq.gz	XBCN22_R2.fq.gz
PRJNA656389	SAMN15871084	XBCN26	Bubalus bubalis digestive tract metagenome	WGS	METAGENOMIC	PCR	paired	ILLUMINA	Illumina NovaSeq 6000	Whole metagenomic sequencing	fastq	XBCN26_R1.fq.gz	XBCN26_R2.fq.gz
PRJNA656389	SAMN15871085	XBCN27	Bubalus bubalis digestive tract metagenome	WGS	METAGENOMIC	PCR	paired	ILLUMINA	Illumina NovaSeq 6000	Whole metagenomic sequencing	fastq	XBCN27_R1.fq.gz	XBCN27_R2.fq.gz
PRJNA656389	SAMN15871086	XBCN33	Bubalus bubalis digestive tract metagenome	WGS	METAGENOMIC	PCR	paired	ILLUMINA	Illumina NovaSeq 6000	Whole metagenomic sequencing	fastq	XBCN33_R1.fq.gz	XBCN33_R2.fq.gz
PRJNA656389	SAMN15871087	XBCN5	Bubalus bubalis digestive tract metagenome	WGS	METAGENOMIC	PCR	paired	ILLUMINA	Illumina NovaSeq 6000	Whole metagenomic sequencing	fastq	XBCN5_R1.fq.gz	XBCN5_R2.fq.gz
PRJNA656389	SAMN15871088	XBCN7	Bubalus bubalis digestive tract metagenome	WGS	METAGENOMIC	PCR	paired	ILLUMINA	Illumina NovaSeq 6000	Whole metagenomic sequencing	fastq	XBCN7_R1.fq.gz	XBCN7_R2.fq.gz
PRJNA656389	SAMN15871089	XBCN8	Bubalus bubalis digestive tract metagenome	WGS	METAGENOMIC	PCR	paired	ILLUMINA	Illumina NovaSeq 6000	Whole metagenomic sequencing	fastq	XBCN8_R1.fq.gz	XBCN8_R2.fq.gz
PRJNA656389	SAMN15871090	ABCN1	Bubalus bubalis digestive tract metagenome	WGS	METAGENOMIC	PCR	paired	ILLUMINA	Illumina NovaSeq 6000	Whole metagenomic sequencing	fastq	ABCN1_R1.fq.gz	ABCN1_R2.fq.gz
PRJNA656389	SAMN15871091	ABCN10	Bubalus bubalis digestive tract metagenome	WGS	METAGENOMIC	PCR	paired	ILLUMINA	Illumina NovaSeq 6000	Whole metagenomic sequencing	fastq	ABCN10_R1.fq.gz	ABCN10_R2.fq.gz
PRJNA656389	SAMN15871092	ABCN11	Bubalus bubalis digestive tract metagenome	WGS	METAGENOMIC	PCR	paired	ILLUMINA	Illumina NovaSeq 6000	Whole metagenomic sequencing	fastq	ABCN11_R1.fq.gz	ABCN11_R2.fq.gz
PRJNA656389	SAMN15871093	ABCN12	Bubalus bubalis digestive tract metagenome	WGS	METAGENOMIC	PCR	paired	ILLUMINA	Illumina NovaSeq 6000	Whole metagenomic sequencing	fastq	ABCN12_R1.fq.gz	ABCN12_R2.fq.gz
PRJNA656389	SAMN15871094	ABCN13	Bubalus bubalis digestive tract metagenome	WGS	METAGENOMIC	PCR	paired	ILLUMINA	Illumina NovaSeq 6000	Whole metagenomic sequencing	fastq	ABCN13_R1.fq.gz	ABCN13_R2.fq.gz
PRJNA656389	SAMN15871095	ABCN14	Bubalus bubalis digestive tract metagenome	WGS	METAGENOMIC	PCR	paired	ILLUMINA	Illumina NovaSeq 6000	Whole metagenomic sequencing	fastq	ABCN14_R1.fq.gz	ABCN14_R2.fq.gz
PRJNA656389	SAMN15871096	ABCN15	Bubalus bubalis digestive tract metagenome	WGS	METAGENOMIC	PCR	paired	ILLUMINA	Illumina NovaSeq 6000	Whole metagenomic sequencing	fastq	ABCN15_R1.fq.gz	ABCN15_R2.fq.gz
PRJNA656389	SAMN15871097	ABCN16	Bubalus bubalis digestive tract metagenome	WGS	METAGENOMIC	PCR	paired	ILLUMINA	Illumina NovaSeq 6000	Whole metagenomic sequencing	fastq	ABCN16_R1.fq.gz	ABCN16_R2.fq.gz
PRJNA656389	SAMN15871098	ABCN17	Bubalus bubalis digestive tract metagenome	WGS	METAGENOMIC	PCR	paired	ILLUMINA	Illumina NovaSeq 6000	Whole metagenomic sequencing	fastq	ABCN17_R1.fq.gz	ABCN17_R2.fq.gz
PRJNA656389	SAMN15871099	ABCN18	Bubalus bubalis digestive tract metagenome	WGS	METAGENOMIC	PCR	paired	ILLUMINA	Illumina NovaSeq 6000	Whole metagenomic sequencing	fastq	ABCN18_R1.fq.gz	ABCN18_R2.fq.gz
PRJNA656389	SAMN15871100	ABCN19	Bubalus bubalis digestive tract metagenome	WGS	METAGENOMIC	PCR	paired	ILLUMINA	Illumina NovaSeq 6000	Whole metagenomic sequencing	fastq	ABCN19_R1.fq.gz	ABCN19_R2.fq.gz
PRJNA656389	SAMN15871101	ABCN2	Bubalus bubalis digestive tract metagenome	WGS	METAGENOMIC	PCR	paired	ILLUMINA	Illumina NovaSeq 6000	Whole metagenomic sequencing	fastq	ABCN2_R1.fq.gz	ABCN2_R2.fq.gz
PRJNA656389	SAMN15871102	ABCN20	Bubalus bubalis digestive tract metagenome	WGS	METAGENOMIC	PCR	paired	ILLUMINA	Illumina NovaSeq 6000	Whole metagenomic sequencing	fastq	ABCN20_R1.fq.gz	ABCN20_R2.fq.gz
PRJNA656389	SAMN15871103	ABCN21	Bubalus bubalis digestive tract metagenome	WGS	METAGENOMIC	PCR	paired	ILLUMINA	Illumina NovaSeq 6000	Whole metagenomic sequencing	fastq	ABCN21_R1.fq.gz	ABCN21_R2.fq.gz
PRJNA656389	SAMN15871104	ABCN22	Bubalus bubalis digestive tract metagenome	WGS	METAGENOMIC	PCR	paired	ILLUMINA	Illumina NovaSeq 6000	Whole metagenomic sequencing	fastq	ABCN22_R1.fq.gz	ABCN22_R2.fq.gz
PRJNA656389	SAMN15871105	ABCN23	Bubalus bubalis digestive tract metagenome	WGS	METAGENOMIC	PCR	paired	ILLUMINA	Illumina NovaSeq 6000	Whole metagenomic sequencing	fastq	ABCN23_R1.fq.gz	ABCN23_R2.fq.gz
PRJNA656389	SAMN15871106	ABCN24	Bubalus bubalis digestive tract metagenome	WGS	METAGENOMIC	PCR	paired	ILLUMINA	Illumina NovaSeq 6000	Whole metagenomic sequencing	fastq	ABCN24_R1.fq.gz	ABCN24_R2.fq.gz
PRJNA656389	SAMN15871107	ABCN25	Bubalus bubalis digestive tract metagenome	WGS	METAGENOMIC	PCR	paired	ILLUMINA	Illumina NovaSeq 6000	Whole metagenomic sequencing	fastq	ABCN25_R1.fq.gz	ABCN25_R2.fq.gz
PRJNA656389	SAMN15871108	ABCN26	Bubalus bubalis digestive tract metagenome	WGS	METAGENOMIC	PCR	paired	ILLUMINA	Illumina NovaSeq 6000	Whole metagenomic sequencing	fastq	ABCN26_R1.fq.gz	ABCN26_R2.fq.gz
PRJNA656389	SAMN15871109	ABCN27	Bubalus bubalis digestive tract metagenome	WGS	METAGENOMIC	PCR	paired	ILLUMINA	Illumina NovaSeq 6000	Whole metagenomic sequencing	fastq	ABCN27_R1.fq.gz	ABCN27_R2.fq.gz
PRJNA656389	SAMN15871110	ABCN28	Bubalus bubalis digestive tract metagenome	WGS	METAGENOMIC	PCR	paired	ILLUMINA	Illumina NovaSeq 6000	Whole metagenomic sequencing	fastq	ABCN28_R1.fq.gz	ABCN28_R2.fq.gz
PRJNA656389	SAMN15871111	ABCN29	Bubalus bubalis digestive tract metagenome	WGS	METAGENOMIC	PCR	paired	ILLUMINA	Illumina NovaSeq 6000	Whole metagenomic sequencing	fastq	ABCN29_R1.fq.gz	ABCN29_R2.fq.gz
PRJNA656389	SAMN15871112	ABCN3	Bubalus bubalis digestive tract metagenome	WGS	METAGENOMIC	PCR	paired	ILLUMINA	Illumina NovaSeq 6000	Whole metagenomic sequencing	fastq	ABCN3_R1.fq.gz	ABCN3_R2.fq.gz
PRJNA656389	SAMN15871113	ABCN30	Bubalus bubalis digestive tract metagenome	WGS	METAGENOMIC	PCR	paired	ILLUMINA	Illumina NovaSeq 6000	Whole metagenomic sequencing	fastq	ABCN30_R1.fq.gz	ABCN30_R2.fq.gz
PRJNA656389	SAMN15871114	ABCN31	Bubalus bubalis digestive tract metagenome	WGS	METAGENOMIC	PCR	paired	ILLUMINA	Illumina NovaSeq 6000	Whole metagenomic sequencing	fastq	ABCN31_R1.fq.gz	ABCN31_R2.fq.gz
PRJNA656389	SAMN15871115	ABCN32	Bubalus bubalis digestive tract metagenome	WGS	METAGENOMIC	PCR	paired	ILLUMINA	Illumina NovaSeq 6000	Whole metagenomic sequencing	fastq	ABCN32_R1.fq.gz	ABCN32_R2.fq.gz
PRJNA656389	SAMN15871116	ABCN33	Bubalus bubalis digestive tract metagenome	WGS	METAGENOMIC	PCR	paired	ILLUMINA	Illumina NovaSeq 6000	Whole metagenomic sequencing	fastq	ABCN33_R1.fq.gz	ABCN33_R2.fq.gz
PRJNA656389	SAMN15871117	ABCN4	Bubalus bubalis digestive tract metagenome	WGS	METAGENOMIC	PCR	paired	ILLUMINA	Illumina NovaSeq 6000	Whole metagenomic sequencing	fastq	ABCN4_R1.fq.gz	ABCN4_R2.fq.gz
PRJNA656389	SAMN15871118	ABCN5	Bubalus bubalis digestive tract metagenome	WGS	METAGENOMIC	PCR	paired	ILLUMINA	Illumina NovaSeq 6000	Whole metagenomic sequencing	fastq	ABCN5_R1.fq.gz	ABCN5_R2.fq.gz
PRJNA656389	SAMN15871119	ABCN6	Bubalus bubalis digestive tract metagenome	WGS	METAGENOMIC	PCR	paired	ILLUMINA	Illumina NovaSeq 6000	Whole metagenomic sequencing	fastq	ABCN6_R1.fq.gz	ABCN6_R2.fq.gz
PRJNA656389	SAMN15871120	ABCN7	Bubalus bubalis digestive tract metagenome	WGS	METAGENOMIC	PCR	paired	ILLUMINA	Illumina NovaSeq 6000	Whole metagenomic sequencing	fastq	ABCN7_R1.fq.gz	ABCN7_R2.fq.gz
PRJNA656389	SAMN15871121	ABCN8	Bubalus bubalis digestive tract metagenome	WGS	METAGENOMIC	PCR	paired	ILLUMINA	Illumina NovaSeq 6000	Whole metagenomic sequencing	fastq	ABCN8_R1.fq.gz	ABCN8_R2.fq.gz
PRJNA656389	SAMN15871122	ABCN9	Bubalus bubalis digestive tract metagenome	WGS	METAGENOMIC	PCR	paired	ILLUMINA	Illumina NovaSeq 6000	Whole metagenomic sequencing	fastq	ABCN9_R1.fq.gz	ABCN9_R2.fq.gz
PRJNA656389	SAMN15871123	ABDN1	Bubalus bubalis digestive tract metagenome	WGS	METAGENOMIC	PCR	paired	ILLUMINA	Illumina NovaSeq 6000	Whole metagenomic sequencing	fastq	ABDN1_R1.fq.gz	ABDN1_R2.fq.gz
PRJNA656389	SAMN15871124	ABGD10	Bubalus bubalis digestive tract metagenome	WGS	METAGENOMIC	PCR	paired	ILLUMINA	Illumina NovaSeq 6000	Whole metagenomic sequencing	fastq	ABGD10_R1.fq.gz	ABGD10_R2.fq.gz
PRJNA656389	SAMN15871125	ABGD11	Bubalus bubalis digestive tract metagenome	WGS	METAGENOMIC	PCR	paired	ILLUMINA	Illumina NovaSeq 6000	Whole metagenomic sequencing	fastq	ABGD11_R1.fq.gz	ABGD11_R2.fq.gz
PRJNA656389	SAMN15871126	ABGD2	Bubalus bubalis digestive tract metagenome	WGS	METAGENOMIC	PCR	paired	ILLUMINA	Illumina NovaSeq 6000	Whole metagenomic sequencing	fastq	ABGD2_R1.fq.gz	ABGD2_R2.fq.gz
PRJNA656389	SAMN15871127	ABGD3	Bubalus bubalis digestive tract metagenome	WGS	METAGENOMIC	PCR	paired	ILLUMINA	Illumina NovaSeq 6000	Whole metagenomic sequencing	fastq	ABGD3_R1.fq.gz	ABGD3_R2.fq.gz
PRJNA656389	SAMN15871128	ABGD4	Bubalus bubalis digestive tract metagenome	WGS	METAGENOMIC	PCR	paired	ILLUMINA	Illumina NovaSeq 6000	Whole metagenomic sequencing	fastq	ABGD4_R1.fq.gz	ABGD4_R2.fq.gz
PRJNA656389	SAMN15871129	ABGD5	Bubalus bubalis digestive tract metagenome	WGS	METAGENOMIC	PCR	paired	ILLUMINA	Illumina NovaSeq 6000	Whole metagenomic sequencing	fastq	ABGD5_R1.fq.gz	ABGD5_R2.fq.gz
PRJNA656389	SAMN15871130	ABGD6	Bubalus bubalis digestive tract metagenome	WGS	METAGENOMIC	PCR	paired	ILLUMINA	Illumina NovaSeq 6000	Whole metagenomic sequencing	fastq	ABGD6_R1.fq.gz	ABGD6_R2.fq.gz
PRJNA656389	SAMN15871131	ABGD7	Bubalus bubalis digestive tract metagenome	WGS	METAGENOMIC	PCR	paired	ILLUMINA	Illumina NovaSeq 6000	Whole metagenomic sequencing	fastq	ABGD7_R1.fq.gz	ABGD7_R2.fq.gz
PRJNA656389	SAMN15871132	ABGD8	Bubalus bubalis digestive tract metagenome	WGS	METAGENOMIC	PCR	paired	ILLUMINA	Illumina NovaSeq 6000	Whole metagenomic sequencing	fastq	ABGD8_R1.fq.gz	ABGD8_R2.fq.gz
PRJNA656389	SAMN15871133	ABGD9	Bubalus bubalis digestive tract metagenome	WGS	METAGENOMIC	PCR	paired	ILLUMINA	Illumina NovaSeq 6000	Whole metagenomic sequencing	fastq	ABGD9_R1.fq.gz	ABGD9_R2.fq.gz
PRJNA656389	SAMN15871134	BLJ1	Bubalus bubalis digestive tract metagenome	WGS	METAGENOMIC	PCR	paired	ILLUMINA	Illumina NovaSeq 6000	Whole metagenomic sequencing	fastq	BLJ1_R1.fq.gz	BLJ1_R2.fq.gz
PRJNA656389	SAMN15871135	BLJ10	Bubalus bubalis digestive tract metagenome	WGS	METAGENOMIC	PCR	paired	ILLUMINA	Illumina NovaSeq 6000	Whole metagenomic sequencing	fastq	BLJ10_R1.fq.gz	BLJ10_R2.fq.gz
PRJNA656389	SAMN15871136	BLJ11	Bubalus bubalis digestive tract metagenome	WGS	METAGENOMIC	PCR	paired	ILLUMINA	Illumina NovaSeq 6000	Whole metagenomic sequencing	fastq	BLJ11_R1.fq.gz	BLJ11_R2.fq.gz
PRJNA656389	SAMN15871137	BLJ12	Bubalus bubalis digestive tract metagenome	WGS	METAGENOMIC	PCR	paired	ILLUMINA	Illumina NovaSeq 6000	Whole metagenomic sequencing	fastq	BLJ12_R1.fq.gz	BLJ12_R2.fq.gz
PRJNA656389	SAMN15871138	BLJ13	Bubalus bubalis digestive tract metagenome	WGS	METAGENOMIC	PCR	paired	ILLUMINA	Illumina NovaSeq 6000	Whole metagenomic sequencing	fastq	BLJ13_R1.fq.gz	BLJ13_R2.fq.gz
PRJNA656389	SAMN15871139	BLJ14	Bubalus bubalis digestive tract metagenome	WGS	METAGENOMIC	PCR	paired	ILLUMINA	Illumina NovaSeq 6000	Whole metagenomic sequencing	fastq	BLJ14_R1.fq.gz	BLJ14_R2.fq.gz
PRJNA656389	SAMN15871140	BLJ15	Bubalus bubalis digestive tract metagenome	WGS	METAGENOMIC	PCR	paired	ILLUMINA	Illumina NovaSeq 6000	Whole metagenomic sequencing	fastq	BLJ15_R1.fq.gz	BLJ15_R2.fq.gz
PRJNA656389	SAMN15871141	BLJ16	Bubalus bubalis digestive tract metagenome	WGS	METAGENOMIC	PCR	paired	ILLUMINA	Illumina NovaSeq 6000	Whole metagenomic sequencing	fastq	BLJ16_R1.fq.gz	BLJ16_R2.fq.gz
PRJNA656389	SAMN15871142	BLJ17	Bubalus bubalis digestive tract metagenome	WGS	METAGENOMIC	PCR	paired	ILLUMINA	Illumina NovaSeq 6000	Whole metagenomic sequencing	fastq	BLJ17_R1.fq.gz	BLJ17_R2.fq.gz
PRJNA656389	SAMN15871143	BLJ18	Bubalus bubalis digestive tract metagenome	WGS	METAGENOMIC	PCR	paired	ILLUMINA	Illumina NovaSeq 6000	Whole metagenomic sequencing	fastq	BLJ18_R1.fq.gz	BLJ18_R2.fq.gz
PRJNA656389	SAMN15871144	BLJ19	Bubalus bubalis digestive tract metagenome	WGS	METAGENOMIC	PCR	paired	ILLUMINA	Illumina NovaSeq 6000	Whole metagenomic sequencing	fastq	BLJ19_R1.fq.gz	BLJ19_R2.fq.gz
PRJNA656389	SAMN15871145	BLJ20	Bubalus bubalis digestive tract metagenome	WGS	METAGENOMIC	PCR	paired	ILLUMINA	Illumina NovaSeq 6000	Whole metagenomic sequencing	fastq	BLJ20_R1.fq.gz	BLJ20_R2.fq.gz
PRJNA656389	SAMN15871146	BLJ21	Bubalus bubalis digestive tract metagenome	WGS	METAGENOMIC	PCR	paired	ILLUMINA	Illumina NovaSeq 6000	Whole metagenomic sequencing	fastq	BLJ21_R1.fq.gz	BLJ21_R2.fq.gz
PRJNA656389	SAMN15871147	BLJ22	Bubalus bubalis digestive tract metagenome	WGS	METAGENOMIC	PCR	paired	ILLUMINA	Illumina NovaSeq 6000	Whole metagenomic sequencing	fastq	BLJ22_R1.fq.gz	BLJ22_R2.fq.gz
PRJNA656389	SAMN15871148	BLJ23	Bubalus bubalis digestive tract metagenome	WGS	METAGENOMIC	PCR	paired	ILLUMINA	Illumina NovaSeq 6000	Whole metagenomic sequencing	fastq	BLJ23_R1.fq.gz	BLJ23_R2.fq.gz
PRJNA656389	SAMN15871149	BLJ24	Bubalus bubalis digestive tract metagenome	WGS	METAGENOMIC	PCR	paired	ILLUMINA	Illumina NovaSeq 6000	Whole metagenomic sequencing	fastq	BLJ24_R1.fq.gz	BLJ24_R2.fq.gz
PRJNA656389	SAMN15871150	BLJ25	Bubalus bubalis digestive tract metagenome	WGS	METAGENOMIC	PCR	paired	ILLUMINA	Illumina NovaSeq 6000	Whole metagenomic sequencing	fastq	BLJ25_R1.fq.gz	BLJ25_R2.fq.gz
PRJNA656389	SAMN15871151	BLJ26	Bubalus bubalis digestive tract metagenome	WGS	METAGENOMIC	PCR	paired	ILLUMINA	Illumina NovaSeq 6000	Whole metagenomic sequencing	fastq	BLJ26_R1.fq.gz	BLJ26_R2.fq.gz
PRJNA656389	SAMN15871152	BLJ27	Bubalus bubalis digestive tract metagenome	WGS	METAGENOMIC	PCR	paired	ILLUMINA	Illumina NovaSeq 6000	Whole metagenomic sequencing	fastq	BLJ27_R1.fq.gz	BLJ27_R2.fq.gz
PRJNA656389	SAMN15871153	BLJ28	Bubalus bubalis digestive tract metagenome	WGS	METAGENOMIC	PCR	paired	ILLUMINA	Illumina NovaSeq 6000	Whole metagenomic sequencing	fastq	BLJ28_R1.fq.gz	BLJ28_R2.fq.gz
PRJNA656389	SAMN15871154	BLJ29	Bubalus bubalis digestive tract metagenome	WGS	METAGENOMIC	PCR	paired	ILLUMINA	Illumina NovaSeq 6000	Whole metagenomic sequencing	fastq	BLJ29_R1.fq.gz	BLJ29_R2.fq.gz
PRJNA656389	SAMN15871155	BLJ30	Bubalus bubalis digestive tract metagenome	WGS	METAGENOMIC	PCR	paired	ILLUMINA	Illumina NovaSeq 6000	Whole metagenomic sequencing	fastq	BLJ30_R1.fq.gz	BLJ30_R2.fq.gz
PRJNA656389	SAMN15871156	BLJ31	Bubalus bubalis digestive tract metagenome	WGS	METAGENOMIC	PCR	paired	ILLUMINA	Illumina NovaSeq 6000	Whole metagenomic sequencing	fastq	BLJ31_R1.fq.gz	BLJ31_R2.fq.gz
PRJNA656389	SAMN15871157	BLJ32	Bubalus bubalis digestive tract metagenome	WGS	METAGENOMIC	PCR	paired	ILLUMINA	Illumina NovaSeq 6000	Whole metagenomic sequencing	fastq	BLJ32_R1.fq.gz	BLJ32_R2.fq.gz
PRJNA656389	SAMN15871158	BLJ33	Bubalus bubalis digestive tract metagenome	WGS	METAGENOMIC	PCR	paired	ILLUMINA	Illumina NovaSeq 6000	Whole metagenomic sequencing	fastq	BLJ33_R1.fq.gz	BLJ33_R2.fq.gz
PRJNA656389	SAMN15871159	BLJ35	Bubalus bubalis digestive tract metagenome	WGS	METAGENOMIC	PCR	paired	ILLUMINA	Illumina NovaSeq 6000	Whole metagenomic sequencing	fastq	BLJ35_R1.fq.gz	BLJ35_R2.fq.gz
PRJNA656389	SAMN15871160	BLJ5	Bubalus bubalis digestive tract metagenome	WGS	METAGENOMIC	PCR	paired	ILLUMINA	Illumina NovaSeq 6000	Whole metagenomic sequencing	fastq	BLJ5_R1.fq.gz	BLJ5_R2.fq.gz
PRJNA656389	SAMN15871161	BLJ6	Bubalus bubalis digestive tract metagenome	WGS	METAGENOMIC	PCR	paired	ILLUMINA	Illumina NovaSeq 6000	Whole metagenomic sequencing	fastq	BLJ6_R1.fq.gz	BLJ6_R2.fq.gz
PRJNA656389	SAMN15871162	BLJ7	Bubalus bubalis digestive tract metagenome	WGS	METAGENOMIC	PCR	paired	ILLUMINA	Illumina NovaSeq 6000	Whole metagenomic sequencing	fastq	BLJ7_R1.fq.gz	BLJ7_R2.fq.gz
PRJNA656389	SAMN15871163	BLJ8	Bubalus bubalis digestive tract metagenome	WGS	METAGENOMIC	PCR	paired	ILLUMINA	Illumina NovaSeq 6000	Whole metagenomic sequencing	fastq	BLJ8_R1.fq.gz	BLJ8_R2.fq.gz
PRJNA656389	SAMN15871164	BLJ9	Bubalus bubalis digestive tract metagenome	WGS	METAGENOMIC	PCR	paired	ILLUMINA	Illumina NovaSeq 6000	Whole metagenomic sequencing	fastq	BLJ9_R1.fq.gz	BLJ9_R2.fq.gz
PRJNA656389	SAMN15871165	MCN14	Bubalus bubalis digestive tract metagenome	WGS	METAGENOMIC	PCR	paired	ILLUMINA	Illumina NovaSeq 6000	Whole metagenomic sequencing	fastq	MCN14_R1.fq.gz	MCN14_R2.fq.gz
PRJNA656389	SAMN15871166	MCN15	Bubalus bubalis digestive tract metagenome	WGS	METAGENOMIC	PCR	paired	ILLUMINA	Illumina NovaSeq 6000	Whole metagenomic sequencing	fastq	MCN15_R1.fq.gz	MCN15_R2.fq.gz
PRJNA656389	SAMN15871167	MCN16	Bubalus bubalis digestive tract metagenome	WGS	METAGENOMIC	PCR	paired	ILLUMINA	Illumina NovaSeq 6000	Whole metagenomic sequencing	fastq	MCN16_R1.fq.gz	MCN16_R2.fq.gz
PRJNA656389	SAMN15871168	MCN17	Bubalus bubalis digestive tract metagenome	WGS	METAGENOMIC	PCR	paired	ILLUMINA	Illumina NovaSeq 6000	Whole metagenomic sequencing	fastq	MCN17_R1.fq.gz	MCN17_R2.fq.gz
PRJNA656389	SAMN15871169	MCN18	Bubalus bubalis digestive tract metagenome	WGS	METAGENOMIC	PCR	paired	ILLUMINA	Illumina NovaSeq 6000	Whole metagenomic sequencing	fastq	MCN18_R1.fq.gz	MCN18_R2.fq.gz
PRJNA656389	SAMN15871170	MCN19	Bubalus bubalis digestive tract metagenome	WGS	METAGENOMIC	PCR	paired	ILLUMINA	Illumina NovaSeq 6000	Whole metagenomic sequencing	fastq	MCN19_R1.fq.gz	MCN19_R2.fq.gz
PRJNA656389	SAMN15871171	MCN20	Bubalus bubalis digestive tract metagenome	WGS	METAGENOMIC	PCR	paired	ILLUMINA	Illumina NovaSeq 6000	Whole metagenomic sequencing	fastq	MCN20_R1.fq.gz	MCN20_R2.fq.gz
PRJNA656389	SAMN15871172	MCN21	Bubalus bubalis digestive tract metagenome	WGS	METAGENOMIC	PCR	paired	ILLUMINA	Illumina NovaSeq 6000	Whole metagenomic sequencing	fastq	MCN21_R1.fq.gz	MCN21_R2.fq.gz
PRJNA656389	SAMN15871173	MCN22	Bubalus bubalis digestive tract metagenome	WGS	METAGENOMIC	PCR	paired	ILLUMINA	Illumina NovaSeq 6000	Whole metagenomic sequencing	fastq	MCN22_R1.fq.gz	MCN22_R2.fq.gz
PRJNA656389	SAMN15871174	MCN23	Bubalus bubalis digestive tract metagenome	WGS	METAGENOMIC	PCR	paired	ILLUMINA	Illumina NovaSeq 6000	Whole metagenomic sequencing	fastq	MCN23_R1.fq.gz	MCN23_R2.fq.gz
PRJNA656389	SAMN15871175	MCN24	Bubalus bubalis digestive tract metagenome	WGS	METAGENOMIC	PCR	paired	ILLUMINA	Illumina NovaSeq 6000	Whole metagenomic sequencing	fastq	MCN24_R1.fq.gz	MCN24_R2.fq.gz
PRJNA656389	SAMN15871176	MCN26	Bubalus bubalis digestive tract metagenome	WGS	METAGENOMIC	PCR	paired	ILLUMINA	Illumina NovaSeq 6000	Whole metagenomic sequencing	fastq	MCN26_R1.fq.gz	MCN26_R2.fq.gz
PRJNA656389	SAMN15871177	MCN27	Bubalus bubalis digestive tract metagenome	WGS	METAGENOMIC	PCR	paired	ILLUMINA	Illumina NovaSeq 6000	Whole metagenomic sequencing	fastq	MCN27_R1.fq.gz	MCN27_R2.fq.gz
PRJNA656389	SAMN15871178	MCN28	Bubalus bubalis digestive tract metagenome	WGS	METAGENOMIC	PCR	paired	ILLUMINA	Illumina NovaSeq 6000	Whole metagenomic sequencing	fastq	MCN28_R1.fq.gz	MCN28_R2.fq.gz
PRJNA656389	SAMN15871179	MCN29	Bubalus bubalis digestive tract metagenome	WGS	METAGENOMIC	PCR	paired	ILLUMINA	Illumina NovaSeq 6000	Whole metagenomic sequencing	fastq	MCN29_R1.fq.gz	MCN29_R2.fq.gz
PRJNA656389	SAMN15871180	MCN30	Bubalus bubalis digestive tract metagenome	WGS	METAGENOMIC	PCR	paired	ILLUMINA	Illumina NovaSeq 6000	Whole metagenomic sequencing	fastq	MCN30_R1.fq.gz	MCN30_R2.fq.gz
PRJNA656389	SAMN15871181	MCN31	Bubalus bubalis digestive tract metagenome	WGS	METAGENOMIC	PCR	paired	ILLUMINA	Illumina NovaSeq 6000	Whole metagenomic sequencing	fastq	MCN31_R1.fq.gz	MCN31_R2.fq.gz
PRJNA656389	SAMN15871182	MCN32	Bubalus bubalis digestive tract metagenome	WGS	METAGENOMIC	PCR	paired	ILLUMINA	Illumina NovaSeq 6000	Whole metagenomic sequencing	fastq	MCN32_R1.fq.gz	MCN32_R2.fq.gz
PRJNA656389	SAMN15871183	MCN33	Bubalus bubalis digestive tract metagenome	WGS	METAGENOMIC	PCR	paired	ILLUMINA	Illumina NovaSeq 6000	Whole metagenomic sequencing	fastq	MCN33_R1.fq.gz	MCN33_R2.fq.gz
PRJNA656389	SAMN15871184	YCN20	Bubalus bubalis digestive tract metagenome	WGS	METAGENOMIC	PCR	paired	ILLUMINA	Illumina NovaSeq 6000	Whole metagenomic sequencing	fastq	YCN20_R1.fq.gz	YCN20_R2.fq.gz
PRJNA656389	SAMN15871185	YCN26	Bubalus bubalis digestive tract metagenome	WGS	METAGENOMIC	PCR	paired	ILLUMINA	Illumina NovaSeq 6000	Whole metagenomic sequencing	fastq	YCN26_R1.fq.gz	YCN26_R2.fq.gz
PRJNA656389	SAMN15871186	YCN4	Bubalus bubalis digestive tract metagenome	WGS	METAGENOMIC	PCR	paired	ILLUMINA	Illumina NovaSeq 6000	Whole metagenomic sequencing	fastq	YCN4_R1.fq.gz	YCN4_R2.fq.gz
PRJNA656389	SAMN15871187	YCN7	Bubalus bubalis digestive tract metagenome	WGS	METAGENOMIC	PCR	paired	ILLUMINA	Illumina NovaSeq 6000	Whole metagenomic sequencing	fastq	YCN7_R1.fq.gz	YCN7_R2.fq.gz
PRJNA656389	SAMN15871188	YCN8	Bubalus bubalis digestive tract metagenome	WGS	METAGENOMIC	PCR	paired	ILLUMINA	Illumina NovaSeq 6000	Whole metagenomic sequencing	fastq	YCN8_R1.fq.gz	YCN8_R2.fq.gz
PRJNA656389	SAMN15871189	MCN10	Bubalus bubalis digestive tract metagenome	WGS	METAGENOMIC	PCR	paired	ILLUMINA	Illumina NovaSeq 6000	Whole metagenomic sequencing	fastq	MCN10_R1.fq.gz	MCN10_R2.fq.gz
PRJNA656389	SAMN15871190	MCN11	Bubalus bubalis digestive tract metagenome	WGS	METAGENOMIC	PCR	paired	ILLUMINA	Illumina NovaSeq 6000	Whole metagenomic sequencing	fastq	MCN11_R1.fq.gz	MCN11_R2.fq.gz
PRJNA656389	SAMN15871191	MCN12	Bubalus bubalis digestive tract metagenome	WGS	METAGENOMIC	PCR	paired	ILLUMINA	Illumina NovaSeq 6000	Whole metagenomic sequencing	fastq	MCN12_R1.fq.gz	MCN12_R2.fq.gz
PRJNA656389	SAMN15871192	MCN13	Bubalus bubalis digestive tract metagenome	WGS	METAGENOMIC	PCR	paired	ILLUMINA	Illumina NovaSeq 6000	Whole metagenomic sequencing	fastq	MCN13_R1.fq.gz	MCN13_R2.fq.gz
PRJNA656389	SAMN15871193	MCN2	Bubalus bubalis digestive tract metagenome	WGS	METAGENOMIC	PCR	paired	ILLUMINA	Illumina NovaSeq 6000	Whole metagenomic sequencing	fastq	MCN2_R1.fq.gz	MCN2_R2.fq.gz
PRJNA656389	SAMN15871194	MCN3	Bubalus bubalis digestive tract metagenome	WGS	METAGENOMIC	PCR	paired	ILLUMINA	Illumina NovaSeq 6000	Whole metagenomic sequencing	fastq	MCN3_R1.fq.gz	MCN3_R2.fq.gz
PRJNA656389	SAMN15871195	MCN35	Bubalus bubalis digestive tract metagenome	WGS	METAGENOMIC	PCR	paired	ILLUMINA	Illumina NovaSeq 6000	Whole metagenomic sequencing	fastq	MCN35_R1.fq.gz	MCN35_R2.fq.gz
PRJNA656389	SAMN15871196	MCN4	Bubalus bubalis digestive tract metagenome	WGS	METAGENOMIC	PCR	paired	ILLUMINA	Illumina NovaSeq 6000	Whole metagenomic sequencing	fastq	MCN4_R1.fq.gz	MCN4_R2.fq.gz
PRJNA656389	SAMN15871197	MCN5	Bubalus bubalis digestive tract metagenome	WGS	METAGENOMIC	PCR	paired	ILLUMINA	Illumina NovaSeq 6000	Whole metagenomic sequencing	fastq	MCN5_R1.fq.gz	MCN5_R2.fq.gz
PRJNA656389	SAMN15871198	MCN6	Bubalus bubalis digestive tract metagenome	WGS	METAGENOMIC	PCR	paired	ILLUMINA	Illumina NovaSeq 6000	Whole metagenomic sequencing	fastq	MCN6_R1.fq.gz	MCN6_R2.fq.gz
PRJNA656389	SAMN15871199	MCN7	Bubalus bubalis digestive tract metagenome	WGS	METAGENOMIC	PCR	paired	ILLUMINA	Illumina NovaSeq 6000	Whole metagenomic sequencing	fastq	MCN7_R1.fq.gz	MCN7_R2.fq.gz
PRJNA656389	SAMN15871200	MCN8	Bubalus bubalis digestive tract metagenome	WGS	METAGENOMIC	PCR	paired	ILLUMINA	Illumina NovaSeq 6000	Whole metagenomic sequencing	fastq	MCN8_R1.fq.gz	MCN8_R2.fq.gz
PRJNA656389	SAMN15871201	YCN10	Bubalus bubalis digestive tract metagenome	WGS	METAGENOMIC	PCR	paired	ILLUMINA	Illumina NovaSeq 6000	Whole metagenomic sequencing	fastq	YCN10_R1.fq.gz	YCN10_R2.fq.gz
PRJNA656389	SAMN15871202	YCN11	Bubalus bubalis digestive tract metagenome	WGS	METAGENOMIC	PCR	paired	ILLUMINA	Illumina NovaSeq 6000	Whole metagenomic sequencing	fastq	YCN11_R1.fq.gz	YCN11_R2.fq.gz
PRJNA656389	SAMN15871203	YCN12	Bubalus bubalis digestive tract metagenome	WGS	METAGENOMIC	PCR	paired	ILLUMINA	Illumina NovaSeq 6000	Whole metagenomic sequencing	fastq	YCN12_R1.fq.gz	YCN12_R2.fq.gz
PRJNA656389	SAMN15871204	YCN14	Bubalus bubalis digestive tract metagenome	WGS	METAGENOMIC	PCR	paired	ILLUMINA	Illumina NovaSeq 6000	Whole metagenomic sequencing	fastq	YCN14_R1.fq.gz	YCN14_R2.fq.gz
PRJNA656389	SAMN15871205	YCN15	Bubalus bubalis digestive tract metagenome	WGS	METAGENOMIC	PCR	paired	ILLUMINA	Illumina NovaSeq 6000	Whole metagenomic sequencing	fastq	YCN15_R1.fq.gz	YCN15_R2.fq.gz
PRJNA656389	SAMN15871206	YCN16	Bubalus bubalis digestive tract metagenome	WGS	METAGENOMIC	PCR	paired	ILLUMINA	Illumina NovaSeq 6000	Whole metagenomic sequencing	fastq	YCN16_R1.fq.gz	YCN16_R2.fq.gz
PRJNA656389	SAMN15871207	YCN17	Bubalus bubalis digestive tract metagenome	WGS	METAGENOMIC	PCR	paired	ILLUMINA	Illumina NovaSeq 6000	Whole metagenomic sequencing	fastq	YCN17_R1.fq.gz	YCN17_R2.fq.gz
PRJNA656389	SAMN15871208	YCN18	Bubalus bubalis digestive tract metagenome	WGS	METAGENOMIC	PCR	paired	ILLUMINA	Illumina NovaSeq 6000	Whole metagenomic sequencing	fastq	YCN18_R1.fq.gz	YCN18_R2.fq.gz
PRJNA656389	SAMN15871209	YCN19	Bubalus bubalis digestive tract metagenome	WGS	METAGENOMIC	PCR	paired	ILLUMINA	Illumina NovaSeq 6000	Whole metagenomic sequencing	fastq	YCN19_R1.fq.gz	YCN19_R2.fq.gz
PRJNA656389	SAMN15871210	YCN21	Bubalus bubalis digestive tract metagenome	WGS	METAGENOMIC	PCR	paired	ILLUMINA	Illumina NovaSeq 6000	Whole metagenomic sequencing	fastq	YCN21_R1.fq.gz	YCN21_R2.fq.gz
PRJNA656389	SAMN15871211	YCN22	Bubalus bubalis digestive tract metagenome	WGS	METAGENOMIC	PCR	paired	ILLUMINA	Illumina NovaSeq 6000	Whole metagenomic sequencing	fastq	YCN22_R1.fq.gz	YCN22_R2.fq.gz
PRJNA656389	SAMN15871212	YCN23	Bubalus bubalis digestive tract metagenome	WGS	METAGENOMIC	PCR	paired	ILLUMINA	Illumina NovaSeq 6000	Whole metagenomic sequencing	fastq	YCN23_R1.fq.gz	YCN23_R2.fq.gz
PRJNA656389	SAMN15871213	YCN24	Bubalus bubalis digestive tract metagenome	WGS	METAGENOMIC	PCR	paired	ILLUMINA	Illumina NovaSeq 6000	Whole metagenomic sequencing	fastq	YCN24_R1.fq.gz	YCN24_R2.fq.gz
PRJNA656389	SAMN15871214	YCN25	Bubalus bubalis digestive tract metagenome	WGS	METAGENOMIC	PCR	paired	ILLUMINA	Illumina NovaSeq 6000	Whole metagenomic sequencing	fastq	YCN25_R1.fq.gz	YCN25_R2.fq.gz
PRJNA656389	SAMN15871215	YCN27	Bubalus bubalis digestive tract metagenome	WGS	METAGENOMIC	PCR	paired	ILLUMINA	Illumina NovaSeq 6000	Whole metagenomic sequencing	fastq	YCN27_R1.fq.gz	YCN27_R2.fq.gz
PRJNA656389	SAMN15871216	YCN28	Bubalus bubalis digestive tract metagenome	WGS	METAGENOMIC	PCR	paired	ILLUMINA	Illumina NovaSeq 6000	Whole metagenomic sequencing	fastq	YCN28_R1.fq.gz	YCN28_R2.fq.gz
PRJNA656389	SAMN15871217	YCN29	Bubalus bubalis digestive tract metagenome	WGS	METAGENOMIC	PCR	paired	ILLUMINA	Illumina NovaSeq 6000	Whole metagenomic sequencing	fastq	YCN29_R1.fq.gz	YCN29_R2.fq.gz
PRJNA656389	SAMN15871218	YCN30	Bubalus bubalis digestive tract metagenome	WGS	METAGENOMIC	PCR	paired	ILLUMINA	Illumina NovaSeq 6000	Whole metagenomic sequencing	fastq	YCN30_R1.fq.gz	YCN30_R2.fq.gz
PRJNA656389	SAMN15871219	YCN31	Bubalus bubalis digestive tract metagenome	WGS	METAGENOMIC	PCR	paired	ILLUMINA	Illumina NovaSeq 6000	Whole metagenomic sequencing	fastq	YCN31_R1.fq.gz	YCN31_R2.fq.gz
PRJNA656389	SAMN15871220	YCN32	Bubalus bubalis digestive tract metagenome	WGS	METAGENOMIC	PCR	paired	ILLUMINA	Illumina NovaSeq 6000	Whole metagenomic sequencing	fastq	YCN32_R1.fq.gz	YCN32_R2.fq.gz
PRJNA656389	SAMN15871221	YCN33	Bubalus bubalis digestive tract metagenome	WGS	METAGENOMIC	PCR	paired	ILLUMINA	Illumina NovaSeq 6000	Whole metagenomic sequencing	fastq	YCN33_R1.fq.gz	YCN33_R2.fq.gz
PRJNA656389	SAMN15871222	YCN34	Bubalus bubalis digestive tract metagenome	WGS	METAGENOMIC	PCR	paired	ILLUMINA	Illumina NovaSeq 6000	Whole metagenomic sequencing	fastq	YCN34_R1.fq.gz	YCN34_R2.fq.gz
PRJNA656389	SAMN15871223	YCN35	Bubalus bubalis digestive tract metagenome	WGS	METAGENOMIC	PCR	paired	ILLUMINA	Illumina NovaSeq 6000	Whole metagenomic sequencing	fastq	YCN35_R1.fq.gz	YCN35_R2.fq.gz
PRJNA656389	SAMN15871224	YCN5	Bubalus bubalis digestive tract metagenome	WGS	METAGENOMIC	PCR	paired	ILLUMINA	Illumina NovaSeq 6000	Whole metagenomic sequencing	fastq	YCN5_R1.fq.gz	YCN5_R2.fq.gz
PRJNA656389	SAMN15871225	YCN6	Bubalus bubalis digestive tract metagenome	WGS	METAGENOMIC	PCR	paired	ILLUMINA	Illumina NovaSeq 6000	Whole metagenomic sequencing	fastq	YCN6_R1.fq.gz	YCN6_R2.fq.gz
PRJNA656389	SAMN15871226	YCN9	Bubalus bubalis digestive tract metagenome	WGS	METAGENOMIC	PCR	paired	ILLUMINA	Illumina NovaSeq 6000	Whole metagenomic sequencing	fastq	YCN9_R1.fq.gz	YCN9_R2.fq.gz
PRJNA656389	SAMN15871227	KCN10	Bubalus bubalis digestive tract metagenome	WGS	METAGENOMIC	PCR	paired	ILLUMINA	Illumina NovaSeq 6000	Whole metagenomic sequencing	fastq	KCN10_R1.fq.gz	KCN10_R2.fq.gz
PRJNA656389	SAMN15871228	KCN11	Bubalus bubalis digestive tract metagenome	WGS	METAGENOMIC	PCR	paired	ILLUMINA	Illumina NovaSeq 6000	Whole metagenomic sequencing	fastq	KCN11_R1.fq.gz	KCN11_R2.fq.gz
PRJNA656389	SAMN15871229	KCN12	Bubalus bubalis digestive tract metagenome	WGS	METAGENOMIC	PCR	paired	ILLUMINA	Illumina NovaSeq 6000	Whole metagenomic sequencing	fastq	KCN12_R1.fq.gz	KCN12_R2.fq.gz
PRJNA656389	SAMN15871230	KCN13	Bubalus bubalis digestive tract metagenome	WGS	METAGENOMIC	PCR	paired	ILLUMINA	Illumina NovaSeq 6000	Whole metagenomic sequencing	fastq	KCN13_R1.fq.gz	KCN13_R2.fq.gz
PRJNA656389	SAMN15871231	KCN15	Bubalus bubalis digestive tract metagenome	WGS	METAGENOMIC	PCR	paired	ILLUMINA	Illumina NovaSeq 6000	Whole metagenomic sequencing	fastq	KCN15_R1.fq.gz	KCN15_R2.fq.gz
PRJNA656389	SAMN15871232	KCN16	Bubalus bubalis digestive tract metagenome	WGS	METAGENOMIC	PCR	paired	ILLUMINA	Illumina NovaSeq 6000	Whole metagenomic sequencing	fastq	KCN16_R1.fq.gz	KCN16_R2.fq.gz
PRJNA656389	SAMN15871233	KCN17	Bubalus bubalis digestive tract metagenome	WGS	METAGENOMIC	PCR	paired	ILLUMINA	Illumina NovaSeq 6000	Whole metagenomic sequencing	fastq	KCN17_R1.fq.gz	KCN17_R2.fq.gz
PRJNA656389	SAMN15871234	KCN18	Bubalus bubalis digestive tract metagenome	WGS	METAGENOMIC	PCR	paired	ILLUMINA	Illumina NovaSeq 6000	Whole metagenomic sequencing	fastq	KCN18_R1.fq.gz	KCN18_R2.fq.gz
PRJNA656389	SAMN15871235	KCN19	Bubalus bubalis digestive tract metagenome	WGS	METAGENOMIC	PCR	paired	ILLUMINA	Illumina NovaSeq 6000	Whole metagenomic sequencing	fastq	KCN19_R1.fq.gz	KCN19_R2.fq.gz
PRJNA656389	SAMN15871236	KCN2	Bubalus bubalis digestive tract metagenome	WGS	METAGENOMIC	PCR	paired	ILLUMINA	Illumina NovaSeq 6000	Whole metagenomic sequencing	fastq	KCN2_R1.fq.gz	KCN2_R2.fq.gz
PRJNA656389	SAMN15871237	KCN20	Bubalus bubalis digestive tract metagenome	WGS	METAGENOMIC	PCR	paired	ILLUMINA	Illumina NovaSeq 6000	Whole metagenomic sequencing	fastq	KCN20_R1.fq.gz	KCN20_R2.fq.gz
PRJNA656389	SAMN15871238	KCN21	Bubalus bubalis digestive tract metagenome	WGS	METAGENOMIC	PCR	paired	ILLUMINA	Illumina NovaSeq 6000	Whole metagenomic sequencing	fastq	KCN21_R1.fq.gz	KCN21_R2.fq.gz
PRJNA656389	SAMN15871239	KCN22	Bubalus bubalis digestive tract metagenome	WGS	METAGENOMIC	PCR	paired	ILLUMINA	Illumina NovaSeq 6000	Whole metagenomic sequencing	fastq	KCN22_R1.fq.gz	KCN22_R2.fq.gz
PRJNA656389	SAMN15871240	KCN23	Bubalus bubalis digestive tract metagenome	WGS	METAGENOMIC	PCR	paired	ILLUMINA	Illumina NovaSeq 6000	Whole metagenomic sequencing	fastq	KCN23_R1.fq.gz	KCN23_R2.fq.gz
PRJNA656389	SAMN15871241	KCN25	Bubalus bubalis digestive tract metagenome	WGS	METAGENOMIC	PCR	paired	ILLUMINA	Illumina NovaSeq 6000	Whole metagenomic sequencing	fastq	KCN25_R1.fq.gz	KCN25_R2.fq.gz
PRJNA656389	SAMN15871242	KCN26	Bubalus bubalis digestive tract metagenome	WGS	METAGENOMIC	PCR	paired	ILLUMINA	Illumina NovaSeq 6000	Whole metagenomic sequencing	fastq	KCN26_R1.fq.gz	KCN26_R2.fq.gz
PRJNA656389	SAMN15871243	KCN29	Bubalus bubalis digestive tract metagenome	WGS	METAGENOMIC	PCR	paired	ILLUMINA	Illumina NovaSeq 6000	Whole metagenomic sequencing	fastq	KCN29_R1.fq.gz	KCN29_R2.fq.gz
PRJNA656389	SAMN15871244	KCN3	Bubalus bubalis digestive tract metagenome	WGS	METAGENOMIC	PCR	paired	ILLUMINA	Illumina NovaSeq 6000	Whole metagenomic sequencing	fastq	KCN3_R1.fq.gz	KCN3_R2.fq.gz
PRJNA656389	SAMN15871245	KCN30	Bubalus bubalis digestive tract metagenome	WGS	METAGENOMIC	PCR	paired	ILLUMINA	Illumina NovaSeq 6000	Whole metagenomic sequencing	fastq	KCN30_R1.fq.gz	KCN30_R2.fq.gz
PRJNA656389	SAMN15871246	KCN31	Bubalus bubalis digestive tract metagenome	WGS	METAGENOMIC	PCR	paired	ILLUMINA	Illumina NovaSeq 6000	Whole metagenomic sequencing	fastq	KCN31_R1.fq.gz	KCN31_R2.fq.gz
PRJNA656389	SAMN15871247	KCN32	Bubalus bubalis digestive tract metagenome	WGS	METAGENOMIC	PCR	paired	ILLUMINA	Illumina NovaSeq 6000	Whole metagenomic sequencing	fastq	KCN32_R1.fq.gz	KCN32_R2.fq.gz
PRJNA656389	SAMN15871248	KCN33	Bubalus bubalis digestive tract metagenome	WGS	METAGENOMIC	PCR	paired	ILLUMINA	Illumina NovaSeq 6000	Whole metagenomic sequencing	fastq	KCN33_R1.fq.gz	KCN33_R2.fq.gz
PRJNA656389	SAMN15871249	KCN35	Bubalus bubalis digestive tract metagenome	WGS	METAGENOMIC	PCR	paired	ILLUMINA	Illumina NovaSeq 6000	Whole metagenomic sequencing	fastq	KCN35_R1.fq.gz	KCN35_R2.fq.gz
PRJNA656389	SAMN15871250	KCN4	Bubalus bubalis digestive tract metagenome	WGS	METAGENOMIC	PCR	paired	ILLUMINA	Illumina NovaSeq 6000	Whole metagenomic sequencing	fastq	KCN4_R1.fq.gz	KCN4_R2.fq.gz
PRJNA656389	SAMN15871251	KCN5	Bubalus bubalis digestive tract metagenome	WGS	METAGENOMIC	PCR	paired	ILLUMINA	Illumina NovaSeq 6000	Whole metagenomic sequencing	fastq	KCN5_R1.fq.gz	KCN5_R2.fq.gz
PRJNA656389	SAMN15871252	KCN6	Bubalus bubalis digestive tract metagenome	WGS	METAGENOMIC	PCR	paired	ILLUMINA	Illumina NovaSeq 6000	Whole metagenomic sequencing	fastq	KCN6_R1.fq.gz	KCN6_R2.fq.gz
PRJNA656389	SAMN15871253	KCN7	Bubalus bubalis digestive tract metagenome	WGS	METAGENOMIC	PCR	paired	ILLUMINA	Illumina NovaSeq 6000	Whole metagenomic sequencing	fastq	KCN7_R1.fq.gz	KCN7_R2.fq.gz
PRJNA656389	SAMN15871254	KCN8	Bubalus bubalis digestive tract metagenome	WGS	METAGENOMIC	PCR	paired	ILLUMINA	Illumina NovaSeq 6000	Whole metagenomic sequencing	fastq	KCN8_R1.fq.gz	KCN8_R2.fq.gz
PRJNA656389	SAMN15871255	KCN14	Bubalus bubalis digestive tract metagenome	WGS	METAGENOMIC	PCR	paired	ILLUMINA	Illumina NovaSeq 6000	Whole metagenomic sequencing	fastq	KCN14_R1.fq.gz	KCN14_R2.fq.gz
PRJNA656389	SAMN15871256	KCN27	Bubalus bubalis digestive tract metagenome	WGS	METAGENOMIC	PCR	paired	ILLUMINA	Illumina NovaSeq 6000	Whole metagenomic sequencing	fastq	KCN27_R1.fq.gz	KCN27_R2.fq.gz
PRJNA656389	SAMN15871257	KCN9	Bubalus bubalis digestive tract metagenome	WGS	METAGENOMIC	PCR	paired	ILLUMINA	Illumina NovaSeq 6000	Whole metagenomic sequencing	fastq	KCN9_R1.fq.gz	KCN9_R2.fq.gz
PRJNA656389	SAMN15871258	M1	Bubalus bubalis digestive tract metagenome	WGS	METAGENOMIC	PCR	paired	ILLUMINA	Illumina NovaSeq 6000	Whole metagenomic sequencing	fastq	M1_R1.fq.gz	M1_R2.fq.gz
PRJNA656389	SAMN15871259	M2	Bubalus bubalis digestive tract metagenome	WGS	METAGENOMIC	PCR	paired	ILLUMINA	Illumina NovaSeq 6000	Whole metagenomic sequencing	fastq	M2_R1.fq.gz	M2_R2.fq.gz
PRJNA656389	SAMN15871260	M3	Bubalus bubalis digestive tract metagenome	WGS	METAGENOMIC	PCR	paired	ILLUMINA	Illumina NovaSeq 6000	Whole metagenomic sequencing	fastq	M3_R1.fq.gz	M3_R2.fq.gz
PRJNA656389	SAMN15871261	M5	Bubalus bubalis digestive tract metagenome	WGS	METAGENOMIC	PCR	paired	ILLUMINA	Illumina NovaSeq 6000	Whole metagenomic sequencing	fastq	M5_R1.fq.gz	M5_R2.fq.gz
PRJNA656389	SAMN15871262	M6	Bubalus bubalis digestive tract metagenome	WGS	METAGENOMIC	PCR	paired	ILLUMINA	Illumina NovaSeq 6000	Whole metagenomic sequencing	fastq	M6_R1.fq.gz	M6_R2.fq.gz
PRJNA656389	SAMN15871263	M7	Bubalus bubalis digestive tract metagenome	WGS	METAGENOMIC	PCR	paired	ILLUMINA	Illumina NovaSeq 6000	Whole metagenomic sequencing	fastq	M7_R1.fq.gz	M7_R2.fq.gz
PRJNA656389	SAMN15871264	M8	Bubalus bubalis digestive tract metagenome	WGS	METAGENOMIC	PCR	paired	ILLUMINA	Illumina NovaSeq 6000	Whole metagenomic sequencing	fastq	M8_R1.fq.gz	M8_R2.fq.gz
PRJNA656389	SAMN15871265	M9	Bubalus bubalis digestive tract metagenome	WGS	METAGENOMIC	PCR	paired	ILLUMINA	Illumina NovaSeq 6000	Whole metagenomic sequencing	fastq	M9_R1.fq.gz	M9_R2.fq.gz
PRJNA656389	SAMN15871266	M10	Bubalus bubalis digestive tract metagenome	WGS	METAGENOMIC	PCR	paired	ILLUMINA	Illumina NovaSeq 6000	Whole metagenomic sequencing	fastq	M10_R1.fq.gz	M10_R2.fq.gz
PRJNA656389	SAMN15871267	M11	Bubalus bubalis digestive tract metagenome	WGS	METAGENOMIC	PCR	paired	ILLUMINA	Illumina NovaSeq 6000	Whole metagenomic sequencing	fastq	M11_R1.fq.gz	M11_R2.fq.gz
PRJNA656389	SAMN15871268	M12	Bubalus bubalis digestive tract metagenome	WGS	METAGENOMIC	PCR	paired	ILLUMINA	Illumina NovaSeq 6000	Whole metagenomic sequencing	fastq	M12_R1.fq.gz	M12_R2.fq.gz
PRJNA656389	SAMN15871269	M14	Bubalus bubalis digestive tract metagenome	WGS	METAGENOMIC	PCR	paired	ILLUMINA	Illumina NovaSeq 6000	Whole metagenomic sequencing	fastq	M14_R1.fq.gz	M14_R2.fq.gz
PRJNA656389	SAMN15871270	M15	Bubalus bubalis digestive tract metagenome	WGS	METAGENOMIC	PCR	paired	ILLUMINA	Illumina NovaSeq 6000	Whole metagenomic sequencing	fastq	M15_R1.fq.gz	M15_R2.fq.gz
PRJNA656389	SAMN15871271	M16	Bubalus bubalis digestive tract metagenome	WGS	METAGENOMIC	PCR	paired	ILLUMINA	Illumina NovaSeq 6000	Whole metagenomic sequencing	fastq	M16_R1.fq.gz	M16_R2.fq.gz
PRJNA656389	SAMN15871272	M18	Bubalus bubalis digestive tract metagenome	WGS	METAGENOMIC	PCR	paired	ILLUMINA	Illumina NovaSeq 6000	Whole metagenomic sequencing	fastq	M18_R1.fq.gz	M18_R2.fq.gz
PRJNA656389	SAMN15871273	GFL1	Bubalus bubalis digestive tract metagenome	WGS	METAGENOMIC	PCR	paired	ILLUMINA	Illumina NovaSeq 6000	Whole metagenomic sequencing	fastq	GFL1_R1.fq.gz	GFL1_R2.fq.gz
PRJNA656389	SAMN15871274	NL10	Bubalus bubalis digestive tract metagenome	WGS	METAGENOMIC	PCR	paired	ILLUMINA	Illumina NovaSeq 6000	Whole metagenomic sequencing	fastq	NL10_R1.fq.gz	NL10_R2.fq.gz
PRJNA656389	SAMN15871275	NL12	Bubalus bubalis digestive tract metagenome	WGS	METAGENOMIC	PCR	paired	ILLUMINA	Illumina NovaSeq 6000	Whole metagenomic sequencing	fastq	NL12_R1.fq.gz	NL12_R2.fq.gz
PRJNA656389	SAMN15871276	NL13	Bubalus bubalis digestive tract metagenome	WGS	METAGENOMIC	PCR	paired	ILLUMINA	Illumina NovaSeq 6000	Whole metagenomic sequencing	fastq	NL13_R1.fq.gz	NL13_R2.fq.gz
PRJNA656389	SAMN15871277	NL15	Bubalus bubalis digestive tract metagenome	WGS	METAGENOMIC	PCR	paired	ILLUMINA	Illumina NovaSeq 6000	Whole metagenomic sequencing	fastq	NL15_R1.fq.gz	NL15_R2.fq.gz
PRJNA656389	SAMN15871278	NL16	Bubalus bubalis digestive tract metagenome	WGS	METAGENOMIC	PCR	paired	ILLUMINA	Illumina NovaSeq 6000	Whole metagenomic sequencing	fastq	NL16_R1.fq.gz	NL16_R2.fq.gz
PRJNA656389	SAMN15871279	NL17	Bubalus bubalis digestive tract metagenome	WGS	METAGENOMIC	PCR	paired	ILLUMINA	Illumina NovaSeq 6000	Whole metagenomic sequencing	fastq	NL17_R1.fq.gz	NL17_R2.fq.gz
PRJNA656389	SAMN15871280	NL18	Bubalus bubalis digestive tract metagenome	WGS	METAGENOMIC	PCR	paired	ILLUMINA	Illumina NovaSeq 6000	Whole metagenomic sequencing	fastq	NL18_R1.fq.gz	NL18_R2.fq.gz
PRJNA656389	SAMN15871281	NL19	Bubalus bubalis digestive tract metagenome	WGS	METAGENOMIC	PCR	paired	ILLUMINA	Illumina NovaSeq 6000	Whole metagenomic sequencing	fastq	NL19_R1.fq.gz	NL19_R2.fq.gz
PRJNA656389	SAMN15871282	NL21	Bubalus bubalis digestive tract metagenome	WGS	METAGENOMIC	PCR	paired	ILLUMINA	Illumina NovaSeq 6000	Whole metagenomic sequencing	fastq	NL21_R1.fq.gz	NL21_R2.fq.gz
PRJNA656389	SAMN15871283	NL22	Bubalus bubalis digestive tract metagenome	WGS	METAGENOMIC	PCR	paired	ILLUMINA	Illumina NovaSeq 6000	Whole metagenomic sequencing	fastq	NL22_R1.fq.gz	NL22_R2.fq.gz
PRJNA656389	SAMN15871284	NL24	Bubalus bubalis digestive tract metagenome	WGS	METAGENOMIC	PCR	paired	ILLUMINA	Illumina NovaSeq 6000	Whole metagenomic sequencing	fastq	NL24_R1.fq.gz	NL24_R2.fq.gz
PRJNA656389	SAMN15871285	NL25	Bubalus bubalis digestive tract metagenome	WGS	METAGENOMIC	PCR	paired	ILLUMINA	Illumina NovaSeq 6000	Whole metagenomic sequencing	fastq	NL25_R1.fq.gz	NL25_R2.fq.gz
PRJNA656389	SAMN15871286	NL26	Bubalus bubalis digestive tract metagenome	WGS	METAGENOMIC	PCR	paired	ILLUMINA	Illumina NovaSeq 6000	Whole metagenomic sequencing	fastq	NL26_R1.fq.gz	NL26_R2.fq.gz
PRJNA656389	SAMN15871287	NL27	Bubalus bubalis digestive tract metagenome	WGS	METAGENOMIC	PCR	paired	ILLUMINA	Illumina NovaSeq 6000	Whole metagenomic sequencing	fastq	NL27_R1.fq.gz	NL27_R2.fq.gz
PRJNA656389	SAMN15871288	NL28	Bubalus bubalis digestive tract metagenome	WGS	METAGENOMIC	PCR	paired	ILLUMINA	Illumina NovaSeq 6000	Whole metagenomic sequencing	fastq	NL28_R1.fq.gz	NL28_R2.fq.gz
PRJNA656389	SAMN15871289	NL29	Bubalus bubalis digestive tract metagenome	WGS	METAGENOMIC	PCR	paired	ILLUMINA	Illumina NovaSeq 6000	Whole metagenomic sequencing	fastq	NL29_R1.fq.gz	NL29_R2.fq.gz
PRJNA656389	SAMN15871290	NL31	Bubalus bubalis digestive tract metagenome	WGS	METAGENOMIC	PCR	paired	ILLUMINA	Illumina NovaSeq 6000	Whole metagenomic sequencing	fastq	NL31_R1.fq.gz	NL31_R2.fq.gz
PRJNA656389	SAMN15871291	NL32	Bubalus bubalis digestive tract metagenome	WGS	METAGENOMIC	PCR	paired	ILLUMINA	Illumina NovaSeq 6000	Whole metagenomic sequencing	fastq	NL32_R1.fq.gz	NL32_R2.fq.gz
PRJNA656389	SAMN15871292	NL33	Bubalus bubalis digestive tract metagenome	WGS	METAGENOMIC	PCR	paired	ILLUMINA	Illumina NovaSeq 6000	Whole metagenomic sequencing	fastq	NL33_R1.fq.gz	NL33_R2.fq.gz
PRJNA656389	SAMN15871293	NL14	Bubalus bubalis digestive tract metagenome	WGS	METAGENOMIC	PCR	paired	ILLUMINA	Illumina NovaSeq 6000	Whole metagenomic sequencing	fastq	NL14_R1.fq.gz	NL14_R2.fq.gz
PRJNA656389	SAMN15871294	NL2	Bubalus bubalis digestive tract metagenome	WGS	METAGENOMIC	PCR	paired	ILLUMINA	Illumina NovaSeq 6000	Whole metagenomic sequencing	fastq	NL2_R1.fq.gz	NL2_R2.fq.gz
PRJNA656389	SAMN15871295	NL3	Bubalus bubalis digestive tract metagenome	WGS	METAGENOMIC	PCR	paired	ILLUMINA	Illumina NovaSeq 6000	Whole metagenomic sequencing	fastq	NL3_R1.fq.gz	NL3_R2.fq.gz
PRJNA656389	SAMN15871296	NL35	Bubalus bubalis digestive tract metagenome	WGS	METAGENOMIC	PCR	paired	ILLUMINA	Illumina NovaSeq 6000	Whole metagenomic sequencing	fastq	NL35_R1.fq.gz	NL35_R2.fq.gz
PRJNA656389	SAMN15871297	NL4	Bubalus bubalis digestive tract metagenome	WGS	METAGENOMIC	PCR	paired	ILLUMINA	Illumina NovaSeq 6000	Whole metagenomic sequencing	fastq	NL4_R1.fq.gz	NL4_R2.fq.gz
PRJNA656389	SAMN15871298	NL5	Bubalus bubalis digestive tract metagenome	WGS	METAGENOMIC	PCR	paired	ILLUMINA	Illumina NovaSeq 6000	Whole metagenomic sequencing	fastq	NL5_R1.fq.gz	NL5_R2.fq.gz
PRJNA656389	SAMN15871299	NL7	Bubalus bubalis digestive tract metagenome	WGS	METAGENOMIC	PCR	paired	ILLUMINA	Illumina NovaSeq 6000	Whole metagenomic sequencing	fastq	NL7_R1.fq.gz	NL7_R2.fq.gz
PRJNA656389	SAMN15871300	NL1	Bubalus bubalis digestive tract metagenome	WGS	METAGENOMIC	PCR	paired	ILLUMINA	Illumina NovaSeq 6000	Whole metagenomic sequencing	fastq	NL1_R1.fq.gz	NL1_R2.fq.gz
PRJNA656389	SAMN15871301	NL34	Bubalus bubalis digestive tract metagenome	WGS	METAGENOMIC	PCR	paired	ILLUMINA	Illumina NovaSeq 6000	Whole metagenomic sequencing	fastq	NL34_R1.fq.gz	NL34_R2.fq.gz
PRJNA656389	SAMN15871302	NL8	Bubalus bubalis digestive tract metagenome	WGS	METAGENOMIC	PCR	paired	ILLUMINA	Illumina NovaSeq 6000	Whole metagenomic sequencing	fastq	NL8_R1.fq.gz	NL8_R2.fq.gz
PRJNA656389	SAMN15871303	NL9	Bubalus bubalis digestive tract metagenome	WGS	METAGENOMIC	PCR	paired	ILLUMINA	Illumina NovaSeq 6000	Whole metagenomic sequencing	fastq	NL9_R1.fq.gz	NL9_R2.fq.gz
PRJNA656389	SAMN15871304	S-1_BDME192032754-1a	Bubalus bubalis digestive tract metagenome	WGS	METAGENOMIC	PCR	paired	ILLUMINA	Illumina NovaSeq 6000	Whole metagenomic sequencing	fastq	S-1_BDME192032754-1a_1.fq.gz	S-1_BDME192032754-1a_2.fq.gz
PRJNA656389	SAMN15871305	S-2_BDME192032755-1a	Bubalus bubalis digestive tract metagenome	WGS	METAGENOMIC	PCR	paired	ILLUMINA	Illumina NovaSeq 6000	Whole metagenomic sequencing	fastq	S-2_BDME192032755-1a_1.fq.gz	S-2_BDME192032755-1a_2.fq.gz
PRJNA656389	SAMN15871306	S-3_BDME192032756-1a	Bubalus bubalis digestive tract metagenome	WGS	METAGENOMIC	PCR	paired	ILLUMINA	Illumina NovaSeq 6000	Whole metagenomic sequencing	fastq	S-3_BDME192032756-1a_1.fq.gz	S-3_BDME192032756-1a_2.fq.gz
PRJNA656389	SAMN15871307	S-4_BDME192032757-1a	Bubalus bubalis digestive tract metagenome	WGS	METAGENOMIC	PCR	paired	ILLUMINA	Illumina NovaSeq 6000	Whole metagenomic sequencing	fastq	S-4_BDME192032757-1a_1.fq.gz	S-4_BDME192032757-1a_2.fq.gz
PRJNA656389	SAMN15871308	S-5_BDME192032758-1a	Bubalus bubalis digestive tract metagenome	WGS	METAGENOMIC	PCR	paired	ILLUMINA	Illumina NovaSeq 6000	Whole metagenomic sequencing	fastq	S-5_BDME192032758-1a_1.fq.gz	S-5_BDME192032758-1a_2.fq.gz
PRJNA656389	SAMN15871309	S-6_BDME192032759-1a	Bubalus bubalis digestive tract metagenome	WGS	METAGENOMIC	PCR	paired	ILLUMINA	Illumina NovaSeq 6000	Whole metagenomic sequencing	fastq	S-6_BDME192032759-1a_1.fq.gz	S-6_BDME192032759-1a_2.fq.gz
PRJNA656389	SAMN15871310	S-7_BDME192032760-1a	Bubalus bubalis digestive tract metagenome	WGS	METAGENOMIC	PCR	paired	ILLUMINA	Illumina NovaSeq 6000	Whole metagenomic sequencing	fastq	S-7_BDME192032760-1a_1.fq.gz	S-7_BDME192032760-1a_2.fq.gz
PRJNA656389	SAMN15871311	S-8_BDME192032761-1a	Bubalus bubalis digestive tract metagenome	WGS	METAGENOMIC	PCR	paired	ILLUMINA	Illumina NovaSeq 6000	Whole metagenomic sequencing	fastq	S-8_BDME192032761-1a_1.fq.gz	S-8_BDME192032761-1a_2.fq.gz
PRJNA656389	SAMN15871312	S-9_BDME192032762-1a	Bubalus bubalis digestive tract metagenome	WGS	METAGENOMIC	PCR	paired	ILLUMINA	Illumina NovaSeq 6000	Whole metagenomic sequencing	fastq	S-9_BDME192032762-1a_1.fq.gz	S-9_BDME192032762-1a_2.fq.gz
PRJNA656389	SAMN15871313	S-11_BDME192032764-1a	Bubalus bubalis digestive tract metagenome	WGS	METAGENOMIC	PCR	paired	ILLUMINA	Illumina NovaSeq 6000	Whole metagenomic sequencing	fastq	S-11_BDME192032764-1a_1.fq.gz	S-11_BDME192032764-1a_2.fq.gz
PRJNA656389	SAMN15871314	S-12_BDME192032765-1a	Bubalus bubalis digestive tract metagenome	WGS	METAGENOMIC	PCR	paired	ILLUMINA	Illumina NovaSeq 6000	Whole metagenomic sequencing	fastq	S-12_BDME192032765-1a_1.fq.gz	S-12_BDME192032765-1a_2.fq.gz
PRJNA656389	SAMN15871315	S-13_BDME192032766-1a	Bubalus bubalis digestive tract metagenome	WGS	METAGENOMIC	PCR	paired	ILLUMINA	Illumina NovaSeq 6000	Whole metagenomic sequencing	fastq	S-13_BDME192032766-1a_1.fq.gz	S-13_BDME192032766-1a_2.fq.gz
PRJNA656389	SAMN15871316	S-14_BDME192032767-1a	Bubalus bubalis digestive tract metagenome	WGS	METAGENOMIC	PCR	paired	ILLUMINA	Illumina NovaSeq 6000	Whole metagenomic sequencing	fastq	S-14_BDME192032767-1a_1.fq.gz	S-14_BDME192032767-1a_2.fq.gz
PRJNA656389	SAMN15871317	S-15_BDME192032768-1a	Bubalus bubalis digestive tract metagenome	WGS	METAGENOMIC	PCR	paired	ILLUMINA	Illumina NovaSeq 6000	Whole metagenomic sequencing	fastq	S-15_BDME192032768-1a_1.fq.gz	S-15_BDME192032768-1a_2.fq.gz
PRJNA656389	SAMN15871318	S-16_BDME192032769-1a	Bubalus bubalis digestive tract metagenome	WGS	METAGENOMIC	PCR	paired	ILLUMINA	Illumina NovaSeq 6000	Whole metagenomic sequencing	fastq	S-16_BDME192032769-1a_1.fq.gz	S-16_BDME192032769-1a_2.fq.gz
PRJNA656389	SAMN15871319	S-17_BDME192032770-1a	Bubalus bubalis digestive tract metagenome	WGS	METAGENOMIC	PCR	paired	ILLUMINA	Illumina NovaSeq 6000	Whole metagenomic sequencing	fastq	S-17_BDME192032770-1a_1.fq.gz	S-17_BDME192032770-1a_2.fq.gz
PRJNA656389	SAMN15871320	S-18_BDME192032771-1a	Bubalus bubalis digestive tract metagenome	WGS	METAGENOMIC	PCR	paired	ILLUMINA	Illumina NovaSeq 6000	Whole metagenomic sequencing	fastq	S-18_BDME192032771-1a_1.fq.gz	S-18_BDME192032771-1a_2.fq.gz
PRJNA656389	SAMN15871321	S-19_BDME192032772-1a	Bubalus bubalis digestive tract metagenome	WGS	METAGENOMIC	PCR	paired	ILLUMINA	Illumina NovaSeq 6000	Whole metagenomic sequencing	fastq	S-19_BDME192032772-1a_1.fq.gz	S-19_BDME192032772-1a_2.fq.gz
PRJNA656389	SAMN15871322	S-20_BDME192032773-1a	Bubalus bubalis digestive tract metagenome	WGS	METAGENOMIC	PCR	paired	ILLUMINA	Illumina NovaSeq 6000	Whole metagenomic sequencing	fastq	S-20_BDME192032773-1a_1.fq.gz	S-20_BDME192032773-1a_2.fq.gz
PRJNA656389	SAMN15871323	S-21_BDME192032774-1a	Bubalus bubalis digestive tract metagenome	WGS	METAGENOMIC	PCR	paired	ILLUMINA	Illumina NovaSeq 6000	Whole metagenomic sequencing	fastq	S-21_BDME192032774-1a_1.fq.gz	S-21_BDME192032774-1a_2.fq.gz
PRJNA656389	SAMN15871324	S-22_BDME192032775-1a	Bubalus bubalis digestive tract metagenome	WGS	METAGENOMIC	PCR	paired	ILLUMINA	Illumina NovaSeq 6000	Whole metagenomic sequencing	fastq	S-22_BDME192032775-1a_1.fq.gz	S-22_BDME192032775-1a_2.fq.gz
PRJNA656389	SAMN15871325	S-23_BDME192032776-1a	Bubalus bubalis digestive tract metagenome	WGS	METAGENOMIC	PCR	paired	ILLUMINA	Illumina NovaSeq 6000	Whole metagenomic sequencing	fastq	S-23_BDME192032776-1a_1.fq.gz	S-23_BDME192032776-1a_2.fq.gz
PRJNA656389	SAMN15871326	S-24_BDME192032777-1a	Bubalus bubalis digestive tract metagenome	WGS	METAGENOMIC	PCR	paired	ILLUMINA	Illumina NovaSeq 6000	Whole metagenomic sequencing	fastq	S-24_BDME192032777-1a_1.fq.gz	S-24_BDME192032777-1a_2.fq.gz
PRJNA656389	SAMN15871327	S-25_BDME192032778-1a	Bubalus bubalis digestive tract metagenome	WGS	METAGENOMIC	PCR	paired	ILLUMINA	Illumina NovaSeq 6000	Whole metagenomic sequencing	fastq	S-25_BDME192032778-1a_1.fq.gz	S-25_BDME192032778-1a_2.fq.gz
PRJNA656389	SAMN15871328	S-26_BDME192032779-1a	Bubalus bubalis digestive tract metagenome	WGS	METAGENOMIC	PCR	paired	ILLUMINA	Illumina NovaSeq 6000	Whole metagenomic sequencing	fastq	S-26_BDME192032779-1a_1.fq.gz	S-26_BDME192032779-1a_2.fq.gz
PRJNA656389	SAMN15871329	S-27_BDME192032780-1a	Bubalus bubalis digestive tract metagenome	WGS	METAGENOMIC	PCR	paired	ILLUMINA	Illumina NovaSeq 6000	Whole metagenomic sequencing	fastq	S-27_BDME192032780-1a_1.fq.gz	S-27_BDME192032780-1a_2.fq.gz
PRJNA656389	SAMN15871330	S-28_BDME192032781-1a	Bubalus bubalis digestive tract metagenome	WGS	METAGENOMIC	PCR	paired	ILLUMINA	Illumina NovaSeq 6000	Whole metagenomic sequencing	fastq	S-28_BDME192032781-1a_1.fq.gz	S-28_BDME192032781-1a_2.fq.gz
PRJNA656389	SAMN15871331	S-29_BDME192032782-1a	Bubalus bubalis digestive tract metagenome	WGS	METAGENOMIC	PCR	paired	ILLUMINA	Illumina NovaSeq 6000	Whole metagenomic sequencing	fastq	S-29_BDME192032782-1a_1.fq.gz	S-29_BDME192032782-1a_2.fq.gz
PRJNA656389	SAMN15871332	S-30_BDME192032783-1a	Bubalus bubalis digestive tract metagenome	WGS	METAGENOMIC	PCR	paired	ILLUMINA	Illumina NovaSeq 6000	Whole metagenomic sequencing	fastq	S-30_BDME192032783-1a_1.fq.gz	S-30_BDME192032783-1a_2.fq.gz
PRJNA656389	SAMN15871333	S-31_BDME192032784-1a	Bubalus bubalis digestive tract metagenome	WGS	METAGENOMIC	PCR	paired	ILLUMINA	Illumina NovaSeq 6000	Whole metagenomic sequencing	fastq	S-31_BDME192032784-1a_1.fq.gz	S-31_BDME192032784-1a_2.fq.gz
PRJNA656389	SAMN15871334	S-32_BDME192032785-1a	Bubalus bubalis digestive tract metagenome	WGS	METAGENOMIC	PCR	paired	ILLUMINA	Illumina NovaSeq 6000	Whole metagenomic sequencing	fastq	S-32_BDME192032785-1a_1.fq.gz	S-32_BDME192032785-1a_2.fq.gz
PRJNA656389	SAMN15871335	S-33_BDME192032786-1a	Bubalus bubalis digestive tract metagenome	WGS	METAGENOMIC	PCR	paired	ILLUMINA	Illumina NovaSeq 6000	Whole metagenomic sequencing	fastq	S-33_BDME192032786-1a_1.fq.gz	S-33_BDME192032786-1a_2.fq.gz
PRJNA656389	SAMN15871336	S-34_BDME192032787-1a	Bubalus bubalis digestive tract metagenome	WGS	METAGENOMIC	PCR	paired	ILLUMINA	Illumina NovaSeq 6000	Whole metagenomic sequencing	fastq	S-34_BDME192032787-1a_1.fq.gz	S-34_BDME192032787-1a_2.fq.gz
PRJNA656389	SAMN15871337	S-36_BDME192032788-1a	Bubalus bubalis digestive tract metagenome	WGS	METAGENOMIC	PCR	paired	ILLUMINA	Illumina NovaSeq 6000	Whole metagenomic sequencing	fastq	S-36_BDME192032788-1a_1.fq.gz	S-36_BDME192032788-1a_2.fq.gz
PRJNA656389	SAMN15871338	S-37_BDME192032789-1a	Bubalus bubalis digestive tract metagenome	WGS	METAGENOMIC	PCR	paired	ILLUMINA	Illumina NovaSeq 6000	Whole metagenomic sequencing	fastq	S-37_BDME192032789-1a_1.fq.gz	S-37_BDME192032789-1a_2.fq.gz
PRJNA656389	SAMN15871339	S-38_BDME192032790-1a	Bubalus bubalis digestive tract metagenome	WGS	METAGENOMIC	PCR	paired	ILLUMINA	Illumina NovaSeq 6000	Whole metagenomic sequencing	fastq	S-38_BDME192032790-1a_1.fq.gz	S-38_BDME192032790-1a_2.fq.gz
PRJNA656389	SAMN15871340	S-39_BDME192032791-1a	Bubalus bubalis digestive tract metagenome	WGS	METAGENOMIC	PCR	paired	ILLUMINA	Illumina NovaSeq 6000	Whole metagenomic sequencing	fastq	S-39_BDME192032791-1a_1.fq.gz	S-39_BDME192032791-1a_2.fq.gz
PRJNA656389	SAMN15871341	S-40_BDME192032792-1a	Bubalus bubalis digestive tract metagenome	WGS	METAGENOMIC	PCR	paired	ILLUMINA	Illumina NovaSeq 6000	Whole metagenomic sequencing	fastq	S-40_BDME192032792-1a_1.fq.gz	S-40_BDME192032792-1a_2.fq.gz
PRJNA656389	SAMN15871342	S-41_BDME192032793-1a	Bubalus bubalis digestive tract metagenome	WGS	METAGENOMIC	PCR	paired	ILLUMINA	Illumina NovaSeq 6000	Whole metagenomic sequencing	fastq	S-41_BDME192032793-1a_1.fq.gz	S-41_BDME192032793-1a_2.fq.gz
PRJNA656389	SAMN15871343	S-42_BDME192032794-1a	Bubalus bubalis digestive tract metagenome	WGS	METAGENOMIC	PCR	paired	ILLUMINA	Illumina NovaSeq 6000	Whole metagenomic sequencing	fastq	S-42_BDME192032794-1a_1.fq.gz	S-42_BDME192032794-1a_2.fq.gz
PRJNA656389	SAMN15871344	S-43_BDME192032795-1a	Bubalus bubalis digestive tract metagenome	WGS	METAGENOMIC	PCR	paired	ILLUMINA	Illumina NovaSeq 6000	Whole metagenomic sequencing	fastq	S-43_BDME192032795-1a_1.fq.gz	S-43_BDME192032795-1a_2.fq.gz
PRJNA656389	SAMN15871345	S-44_BDME192032796-1a	Bubalus bubalis digestive tract metagenome	WGS	METAGENOMIC	PCR	paired	ILLUMINA	Illumina NovaSeq 6000	Whole metagenomic sequencing	fastq	S-44_BDME192032796-1a_1.fq.gz	S-44_BDME192032796-1a_2.fq.gz
PRJNA656389	SAMN15871346	S-45_BDME192032797-1a	Bubalus bubalis digestive tract metagenome	WGS	METAGENOMIC	PCR	paired	ILLUMINA	Illumina NovaSeq 6000	Whole metagenomic sequencing	fastq	S-45_BDME192032797-1a_1.fq.gz	S-45_BDME192032797-1a_2.fq.gz
PRJNA656389	SAMN15871347	S-46_BDME192032798-1a	Bubalus bubalis digestive tract metagenome	WGS	METAGENOMIC	PCR	paired	ILLUMINA	Illumina NovaSeq 6000	Whole metagenomic sequencing	fastq	S-46_BDME192032798-1a_1.fq.gz	S-46_BDME192032798-1a_2.fq.gz
PRJNA656389	SAMN15871348	S-47_BDME192032799-1a	Bubalus bubalis digestive tract metagenome	WGS	METAGENOMIC	PCR	paired	ILLUMINA	Illumina NovaSeq 6000	Whole metagenomic sequencing	fastq	S-47_BDME192032799-1a_1.fq.gz	S-47_BDME192032799-1a_2.fq.gz
PRJNA656389	SAMN15871349	S-48_BDME192032800-1a	Bubalus bubalis digestive tract metagenome	WGS	METAGENOMIC	PCR	paired	ILLUMINA	Illumina NovaSeq 6000	Whole metagenomic sequencing	fastq	S-48_BDME192032800-1a_1.fq.gz	S-48_BDME192032800-1a_2.fq.gz
PRJNA656389	SAMN15871350	S-49_BDME192032801-1a	Bubalus bubalis digestive tract metagenome	WGS	METAGENOMIC	PCR	paired	ILLUMINA	Illumina NovaSeq 6000	Whole metagenomic sequencing	fastq	S-49_BDME192032801-1a_1.fq.gz	S-49_BDME192032801-1a_2.fq.gz
PRJNA656389	SAMN15871351	S-50_BDME192032802-1a	Bubalus bubalis digestive tract metagenome	WGS	METAGENOMIC	PCR	paired	ILLUMINA	Illumina NovaSeq 6000	Whole metagenomic sequencing	fastq	S-50_BDME192032802-1a_1.fq.gz	S-50_BDME192032802-1a_2.fq.gz
PRJNA656389	SAMN15871352	S-51_BDME192032803-1a	Bubalus bubalis digestive tract metagenome	WGS	METAGENOMIC	PCR	paired	ILLUMINA	Illumina NovaSeq 6000	Whole metagenomic sequencing	fastq	S-51_BDME192032803-1a_1.fq.gz	S-51_BDME192032803-1a_2.fq.gz
PRJNA656389	SAMN15871353	S-52_BDME192032804-1a	Bubalus bubalis digestive tract metagenome	WGS	METAGENOMIC	PCR	paired	ILLUMINA	Illumina NovaSeq 6000	Whole metagenomic sequencing	fastq	S-52_BDME192032804-1a_1.fq.gz	S-52_BDME192032804-1a_2.fq.gz
PRJNA656389	SAMN15871354	S-53_BDME192032805-1a	Bubalus bubalis digestive tract metagenome	WGS	METAGENOMIC	PCR	paired	ILLUMINA	Illumina NovaSeq 6000	Whole metagenomic sequencing	fastq	S-53_BDME192032805-1a_1.fq.gz	S-53_BDME192032805-1a_2.fq.gz
PRJNA656389	SAMN15871355	S-54_BDME192032806-1a	Bubalus bubalis digestive tract metagenome	WGS	METAGENOMIC	PCR	paired	ILLUMINA	Illumina NovaSeq 6000	Whole metagenomic sequencing	fastq	S-54_BDME192032806-1a_1.fq.gz	S-54_BDME192032806-1a_2.fq.gz
PRJNA656389	SAMN15871356	S-55_BDME192032807-1a	Bubalus bubalis digestive tract metagenome	WGS	METAGENOMIC	PCR	paired	ILLUMINA	Illumina NovaSeq 6000	Whole metagenomic sequencing	fastq	S-55_BDME192032807-1a_1.fq.gz	S-55_BDME192032807-1a_2.fq.gz
PRJNA656389	SAMN15871357	S-56_BDME192032808-1a	Bubalus bubalis digestive tract metagenome	WGS	METAGENOMIC	PCR	paired	ILLUMINA	Illumina NovaSeq 6000	Whole metagenomic sequencing	fastq	S-56_BDME192032808-1a_1.fq.gz	S-56_BDME192032808-1a_2.fq.gz
PRJNA656389	SAMN15871358	S-57_BDME192032809-1a	Bubalus bubalis digestive tract metagenome	WGS	METAGENOMIC	PCR	paired	ILLUMINA	Illumina NovaSeq 6000	Whole metagenomic sequencing	fastq	S-57_BDME192032809-1a_1.fq.gz	S-57_BDME192032809-1a_2.fq.gz
PRJNA656389	SAMN15871359	S-58_BDME192032810-1a	Bubalus bubalis digestive tract metagenome	WGS	METAGENOMIC	PCR	paired	ILLUMINA	Illumina NovaSeq 6000	Whole metagenomic sequencing	fastq	S-58_BDME192032810-1a_1.fq.gz	S-58_BDME192032810-1a_2.fq.gz
PRJNA656389	SAMN15871360	S-59_BDME192032811-1a	Bubalus bubalis digestive tract metagenome	WGS	METAGENOMIC	PCR	paired	ILLUMINA	Illumina NovaSeq 6000	Whole metagenomic sequencing	fastq	S-59_BDME192032811-1a_1.fq.gz	S-59_BDME192032811-1a_2.fq.gz
PRJNA656389	SAMN15871361	S-60_BDME192032812-1a	Bubalus bubalis digestive tract metagenome	WGS	METAGENOMIC	PCR	paired	ILLUMINA	Illumina NovaSeq 6000	Whole metagenomic sequencing	fastq	S-60_BDME192032812-1a_1.fq.gz	S-60_BDME192032812-1a_2.fq.gz
PRJNA656389	SAMN15871362	S-61_BDME192032813-1a	Bubalus bubalis digestive tract metagenome	WGS	METAGENOMIC	PCR	paired	ILLUMINA	Illumina NovaSeq 6000	Whole metagenomic sequencing	fastq	S-61_BDME192032813-1a_1.fq.gz	S-61_BDME192032813-1a_2.fq.gz
PRJNA656389	SAMN15871363	S-62_BDME192032814-1a	Bubalus bubalis digestive tract metagenome	WGS	METAGENOMIC	PCR	paired	ILLUMINA	Illumina NovaSeq 6000	Whole metagenomic sequencing	fastq	S-62_BDME192032814-1a_1.fq.gz	S-62_BDME192032814-1a_2.fq.gz
PRJNA656389	SAMN15871364	S-63_BDME192032815-1a	Bubalus bubalis digestive tract metagenome	WGS	METAGENOMIC	PCR	paired	ILLUMINA	Illumina NovaSeq 6000	Whole metagenomic sequencing	fastq	S-63_BDME192032815-1a_1.fq.gz	S-63_BDME192032815-1a_2.fq.gz
PRJNA656389	SAMN15871365	S-64_BDME192032816-1a	Bubalus bubalis digestive tract metagenome	WGS	METAGENOMIC	PCR	paired	ILLUMINA	Illumina NovaSeq 6000	Whole metagenomic sequencing	fastq	S-64_BDME192032816-1a_1.fq.gz	S-64_BDME192032816-1a_2.fq.gz
PRJNA656389	SAMN15871366	S-11-071_FDME192071055-1a	Bubalus bubalis digestive tract metagenome	WGS	METAGENOMIC	PCR	paired	ILLUMINA	Illumina NovaSeq 6000	Whole metagenomic sequencing	fastq	S-11-071_FDME192071055-1a_1.fq.gz	S-11-071_FDME192071055-1a_2.fq.gz
PRJNA656389	SAMN15871367	S-17-0037_FDME192071048-1a	Bubalus bubalis digestive tract metagenome	WGS	METAGENOMIC	PCR	paired	ILLUMINA	Illumina NovaSeq 6000	Whole metagenomic sequencing	fastq	S-17-0037_FDME192071048-1a_1.fq.gz	S-17-0037_FDME192071048-1a_2.fq.gz
PRJNA656389	SAMN15871368	S-18-0084_FDME192071051-1a	Bubalus bubalis digestive tract metagenome	WGS	METAGENOMIC	PCR	paired	ILLUMINA	Illumina NovaSeq 6000	Whole metagenomic sequencing	fastq	S-18-0084_FDME192071051-1a_1.fq.gz	S-18-0084_FDME192071051-1a_2.fq.gz
PRJNA656389	SAMN15871369	S-19-0086_FDME192071060-1a	Bubalus bubalis digestive tract metagenome	WGS	METAGENOMIC	PCR	paired	ILLUMINA	Illumina NovaSeq 6000	Whole metagenomic sequencing	fastq	S-19-0086_FDME192071060-1a_1.fq.gz	S-19-0086_FDME192071060-1a_2.fq.gz
PRJNA656389	SAMN15871370	S-1_FDME192071053-1a	Bubalus bubalis digestive tract metagenome	WGS	METAGENOMIC	PCR	paired	ILLUMINA	Illumina NovaSeq 6000	Whole metagenomic sequencing	fastq	S-1_FDME192071053-1a_1.fq.gz	S-1_FDME192071053-1a_2.fq.gz
PRJNA656389	SAMN15871371	S-20-0040_FDME192071062-1a	Bubalus bubalis digestive tract metagenome	WGS	METAGENOMIC	PCR	paired	ILLUMINA	Illumina NovaSeq 6000	Whole metagenomic sequencing	fastq	S-20-0040_FDME192071062-1a_1.fq.gz	S-20-0040_FDME192071062-1a_2.fq.gz
PRJNA656389	SAMN15871372	S-2-0033_FDME192071052-1a	Bubalus bubalis digestive tract metagenome	WGS	METAGENOMIC	PCR	paired	ILLUMINA	Illumina NovaSeq 6000	Whole metagenomic sequencing	fastq	S-2-0033_FDME192071052-1a_1.fq.gz	S-2-0033_FDME192071052-1a_2.fq.gz
PRJNA656389	SAMN15871373	S-21_FDME192071056-1a	Bubalus bubalis digestive tract metagenome	WGS	METAGENOMIC	PCR	paired	ILLUMINA	Illumina NovaSeq 6000	Whole metagenomic sequencing	fastq	S-21_FDME192071056-1a_1.fq.gz	S-21_FDME192071056-1a_2.fq.gz
PRJNA656389	SAMN15871374	S-21_FDME192071058-1a	Bubalus bubalis digestive tract metagenome	WGS	METAGENOMIC	PCR	paired	ILLUMINA	Illumina NovaSeq 6000	Whole metagenomic sequencing	fastq	S-21_FDME192071058-1a_1.fq.gz	S-21_FDME192071058-1a_2.fq.gz
PRJNA656389	SAMN15871375	S-22_FDME192071049-1a	Bubalus bubalis digestive tract metagenome	WGS	METAGENOMIC	PCR	paired	ILLUMINA	Illumina NovaSeq 6000	Whole metagenomic sequencing	fastq	S-22_FDME192071049-1a_1.fq.gz	S-22_FDME192071049-1a_2.fq.gz
PRJNA656389	SAMN15871376	S-23_FDME192071050-1a	Bubalus bubalis digestive tract metagenome	WGS	METAGENOMIC	PCR	paired	ILLUMINA	Illumina NovaSeq 6000	Whole metagenomic sequencing	fastq	S-23_FDME192071050-1a_1.fq.gz	S-23_FDME192071050-1a_2.fq.gz
PRJNA656389	SAMN15871377	S-24-0082_FDME192071063-1a	Bubalus bubalis digestive tract metagenome	WGS	METAGENOMIC	PCR	paired	ILLUMINA	Illumina NovaSeq 6000	Whole metagenomic sequencing	fastq	S-24-0082_FDME192071063-1a_1.fq.gz	S-24-0082_FDME192071063-1a_2.fq.gz
PRJNA656389	SAMN15871378	S-35_FDME192071059-1a	Bubalus bubalis digestive tract metagenome	WGS	METAGENOMIC	PCR	paired	ILLUMINA	Illumina NovaSeq 6000	Whole metagenomic sequencing	fastq	S-35_FDME192071059-1a_1.fq.gz	S-35_FDME192071059-1a_2.fq.gz
PRJNA656389	SAMN15871379	S-4_FDME192071061-1a	Bubalus bubalis digestive tract metagenome	WGS	METAGENOMIC	PCR	paired	ILLUMINA	Illumina NovaSeq 6000	Whole metagenomic sequencing	fastq	S-4_FDME192071061-1a_1.fq.gz	S-4_FDME192071061-1a_2.fq.gz
PRJNA656389	SAMN15871380	S-5-0083_FDME192071057-1a	Bubalus bubalis digestive tract metagenome	WGS	METAGENOMIC	PCR	paired	ILLUMINA	Illumina NovaSeq 6000	Whole metagenomic sequencing	fastq	S-5-0083_FDME192071057-1a_1.fq.gz	S-5-0083_FDME192071057-1a_2.fq.gz
PRJNA656389	SAMN15871381	S-7-0038_FDME192071054-1a	Bubalus bubalis digestive tract metagenome	WGS	METAGENOMIC	PCR	paired	ILLUMINA	Illumina NovaSeq 6000	Whole metagenomic sequencing	fastq	S-7-0038_FDME192071054-1a_1.fq.gz	S-7-0038_FDME192071054-1a_2.fq.gz
PRJNA656389	SAMN15871382	S-8-0036_FDME192071065-1a	Bubalus bubalis digestive tract metagenome	WGS	METAGENOMIC	PCR	paired	ILLUMINA	Illumina NovaSeq 6000	Whole metagenomic sequencing	fastq	S-8-0036_FDME192071065-1a_1.fq.gz	S-8-0036_FDME192071065-1a_2.fq.gz
PRJNA656389	SAMN15871383	S-9-0039_FDME192071066-1a	Bubalus bubalis digestive tract metagenome	WGS	METAGENOMIC	PCR	paired	ILLUMINA	Illumina NovaSeq 6000	Whole metagenomic sequencing	fastq	S-9-0039_FDME192071066-1a_1.fq.gz	S-9-0039_FDME192071066-1a_2.fq.gz
PRJNA656389	SAMN15871384	S-24_FDME192071042-1a	Bubalus bubalis digestive tract metagenome	WGS	METAGENOMIC	PCR	paired	ILLUMINA	Illumina NovaSeq 6000	Whole metagenomic sequencing	fastq	S-24_FDME192071042-1a_1.fq.gz	S-24_FDME192071042-1a_2.fq.gz
PRJNA656389	SAMN15871385	S-25_FDME192071039-1a	Bubalus bubalis digestive tract metagenome	WGS	METAGENOMIC	PCR	paired	ILLUMINA	Illumina NovaSeq 6000	Whole metagenomic sequencing	fastq	S-25_FDME192071039-1a_1.fq.gz	S-25_FDME192071039-1a_2.fq.gz
PRJNA656389	SAMN15871386	S-26_FDME192071045-1a	Bubalus bubalis digestive tract metagenome	WGS	METAGENOMIC	PCR	paired	ILLUMINA	Illumina NovaSeq 6000	Whole metagenomic sequencing	fastq	S-26_FDME192071045-1a_1.fq.gz	S-26_FDME192071045-1a_2.fq.gz
PRJNA656389	SAMN15871387	S-28_FDME192071034-1a	Bubalus bubalis digestive tract metagenome	WGS	METAGENOMIC	PCR	paired	ILLUMINA	Illumina NovaSeq 6000	Whole metagenomic sequencing	fastq	S-28_FDME192071034-1a_1.fq.gz	S-28_FDME192071034-1a_2.fq.gz
PRJNA656389	SAMN15871388	S-29_FDME192071030-1a	Bubalus bubalis digestive tract metagenome	WGS	METAGENOMIC	PCR	paired	ILLUMINA	Illumina NovaSeq 6000	Whole metagenomic sequencing	fastq	S-29_FDME192071030-1a_1.fq.gz	S-29_FDME192071030-1a_2.fq.gz
PRJNA656389	SAMN15871389	S-509_FDME192071031-1a	Bubalus bubalis digestive tract metagenome	WGS	METAGENOMIC	PCR	paired	ILLUMINA	Illumina NovaSeq 6000	Whole metagenomic sequencing	fastq	S-509_FDME192071031-1a_1.fq.gz	S-509_FDME192071031-1a_2.fq.gz
PRJNA656389	SAMN15871390	S-511_FDME192071032-1a	Bubalus bubalis digestive tract metagenome	WGS	METAGENOMIC	PCR	paired	ILLUMINA	Illumina NovaSeq 6000	Whole metagenomic sequencing	fastq	S-511_FDME192071032-1a_1.fq.gz	S-511_FDME192071032-1a_2.fq.gz
PRJNA656389	SAMN15871391	S-515_FDME192071036-1a	Bubalus bubalis digestive tract metagenome	WGS	METAGENOMIC	PCR	paired	ILLUMINA	Illumina NovaSeq 6000	Whole metagenomic sequencing	fastq	S-515_FDME192071036-1a_1.fq.gz	S-515_FDME192071036-1a_2.fq.gz
PRJNA656389	SAMN15871392	S-516_FDME192071037-1a	Bubalus bubalis digestive tract metagenome	WGS	METAGENOMIC	PCR	paired	ILLUMINA	Illumina NovaSeq 6000	Whole metagenomic sequencing	fastq	S-516_FDME192071037-1a_1.fq.gz	S-516_FDME192071037-1a_2.fq.gz
PRJNA656389	SAMN15871393	S-517_FDME192071046-1a	Bubalus bubalis digestive tract metagenome	WGS	METAGENOMIC	PCR	paired	ILLUMINA	Illumina NovaSeq 6000	Whole metagenomic sequencing	fastq	S-517_FDME192071046-1a_1.fq.gz	S-517_FDME192071046-1a_2.fq.gz
PRJNA656389	SAMN15871394	S-518_FDME192071038-1a	Bubalus bubalis digestive tract metagenome	WGS	METAGENOMIC	PCR	paired	ILLUMINA	Illumina NovaSeq 6000	Whole metagenomic sequencing	fastq	S-518_FDME192071038-1a_1.fq.gz	S-518_FDME192071038-1a_2.fq.gz
PRJNA656389	SAMN15871395	S-519_FDME192071040-1a	Bubalus bubalis digestive tract metagenome	WGS	METAGENOMIC	PCR	paired	ILLUMINA	Illumina NovaSeq 6000	Whole metagenomic sequencing	fastq	S-519_FDME192071040-1a_1.fq.gz	S-519_FDME192071040-1a_2.fq.gz
PRJNA656389	SAMN15871396	S-520_FDME192071044-1a	Bubalus bubalis digestive tract metagenome	WGS	METAGENOMIC	PCR	paired	ILLUMINA	Illumina NovaSeq 6000	Whole metagenomic sequencing	fastq	S-520_FDME192071044-1a_1.fq.gz	S-520_FDME192071044-1a_2.fq.gz
PRJNA656389	SAMN15871397	S-521_FDME192071035-1a	Bubalus bubalis digestive tract metagenome	WGS	METAGENOMIC	PCR	paired	ILLUMINA	Illumina NovaSeq 6000	Whole metagenomic sequencing	fastq	S-521_FDME192071035-1a_1.fq.gz	S-521_FDME192071035-1a_2.fq.gz
PRJNA656389	SAMN15871398	S-523_FDME192071043-1a	Bubalus bubalis digestive tract metagenome	WGS	METAGENOMIC	PCR	paired	ILLUMINA	Illumina NovaSeq 6000	Whole metagenomic sequencing	fastq	S-523_FDME192071043-1a_1.fq.gz	S-523_FDME192071043-1a_2.fq.gz
PRJNA656389	SAMN15871399	S-64_FDME192071033-1a	Bubalus bubalis digestive tract metagenome	WGS	METAGENOMIC	PCR	paired	ILLUMINA	Illumina NovaSeq 6000	Whole metagenomic sequencing	fastq	S-64_FDME192071033-1a_1.fq.gz	S-64_FDME192071033-1a_2.fq.gz
PRJNA656389	SAMN15871400	S-75_FDME192071041-1a	Bubalus bubalis digestive tract metagenome	WGS	METAGENOMIC	PCR	paired	ILLUMINA	Illumina NovaSeq 6000	Whole metagenomic sequencing	fastq	S-75_FDME192071041-1a_1.fq.gz	S-75_FDME192071041-1a_2.fq.gz
PRJNA656389	SAMN15871401	S-97_FDME192071047-1a	Bubalus bubalis digestive tract metagenome	WGS	METAGENOMIC	PCR	paired	ILLUMINA	Illumina NovaSeq 6000	Whole metagenomic sequencing	fastq	S-97_FDME192071047-1a_1.fq.gz	S-97_FDME192071047-1a_2.fq.gz
PRJNA656389	SAMN15871402	GFW1	Bubalus bubalis digestive tract metagenome	WGS	METAGENOMIC	PCR	paired	ILLUMINA	Illumina NovaSeq 6000	Whole metagenomic sequencing	fastq	GFW1_R1.fq.gz	GFW1_R2.fq.gz
PRJNA656389	SAMN15871403	NW10	Bubalus bubalis digestive tract metagenome	WGS	METAGENOMIC	PCR	paired	ILLUMINA	Illumina NovaSeq 6000	Whole metagenomic sequencing	fastq	NW10_R1.fq.gz	NW10_R2.fq.gz
PRJNA656389	SAMN15871404	NW12	Bubalus bubalis digestive tract metagenome	WGS	METAGENOMIC	PCR	paired	ILLUMINA	Illumina NovaSeq 6000	Whole metagenomic sequencing	fastq	NW12_R1.fq.gz	NW12_R2.fq.gz
PRJNA656389	SAMN15871405	NW13	Bubalus bubalis digestive tract metagenome	WGS	METAGENOMIC	PCR	paired	ILLUMINA	Illumina NovaSeq 6000	Whole metagenomic sequencing	fastq	NW13_R1.fq.gz	NW13_R2.fq.gz
PRJNA656389	SAMN15871406	NW15	Bubalus bubalis digestive tract metagenome	WGS	METAGENOMIC	PCR	paired	ILLUMINA	Illumina NovaSeq 6000	Whole metagenomic sequencing	fastq	NW15_R1.fq.gz	NW15_R2.fq.gz
PRJNA656389	SAMN15871407	NW16	Bubalus bubalis digestive tract metagenome	WGS	METAGENOMIC	PCR	paired	ILLUMINA	Illumina NovaSeq 6000	Whole metagenomic sequencing	fastq	NW16_R1.fq.gz	NW16_R2.fq.gz
PRJNA656389	SAMN15871408	NW19	Bubalus bubalis digestive tract metagenome	WGS	METAGENOMIC	PCR	paired	ILLUMINA	Illumina NovaSeq 6000	Whole metagenomic sequencing	fastq	NW19_R1.fq.gz	NW19_R2.fq.gz
PRJNA656389	SAMN15871409	NW21	Bubalus bubalis digestive tract metagenome	WGS	METAGENOMIC	PCR	paired	ILLUMINA	Illumina NovaSeq 6000	Whole metagenomic sequencing	fastq	NW21_R1.fq.gz	NW21_R2.fq.gz
PRJNA656389	SAMN15871410	NW24	Bubalus bubalis digestive tract metagenome	WGS	METAGENOMIC	PCR	paired	ILLUMINA	Illumina NovaSeq 6000	Whole metagenomic sequencing	fastq	NW24_R1.fq.gz	NW24_R2.fq.gz
PRJNA656389	SAMN15871411	NW25	Bubalus bubalis digestive tract metagenome	WGS	METAGENOMIC	PCR	paired	ILLUMINA	Illumina NovaSeq 6000	Whole metagenomic sequencing	fastq	NW25_R1.fq.gz	NW25_R2.fq.gz
PRJNA656389	SAMN15871412	NW26	Bubalus bubalis digestive tract metagenome	WGS	METAGENOMIC	PCR	paired	ILLUMINA	Illumina NovaSeq 6000	Whole metagenomic sequencing	fastq	NW26_R1.fq.gz	NW26_R2.fq.gz
PRJNA656389	SAMN15871413	NW27	Bubalus bubalis digestive tract metagenome	WGS	METAGENOMIC	PCR	paired	ILLUMINA	Illumina NovaSeq 6000	Whole metagenomic sequencing	fastq	NW27_R1.fq.gz	NW27_R2.fq.gz
PRJNA656389	SAMN15871414	NW28	Bubalus bubalis digestive tract metagenome	WGS	METAGENOMIC	PCR	paired	ILLUMINA	Illumina NovaSeq 6000	Whole metagenomic sequencing	fastq	NW28_R1.fq.gz	NW28_R2.fq.gz
PRJNA656389	SAMN15871415	NW29	Bubalus bubalis digestive tract metagenome	WGS	METAGENOMIC	PCR	paired	ILLUMINA	Illumina NovaSeq 6000	Whole metagenomic sequencing	fastq	NW29_R1.fq.gz	NW29_R2.fq.gz
PRJNA656389	SAMN15871416	NW31	Bubalus bubalis digestive tract metagenome	WGS	METAGENOMIC	PCR	paired	ILLUMINA	Illumina NovaSeq 6000	Whole metagenomic sequencing	fastq	NW31_R1.fq.gz	NW31_R2.fq.gz
PRJNA656389	SAMN15871417	NW32	Bubalus bubalis digestive tract metagenome	WGS	METAGENOMIC	PCR	paired	ILLUMINA	Illumina NovaSeq 6000	Whole metagenomic sequencing	fastq	NW32_R1.fq.gz	NW32_R2.fq.gz
PRJNA656389	SAMN15871418	NW33	Bubalus bubalis digestive tract metagenome	WGS	METAGENOMIC	PCR	paired	ILLUMINA	Illumina NovaSeq 6000	Whole metagenomic sequencing	fastq	NW33_R1.fq.gz	NW33_R2.fq.gz
PRJNA656389	SAMN15871419	NW6	Bubalus bubalis digestive tract metagenome	WGS	METAGENOMIC	PCR	paired	ILLUMINA	Illumina NovaSeq 6000	Whole metagenomic sequencing	fastq	NW6_R1.fq.gz	NW6_R2.fq.gz
PRJNA656389	SAMN15871420	NW18	Bubalus bubalis digestive tract metagenome	WGS	METAGENOMIC	PCR	paired	ILLUMINA	Illumina NovaSeq 6000	Whole metagenomic sequencing	fastq	NW18_R1.fq.gz	NW18_R2.fq.gz
PRJNA656389	SAMN15871421	NW2	Bubalus bubalis digestive tract metagenome	WGS	METAGENOMIC	PCR	paired	ILLUMINA	Illumina NovaSeq 6000	Whole metagenomic sequencing	fastq	NW2_R1.fq.gz	NW2_R2.fq.gz
PRJNA656389	SAMN15871422	NW3	Bubalus bubalis digestive tract metagenome	WGS	METAGENOMIC	PCR	paired	ILLUMINA	Illumina NovaSeq 6000	Whole metagenomic sequencing	fastq	NW3_R1.fq.gz	NW3_R2.fq.gz
PRJNA656389	SAMN15871423	NW35	Bubalus bubalis digestive tract metagenome	WGS	METAGENOMIC	PCR	paired	ILLUMINA	Illumina NovaSeq 6000	Whole metagenomic sequencing	fastq	NW35_R1.fq.gz	NW35_R2.fq.gz
PRJNA656389	SAMN15871424	NW4	Bubalus bubalis digestive tract metagenome	WGS	METAGENOMIC	PCR	paired	ILLUMINA	Illumina NovaSeq 6000	Whole metagenomic sequencing	fastq	NW4_R1.fq.gz	NW4_R2.fq.gz
PRJNA656389	SAMN15871425	NW5	Bubalus bubalis digestive tract metagenome	WGS	METAGENOMIC	PCR	paired	ILLUMINA	Illumina NovaSeq 6000	Whole metagenomic sequencing	fastq	NW5_R1.fq.gz	NW5_R2.fq.gz
PRJNA656389	SAMN15871426	NW7	Bubalus bubalis digestive tract metagenome	WGS	METAGENOMIC	PCR	paired	ILLUMINA	Illumina NovaSeq 6000	Whole metagenomic sequencing	fastq	NW7_R1.fq.gz	NW7_R2.fq.gz
PRJNA656389	SAMN15871427	NW8	Bubalus bubalis digestive tract metagenome	WGS	METAGENOMIC	PCR	paired	ILLUMINA	Illumina NovaSeq 6000	Whole metagenomic sequencing	fastq	NW8_R1.fq.gz	NW8_R2.fq.gz
PRJNA656389	SAMN15871428	NW30	Bubalus bubalis digestive tract metagenome	WGS	METAGENOMIC	PCR	paired	ILLUMINA	Illumina NovaSeq 6000	Whole metagenomic sequencing	fastq	NW30_R1.fq.gz	NW30_R2.fq.gz
PRJNA656389	SAMN15871429	NW34	Bubalus bubalis digestive tract metagenome	WGS	METAGENOMIC	PCR	paired	ILLUMINA	Illumina NovaSeq 6000	Whole metagenomic sequencing	fastq	NW34_R1.fq.gz	NW34_R2.fq.gz
PRJNA656389	SAMN15871430	GFB1	Bubalus bubalis digestive tract metagenome	WGS	METAGENOMIC	PCR	paired	ILLUMINA	Illumina NovaSeq 6000	Whole metagenomic sequencing	fastq	GFB1_R1.fq.gz	GFB1_R2.fq.gz
PRJNA656389	SAMN15871431	NB15	Bubalus bubalis digestive tract metagenome	WGS	METAGENOMIC	PCR	paired	ILLUMINA	Illumina NovaSeq 6000	Whole metagenomic sequencing	fastq	NB15_R1.fq.gz	NB15_R2.fq.gz
PRJNA656389	SAMN15871432	NB16	Bubalus bubalis digestive tract metagenome	WGS	METAGENOMIC	PCR	paired	ILLUMINA	Illumina NovaSeq 6000	Whole metagenomic sequencing	fastq	NB16_R1.fq.gz	NB16_R2.fq.gz
PRJNA656389	SAMN15871433	NB17	Bubalus bubalis digestive tract metagenome	WGS	METAGENOMIC	PCR	paired	ILLUMINA	Illumina NovaSeq 6000	Whole metagenomic sequencing	fastq	NB17_R1.fq.gz	NB17_R2.fq.gz
PRJNA656389	SAMN15871434	NB18	Bubalus bubalis digestive tract metagenome	WGS	METAGENOMIC	PCR	paired	ILLUMINA	Illumina NovaSeq 6000	Whole metagenomic sequencing	fastq	NB18_R1.fq.gz	NB18_R2.fq.gz
PRJNA656389	SAMN15871435	NB19	Bubalus bubalis digestive tract metagenome	WGS	METAGENOMIC	PCR	paired	ILLUMINA	Illumina NovaSeq 6000	Whole metagenomic sequencing	fastq	NB19_R1.fq.gz	NB19_R2.fq.gz
PRJNA656389	SAMN15871436	NB21	Bubalus bubalis digestive tract metagenome	WGS	METAGENOMIC	PCR	paired	ILLUMINA	Illumina NovaSeq 6000	Whole metagenomic sequencing	fastq	NB21_R1.fq.gz	NB21_R2.fq.gz
PRJNA656389	SAMN15871437	NB22	Bubalus bubalis digestive tract metagenome	WGS	METAGENOMIC	PCR	paired	ILLUMINA	Illumina NovaSeq 6000	Whole metagenomic sequencing	fastq	NB22_R1.fq.gz	NB22_R2.fq.gz
PRJNA656389	SAMN15871438	NB25	Bubalus bubalis digestive tract metagenome	WGS	METAGENOMIC	PCR	paired	ILLUMINA	Illumina NovaSeq 6000	Whole metagenomic sequencing	fastq	NB25_R1.fq.gz	NB25_R2.fq.gz
PRJNA656389	SAMN15871439	NB26	Bubalus bubalis digestive tract metagenome	WGS	METAGENOMIC	PCR	paired	ILLUMINA	Illumina NovaSeq 6000	Whole metagenomic sequencing	fastq	NB26_R1.fq.gz	NB26_R2.fq.gz
PRJNA656389	SAMN15871440	NB27	Bubalus bubalis digestive tract metagenome	WGS	METAGENOMIC	PCR	paired	ILLUMINA	Illumina NovaSeq 6000	Whole metagenomic sequencing	fastq	NB27_R1.fq.gz	NB27_R2.fq.gz
PRJNA656389	SAMN15871441	NB28	Bubalus bubalis digestive tract metagenome	WGS	METAGENOMIC	PCR	paired	ILLUMINA	Illumina NovaSeq 6000	Whole metagenomic sequencing	fastq	NB28_R1.fq.gz	NB28_R2.fq.gz
PRJNA656389	SAMN15871442	NB29	Bubalus bubalis digestive tract metagenome	WGS	METAGENOMIC	PCR	paired	ILLUMINA	Illumina NovaSeq 6000	Whole metagenomic sequencing	fastq	NB29_R1.fq.gz	NB29_R2.fq.gz
PRJNA656389	SAMN15871443	NB30	Bubalus bubalis digestive tract metagenome	WGS	METAGENOMIC	PCR	paired	ILLUMINA	Illumina NovaSeq 6000	Whole metagenomic sequencing	fastq	NB30_R1.fq.gz	NB30_R2.fq.gz
PRJNA656389	SAMN15871444	NB31	Bubalus bubalis digestive tract metagenome	WGS	METAGENOMIC	PCR	paired	ILLUMINA	Illumina NovaSeq 6000	Whole metagenomic sequencing	fastq	NB31_R1.fq.gz	NB31_R2.fq.gz
PRJNA656389	SAMN15871445	NB32	Bubalus bubalis digestive tract metagenome	WGS	METAGENOMIC	PCR	paired	ILLUMINA	Illumina NovaSeq 6000	Whole metagenomic sequencing	fastq	NB32_R1.fq.gz	NB32_R2.fq.gz
PRJNA656389	SAMN15871446	NB33	Bubalus bubalis digestive tract metagenome	WGS	METAGENOMIC	PCR	paired	ILLUMINA	Illumina NovaSeq 6000	Whole metagenomic sequencing	fastq	NB33_R1.fq.gz	NB33_R2.fq.gz
PRJNA656389	SAMN15871447	NB34	Bubalus bubalis digestive tract metagenome	WGS	METAGENOMIC	PCR	paired	ILLUMINA	Illumina NovaSeq 6000	Whole metagenomic sequencing	fastq	NB34_R1.fq.gz	NB34_R2.fq.gz
PRJNA656389	SAMN15871448	NB10	Bubalus bubalis digestive tract metagenome	WGS	METAGENOMIC	PCR	paired	ILLUMINA	Illumina NovaSeq 6000	Whole metagenomic sequencing	fastq	NB10_R1.fq.gz	NB10_R2.fq.gz
PRJNA656389	SAMN15871449	NB2	Bubalus bubalis digestive tract metagenome	WGS	METAGENOMIC	PCR	paired	ILLUMINA	Illumina NovaSeq 6000	Whole metagenomic sequencing	fastq	NB2_R1.fq.gz	NB2_R2.fq.gz
PRJNA656389	SAMN15871450	NB24	Bubalus bubalis digestive tract metagenome	WGS	METAGENOMIC	PCR	paired	ILLUMINA	Illumina NovaSeq 6000	Whole metagenomic sequencing	fastq	NB24_R1.fq.gz	NB24_R2.fq.gz
PRJNA656389	SAMN15871451	NB3	Bubalus bubalis digestive tract metagenome	WGS	METAGENOMIC	PCR	paired	ILLUMINA	Illumina NovaSeq 6000	Whole metagenomic sequencing	fastq	NB3_R1.fq.gz	NB3_R2.fq.gz
PRJNA656389	SAMN15871452	NB35	Bubalus bubalis digestive tract metagenome	WGS	METAGENOMIC	PCR	paired	ILLUMINA	Illumina NovaSeq 6000	Whole metagenomic sequencing	fastq	NB35_R1.fq.gz	NB35_R2.fq.gz
PRJNA656389	SAMN15871453	NB4	Bubalus bubalis digestive tract metagenome	WGS	METAGENOMIC	PCR	paired	ILLUMINA	Illumina NovaSeq 6000	Whole metagenomic sequencing	fastq	NB4_R1.fq.gz	NB4_R2.fq.gz
PRJNA656389	SAMN15871454	NB6	Bubalus bubalis digestive tract metagenome	WGS	METAGENOMIC	PCR	paired	ILLUMINA	Illumina NovaSeq 6000	Whole metagenomic sequencing	fastq	NB6_R1.fq.gz	NB6_R2.fq.gz
PRJNA656389	SAMN15871455	NB1	Bubalus bubalis digestive tract metagenome	WGS	METAGENOMIC	PCR	paired	ILLUMINA	Illumina NovaSeq 6000	Whole metagenomic sequencing	fastq	NB1_R1.fq.gz	NB1_R2.fq.gz
PRJNA656389	SAMN15871456	NB13	Bubalus bubalis digestive tract metagenome	WGS	METAGENOMIC	PCR	paired	ILLUMINA	Illumina NovaSeq 6000	Whole metagenomic sequencing	fastq	NB13_R1.fq.gz	NB13_R2.fq.gz
PRJNA656389	SAMN15871457	NB14	Bubalus bubalis digestive tract metagenome	WGS	METAGENOMIC	PCR	paired	ILLUMINA	Illumina NovaSeq 6000	Whole metagenomic sequencing	fastq	NB14_R1.fq.gz	NB14_R2.fq.gz
PRJNA656389	SAMN15871458	NB5	Bubalus bubalis digestive tract metagenome	WGS	METAGENOMIC	PCR	paired	ILLUMINA	Illumina NovaSeq 6000	Whole metagenomic sequencing	fastq	NB5_R1.fq.gz	NB5_R2.fq.gz
PRJNA656389	SAMN15871459	NB7	Bubalus bubalis digestive tract metagenome	WGS	METAGENOMIC	PCR	paired	ILLUMINA	Illumina NovaSeq 6000	Whole metagenomic sequencing	fastq	NB7_R1.fq.gz	NB7_R2.fq.gz
PRJNA656389	SAMN15871460	NB8	Bubalus bubalis digestive tract metagenome	WGS	METAGENOMIC	PCR	paired	ILLUMINA	Illumina NovaSeq 6000	Whole metagenomic sequencing	fastq	NB8_R1.fq.gz	NB8_R2.fq.gz
PRJNA656389	SAMN15871461	NB9	Bubalus bubalis digestive tract metagenome	WGS	METAGENOMIC	PCR	paired	ILLUMINA	Illumina NovaSeq 6000	Whole metagenomic sequencing	fastq	NB9_R1.fq.gz	NB9_R2.fq.gz
PRJNA656389	SAMN15871462	NZ15	Bubalus bubalis digestive tract metagenome	WGS	METAGENOMIC	PCR	paired	ILLUMINA	Illumina NovaSeq 6000	Whole metagenomic sequencing	fastq	NZ15_R1.fq.gz	NZ15_R2.fq.gz
PRJNA656389	SAMN15871463	NZ18	Bubalus bubalis digestive tract metagenome	WGS	METAGENOMIC	PCR	paired	ILLUMINA	Illumina NovaSeq 6000	Whole metagenomic sequencing	fastq	NZ18_R1.fq.gz	NZ18_R2.fq.gz
PRJNA656389	SAMN15871464	NZ21	Bubalus bubalis digestive tract metagenome	WGS	METAGENOMIC	PCR	paired	ILLUMINA	Illumina NovaSeq 6000	Whole metagenomic sequencing	fastq	NZ21_R1.fq.gz	NZ21_R2.fq.gz
PRJNA656389	SAMN15871465	NZ25	Bubalus bubalis digestive tract metagenome	WGS	METAGENOMIC	PCR	paired	ILLUMINA	Illumina NovaSeq 6000	Whole metagenomic sequencing	fastq	NZ25_R1.fq.gz	NZ25_R2.fq.gz
PRJNA656389	SAMN15871466	NZ27	Bubalus bubalis digestive tract metagenome	WGS	METAGENOMIC	PCR	paired	ILLUMINA	Illumina NovaSeq 6000	Whole metagenomic sequencing	fastq	NZ27_R1.fq.gz	NZ27_R2.fq.gz
PRJNA656389	SAMN15871467	NZ10	Bubalus bubalis digestive tract metagenome	WGS	METAGENOMIC	PCR	paired	ILLUMINA	Illumina NovaSeq 6000	Whole metagenomic sequencing	fastq	NZ10_R1.fq.gz	NZ10_R2.fq.gz
PRJNA656389	SAMN15871468	NZ22	Bubalus bubalis digestive tract metagenome	WGS	METAGENOMIC	PCR	paired	ILLUMINA	Illumina NovaSeq 6000	Whole metagenomic sequencing	fastq	NZ22_R1.fq.gz	NZ22_R2.fq.gz
PRJNA656389	SAMN15871469	NZ33	Bubalus bubalis digestive tract metagenome	WGS	METAGENOMIC	PCR	paired	ILLUMINA	Illumina NovaSeq 6000	Whole metagenomic sequencing	fastq	NZ33_R1.fq.gz	NZ33_R2.fq.gz
PRJNA656389	SAMN15871470	NZ1	Bubalus bubalis digestive tract metagenome	WGS	METAGENOMIC	PCR	paired	ILLUMINA	Illumina NovaSeq 6000	Whole metagenomic sequencing	fastq	NZ1_R1.fq.gz	NZ1_R2.fq.gz
PRJNA656389	SAMN15871471	NZ11	Bubalus bubalis digestive tract metagenome	WGS	METAGENOMIC	PCR	paired	ILLUMINA	Illumina NovaSeq 6000	Whole metagenomic sequencing	fastq	NZ11_R1.fq.gz	NZ11_R2.fq.gz
PRJNA656389	SAMN15871472	NZ16	Bubalus bubalis digestive tract metagenome	WGS	METAGENOMIC	PCR	paired	ILLUMINA	Illumina NovaSeq 6000	Whole metagenomic sequencing	fastq	NZ16_R1.fq.gz	NZ16_R2.fq.gz
PRJNA656389	SAMN15871473	NZ2	Bubalus bubalis digestive tract metagenome	WGS	METAGENOMIC	PCR	paired	ILLUMINA	Illumina NovaSeq 6000	Whole metagenomic sequencing	fastq	NZ2_R1.fq.gz	NZ2_R2.fq.gz
PRJNA656389	SAMN15871474	NZ24	Bubalus bubalis digestive tract metagenome	WGS	METAGENOMIC	PCR	paired	ILLUMINA	Illumina NovaSeq 6000	Whole metagenomic sequencing	fastq	NZ24_R1.fq.gz	NZ24_R2.fq.gz
PRJNA656389	SAMN15871475	NZ26	Bubalus bubalis digestive tract metagenome	WGS	METAGENOMIC	PCR	paired	ILLUMINA	Illumina NovaSeq 6000	Whole metagenomic sequencing	fastq	NZ26_R1.fq.gz	NZ26_R2.fq.gz
PRJNA656389	SAMN15871476	NZ29	Bubalus bubalis digestive tract metagenome	WGS	METAGENOMIC	PCR	paired	ILLUMINA	Illumina NovaSeq 6000	Whole metagenomic sequencing	fastq	NZ29_R1.fq.gz	NZ29_R2.fq.gz
PRJNA656389	SAMN15871477	NZ3	Bubalus bubalis digestive tract metagenome	WGS	METAGENOMIC	PCR	paired	ILLUMINA	Illumina NovaSeq 6000	Whole metagenomic sequencing	fastq	NZ3_R1.fq.gz	NZ3_R2.fq.gz
PRJNA656389	SAMN15871478	NZ32	Bubalus bubalis digestive tract metagenome	WGS	METAGENOMIC	PCR	paired	ILLUMINA	Illumina NovaSeq 6000	Whole metagenomic sequencing	fastq	NZ32_R1.fq.gz	NZ32_R2.fq.gz
PRJNA656389	SAMN15871479	NZ35	Bubalus bubalis digestive tract metagenome	WGS	METAGENOMIC	PCR	paired	ILLUMINA	Illumina NovaSeq 6000	Whole metagenomic sequencing	fastq	NZ35_R1.fq.gz	NZ35_R2.fq.gz
PRJNA656389	SAMN15871480	NZ4	Bubalus bubalis digestive tract metagenome	WGS	METAGENOMIC	PCR	paired	ILLUMINA	Illumina NovaSeq 6000	Whole metagenomic sequencing	fastq	NZ4_R1.fq.gz	NZ4_R2.fq.gz
PRJNA656389	SAMN15871481	NZ5	Bubalus bubalis digestive tract metagenome	WGS	METAGENOMIC	PCR	paired	ILLUMINA	Illumina NovaSeq 6000	Whole metagenomic sequencing	fastq	NZ5_R1.fq.gz	NZ5_R2.fq.gz
PRJNA656389	SAMN15871482	NZ6	Bubalus bubalis digestive tract metagenome	WGS	METAGENOMIC	PCR	paired	ILLUMINA	Illumina NovaSeq 6000	Whole metagenomic sequencing	fastq	NZ6_R1.fq.gz	NZ6_R2.fq.gz
PRJNA656389	SAMN15871483	NZ7	Bubalus bubalis digestive tract metagenome	WGS	METAGENOMIC	PCR	paired	ILLUMINA	Illumina NovaSeq 6000	Whole metagenomic sequencing	fastq	NZ7_R1.fq.gz	NZ7_R2.fq.gz
PRJNA656389	SAMN15871484	NM15	Bubalus bubalis digestive tract metagenome	WGS	METAGENOMIC	PCR	paired	ILLUMINA	Illumina NovaSeq 6000	Whole metagenomic sequencing	fastq	NM15_R1.fq.gz	NM15_R2.fq.gz
PRJNA656389	SAMN15871485	NM17	Bubalus bubalis digestive tract metagenome	WGS	METAGENOMIC	PCR	paired	ILLUMINA	Illumina NovaSeq 6000	Whole metagenomic sequencing	fastq	NM17_R1.fq.gz	NM17_R2.fq.gz
PRJNA656389	SAMN15871486	NM18	Bubalus bubalis digestive tract metagenome	WGS	METAGENOMIC	PCR	paired	ILLUMINA	Illumina NovaSeq 6000	Whole metagenomic sequencing	fastq	NM18_R1.fq.gz	NM18_R2.fq.gz
PRJNA656389	SAMN15871487	NM19	Bubalus bubalis digestive tract metagenome	WGS	METAGENOMIC	PCR	paired	ILLUMINA	Illumina NovaSeq 6000	Whole metagenomic sequencing	fastq	NM19_R1.fq.gz	NM19_R2.fq.gz
PRJNA656389	SAMN15871488	NM27	Bubalus bubalis digestive tract metagenome	WGS	METAGENOMIC	PCR	paired	ILLUMINA	Illumina NovaSeq 6000	Whole metagenomic sequencing	fastq	NM27_R1.fq.gz	NM27_R2.fq.gz
PRJNA656389	SAMN15871489	NM33	Bubalus bubalis digestive tract metagenome	WGS	METAGENOMIC	PCR	paired	ILLUMINA	Illumina NovaSeq 6000	Whole metagenomic sequencing	fastq	NM33_R1.fq.gz	NM33_R2.fq.gz
PRJNA656389	SAMN15871490	NM14	Bubalus bubalis digestive tract metagenome	WGS	METAGENOMIC	PCR	paired	ILLUMINA	Illumina NovaSeq 6000	Whole metagenomic sequencing	fastq	NM14_R1.fq.gz	NM14_R2.fq.gz
PRJNA656389	SAMN15871491	NM16	Bubalus bubalis digestive tract metagenome	WGS	METAGENOMIC	PCR	paired	ILLUMINA	Illumina NovaSeq 6000	Whole metagenomic sequencing	fastq	NM16_R1.fq.gz	NM16_R2.fq.gz
PRJNA656389	SAMN15871492	NM2	Bubalus bubalis digestive tract metagenome	WGS	METAGENOMIC	PCR	paired	ILLUMINA	Illumina NovaSeq 6000	Whole metagenomic sequencing	fastq	NM2_R1.fq.gz	NM2_R2.fq.gz
PRJNA656389	SAMN15871493	NM21	Bubalus bubalis digestive tract metagenome	WGS	METAGENOMIC	PCR	paired	ILLUMINA	Illumina NovaSeq 6000	Whole metagenomic sequencing	fastq	NM21_R1.fq.gz	NM21_R2.fq.gz
PRJNA656389	SAMN15871494	NM22	Bubalus bubalis digestive tract metagenome	WGS	METAGENOMIC	PCR	paired	ILLUMINA	Illumina NovaSeq 6000	Whole metagenomic sequencing	fastq	NM22_R1.fq.gz	NM22_R2.fq.gz
PRJNA656389	SAMN15871495	NM24	Bubalus bubalis digestive tract metagenome	WGS	METAGENOMIC	PCR	paired	ILLUMINA	Illumina NovaSeq 6000	Whole metagenomic sequencing	fastq	NM24_R1.fq.gz	NM24_R2.fq.gz
PRJNA656389	SAMN15871496	NM25	Bubalus bubalis digestive tract metagenome	WGS	METAGENOMIC	PCR	paired	ILLUMINA	Illumina NovaSeq 6000	Whole metagenomic sequencing	fastq	NM25_R1.fq.gz	NM25_R2.fq.gz
PRJNA656389	SAMN15871497	NM26	Bubalus bubalis digestive tract metagenome	WGS	METAGENOMIC	PCR	paired	ILLUMINA	Illumina NovaSeq 6000	Whole metagenomic sequencing	fastq	NM26_R1.fq.gz	NM26_R2.fq.gz
PRJNA656389	SAMN15871498	NM28	Bubalus bubalis digestive tract metagenome	WGS	METAGENOMIC	PCR	paired	ILLUMINA	Illumina NovaSeq 6000	Whole metagenomic sequencing	fastq	NM28_R1.fq.gz	NM28_R2.fq.gz
PRJNA656389	SAMN15871499	NM29	Bubalus bubalis digestive tract metagenome	WGS	METAGENOMIC	PCR	paired	ILLUMINA	Illumina NovaSeq 6000	Whole metagenomic sequencing	fastq	NM29_R1.fq.gz	NM29_R2.fq.gz
PRJNA656389	SAMN15871500	NM3	Bubalus bubalis digestive tract metagenome	WGS	METAGENOMIC	PCR	paired	ILLUMINA	Illumina NovaSeq 6000	Whole metagenomic sequencing	fastq	NM3_R1.fq.gz	NM3_R2.fq.gz
PRJNA656389	SAMN15871501	NM30	Bubalus bubalis digestive tract metagenome	WGS	METAGENOMIC	PCR	paired	ILLUMINA	Illumina NovaSeq 6000	Whole metagenomic sequencing	fastq	NM30_R1.fq.gz	NM30_R2.fq.gz
PRJNA656389	SAMN15871502	NM31	Bubalus bubalis digestive tract metagenome	WGS	METAGENOMIC	PCR	paired	ILLUMINA	Illumina NovaSeq 6000	Whole metagenomic sequencing	fastq	NM31_R1.fq.gz	NM31_R2.fq.gz
PRJNA656389	SAMN15871503	NM32	Bubalus bubalis digestive tract metagenome	WGS	METAGENOMIC	PCR	paired	ILLUMINA	Illumina NovaSeq 6000	Whole metagenomic sequencing	fastq	NM32_R1.fq.gz	NM32_R2.fq.gz
PRJNA656389	SAMN15871504	NM34	Bubalus bubalis digestive tract metagenome	WGS	METAGENOMIC	PCR	paired	ILLUMINA	Illumina NovaSeq 6000	Whole metagenomic sequencing	fastq	NM34_R1.fq.gz	NM34_R2.fq.gz
PRJNA656389	SAMN15871505	NM35	Bubalus bubalis digestive tract metagenome	WGS	METAGENOMIC	PCR	paired	ILLUMINA	Illumina NovaSeq 6000	Whole metagenomic sequencing	fastq	NM35_R1.fq.gz	NM35_R2.fq.gz
PRJNA656389	SAMN15871506	NM4	Bubalus bubalis digestive tract metagenome	WGS	METAGENOMIC	PCR	paired	ILLUMINA	Illumina NovaSeq 6000	Whole metagenomic sequencing	fastq	NM4_R1.fq.gz	NM4_R2.fq.gz
PRJNA656389	SAMN15871507	NM5	Bubalus bubalis digestive tract metagenome	WGS	METAGENOMIC	PCR	paired	ILLUMINA	Illumina NovaSeq 6000	Whole metagenomic sequencing	fastq	NM5_R1.fq.gz	NM5_R2.fq.gz
PRJNA656389	SAMN15871508	NM6	Bubalus bubalis digestive tract metagenome	WGS	METAGENOMIC	PCR	paired	ILLUMINA	Illumina NovaSeq 6000	Whole metagenomic sequencing	fastq	NM6_R1.fq.gz	NM6_R2.fq.gz
PRJNA656389	SAMN15871509	NM8	Bubalus bubalis digestive tract metagenome	WGS	METAGENOMIC	PCR	paired	ILLUMINA	Illumina NovaSeq 6000	Whole metagenomic sequencing	fastq	NM8_R1.fq.gz	NM8_R2.fq.gz
PRJNA656389	SAMN15871510	NM9	Bubalus bubalis digestive tract metagenome	WGS	METAGENOMIC	PCR	paired	ILLUMINA	Illumina NovaSeq 6000	Whole metagenomic sequencing	fastq	NM9_R1.fq.gz	NM9_R2.fq.gz
PRJNA656389	SAMN15871511	NM1	Bubalus bubalis digestive tract metagenome	WGS	METAGENOMIC	PCR	paired	ILLUMINA	Illumina NovaSeq 6000	Whole metagenomic sequencing	fastq	NM1_R1.fq.gz	NM1_R2.fq.gz
PRJNA656389	SAMN15871512	NM10	Bubalus bubalis digestive tract metagenome	WGS	METAGENOMIC	PCR	paired	ILLUMINA	Illumina NovaSeq 6000	Whole metagenomic sequencing	fastq	NM10_R1.fq.gz	NM10_R2.fq.gz
PRJNA656389	SAMN15871513	NM12	Bubalus bubalis digestive tract metagenome	WGS	METAGENOMIC	PCR	paired	ILLUMINA	Illumina NovaSeq 6000	Whole metagenomic sequencing	fastq	NM12_R1.fq.gz	NM12_R2.fq.gz
PRJNA656389	SAMN15871514	NM7	Bubalus bubalis digestive tract metagenome	WGS	METAGENOMIC	PCR	paired	ILLUMINA	Illumina NovaSeq 6000	Whole metagenomic sequencing	fastq	NM7_R1.fq.gz	NM7_R2.fq.gz
PRJNA656389	SAMN15871515	NJ15	Bubalus bubalis digestive tract metagenome	WGS	METAGENOMIC	PCR	paired	ILLUMINA	Illumina NovaSeq 6000	Whole metagenomic sequencing	fastq	NJ15_R1.fq.gz	NJ15_R2.fq.gz
PRJNA656389	SAMN15871516	NJ17	Bubalus bubalis digestive tract metagenome	WGS	METAGENOMIC	PCR	paired	ILLUMINA	Illumina NovaSeq 6000	Whole metagenomic sequencing	fastq	NJ17_R1.fq.gz	NJ17_R2.fq.gz
PRJNA656389	SAMN15871517	NJ18	Bubalus bubalis digestive tract metagenome	WGS	METAGENOMIC	PCR	paired	ILLUMINA	Illumina NovaSeq 6000	Whole metagenomic sequencing	fastq	NJ18_R1.fq.gz	NJ18_R2.fq.gz
PRJNA656389	SAMN15871518	NJ19	Bubalus bubalis digestive tract metagenome	WGS	METAGENOMIC	PCR	paired	ILLUMINA	Illumina NovaSeq 6000	Whole metagenomic sequencing	fastq	NJ19_R1.fq.gz	NJ19_R2.fq.gz
PRJNA656389	SAMN15871519	NJ22	Bubalus bubalis digestive tract metagenome	WGS	METAGENOMIC	PCR	paired	ILLUMINA	Illumina NovaSeq 6000	Whole metagenomic sequencing	fastq	NJ22_R1.fq.gz	NJ22_R2.fq.gz
PRJNA656389	SAMN15871520	NJ25	Bubalus bubalis digestive tract metagenome	WGS	METAGENOMIC	PCR	paired	ILLUMINA	Illumina NovaSeq 6000	Whole metagenomic sequencing	fastq	NJ25_R1.fq.gz	NJ25_R2.fq.gz
PRJNA656389	SAMN15871521	NJ27	Bubalus bubalis digestive tract metagenome	WGS	METAGENOMIC	PCR	paired	ILLUMINA	Illumina NovaSeq 6000	Whole metagenomic sequencing	fastq	NJ27_R1.fq.gz	NJ27_R2.fq.gz
PRJNA656389	SAMN15871522	NJ33	Bubalus bubalis digestive tract metagenome	WGS	METAGENOMIC	PCR	paired	ILLUMINA	Illumina NovaSeq 6000	Whole metagenomic sequencing	fastq	NJ33_R1.fq.gz	NJ33_R2.fq.gz
PRJNA656389	SAMN15871523	NJ1	Bubalus bubalis digestive tract metagenome	WGS	METAGENOMIC	PCR	paired	ILLUMINA	Illumina NovaSeq 6000	Whole metagenomic sequencing	fastq	NJ1_R1.fq.gz	NJ1_R2.fq.gz
PRJNA656389	SAMN15871524	NJ11	Bubalus bubalis digestive tract metagenome	WGS	METAGENOMIC	PCR	paired	ILLUMINA	Illumina NovaSeq 6000	Whole metagenomic sequencing	fastq	NJ11_R1.fq.gz	NJ11_R2.fq.gz
PRJNA656389	SAMN15871525	NJ12	Bubalus bubalis digestive tract metagenome	WGS	METAGENOMIC	PCR	paired	ILLUMINA	Illumina NovaSeq 6000	Whole metagenomic sequencing	fastq	NJ12_R1.fq.gz	NJ12_R2.fq.gz
PRJNA656389	SAMN15871526	NJ14	Bubalus bubalis digestive tract metagenome	WGS	METAGENOMIC	PCR	paired	ILLUMINA	Illumina NovaSeq 6000	Whole metagenomic sequencing	fastq	NJ14_R1.fq.gz	NJ14_R2.fq.gz
PRJNA656389	SAMN15871527	NJ16	Bubalus bubalis digestive tract metagenome	WGS	METAGENOMIC	PCR	paired	ILLUMINA	Illumina NovaSeq 6000	Whole metagenomic sequencing	fastq	NJ16_R1.fq.gz	NJ16_R2.fq.gz
PRJNA656389	SAMN15871528	NJ2	Bubalus bubalis digestive tract metagenome	WGS	METAGENOMIC	PCR	paired	ILLUMINA	Illumina NovaSeq 6000	Whole metagenomic sequencing	fastq	NJ2_R1.fq.gz	NJ2_R2.fq.gz
PRJNA656389	SAMN15871529	NJ21	Bubalus bubalis digestive tract metagenome	WGS	METAGENOMIC	PCR	paired	ILLUMINA	Illumina NovaSeq 6000	Whole metagenomic sequencing	fastq	NJ21_R1.fq.gz	NJ21_R2.fq.gz
PRJNA656389	SAMN15871530	NJ24	Bubalus bubalis digestive tract metagenome	WGS	METAGENOMIC	PCR	paired	ILLUMINA	Illumina NovaSeq 6000	Whole metagenomic sequencing	fastq	NJ24_R1.fq.gz	NJ24_R2.fq.gz
PRJNA656389	SAMN15871531	NJ26	Bubalus bubalis digestive tract metagenome	WGS	METAGENOMIC	PCR	paired	ILLUMINA	Illumina NovaSeq 6000	Whole metagenomic sequencing	fastq	NJ26_R1.fq.gz	NJ26_R2.fq.gz
PRJNA656389	SAMN15871532	NJ28	Bubalus bubalis digestive tract metagenome	WGS	METAGENOMIC	PCR	paired	ILLUMINA	Illumina NovaSeq 6000	Whole metagenomic sequencing	fastq	NJ28_R1.fq.gz	NJ28_R2.fq.gz
PRJNA656389	SAMN15871533	NJ29	Bubalus bubalis digestive tract metagenome	WGS	METAGENOMIC	PCR	paired	ILLUMINA	Illumina NovaSeq 6000	Whole metagenomic sequencing	fastq	NJ29_R1.fq.gz	NJ29_R2.fq.gz
PRJNA656389	SAMN15871534	NJ30	Bubalus bubalis digestive tract metagenome	WGS	METAGENOMIC	PCR	paired	ILLUMINA	Illumina NovaSeq 6000	Whole metagenomic sequencing	fastq	NJ30_R1.fq.gz	NJ30_R2.fq.gz
PRJNA656389	SAMN15871535	NJ31	Bubalus bubalis digestive tract metagenome	WGS	METAGENOMIC	PCR	paired	ILLUMINA	Illumina NovaSeq 6000	Whole metagenomic sequencing	fastq	NJ31_R1.fq.gz	NJ31_R2.fq.gz
PRJNA656389	SAMN15871536	NJ32	Bubalus bubalis digestive tract metagenome	WGS	METAGENOMIC	PCR	paired	ILLUMINA	Illumina NovaSeq 6000	Whole metagenomic sequencing	fastq	NJ32_R1.fq.gz	NJ32_R2.fq.gz
PRJNA656389	SAMN15871537	NJ34	Bubalus bubalis digestive tract metagenome	WGS	METAGENOMIC	PCR	paired	ILLUMINA	Illumina NovaSeq 6000	Whole metagenomic sequencing	fastq	NJ34_R1.fq.gz	NJ34_R2.fq.gz
PRJNA656389	SAMN15871538	NJ35	Bubalus bubalis digestive tract metagenome	WGS	METAGENOMIC	PCR	paired	ILLUMINA	Illumina NovaSeq 6000	Whole metagenomic sequencing	fastq	NJ35_R1.fq.gz	NJ35_R2.fq.gz
PRJNA656389	SAMN15871539	NJ6	Bubalus bubalis digestive tract metagenome	WGS	METAGENOMIC	PCR	paired	ILLUMINA	Illumina NovaSeq 6000	Whole metagenomic sequencing	fastq	NJ6_R1.fq.gz	NJ6_R2.fq.gz
PRJNA656389	SAMN15871540	NJ9	Bubalus bubalis digestive tract metagenome	WGS	METAGENOMIC	PCR	paired	ILLUMINA	Illumina NovaSeq 6000	Whole metagenomic sequencing	fastq	NJ9_R1.fq.gz	NJ9_R2.fq.gz
PRJNA656389	SAMN15871541	NJ13	Bubalus bubalis digestive tract metagenome	WGS	METAGENOMIC	PCR	paired	ILLUMINA	Illumina NovaSeq 6000	Whole metagenomic sequencing	fastq	NJ13_R1.fq.gz	NJ13_R2.fq.gz
PRJNA656389	SAMN15871542	NJ4	Bubalus bubalis digestive tract metagenome	WGS	METAGENOMIC	PCR	paired	ILLUMINA	Illumina NovaSeq 6000	Whole metagenomic sequencing	fastq	NJ4_R1.fq.gz	NJ4_R2.fq.gz
PRJNA656389	SAMN15871543	NJ5	Bubalus bubalis digestive tract metagenome	WGS	METAGENOMIC	PCR	paired	ILLUMINA	Illumina NovaSeq 6000	Whole metagenomic sequencing	fastq	NJ5_R1.fq.gz	NJ5_R2.fq.gz
PRJNA656389	SAMN15871544	NJ7	Bubalus bubalis digestive tract metagenome	WGS	METAGENOMIC	PCR	paired	ILLUMINA	Illumina NovaSeq 6000	Whole metagenomic sequencing	fastq	NJ7_R1.fq.gz	NJ7_R2.fq.gz
PRJNA656389	SAMN15871545	NK15	Bubalus bubalis digestive tract metagenome	WGS	METAGENOMIC	PCR	paired	ILLUMINA	Illumina NovaSeq 6000	Whole metagenomic sequencing	fastq	NK15_R1.fq.gz	NK15_R2.fq.gz
PRJNA656389	SAMN15871546	NK30	Bubalus bubalis digestive tract metagenome	WGS	METAGENOMIC	PCR	paired	ILLUMINA	Illumina NovaSeq 6000	Whole metagenomic sequencing	fastq	NK30_R1.fq.gz	NK30_R2.fq.gz
PRJNA656389	SAMN15871547	NK33	Bubalus bubalis digestive tract metagenome	WGS	METAGENOMIC	PCR	paired	ILLUMINA	Illumina NovaSeq 6000	Whole metagenomic sequencing	fastq	NK33_R1.fq.gz	NK33_R2.fq.gz
PRJNA656389	SAMN15871548	NK1	Bubalus bubalis digestive tract metagenome	WGS	METAGENOMIC	PCR	paired	ILLUMINA	Illumina NovaSeq 6000	Whole metagenomic sequencing	fastq	NK1_R1.fq.gz	NK1_R2.fq.gz
PRJNA656389	SAMN15871549	NK13	Bubalus bubalis digestive tract metagenome	WGS	METAGENOMIC	PCR	paired	ILLUMINA	Illumina NovaSeq 6000	Whole metagenomic sequencing	fastq	NK13_R1.fq.gz	NK13_R2.fq.gz
PRJNA656389	SAMN15871550	NK17	Bubalus bubalis digestive tract metagenome	WGS	METAGENOMIC	PCR	paired	ILLUMINA	Illumina NovaSeq 6000	Whole metagenomic sequencing	fastq	NK17_R1.fq.gz	NK17_R2.fq.gz
PRJNA656389	SAMN15871551	NK21	Bubalus bubalis digestive tract metagenome	WGS	METAGENOMIC	PCR	paired	ILLUMINA	Illumina NovaSeq 6000	Whole metagenomic sequencing	fastq	NK21_R1.fq.gz	NK21_R2.fq.gz
PRJNA656389	SAMN15871552	NK22	Bubalus bubalis digestive tract metagenome	WGS	METAGENOMIC	PCR	paired	ILLUMINA	Illumina NovaSeq 6000	Whole metagenomic sequencing	fastq	NK22_R1.fq.gz	NK22_R2.fq.gz
PRJNA656389	SAMN15871553	NK26	Bubalus bubalis digestive tract metagenome	WGS	METAGENOMIC	PCR	paired	ILLUMINA	Illumina NovaSeq 6000	Whole metagenomic sequencing	fastq	NK26_R1.fq.gz	NK26_R2.fq.gz
PRJNA656389	SAMN15871554	NK29	Bubalus bubalis digestive tract metagenome	WGS	METAGENOMIC	PCR	paired	ILLUMINA	Illumina NovaSeq 6000	Whole metagenomic sequencing	fastq	NK29_R1.fq.gz	NK29_R2.fq.gz
PRJNA656389	SAMN15871555	NK3	Bubalus bubalis digestive tract metagenome	WGS	METAGENOMIC	PCR	paired	ILLUMINA	Illumina NovaSeq 6000	Whole metagenomic sequencing	fastq	NK3_R1.fq.gz	NK3_R2.fq.gz
PRJNA656389	SAMN15871556	NK32	Bubalus bubalis digestive tract metagenome	WGS	METAGENOMIC	PCR	paired	ILLUMINA	Illumina NovaSeq 6000	Whole metagenomic sequencing	fastq	NK32_R1.fq.gz	NK32_R2.fq.gz
PRJNA656389	SAMN15871557	NK34	Bubalus bubalis digestive tract metagenome	WGS	METAGENOMIC	PCR	paired	ILLUMINA	Illumina NovaSeq 6000	Whole metagenomic sequencing	fastq	NK34_R1.fq.gz	NK34_R2.fq.gz
PRJNA656389	SAMN15871558	NK35	Bubalus bubalis digestive tract metagenome	WGS	METAGENOMIC	PCR	paired	ILLUMINA	Illumina NovaSeq 6000	Whole metagenomic sequencing	fastq	NK35_R1.fq.gz	NK35_R2.fq.gz
PRJNA656389	SAMN15871559	NK4	Bubalus bubalis digestive tract metagenome	WGS	METAGENOMIC	PCR	paired	ILLUMINA	Illumina NovaSeq 6000	Whole metagenomic sequencing	fastq	NK4_R1.fq.gz	NK4_R2.fq.gz
PRJNA656389	SAMN15871560	NK6	Bubalus bubalis digestive tract metagenome	WGS	METAGENOMIC	PCR	paired	ILLUMINA	Illumina NovaSeq 6000	Whole metagenomic sequencing	fastq	NK6_R1.fq.gz	NK6_R2.fq.gz
PRJNA656389	SAMN15871561	NK10	Bubalus bubalis digestive tract metagenome	WGS	METAGENOMIC	PCR	paired	ILLUMINA	Illumina NovaSeq 6000	Whole metagenomic sequencing	fastq	NK10_R1.fq.gz	NK10_R2.fq.gz
PRJNA656389	SAMN15871562	NK11	Bubalus bubalis digestive tract metagenome	WGS	METAGENOMIC	PCR	paired	ILLUMINA	Illumina NovaSeq 6000	Whole metagenomic sequencing	fastq	NK11_R1.fq.gz	NK11_R2.fq.gz
PRJNA656389	SAMN15871563	NK12	Bubalus bubalis digestive tract metagenome	WGS	METAGENOMIC	PCR	paired	ILLUMINA	Illumina NovaSeq 6000	Whole metagenomic sequencing	fastq	NK12_R1.fq.gz	NK12_R2.fq.gz
PRJNA656389	SAMN15871564	NK18	Bubalus bubalis digestive tract metagenome	WGS	METAGENOMIC	PCR	paired	ILLUMINA	Illumina NovaSeq 6000	Whole metagenomic sequencing	fastq	NK18_R1.fq.gz	NK18_R2.fq.gz
PRJNA656389	SAMN15871565	NK2	Bubalus bubalis digestive tract metagenome	WGS	METAGENOMIC	PCR	paired	ILLUMINA	Illumina NovaSeq 6000	Whole metagenomic sequencing	fastq	NK2_R1.fq.gz	NK2_R2.fq.gz
PRJNA656389	SAMN15871566	NK5	Bubalus bubalis digestive tract metagenome	WGS	METAGENOMIC	PCR	paired	ILLUMINA	Illumina NovaSeq 6000	Whole metagenomic sequencing	fastq	NK5_R1.fq.gz	NK5_R2.fq.gz
PRJNA656389	SAMN15871567	NK7	Bubalus bubalis digestive tract metagenome	WGS	METAGENOMIC	PCR	paired	ILLUMINA	Illumina NovaSeq 6000	Whole metagenomic sequencing	fastq	NK7_R1.fq.gz	NK7_R2.fq.gz
PRJNA656389	SAMN15871568	NK9	Bubalus bubalis digestive tract metagenome	WGS	METAGENOMIC	PCR	paired	ILLUMINA	Illumina NovaSeq 6000	Whole metagenomic sequencing	fastq	NK9_R1.fq.gz	NK9_R2.fq.gz

## Sheet: Supplementary Table 8
sample_ID	sequences				bases
	raw	clean	removed host	passed rate	raw	clean	removed host	passed rate
ABCN10	41367840	37676958	37646988	0.999205	6205176000	5618183187	5613721922	0.999206
ABCN11	46853896	43317364	787453	0.0181787	7028084400	6467200018	115265832	0.0178231
ABCN12	58019938	53043377	762942	0.0143834	8702990700	7908575326	111263088	0.0140687
ABCN13	53894868	49688906	788303	0.0158648	8084230200	7414563736	115203910	0.0155375
ABCN14	56570314	52625722	909281	0.0172783	8485547100	7857352996	133206369	0.0169531
ABCN15	57159006	52291045	773128	0.0147851	8573850900	7798610851	112839549	0.0144692
ABCN16	58602028	54165167	912327	0.0168434	8790304200	8083470624	133456717	0.0165098
ABCN17	50612262	46549496	728947	0.0156596	7591839300	6947115244	106528722	0.0153342
ABCN18	63341296	58738730	58382887	0.993942	9501194400	8767553163	8714521384	0.993951
ABCN19	54538698	50684409	910754	0.0179691	8180804700	7569487241	133520751	0.0176393
ABCN1	53071632	48985809	800615	0.0163438	7960744800	7310705911	117105445	0.0160183
ABCN20	67138976	62006465	1029777	0.0166076	10070846400	9256048019	150656748	0.0162766
ABCN21	60603546	56067549	879700	0.01569	9090531900	8370314317	128694050	0.0153751
ABCN22	52717772	48561536	733131	0.0150969	7907665800	7245743029	107100042	0.0147811
ABCN23	56411516	51341821	704711	0.0137259	8461727400	7657359086	102770489	0.0134211
ABCN24	53209688	48787887	829139	0.0169948	7981453200	7278726731	121228888	0.0166552
ABCN25	60669088	55908271	843503	0.0150873	9100363200	8343491978	123268241	0.0147742
ABCN26	45442272	41630395	623260	0.0149713	6816340800	6211621867	90902195	0.0146342
ABCN27	55530006	50766822	725349	0.0142879	8329500900	7573669310	105746651	0.0139624
ABCN28	50549808	46858656	810501	0.0172967	7582471200	6996062912	118628071	0.0169564
ABCN29	54965342	50340339	744480	0.0147889	8244801300	7507800002	108624649	0.0144682
ABCN2	46860504	42952152	42255292	0.983776	7029075600	6406958334	6305079231	0.984099
ABCN30	58262010	53238952	778668	0.0146259	8739301500	7938119561	113630713	0.0143146
ABCN31	39512606	36531532	36504278	0.999254	5926890900	5452182188	5448120446	0.999255
ABCN32	56221268	51890042	830360	0.0160023	8433190200	7744131329	121490530	0.0156881
ABCN33	53592372	48680813	742298	0.0152483	8038855800	7255920357	108272983	0.014922
ABCN3	58866188	54065883	840883	0.0155529	8829928200	8067145064	122878544	0.015232
ABCN4	60463792	54966650	777796	0.0141503	9069568800	8192549982	113241429	0.0138225
ABCN5	48382572	44320898	613940	0.0138522	7257385800	6611240753	89530127	0.0135421
ABCN6	61940812	57356191	963390	0.0167966	9291121800	8561890114	140941467	0.0164615
ABCN7	41226504	38000961	37983027	0.999528	6183975600	5671139202	5668466806	0.999529
ABCN8	48801314	45054518	732356	0.0162549	7320197100	6725889473	107043264	0.0159151
ABCN9	44310858	40698942	631354	0.0155128	6646628700	6072013812	92300095	0.0152009
ABDN1	55686402	51090153	583165	0.0114144	8352960300	7620577147	84940449	0.0111462
ABGD10	55591690	51342283	888968	0.0173145	8338753500	7663863998	129949778	0.0169562
ABGD11	57132566	53570958	685494	0.012796	8569884900	8000186605	100501655	0.0125624
ABGD2	60115470	55212869	818205	0.0148191	9017320500	8237526288	119371367	0.0144912
ABGD3	70444446	64619725	1026086	0.0158788	10566666900	9642308185	149939812	0.0155502
ABGD4	62030384	57045947	988284	0.0173244	9304557600	8511254152	144680399	0.0169987
ABGD5	51604522	47472535	778655	0.0164022	7740678300	7083582172	113925221	0.016083
ABGD6	45815746	41967129	631733	0.015053	6872361900	6260919488	92216622	0.0147289
ABGD7	51319398	47235332	779184	0.0164958	7697909700	7050250647	113834726	0.0161462
ABGD8	50866212	46770627	778040	0.0166352	7629931800	6977304157	113732993	0.0163004
ABGD9	45400366	41384397	1425120	0.0344362	6810054900	6171864872	205648750	0.0333204
BLJ10	56933846	53504914	53487224	0.999669	8540076900	7988527828	7985891231	0.99967
BLJ11	57474832	54030694	54021741	0.999834	8621224800	8067969490	8066637077	0.999835
BLJ12	57481890	53912603	53372256	0.989977	8622283500	8048408780	7967842244	0.98999
BLJ13	58405798	55138940	54099957	0.981157	8760869700	8234774115	8079772502	0.981177
BLJ14	65033234	61169227	60578311	0.99034	9754985100	9134083588	9045945243	0.990351
BLJ15	58012840	54690799	54676881	0.999746	8701926000	8167193837	8165120385	0.999746
BLJ16	57151554	53760319	53475027	0.994693	8572733100	8026563957	7984015493	0.994699
BLJ17	59893652	56341497	56318286	0.999588	8984047800	8412288315	8408829379	0.999589
BLJ18	61394732	57789470	57717336	0.998752	9209209800	8630109059	8619355018	0.998754
BLJ19	64150638	60251687	59331701	0.984731	9622595700	8994759525	8857580093	0.984749
BLJ1	59667088	56193088	55626755	0.989922	8950063200	8392345312	8307850975	0.989932
BLJ20	44041216	41550925	40550346	0.975919	6606182400	6205726752	6056451077	0.975945
BLJ21	51726920	48837627	48758196	0.998374	7759038000	7293567897	7281721683	0.998376
BLJ22	56674700	53422094	53123123	0.994404	8501205000	7977160137	7932561058	0.994409
BLJ23	61317654	57429338	57414437	0.999741	9197648100	8572238438	8570022029	0.999741
BLJ24	63471364	60042768	59966349	0.998727	9520704600	8969025712	8957625416	0.998729
BLJ25	57966936	54640943	54561510	0.998546	8695040400	8160120338	8148273209	0.998548
BLJ26	49153424	46531915	46455345	0.998354	7373013600	6950574083	6939149788	0.998356
BLJ27	60816648	57269446	54088004	0.944448	9122497200	8551346419	8076848441	0.944512
BLJ28	56373908	53021720	43359489	0.817768	8456086200	7916744981	6475383178	0.817935
BLJ29	53119644	50060419	50044833	0.999689	7967946600	7477417370	7475095414	0.999689
BLJ30	52951650	49864837	49854497	0.999793	7942747500	7446295355	7444755487	0.999793
BLJ31	54710600	51513585	51502679	0.999788	8206590000	7692487645	7690863725	0.999789
BLJ32	55767694	52474678	51589826	0.983138	8365154100	7835526721	7703547165	0.983156
BLJ33	64938346	61237179	60557912	0.988908	9740751900	9145579853	9044245285	0.98892
BLJ35	64312730	60550372	51624781	0.852592	9646909500	9042708488	7710790591	0.852708
BLJ5	50004078	47030019	47003708	0.999441	7500611700	7022749306	7018827279	0.999442
BLJ6	52845298	49656916	49639880	0.999657	7926794700	7413830496	7411292865	0.999658
BLJ7	61741824	58497266	58123492	0.99361	9261273600	8738627895	8682867107	0.993619
BLJ8	66259374	62434547	62344973	0.998565	9938906100	9322240023	9308882300	0.998567
BLJ9	57177088	53865306	53107580	0.985933	8576563200	8044560712	7931544623	0.985951
FGD10_S137_L002	52766860	49822129	49791952	0.999394	7967795860	7497025030	7492489757	0.999395
FGD11_S138_L002	52058906	48952478	48935596	0.999655	7860894806	7364932566	7362395998	0.999656
FGD12_S139_L002	54330600	51529919	51447356	0.998398	8203920600	7756497502	7744083197	0.998399
FGD13_S140_L002	57691646	54574856	54563427	0.999791	8711438546	8213131792	8211415105	0.999791
FGD14_S141_L002	53086742	49754876	49744088	0.999783	8016098042	7484244255	7482624876	0.999784
FGD1_S1_L003	50825636	46964142	46957895	0.999867	7674671036	7060546068	7059609899	0.999867
FGD2_S2_L003	52532244	48540798	48530545	0.999789	7932368844	7297186217	7295647819	0.999789
FGD3_S3_L003	47992286	43909340	43574345	0.992371	7246835186	6594866814	6544596123	0.992377
FGD4_S4_L003	52033604	48105973	48103172	0.999942	7857074204	7232162655	7231744535	0.999942
FGD5_S5_L003	50299546	46197520	46194092	0.999926	7595231446	6943093501	6942581139	0.999926
FGD6_S6_L003	50806340	46778354	46776226	0.999955	7671757340	7029551187	7029233490	0.999955
FGD7_S7_L003	52929982	48951187	48945757	0.999889	7992427282	7359177674	7358364545	0.99989
FGD8_S8_L003	48827102	45298072	45295203	0.999937	7372892402	6811395089	6810965904	0.999937
FGD9_S9_L003	51258132	47081428	46980938	0.997866	7739977932	7073048899	7057968772	0.997868
GBCM10_S177_L002	50214892	47303645	47250835	0.998884	7582448692	7118107832	7110172322	0.998885
GBCM11_S172_L002	51331146	48645209	48641142	0.999916	7751003046	7321507485	7320896442	0.999917
GBCM1_S175_L002	55429522	52307964	52300780	0.999863	8369857822	7872696568	7871617106	0.999863
GBCM2_S178_L002	53937306	50662620	50430915	0.995427	8144533206	7623131043	7588326384	0.995434
GBCM3_S170_L002	56034066	52894391	52868511	0.999511	8461143966	7959292855	7955403925	0.999511
GBCM4_S168_L002	53130240	49883243	49875690	0.999849	8022666240	7503807481	7502674260	0.999849
GBCM5_S173_L002	55583204	52223144	52217869	0.999899	8393063804	7856878447	7856086612	0.999899
GBCM6_S174_L002	50469930	47721194	47711730	0.999802	7620959430	7181219945	7179798539	0.999802
GBCM7_S176_L002	55739472	52604013	52596898	0.999865	8416660272	7917223448	7916154900	0.999865
GBCM8_S171_L002	50257720	47238688	47234477	0.999911	7588915720	7105923147	7105290807	0.999911
GBCM9_S169_L002	51859768	49010343	49004888	0.999889	7830824968	7375321939	7374503033	0.999889
GBS1_S179_L002	56573634	52784871	52326400	0.991314	8542618734	7938204144	7869358252	0.991327
GBS2_S180_L002	60257284	56779405	56380079	0.992967	9098849884	8543792265	8483802475	0.992979
GBS3_S181_L002	49002432	44739805	44257741	0.989225	7399367232	6721053939	6648692481	0.989234
GBS4_S182_L002	57195528	53759716	52833693	0.982775	8636524728	8088309290	7949111888	0.98279
GFB1	59552652	55456793	39144734	0.70586	8932897800	8286658415	5852140901	0.706212
GFL1	53438892	49751674	49598460	0.99692	8015833800	7432808600	7409954308	0.996925
GFW1	52109726	48900538	48578296	0.99341	7816458900	7310410243	7262306092	0.99342
HCN10	57710026	53660622	53320110	0.993654	8656503900	8016379672	7965590945	0.993664
HCN11	57722150	53839223	53706501	0.997535	8658322500	8043500316	8023695161	0.997538
HCN12	47929910	44463334	44173278	0.993477	7189486500	6646529047	6603215366	0.993483
HCN13	54326566	50364248	50344434	0.999607	8148984900	7521711746	7518761069	0.999608
HCN14	61112564	56641103	56398572	0.995718	9166884600	8455113642	8418952963	0.995723
HCN15	57966698	54347597	54279104	0.99874	8695004700	8113818686	8103601927	0.998741
HCN17	51402932	48250649	48216350	0.999289	7710439800	7204309361	7199191674	0.99929
HCN18	55068560	51194915	50817226	0.992623	8260284000	7644480416	7588141541	0.99263
HCN19	54325546	50554186	46812809	0.925993	8148831900	7549081984	6991631800	0.926157
HCN1	61026028	57065768	56787517	0.995124	9153904200	8525516485	8484002238	0.995131
HCN20	65720818	61133543	60819010	0.994855	9858122700	9129609552	9082714958	0.994863
HCN21	45870958	42528278	42349365	0.995793	6880643700	6356789102	6330078621	0.995798
HCN22	54471820	51395169	51339811	0.998923	8170773000	7678353967	7670095909	0.998925
HCN23	45691816	42827161	42764996	0.998548	6853772400	6403935980	6394651712	0.99855
HCN24	54411536	50749604	50726816	0.999551	8161730400	7586848660	7583448757	0.999552
HCN25	45469696	42276721	42153534	0.997086	6820454400	6319881785	6301488960	0.99709
HCN26	44903462	42277780	42120458	0.996279	6735519300	6315145377	6291676889	0.996284
HCN27	67166664	62775398	62095670	0.989172	10074999600	9375823527	9274422165	0.989185
HCN28	60103164	55773444	55618912	0.997229	9015474600	8329849621	8306799479	0.997233
HCN29	67843090	62920249	62443564	0.992424	10176463500	9395472799	9324362722	0.992431
HCN2	60134904	56004556	55790791	0.996183	9020235600	8367524251	8335634508	0.996189
HCN30	53017482	49399670	49031613	0.992549	7952622300	7384979568	7330016151	0.992557
HCN31	62600440	58108500	57921849	0.996788	9390066000	8677808462	8649967075	0.996792
HCN3	72638698	67906497	67822103	0.998757	10895804700	10147466717	10134872276	0.998759
HCN4	54850962	51150842	51120870	0.999414	8227644300	7642997121	7638528016	0.999415
HCN5	67620798	62855402	62821000	0.999453	10143119700	9388185512	9383060635	0.999454
HCN6	67824046	63409336	63349022	0.999049	10173606900	9474514358	9465518793	0.999051
HCN7	65254838	61019377	60955706	0.998957	9788225700	9114661011	9105166643	0.998958
HCN8	51754444	47545984	46569741	0.979467	7763166600	7093192122	6947716922	0.979491
HCN9	69388568	64605085	63921467	0.989419	10408285200	9649950654	9547980472	0.989433
HDN10	51441716	47437040	47204956	0.995108	7716257400	7086276014	7051652479	0.995114
HDN1	58761930	54406655	53444320	0.982312	8814289500	8130825632	7987139633	0.982328
HDN2	70899136	65930596	65606770	0.995088	10634870400	9845837901	9797533394	0.995094
HDN3	68903718	64338965	64289996	0.999239	10335557700	9612420843	9605115168	0.99924
HDN4	75136910	68870607	67867651	0.985437	11270536500	10276482766	10127020560	0.985456
HDN5	58369534	54461420	54392943	0.998743	8755430100	8135279805	8125074631	0.998746
HDN6	48501562	44765660	44335854	0.990399	7275234300	6687311697	6623162489	0.990407
HDN7	55532300	48364957	48097098	0.994462	8329845000	7192923148	7153133660	0.994468
HDN8	72605242	67249823	65700833	0.976967	10890786300	10041145472	9810431832	0.977023
HDN9	61897112	56718049	56533299	0.996743	9284566800	8464863809	8437350808	0.99675
KCN10	45798678	41410961	41135861	0.993357	6869801700	6175463016	6134515946	0.993369
KCN11	70212430	66426401	66394105	0.999514	10531864500	9935256202	9930433974	0.999515
KCN12	49269700	43675430	43405716	0.993825	7390455000	6507692130	6467595139	0.993839
KCN13	48947148	43500874	42259702	0.971468	7342072200	6484583752	6299926723	0.971524
KCN14	41892390	35090168	33237683	0.947208	6283858500	5217468914	4942407729	0.947281
KCN15	47490688	42686699	42426785	0.993911	7123603200	6365210072	6326525978	0.993923
KCN16	44996930	40314176	39645512	0.983414	6749539500	6010199931	5910683044	0.983442
KCN17	48735494	43944768	43809770	0.996928	7310324100	6553352692	6533262995	0.996934
KCN18	54618610	49444831	49012436	0.991255	8192791500	7376289494	7311884670	0.991269
KCN19	50977704	47807945	47347981	0.990379	7646655600	7143161949	7074521459	0.990391
KCN20	48885520	44602289	44451178	0.996612	7332828000	6656648781	6634128365	0.996617
KCN21	52866484	47812066	47424938	0.991903	7929972600	7131747524	7074099693	0.991917
KCN22	55760732	50433376	49745423	0.986359	8364109800	7523241384	7420749000	0.986377
KCN23	60375994	54404668	54263169	0.997399	9056399100	8108255377	8087204937	0.997404
KCN25	71027176	66847452	66828465	0.999716	10654076400	9996936876	9994104602	0.999717
KCN26	57373580	52105616	51892228	0.995905	8606037000	7775063930	7743285483	0.995913
KCN27	42304132	36140545	36054990	0.997633	6345619800	5376599857	5363909730	0.99764
KCN29	60764630	57241057	55664934	0.972465	9114694500	8559245692	8323817933	0.972494
KCN2	44560534	40260587	40022582	0.994088	6684080100	6003452889	5968018842	0.994098
KCN30	50740406	44997798	40009258	0.889138	7611060900	6705407524	5963042416	0.889289
KCN31	53776894	50409375	50230332	0.996448	8066534100	7531494354	7504780943	0.996453
KCN32	49783538	44654914	44526961	0.997135	7467530700	6659465834	6640428361	0.997141
KCN33	53676722	50599549	50534672	0.998718	8051508300	7565577844	7555893773	0.99872
KCN35	47925618	43008393	42905621	0.99761	7188842700	6414509435	6399214221	0.997616
KCN3	45230618	40836680	40066215	0.981133	6784592700	6088993213	5974264101	0.981158
KCN4	46936472	42230952	36518966	0.864744	7040470800	6296886789	5446003855	0.864872
KCN5	49459486	44048942	43092406	0.978285	7418922900	6567693769	6425311458	0.978321
KCN6	67558080	63912145	60935830	0.953431	10133712000	9559186671	9114451622	0.953476
KCN7	52230646	47170991	47080249	0.998076	7834596900	7033445752	7019943441	0.99808
KCN8	50577700	45334900	45001403	0.992644	7586655000	6757336520	6707719902	0.992657
KCN9	41443558	37044921	36622089	0.988586	6216533700	5523448666	5460490827	0.988602
LCN10	53964012	49565518	49558554	0.999859	8094601800	7398061362	7397026421	0.99986
LCN11	48921928	44217938	44206757	0.999747	7338289200	6592542019	6590879764	0.999748
LCN12	46228188	41054950	40162216	0.978255	6934228200	6112923554	5983391896	0.97881
LCN13	43256442	39940562	39074227	0.978309	6488466300	5960539976	5833846893	0.978745
LCN14	42810132	39262772	39259929	0.999928	6421519800	5858850816	5858429628	0.999928
LCN15	52750478	45128268	45121767	0.999856	7912571700	6705635614	6704674772	0.999857
LCN16	59709922	52931402	3328847	0.0628898	8956488300	7883664486	486179962	0.0616693
LCN17	65594638	58131546	58126092	0.999906	9839195700	8657522919	8656715782	0.999907
LCN18	50959748	45952443	45948161	0.999907	7643962200	6851653428	6851018403	0.999907
LCN19	44588392	40271726	40268556	0.999921	6688258800	6004030478	6003561828	0.999922
LCN1	51942100	46840797	2370088	0.0505988	7791315000	6983737047	345393294	0.0494568
LCN20	51110626	45292106	45280584	0.999746	7666593900	6742928634	6741219495	0.999747
LCN21	61380574	55207518	55177957	0.999465	9207086100	8228967960	8224570142	0.999466
LCN22	55977656	49731915	49656050	0.998475	8396648400	7407440101	7396159512	0.998477
LCN23	55044550	49852472	2505590	0.0502601	8256682500	7433817769	364018477	0.0489679
LCN24	48392548	43763069	43704815	0.998669	7258882200	6525643003	6516966334	0.99867
LCN25	65422772	59244124	58105884	0.980787	9813415800	8835234640	8669752271	0.98127
LCN2	47860626	43458500	42150223	0.969896	7179093900	6482298881	6291373163	0.970547
LCN3	47547944	42897569	2266997	0.0528467	7132191600	6394091596	328915862	0.0514406
LCN4	43206284	38769685	2105178	0.0542996	6480942600	5778854934	306787511	0.0530879
LCN5	53501978	48873467	47651568	0.974999	8025296700	7292090870	7114785949	0.975685
LCN6	44312900	39858455	39855299	0.999921	6646935000	5940212970	5939746532	0.999921
LCN7	53177920	48593115	48586715	0.999868	7976688000	7250008230	7249057851	0.999869
LCN8	52671474	47622953	45971150	0.965315	7900721100	7101074540	6859663254	0.966004
LCN9	74352766	66126979	66120878	0.999908	11152914900	9849418739	9848516791	0.999908
M10	67486078	63138170	37062830	0.587011	10122911700	9427373384	5536221042	0.58725
M11	57286612	53906003	39443689	0.731712	8592991800	8053690027	5894905036	0.731951
M12	63812228	60452808	60062095	0.993537	9571834200	9035109749	8976790543	0.993545
M14	61830282	58323530	51596429	0.884659	9274542300	8714496800	7710364403	0.884774
M15	54616794	51671323	48097067	0.930827	8192519100	7722168126	7188614825	0.930906
M16	43075446	39084490	33034169	0.845199	6461316900	5825366852	4924306936	0.845321
M18	47881042	45145940	45138801	0.999842	7182156300	6745428793	6744365266	0.999842
M1	46086836	42870250	16426151	0.38316	6913025400	6397610981	2452686562	0.383375
M2	56638960	53372362	52959237	0.99226	8495844000	7972646405	7910992875	0.992267
M3	56998346	53059011	52801333	0.995144	8549751900	7918817511	7880403877	0.995149
M5	54810482	51169612	34826411	0.680607	8221572300	7638610017	5200610730	0.680832
M6	71295696	66485728	60550799	0.910734	10694354400	9924560282	9039608403	0.910832
M7	53822748	50351272	42091898	0.835965	8073412200	7518039602	6285997261	0.836122
M8	58691154	55552769	55414002	0.997502	8803673100	8301004724	8280293498	0.997505
M9	59280360	55992512	53939565	0.963335	8892054000	8367063681	8060664133	0.96338
MCN10	72489104	60166432	59777637	0.993538	10873365600	8928110543	8870500200	0.993547
MCN11	40106034	35199757	34674344	0.985073	6015905100	5247731629	5169528381	0.985098
MCN12	61796256	51290793	50913644	0.992647	9269438400	7611029000	7555045342	0.992644
MCN13	65557578	53327708	53217249	0.997929	9833636700	7903855253	7887479262	0.997928
MCN14	50123502	47097909	47092484	0.999885	7518525300	7031409376	7030602672	0.999885
MCN15	47732880	44833712	44606323	0.994928	7159932000	6693441792	6659534427	0.994934
MCN16	68036146	63912909	63905293	0.999881	10205421900	9540181382	9539050197	0.999881
MCN17	53875012	50283313	50206537	0.998473	8081251800	7501821303	7490387692	0.998476
MCN18	53796590	50625788	50532507	0.998157	8069488500	7559292472	7545382305	0.99816
MCN19	56712688	53331912	53255384	0.998565	8506903200	7964178406	7952768896	0.998567
MCN20	54326652	51227329	51219783	0.999853	8148997800	7648677158	7647554808	0.999853
MCN21	58216144	54571486	54467508	0.998095	8732421600	8146129596	8130625864	0.998097
MCN22	66738226	62448581	62336010	0.998197	10010733900	9319095687	9302327073	0.998201
MCN23	55981268	52724544	52681332	0.99918	8397190200	7872257893	7865818199	0.999182
MCN24	55589054	52195926	52183969	0.999771	8338358100	7791806956	7790027323	0.999772
MCN26	54231444	51136572	51074679	0.99879	8134716600	7637570739	7628340384	0.998791
MCN27	57307888	53952349	53686006	0.995063	8596183200	8056707603	8016980209	0.995069
MCN28	57321072	54076367	54034836	0.999232	8598160800	8076733421	8070540838	0.999233
MCN29	57081498	53915932	53878315	0.999302	8562224700	8053210727	8047601749	0.999304
MCN2	43018508	36970234	36795609	0.995277	6452776200	5506617345	5480680495	0.99529
MCN30	62726344	58913547	58442655	0.992007	9408951600	8794695475	8724479921	0.992016
MCN31	55568914	52103776	51874207	0.995594	8335337100	7777521953	7743299494	0.9956
MCN32	54792458	51674312	51658350	0.999691	8218868700	7716586058	7714208183	0.999692
MCN33	59005564	55618483	55529623	0.998402	8850834600	8306822988	8293570844	0.998405
MCN35	51244890	47409417	47401638	0.999836	7686733500	7078569566	7077414265	0.999837
MCN3	46884884	43197284	43170984	0.999391	7032732600	6450554687	6446640981	0.999393
MCN4	42215566	36572831	33667461	0.920559	6332334900	5448331145	5016069412	0.920662
MCN5	67723496	60341757	60281700	0.999005	10158524400	8992367197	8983437334	0.999007
MCN6	57713674	47353171	47299535	0.998867	8657051100	7016318904	7008348597	0.998864
MCN7	46419946	39348907	38546297	0.979603	6962991900	5854906509	5735754765	0.979649
MCN8	41677850	36205392	35977434	0.993704	6251677500	5393529265	5359630651	0.993715
MGD10_S151_L002	55934324	52749841	52745097	0.99991	8446082924	7938482031	7937770157	0.99991
MGD11_S152_L002	56777258	53568413	53564532	0.999928	8573365958	8062088003	8061505809	0.999928
MGD12_S153_L002	51905510	48928697	48921414	0.999851	7837732010	7362178460	7361084992	0.999851
MGD1_S142_L002	52339916	49510940	49477266	0.99932	7903327316	7451160452	7446098578	0.999321
MGD2_S143_L002	52265990	49305225	49284373	0.999577	7892164490	7420144395	7417010829	0.999578
MGD3_S144_L002	54453466	51672493	51655046	0.999662	8222473366	7778235988	7775613937	0.999663
MGD4_S145_L002	52342808	49572409	49565172	0.999854	7903764008	7461692834	7460606216	0.999854
MGD5_S146_L002	51856614	49037646	49033923	0.999924	7830348714	7380374947	7379816058	0.999924
MGD6_S147_L002	47512974	44875458	44822570	0.998821	7174459074	6752821044	6744869629	0.998823
MGD7_S148_L002	54357884	51161188	51149316	0.999768	8208040484	7696788531	7695006245	0.999768
MGD8_S149_L002	53853594	50865644	50839458	0.999485	8131892694	7655117144	7651180641	0.999486
MGD9_S150_L002	51612302	48676879	48670198	0.999863	7793457602	7326544643	7325541508	0.999863
NB10	54534394	48393900	46754734	0.966129	8180159100	7211766096	6967873543	0.966181
NB13	48231358	42550650	42152067	0.990633	7234703700	6341895870	6282613465	0.990652
NB14	44289446	38414742	35699898	0.929328	6643416900	5729332118	5325432467	0.929503
NB15	49282430	44402121	44402121	1	7392364500	6619206577	6619206577	1
NB16	59408246	53860329	53860329	1	8911236900	8024621714	8024621714	1
NB17	55666978	50517412	50517412	1	8350046700	7530820386	7530820386	1
NB18	53463974	48346145	48346145	1	8019596100	7205597929	7205597929	1
NB19	57825858	51225268	51225268	1	8673878700	7620887066	7620887066	1
NB1	115188270	95800041	93241021	0.973288	17278240500	14236067751	13856309483	0.973324
NB21	57997160	52926091	52926091	1	8699574000	7889899940	7889899940	1
NB22	69430736	62314220	62314220	1	10414610400	9283656994	9283656994	1
NB24	45893908	41252752	31997014	0.775633	6884086200	6151698921	4772861956	0.775861
NB25	59264136	54002690	54002690	1	8889620400	8049482595	8049482595	1
NB26	49979610	44802338	44802338	1	7496941500	6669325479	6669325479	1
NB27	58521816	52588865	52588865	1	8778272400	7828861434	7828861434	1
NB28	58210468	52917223	52917223	1	8731570200	7886959402	7886959402	1
NB29	60604452	54575315	54575315	1	9090667800	8127974976	8127974976	1
NB2	61946312	56412659	48597365	0.861462	9291946800	8416870437	7252240930	0.861632
NB30	66543770	59342257	59342257	1	9981565500	8838097622	8838097622	1
NB31	52896674	46408606	46408606	1	7934501100	6901123327	6901123327	1
NB32	51965530	47950148	47950148	1	7794829500	7160571152	7160571152	1
NB33	49173504	43412602	43412602	1	7376025600	6467961433	6467961433	1
NB34	60604762	55334437	55334437	1	9090714300	8253189839	8253189839	1
NB35	57549118	53292451	50019828	0.938591	8632367700	7959713362	7471514161	0.938666
NB3	54412262	49260297	44833789	0.91014	8161839300	7350308462	6690882205	0.910286
NB4	59457408	54146400	50136590	0.925945	8918611200	8079459014	7482103312	0.926065
NB5	76626004	64606950	62692981	0.970375	11493900600	9612401756	9328184521	0.970432
NB6	64686348	58984301	54965537	0.931867	9702952200	8800257474	8201504318	0.931962
NB7	45591198	39510988	38253748	0.96818	6838679700	5886556796	5699566203	0.968234
NB8	52753530	43582955	40173106	0.921762	7913029500	6481163292	5975007978	0.921904
NB9	47812372	42547501	37990681	0.8929	7171855800	6347889722	5670785211	0.893334
NJ11	51340906	45238690	36431516	0.805318	7701135900	6738379695	5428726658	0.805643
NJ12	52702016	46118857	28941221	0.627536	7905302400	6860735245	4308827463	0.628042
NJ13	49635302	41224743	34743595	0.842785	7445295300	6118781335	5158242643	0.843018
NJ14	51660012	44208299	15295746	0.345993	7749001800	6565881873	2273759775	0.346299
NJ15	49848556	43827816	37936581	0.865582	7477283400	6522367580	5646422968	0.865701
NJ16	48859956	44007347	8734664	0.198482	7328993400	6557268917	1302008239	0.19856
NJ17	61776284	56026315	56026315	1	9266442600	8345832348	8345832348	1
NJ18	52127342	47729134	47729134	1	7819101300	7114624011	7114624011	1
NJ19	61383916	56168172	56168172	1	9207587400	8369645559	8369645559	1
NJ1	50649178	45736686	10793421	0.23599	7597376700	6815742636	1608869835	0.236052
NJ21	52192634	47109626	23610866	0.50119	7828895100	7021786690	3521130277	0.501458
NJ22	47636968	43676338	43676338	1	7145545200	6511987408	6511987408	1
NJ24	48494252	44005177	26941293	0.61223	7274137800	6562397942	4021400767	0.612794
NJ25	50230264	44659257	44659257	1	7534539600	6648100767	6648100767	1
NJ26	48193806	43461853	4586844	0.105537	7229070900	6476510345	682992579	0.105457
NJ27	55162202	50483119	50483119	1	8274330300	7523455903	7523455903	1
NJ28	47119250	42613043	7563420	0.177491	7067887500	6350255954	1127025656	0.177477
NJ29	47243330	41437056	23263515	0.561418	7086499500	6165903552	3462922810	0.561625
NJ2	69786794	63776522	61521334	0.964639	10468019100	9517923649	9181850357	0.96469
NJ30	56284770	50475143	21785763	0.431614	8442715500	7520908779	3247409996	0.431784
NJ31	63882992	59054139	49440363	0.837204	9582448800	8815732326	7382080316	0.837376
NJ32	52882838	47493268	36179718	0.761786	7932425700	7070656988	5387348683	0.76193
NJ33	46332684	41065356	41065356	1	6949902600	6102133031	6102133031	1
NJ34	62898204	57599873	5555183	0.0964444	9434730600	8590108491	827398269	0.0963199
NJ35	57029328	52397765	7503731	0.143207	8554399200	7814786443	1119001660	0.14319
NJ4	43061550	36827728	7005942	0.190236	6459232500	5480384748	1043513735	0.190409
NJ5	60074722	48290349	8307059	0.172023	9011208300	7160554099	1230505647	0.171845
NJ6	50346386	45553734	11755305	0.258054	7551957900	6792210125	1753749615	0.2582
NJ7	48716010	41205364	35807236	0.868995	7307401500	6120737747	5319983232	0.869174
NJ9	49016308	44601139	26099139	0.585168	7352446200	6651442845	3894208700	0.585468
NK10	49836818	43406357	29642365	0.682904	7475522700	6451384312	4412731293	0.683998
NK11	63885598	54405815	6042227	0.111058	9582839700	8082892260	893661177	0.110562
NK12	49227288	39950166	2992433	0.0749041	7384093200	5911819629	437170774	0.0739486
NK13	47771148	41273336	4123771	0.0999137	7165672200	6139581617	611860755	0.0996584
NK15	50672214	45872775	45872775	1	7600832100	6837492857	6837492857	1
NK17	48075192	43189495	1720370	0.0398331	7211278800	6433813637	254764945	0.0395978
NK18	56392934	51271833	3890268	0.0758753	8458940100	7646677757	579019222	0.0757217
NK1	83851018	75472832	2640074	0.0349805	12577652700	11245013744	391645001	0.0348283
NK21	57349962	52783490	2657398	0.0503453	8602494300	7870076735	394048666	0.0500692
NK22	52369148	47235641	1797292	0.0380495	7855372200	7038066984	266728030	0.0378979
NK26	45917340	41364575	1416983	0.034256	6887601000	6164916866	210064206	0.0340741
NK29	53348200	48870833	45149	0.000923843	8002230000	7289127680	6694797	0.000918463
NK2	43851364	36952458	1225450	0.0331629	6577704600	5493415954	181007114	0.0329498
NK30	46958858	42420725	42420725	1	7043828700	6315705138	6315705138	1
NK32	59327954	53310538	11249814	0.211024	8899193100	7941901266	1675876604	0.211017
NK33	54442150	49932428	49932428	1	8166322500	7442928182	7442928182	1
NK34	61542286	56202714	2077354	0.0369618	9231342900	8380559655	308162877	0.0367712
NK35	60679894	55278465	2021870	0.0365761	9101984100	8241349295	299863304	0.0363852
NK3	47192962	42513222	1606339	0.0377845	7078944300	6333503586	237975098	0.037574
NK4	53651600	48224672	2918119	0.0605109	8047740000	7185013071	433759056	0.06037
NK5	437838622	354049297	14279552	0.0403321	65675793300	52527733685	2107627026	0.0401241
NK6	53153200	47755553	9188907	0.192415	7972980000	7116881757	1369987471	0.192498
NK7	56299566	43452707	1826331	0.0420303	8444934900	6422718710	266863964	0.04155
NK9	68035278	55885385	2111765	0.0377874	10205291700	8297154478	311384203	0.037529
NL10	50917474	45327639	45327639	1	7637621100	6758889567	6758889567	1
NL12	58492066	54131271	54131271	1	8773809900	8080323902	8080323902	1
NL13	67722078	61013109	61013109	1	10158311700	9100286598	9100286598	1
NL14	53025384	47666378	47175863	0.989709	7953807600	7108409154	7035420012	0.989732
NL15	55963098	50141544	50141544	1	8394464700	7477577650	7477577650	1
NL16	55539008	50388753	50388753	1	8330851200	7521543769	7521543769	1
NL17	51455474	47255237	47255237	1	7718321100	7055668215	7055668215	1
NL18	48557184	42922740	42922740	1	7283577600	6381858838	6381858838	1
NL19	55784618	51534268	50089818	0.971971	8367692700	7694482881	7481827146	0.972363
NL1	346802890	287150588	283284818	0.986537	52020433500	42693423001	42119837542	0.986565
NL21	61715014	55938891	51992610	0.929454	9257252100	8332063432	7766653256	0.93214
NL22	57196522	53012228	50355972	0.949894	8579478300	7918654158	7527753179	0.950635
NL24	54624710	49275548	48764402	0.989627	8193706500	7342367278	7266292354	0.989639
NL25	57613012	52700822	50110994	0.950858	8641951800	7858387254	7485279784	0.952521
NL26	56955112	52838534	50336048	0.952639	8543266800	7885286422	7518359468	0.953467
NL27	54778298	50157568	49185027	0.98061	8216744700	7482485081	7340002392	0.980958
NL28	52823428	48428310	48311778	0.997594	7923514200	7223835460	7206476606	0.997597
NL29	53434768	49336401	1306137	0.0264741	8015215200	7367589688	191995051	0.0260594
NL2	61966578	55951512	2525950	0.0451453	9294986700	8349127916	367868426	0.0440607
NL31	51205074	47551261	45781354	0.962779	7680761100	7105740243	6846278915	0.963486
NL32	58520384	53074511	49530168	0.933219	8778057600	7907544863	7399683844	0.935775
NL33	53567008	48939411	46248380	0.945013	8035051200	7300342262	6911277803	0.946706
NL34	43269252	36671433	36498410	0.995282	6490387800	5462034784	5436324688	0.995293
NL35	58728678	54242945	53575437	0.987694	8809301700	8101553601	8001999564	0.987712
NL3	61902018	56493313	56074824	0.992592	9285302700	8430248866	8367903110	0.992605
NL4	52627792	48017621	47943055	0.998447	7894168800	7167690772	7156585040	0.998451
NL5	57865506	52724575	52539228	0.996485	8679825900	7870780123	7843163136	0.996491
NL7	52317514	47674236	47555520	0.99751	7847627100	7112382441	7094701872	0.997514
NL8	45553192	37483249	36282977	0.967978	6832978800	5571274237	5393220704	0.968041
NL9	44583170	37624527	36322950	0.965406	6687475500	5601076087	5407683634	0.965472
NM10	43825580	38193666	21216741	0.555504	6573837000	5684161982	3158548480	0.555675
NM12	45214076	39355560	11367211	0.288834	6782111400	5853028875	1691192595	0.288943
NM14	49086740	44205922	6298884	0.14249	7363011000	6586071269	938339304	0.142473
NM15	66737006	61034949	28933553	0.474049	10010550900	9112460634	4328487607	0.475008
NM16	47436562	42880282	5569825	0.129892	7115484300	6391055920	830249947	0.129908
NM17	58676324	54050660	37904890	0.701284	8801448600	8063779853	5663599104	0.70235
NM18	53659802	48666057	32248610	0.662651	8048970300	7248438399	4814480040	0.664209
NM19	49483788	44532920	10932819	0.2455	7422568200	6627336590	1634091687	0.246568
NM1	46702010	39244794	11654308	0.296964	7005301500	5825118982	1729533165	0.29691
NM21	65499342	59038378	20581717	0.348616	9824901300	8798186402	3068674114	0.348785
NM22	46391054	41450788	36351372	0.876977	6958658100	6176402681	5417403530	0.877113
NM24	63615224	57527742	37111688	0.645109	9542283600	8577124724	5535568393	0.645387
NM25	48416858	43799016	42331369	0.966491	7262528700	6530288424	6311730716	0.966532
NM26	54147332	48732650	18289444	0.375302	8122099800	7259904836	2725735639	0.375451
NM27	56830596	51279054	16613093	0.323974	8524589400	7636277058	2484130172	0.325306
NM28	49711080	44657387	42385908	0.949135	7456662000	6659191176	6320919826	0.949202
NM29	45584140	40933488	33170922	0.810361	6837621000	6097610035	4942511251	0.810565
NM2	52503286	48043666	38724724	0.806032	7875492900	7168242632	5779524444	0.806268
NM30	51630282	45668142	9592517	0.210048	7744542300	6795885001	1426668185	0.209931
NM31	63716186	58848920	52643341	0.894551	9557427900	8786600945	7861132142	0.894673
NM32	59899772	54886709	2476549	0.0451211	8984965800	8191958786	357208060	0.0436047
NM33	54494828	49381354	10295241	0.208484	8174224200	7351480109	1538778166	0.209315
NM34	53837246	49388428	8549148	0.1731	8075586900	7368723329	1275536278	0.173101
NM35	58551716	53479132	11049617	0.206615	8782757400	7973947492	1648000348	0.206673
NM3	59230400	53970329	45579761	0.844534	8884560000	8053291394	6802576685	0.844695
NM4	58171524	53083787	47480525	0.894445	8725728600	7921016896	7086338113	0.894625
NM5	49233208	44864533	32774925	0.730531	7384981200	6693060765	4891308187	0.730803
NM6	50395088	45758784	43453424	0.949619	7559263200	6827921097	6484488916	0.949702
NM7	52342370	42130874	40397995	0.958869	7851355500	6251340299	5994670417	0.958942
NM8	49325108	43330396	37066588	0.855441	7398766200	6455315567	5524306336	0.855776
NM9	46072550	41362161	10341467	0.250022	6910882500	6161447106	1541064741	0.250114
NW10	59169274	54769614	26277249	0.479778	8875391100	8176592945	3928466299	0.480453
NW12	57198092	52868972	25027275	0.473383	8579713800	7889833957	3740815985	0.474131
NW13	59056408	52434548	24230176	0.462103	8858461200	7813505274	3625608049	0.464018
NW15	59106002	54013742	25602695	0.474003	8865900300	8055485479	3827795155	0.475179
NW16	63975362	58082360	27337402	0.470666	9596304300	8652526688	4087061955	0.472355
NW18	47150832	41468764	25892937	0.624396	7072624800	6171629497	3865690433	0.626365
NW19	53523552	47315951	21418156	0.452662	8028532800	7049723613	3202265279	0.45424
NW21	58856636	53636145	25463968	0.474754	8828495400	7997852399	3806487537	0.475939
NW24	55941328	50795337	23079785	0.454368	8391199200	7569866689	3450109771	0.455769
NW25	50974048	46502461	21985065	0.472772	7646107200	6932637940	3287074311	0.474145
NW26	52596078	48351359	22953637	0.474726	7889411700	7214569456	3430371745	0.475478
NW27	53967734	48956119	23019473	0.470206	8095160100	7299738198	3441538883	0.471461
NW28	49416190	43745125	20082948	0.45909	7412428500	6516634310	3002138252	0.460688
NW29	59623308	54370193	25322001	0.465733	8943496200	8104368061	3784859072	0.467015
NW2	68338182	62720446	2489495	0.0396919	10250727300	9365337282	362741644	0.0387324
NW30	44646874	36910586	35615538	0.964914	6697031100	5487700597	5295582482	0.964991
NW31	55338390	49305796	21992131	0.446035	8300758500	7344774810	3288002116	0.447665
NW32	54055474	48977015	22788500	0.46529	8108321100	7297965168	3406302617	0.466747
NW33	54031540	49281590	23311277	0.473022	8104731000	7347146034	3483664668	0.474152
NW34	116626358	97924431	94542738	0.965466	17493953700	14576724990	14074368359	0.965537
NW35	59710200	54368865	53832200	0.990129	8956530000	8116531526	8036558728	0.990147
NW3	56943836	51997098	51751287	0.995273	8541575400	7762860765	7726219592	0.99528
NW4	49222188	44948649	44936544	0.999731	7383328200	6708281848	6706479539	0.999731
NW5	45760274	41822567	41703462	0.997152	6864041100	6244436057	6226681563	0.997157
NW6	56260452	51690385	24444261	0.472898	8439067800	7719784308	3657609203	0.473797
NW7	50715430	46170009	45884048	0.993806	7607314500	6888972658	6846381172	0.993817
NW8	44917396	40070804	2309560	0.057637	6737609400	5966193511	342557920	0.0574165
NZ10	54969112	49740735	37262565	0.749136	8245366800	7417783369	5558851748	0.749395
NZ11	44610362	39396188	38135318	0.967995	6691554300	5872753555	5685040090	0.968037
NZ15	59455640	54282841	25198894	0.464215	8918346000	8102283737	3769321802	0.465217
NZ16	41793488	35718016	24560750	0.687629	6269023200	5318463247	3658050589	0.687802
NZ18	50997842	46118013	21084300	0.457181	7649676300	6866594838	3151322055	0.458935
NZ1	46164558	40232843	35469384	0.881603	6924683700	5989239229	5280671155	0.881693
NZ21	58512676	52831694	24182583	0.457729	8776901400	7872706773	3615356122	0.459227
NZ22	48654018	42306774	22024448	0.520589	7298102700	6296300773	3277929136	0.520612
NZ24	63043050	53444228	36138958	0.676199	9456457500	7931385330	5363405091	0.676226
NZ25	53800016	47809270	20346588	0.425578	8070002400	7120207923	3042385769	0.427289
NZ26	60898228	53470689	43450768	0.812609	9134734200	7958087010	6467866298	0.812741
NZ27	54613450	49957775	23319480	0.466784	8192017500	7448310139	3484272845	0.467794
NZ29	56744608	43615304	9614583	0.220441	8511691200	6435847964	1414888299	0.219845
NZ2	41996686	35717981	12497844	0.349903	6299502900	5316545300	1862269653	0.350278
NZ32	47038686	40717628	37049508	0.909913	7055802900	6063612029	5518043226	0.910026
NZ33	44403584	40658722	24177109	0.594635	6660537600	6065362001	3608128748	0.594874
NZ35	48200826	42800871	10635153	0.24848	7230123900	6371827591	1582554088	0.248367
NZ3	42679908	37391975	33784844	0.903532	6401986200	5576749389	5039748931	0.903707
NZ4	55713366	49060961	41024660	0.836198	8357004900	7304320202	6107607008	0.836164
NZ5	46272480	39555920	33380188	0.843873	6940872000	5886474330	4969965978	0.844303
NZ6	55711084	48445804	33596974	0.693496	8356662600	7205968881	5000959593	0.694002
NZ7	49436224	42799010	40767982	0.952545	7415433600	6371070969	6069181868	0.952616
S-11-071_FDME192071055-1a	57845746	48722778	48678779	0.999097	8676861900	7253586164	7247057986	0.9991
S-11_BDME192032764-1a	54094282	49571370	49554194	0.999654	8114142300	7388202495	7385648185	0.999654
S-12_BDME192032765-1a	64820282	60866914	60815662	0.999158	9723042300	9071835242	9064217188	0.99916
S-13_BDME192032766-1a	67339428	62449846	62414890	0.99944	10100914200	9309534581	9304339382	0.999442
S-14_BDME192032767-1a	56189288	53017365	52997102	0.999618	8428393200	7913309044	7910296014	0.999619
S-15_BDME192032768-1a	41808232	39106991	39080130	0.999313	6271234800	5829107491	5825120129	0.999316
S-16_BDME192032769-1a	50109556	47308883	47280002	0.99939	7516433400	7061094491	7056796514	0.999391
S-17-0037_FDME192071048-1a	53754514	45834221	45827368	0.99985	8063177100	6826158504	6825142077	0.999851
S-17_BDME192032770-1a	64522846	59869188	59756488	0.998118	9678426900	8927753811	8910993009	0.998123
S-18-0084_FDME192071051-1a	60119072	53653036	53553835	0.998151	9017860800	8007835748	7993065163	0.998155
S-18_BDME192032771-1a	66621708	61521967	61484872	0.999397	9993256200	9164813733	9159301026	0.999398
S-19-0086_FDME192071060-1a	57089452	48106182	48074795	0.999348	8563417800	7159229656	7154571656	0.999349
S-19_BDME192032772-1a	71086482	65694180	65652305	0.999363	10662972300	9789631471	9783410054	0.999364
S-1_BDME192032754-1a	54633508	50316787	49998815	0.993681	8195026200	7499003415	7451600150	0.993679
S-1_FDME192071053-1a	54101590	45718400	45669443	0.998929	8115238500	6806082068	6798813046	0.998932
S-20-0040_FDME192071062-1a	56906620	51027298	50827042	0.996076	8535993000	7617876820	7588033998	0.996083
S-2-0033_FDME192071052-1a	60138438	51114985	50913804	0.996064	9020765700	7612454278	7582581307	0.996076
S-20_BDME192032773-1a	67502368	63412323	63397698	0.999769	10125355200	9463086649	9460911537	0.99977
S-21_BDME192032774-1a	52262886	48309233	48270650	0.999201	7839432900	7206426907	7200686764	0.999203
S-21_FDME192071056-1a	58131586	49468298	49358654	0.997784	8719737900	7366140838	7349854619	0.997789
S-21_FDME192071058-1a	55003076	49156153	49139970	0.999671	8250461400	7340485704	7338079800	0.999672
S-22_BDME192032775-1a	51165426	48070247	47994714	0.998429	7674813900	7172651363	7161412576	0.998433
S-22_FDME192071049-1a	49279644	41853612	41810368	0.998967	7391946600	6234288804	6227868695	0.99897
S-23_BDME192032776-1a	60947736	56851756	56830657	0.999629	9142160400	8470100365	8466966746	0.99963
S-23_FDME192071050-1a	55336540	46310640	46080527	0.995031	8300481000	6885516148	6851306194	0.995032
S-24-0082_FDME192071063-1a	55146504	49252364	48939267	0.993643	8271975600	7353983299	7307355367	0.993659
S-24_BDME192032777-1a	49510076	46375512	46331483	0.999051	7426511400	6915341043	6908792300	0.999053
S-24_FDME192071042-1a	55484786	45844828	45106358	0.983892	8322717900	6815485131	6705988456	0.983934
S-25_BDME192032778-1a	65979030	61913888	61670153	0.996063	9896854500	9233654558	9197361202	0.996069
S-25_FDME192071039-1a	52456576	44568317	43959708	0.986344	7868486400	6635709603	6545338569	0.986381
S-26_BDME192032779-1a	52086082	48300992	48277154	0.999506	7812912300	7191825549	7188283735	0.999508
S-26_FDME192071045-1a	51935928	43685370	43649481	0.999178	7790389200	6491338871	6486008254	0.999179
S-27_BDME192032780-1a	39546004	37396102	37372487	0.999369	5931900600	5582632049	5579118887	0.999371
S-28_BDME192032781-1a	59667532	55472230	55410163	0.998881	8950129800	8272241084	8263014465	0.998885
S-28_FDME192071034-1a	51857550	46223320	45979727	0.99473	7778632500	6896560505	6860276731	0.994739
S-29_BDME192032782-1a	60376742	55412781	55292853	0.997836	9056511300	8245522612	8227694338	0.997838
S-29_FDME192071030-1a	50959390	45255750	44149415	0.975554	7643908500	6746455820	6581716423	0.975581
S-2_BDME192032755-1a	54331904	49772643	49676903	0.998076	8149785600	7397754817	7383523480	0.998076
S-30_BDME192032783-1a	60779086	56924087	56887527	0.999358	9116862900	8485962650	8480520696	0.999359
S-31_BDME192032784-1a	60409436	54970120	54899926	0.998723	9061415400	8167352440	8156926300	0.998723
S-32_BDME192032785-1a	59738178	56040849	54939586	0.980349	8960726700	8359148537	8195240363	0.980392
S-33_BDME192032786-1a	53979132	50642451	50588827	0.998941	8096869800	7552981145	7544993422	0.998942
S-34_BDME192032787-1a	54739330	51500322	51449545	0.999014	8210899500	7681266942	7673703246	0.999015
S-35_FDME192071059-1a	56906440	47981243	47659527	0.993295	8535966000	7139397041	7091656950	0.993313
S-36_BDME192032788-1a	51462036	47640913	47627887	0.999727	7719305400	7104646815	7102709967	0.999727
S-37_BDME192032789-1a	49845918	46151738	46123085	0.999379	7476887700	6885696956	6881432781	0.999381
S-38_BDME192032790-1a	55330430	50724248	50647093	0.998479	8299564500	7554775110	7543304426	0.998482
S-39_BDME192032791-1a	66413208	60953481	60877808	0.998759	9961981200	9081916851	9070661316	0.998761
S-3_BDME192032756-1a	51589684	47845165	47811949	0.999306	7738452600	7132522726	7127575329	0.999306
S-40_BDME192032792-1a	51356576	47005825	46981843	0.99949	7703486400	7002086588	6998521384	0.999491
S-41_BDME192032793-1a	49969872	46199297	46181050	0.999605	7495480800	6890901650	6888187361	0.999606
S-42_BDME192032794-1a	55195366	50470512	50440180	0.999399	8279304900	7508193869	7503682790	0.999399
S-43_BDME192032795-1a	45488558	41916135	41900352	0.999623	6823283700	6249866654	6247518350	0.999624
S-44_BDME192032796-1a	47539630	43883790	43847028	0.999162	7130944500	6544970966	6539499520	0.999164
S-45_BDME192032797-1a	54065410	49908117	49875496	0.999346	8109811500	7443151799	7438299558	0.999348
S-46_BDME192032798-1a	53172204	49015583	48962016	0.998907	7975830600	7308138314	7300166037	0.998909
S-47_BDME192032799-1a	55869124	51608162	51527971	0.998446	8380368600	7695183284	7683255624	0.99845
S-48_BDME192032800-1a	40176182	35123915	35085734	0.998913	6026427300	5226418717	5220746349	0.998915
S-49_BDME192032801-1a	47913088	44209784	44198917	0.999754	7186963200	6589532496	6587919189	0.999755
S-4_BDME192032757-1a	52896882	48286397	48242386	0.999089	7934532300	7182055715	7175526705	0.999091
S-4_FDME192071061-1a	56216234	49339728	49235080	0.997879	8432435100	7362994254	7347411206	0.997884
S-5-0083_FDME192071057-1a	50577828	42901477	42830157	0.998338	7586674200	6384347955	6373763346	0.998342
S-509_FDME192071031-1a	50721874	45273593	45204922	0.998483	7608281100	6747740702	6737506917	0.998483
S-50_BDME192032802-1a	54846816	50708000	50601513	0.9979	8227022400	7559075036	7543232637	0.997904
S-511_FDME192071032-1a	52583642	46502927	46386030	0.997486	7887546300	6915998867	6898589360	0.997483
S-515_FDME192071036-1a	52191720	46446608	46335244	0.997602	7828758000	6931302460	6914722054	0.997608
S-516_FDME192071037-1a	57950018	51588390	51511893	0.998517	8692502700	7698637855	7687248594	0.998521
S-517_FDME192071046-1a	48595312	38968018	38866789	0.997402	7289296800	5766582184	5751570970	0.997397
S-518_FDME192071038-1a	51790336	43259638	43074901	0.99573	7768550400	6422999615	6395564291	0.995729
S-519_FDME192071040-1a	70609350	60283884	56286854	0.933697	10591402500	8977732241	8389308944	0.934457
S-51_BDME192032803-1a	46313152	42613101	42598768	0.999664	6946972800	6352827036	6350695903	0.999665
S-520_FDME192071044-1a	48429188	40539917	40506557	0.999177	7264378200	6020746564	6015794401	0.999177
S-521_FDME192071035-1a	46978218	42252639	42210689	0.999007	7046732700	6301145595	6294897796	0.999008
S-523_FDME192071043-1a	51153236	43112354	43084803	0.999361	7672985400	6415656292	6411567509	0.999363
S-52_BDME192032804-1a	47834514	44079286	44040589	0.999122	7175177100	6567224439	6561466016	0.999123
S-53_BDME192032805-1a	53335578	49311404	49269968	0.99916	8000336700	7355519101	7349352021	0.999162
S-54_BDME192032806-1a	59398170	54757609	54716882	0.999256	8909725500	8160704204	8154646500	0.999258
S-55_BDME192032807-1a	54360664	50277771	50229225	0.999034	8154099600	7493579183	7486355088	0.999036
S-56_BDME192032808-1a	55817380	51458441	51440885	0.999659	8372607000	7669839326	7667228528	0.99966
S-57_BDME192032809-1a	57030170	52402185	52364343	0.999278	8554525500	7805951239	7800322124	0.999279
S-58_BDME192032810-1a	48320494	44515005	44469786	0.998984	7248074100	6635582257	6628854160	0.998986
S-59_BDME192032811-1a	45418152	41622686	41601821	0.999499	6812722800	6200604134	6197500796	0.9995
S-5_BDME192032758-1a	50310744	46907800	46869631	0.999186	7546611600	6986227435	6980551278	0.999188
S-60_BDME192032812-1a	50985304	47105846	47074567	0.999336	7647795600	7026955514	7022300682	0.999338
S-61_BDME192032813-1a	58312464	53297436	53200920	0.998189	8746869600	7934932247	7920572221	0.99819
S-62_BDME192032814-1a	47363976	43882446	43865787	0.99962	7104596400	6545745180	6543265985	0.999621
S-63_BDME192032815-1a	58951118	54287080	54128298	0.997075	8842667700	8080352958	8056735844	0.997077
S-64_BDME192032816-1a	51816542	47738451	47668285	0.99853	7772481300	7110486271	7100049909	0.998532
S-64_FDME192071033-1a	57655520	51234217	51087619	0.997139	8648328000	7637160057	7615330129	0.997142
S-6_BDME192032759-1a	52136628	48409792	48389361	0.999578	7820494200	7212790157	7209749478	0.999578
S-7-0038_FDME192071054-1a	63258576	52173609	52090008	0.998398	9488786400	7761334469	7748935644	0.998402
S-75_FDME192071041-1a	48563380	41445004	41312700	0.996808	7284507000	6172887315	6153238916	0.996817
S-7_BDME192032760-1a	55950328	51502359	51458640	0.999151	8392549200	7674833310	7668336886	0.999154
S-8-0036_FDME192071065-1a	64419050	57337822	57327603	0.999822	9662857500	8560150903	8558632499	0.999823
S-8_BDME192032761-1a	64994814	60598926	60575496	0.999613	9749222100	9031439615	9027955827	0.999614
S-9-0039_FDME192071066-1a	53755314	47982490	47972219	0.999786	8063297100	7164907980	7163379673	0.999787
S-97_FDME192071047-1a	39350306	32925914	31612802	0.960119	5902545900	4896555523	4703928912	0.960661
S-9_BDME192032762-1a	53943692	50616818	50577525	0.999224	8091553800	7549794628	7543947498	0.999226
SBCM10_S156_L002	52001456	49133733	49123010	0.999782	7852219856	7393556143	7391945163	0.999782
SBCM11_S163_L002	49340728	46554168	46538297	0.999659	7450449928	7005017858	7002633905	0.99966
SBCM12_S160_L002	53741236	50745743	50721665	0.999526	8114926636	7635976656	7632357058	0.999526
SBCM13_S158_L002	52993282	50051000	50023709	0.999455	8001985582	7531388029	7527287722	0.999456
SBCM14_S166_L002	57707982	54424400	54396721	0.999491	8713905282	8189441643	8185282377	0.999492
SBCM1_S159_L002	47054830	44568008	44560528	0.999832	7105279330	6707437966	6706314861	0.999833
SBCM2_S164_L002	52071762	49344693	48889746	0.99078	7862836062	7426615203	7358223510	0.990791
SBCM3_S154_L002	52646986	49702862	49671929	0.999378	7949694886	7479631425	7474983440	0.999379
SBCM4_S162_L002	53441960	50559218	50544059	0.9997	8069735960	7609097799	7606819942	0.999701
SBCM5_S155_L002	51801996	48884778	48863305	0.999561	7822101396	7356794127	7353566876	0.999561
SBCM6_S161_L002	47905650	45065953	45048812	0.99962	7233753150	6780214185	6777639249	0.99962
SBCM7_S157_L002	48530646	45848203	45844073	0.99991	7328127546	6899220226	6898600494	0.99991
SBCM8_S167_L002	47993528	45284215	45108675	0.996124	7247022728	6815172401	6788783379	0.996128
SBCM9_S165_L002	53325024	50514698	50419092	0.998107	8052078624	7602929814	7588558976	0.99811
SMS10	60679198	55984676	46656962	0.833388	9101879700	8357056914	6966042243	0.833552
SMS11	69814070	64760679	52566275	0.8117	10472110500	9668254077	7849731882	0.811908
SMS12	74266448	68053865	28184822	0.414155	11139967200	10151469249	4206063221	0.41433
SMS13	69093036	62863685	60872130	0.968319	10363955400	9372351285	9076181559	0.9684
SMS14	51033530	47012590	46217359	0.983085	7655029500	7015698056	6897288011	0.983122
SMS1	62918752	58021326	57755187	0.995413	9437812800	8660977748	8621327228	0.995422
SMS4	66759902	61692377	44136737	0.715433	10013985300	9203158471	6586760443	0.715707
SMS5	66864768	61239705	58054475	0.947988	10029715200	9137048521	8662318457	0.948043
SMS6	71801812	65355644	61873629	0.946722	10770271800	9747480660	9229005084	0.946809
SMS7	64120282	59002127	55770129	0.945222	9618042300	8808632245	8327066207	0.94533
SMS8	56125038	51274078	13245074	0.258319	8418755700	7647204657	1976510052	0.258462
SMS9	60510638	55852359	45013600	0.805939	9076595700	8338009397	6722052763	0.806194
SNS10	50609476	46835978	14236874	0.303973	7591421400	6996371393	2127789514	0.304128
SNS12	68246626	62549433	26875274	0.429665	10236993900	9333441984	4012969977	0.429956
SNS14	58533266	53477808	22314786	0.417272	8779989900	7976478329	3330242665	0.417508
SNS15	60277450	55557948	54693772	0.984446	9041617500	8288173141	8159388704	0.984462
SNS1	56890054	52759325	50846515	0.963745	8533508100	7879368215	7594165691	0.963804
SNS2	74216782	69125187	67961611	0.983167	11132517300	10326716945	10153183413	0.983196
SNS3	63430080	58521293	26209872	0.447869	9514512000	8734230052	3913683462	0.448086
SNS4	52511312	48804378	48414221	0.992006	7876696800	7289679258	7231507538	0.99202
SNS5	56162606	51581475	29451813	0.570977	8424390900	7697441219	4397706635	0.571321
SNS6	62064746	57162393	24799289	0.433839	9309711900	8531457792	3703211927	0.434066
SNS7	54171298	49042367	48000510	0.978756	8125694700	7307980124	7153175774	0.978817
SNS8	65895274	60571484	27911410	0.460801	9884291100	9036595849	4165982809	0.461012
SNS9	54334396	50093126	49969314	0.997528	8150159400	7476632321	7458194350	0.997534
SZCM10	55879882	52376387	52372213	0.99992	8381982300	7827189329	7826569633	0.999921
SZCM11	54293462	50872381	50868916	0.999932	8144019300	7602311176	7601797558	0.999932
SZCM12	76084264	71437984	71393375	0.999376	11412639600	10676376900	10669725310	0.999377
SZCM13	70481182	65491989	65480433	0.999824	10572177300	9783382656	9781665522	0.999824
SZCM14	64387536	60126857	60122785	0.999932	9658130400	8984629524	8984025319	0.999933
SZCM15	67026554	62575687	62456200	0.998091	10053983100	9350554138	9332724326	0.998093
SZCM16	59076966	55289535	55284368	0.999907	8861544900	8262812546	8262045164	0.999907
SZCM17	67512968	62836607	62815774	0.999668	10126945200	9387351033	9384247349	0.999669
SZCM18	56547868	52626756	52620059	0.999873	8482180200	7861718037	7860721749	0.999873
SZCM19	56955106	53472062	53467941	0.999923	8543265900	7992616897	7992005617	0.999924
SZCM1	63086898	57783776	57779056	0.999918	9463034700	8623826162	8623126880	0.999919
SZCM20	60899634	56582542	56577470	0.99991	9134945100	8452292834	8451539998	0.999911
SZCM21	53997738	50158327	50152926	0.999892	8099660700	7492784846	7491982169	0.999893
SZCM22	60135772	55974988	55959899	0.99973	9020365800	8363199082	8360951245	0.999731
SZCM23	55909096	51920544	51913092	0.999856	8386364400	7755982979	7754874584	0.999857
SZCM24	71690728	66964328	66952553	0.999824	10753609200	10004929407	10003176703	0.999825
SZCM25	70171608	65580143	65537720	0.999353	10525741200	9797645969	9791321061	0.999354
SZCM26	66794126	60846484	60826177	0.999666	10019118900	9066757560	9063742245	0.999667
SZCM27	60741456	56282947	56070398	0.996224	9111218400	8402658345	8370986532	0.996231
SZCM28	61637162	57191666	57073530	0.997934	9245574300	8540892522	8523278759	0.997938
SZCM29	65905146	61293980	61277091	0.999724	9885771900	9157276177	9154763657	0.999726
SZCM2	52594204	48463789	48406586	0.99882	7889130600	7233249377	7224720946	0.998821
SZCM30	59325946	55317206	55289308	0.999496	8898891900	8263743162	8259584667	0.999497
SZCM3	63771722	58837163	58821888	0.99974	9565758300	8782567347	8780293822	0.999741
SZCM4	59676036	55283664	55276490	0.99987	8951405400	8257183129	8256117548	0.999871
SZCM5	59606576	54719149	54708377	0.999803	8940986400	8168018605	8166416278	0.999804
SZCM6	58757922	54047575	54042452	0.999905	8813688300	8069122387	8068363540	0.999906
SZCM7	54509910	51004056	50790491	0.995813	8176486500	7621009307	7589136060	0.995818
SZCM8	66719562	62246247	62240380	0.999906	10007934300	9301032027	9300160086	0.999906
SZCM9	56068456	52173105	52037085	0.997393	8410268400	7793813552	7773521822	0.997396
XBCN10	58150254	53437749	52480284	0.982083	8722538100	7975650300	7835409480	0.982416
XBCN11	67810322	62215235	62043913	0.997246	10171548300	9282214706	9256703258	0.997252
XBCN12	51892532	44788925	43357691	0.968045	7783879800	6661306394	6448666322	0.968078
XBCN13	58966310	54373137	54355579	0.999677	8844946500	8115733313	8113122520	0.999678
XBCN14	83414606	78363479	2838547	0.0362228	12512190900	11708113467	412918452	0.0352677
XBCN15	74491824	68976161	68900609	0.998905	11173773600	10298652519	10287391021	0.998907
XBCN16	59688902	52830889	51807438	0.980628	8953335300	7867978949	7715755937	0.980653
XBCN17	58411042	54152552	53809068	0.993657	8761656300	8085606323	8034387744	0.993665
XBCN18	51162328	44073559	38277871	0.8685	7674349200	6554077704	5693007478	0.868621
XBCN19	62458836	57310594	56292750	0.98224	9368825400	8549473874	8400225249	0.982543
XBCN1	60310240	52827073	52377750	0.991494	9046536000	7863597364	7796793861	0.991505
XBCN20	60593516	55650955	830590	0.014925	9089027400	8306293607	121364245	0.0146111
XBCN21	59530934	55169404	55041713	0.997685	8929640100	8238036854	8219007369	0.99769
XBCN22	61165396	56355044	55819820	0.990503	9174809400	8411548362	8331803059	0.99052
XBCN24	55176716	48378924	48345265	0.999304	8276507400	7201785246	7196786897	0.999306
XBCN25	57158178	49535845	49388265	0.997021	8573726700	7367353541	7345428911	0.997024
XBCN26	49859868	46229573	1970579	0.0426259	7478980200	6905465048	289152146	0.0418729
XBCN27	61892508	56967985	2487325	0.0436618	9283876200	8511678893	363167186	0.0426669
XBCN28	57722690	48836207	48648528	0.996157	8658403500	7256425643	7228580130	0.996163
XBCN29	62035052	53775168	49352685	0.91776	9305257800	8000181373	7342952930	0.917848
XBCN2	56034802	48528567	48037188	0.989874	8405220300	7218717236	7145721831	0.989888
XBCN30	66463252	57239454	57157189	0.998563	9969487800	8513071539	8500857527	0.998565
XBCN31	53725258	46366536	45063251	0.971892	8058788700	6895214710	6701597040	0.97192
XBCN32	61772142	53254917	52726929	0.990086	9265821300	7917080531	7838647722	0.990093
XBCN33	71354794	64627795	3066601	0.0474502	10703219100	9628733493	446839617	0.0464069
XBCN34	60733566	49978514	44205177	0.884484	9110034900	7411893332	6556093711	0.884537
XBCN35	59362304	50290909	49991661	0.99405	8904345600	7472805520	7428398334	0.994057
XBCN3	68159998	59122181	58766365	0.993982	10223999700	8796453427	8743561849	0.993987
XBCN5	68681822	63838625	63805216	0.999477	10302273300	9534349077	9529371612	0.999478
XBCN6	55204514	47293239	46811504	0.989814	8280677100	7031971444	6960430824	0.989826
XBCN7	51537628	47623165	47526188	0.997964	7730644200	7109658147	7095203501	0.997967
XBCN8	53938850	49442350	2287001	0.0462559	8090827500	7376782790	330803357	0.0448439
XBCN9	53170598	45957004	45908675	0.998948	7975589700	6835956597	6828783578	0.998951
XBCN	57457056	47610914	47364752	0.99483	8618558400	7067184906	7030690732	0.994836
XBDN1	53202894	46001442	45961573	0.999133	7980434100	6844087353	6838168316	0.999135
XBDN2	59924006	50976955	50944860	0.99937	8988600900	7576519573	7571757114	0.999371
XBDN3	60968638	53636556	53398745	0.995566	9145295700	7987116288	7951753802	0.995573
XBDN4	64531318	55779799	55715458	0.998847	9679697700	8297987528	8288434228	0.998849
XBDN5	55504120	46800497	46777447	0.999507	8325618000	6953586157	6950169447	0.999509
XBDN6	59824000	51022854	50980594	0.999172	8973600000	7583288921	7577023106	0.999174
XBDN7	64059294	55609288	55589411	0.999643	9608894100	8274955766	8272005495	0.999643
YCN10	86709508	71297212	6445303	0.0904005	13006426200	10592998917	922085922	0.0870467
YCN11	40896402	34220561	34053533	0.995119	6134460300	5092226398	5067411369	0.995127
YCN12	43334132	36431634	35789441	0.982373	6500119800	5417601417	5322349205	0.982418
YCN14	46910900	42209758	42070390	0.996698	7036635000	6295554752	6274804845	0.996704
YCN15	47408746	41670100	40727938	0.97739	7111311900	6207685155	6067671416	0.977445
YCN16	45063600	37743230	37712406	0.999183	6759540000	5613834725	5609267464	0.999186
YCN17	48440912	42245486	42222463	0.999455	7266136800	6288188891	6284773988	0.999457
YCN18	47832890	42072820	42061686	0.999735	7174933500	6267626425	6265975985	0.999737
YCN19	40507762	35379426	35233834	0.995885	6076164300	5272493163	5250837041	0.995893
YCN20	55398526	52223837	51874551	0.993312	8309778900	7799496769	7747426599	0.993324
YCN21	45950568	40323235	40090179	0.99422	6892585200	6008569476	5973918140	0.994233
YCN22	41330682	35258304	29370672	0.833014	6199602300	5245234810	4370378967	0.833209
YCN23	49792640	43299022	42962869	0.992236	7468896000	6445659039	6395710969	0.992251
YCN24	154789256	127452778	126708231	0.994158	23218388400	18941252369	18830848200	0.994171
YCN25	106459860	88396991	88228524	0.998094	15968979000	13152691522	13127708182	0.998101
YCN26	57552142	53987694	49618450	0.91907	8632821300	8058576667	7407103488	0.919158
YCN27	41072358	35504834	29061024	0.818509	6160853700	5286834444	4328786788	0.818786
YCN28	43818438	38252243	38231392	0.999455	6572765700	5701000161	5697902668	0.999457
YCN29	41085338	35912146	35904524	0.999788	6162800700	5352402434	5351272159	0.999789
YCN30	160374258	131566656	131471368	0.999276	24056138700	19549457438	19535350773	0.999278
YCN31	661388018	542801011	533171077	0.982259	99208202700	80729686812	79299557277	0.982285
YCN32	42451956	37078544	37061221	0.999533	6367793400	5524547964	5521976928	0.999535
YCN33	45497520	39974101	39949960	0.999396	6824628000	5955472735	5951888975	0.999398
YCN34	59968428	49905602	49603503	0.993947	8995264200	7420832488	7375999426	0.993958
YCN35	41335684	36043378	34940021	0.969388	6200352600	5369957707	5205864483	0.969442
YCN4	64455452	60017837	59568427	0.992512	9668317800	8953128374	8886187270	0.992523
YCN5	44861646	37904450	37882575	0.999423	6729246900	5638133452	5634890256	0.999425
YCN6	59194258	52777385	52655342	0.997688	8879138700	7867036318	7848891637	0.997694
YCN7	57041126	53621111	53604180	0.999684	8556168900	8007000497	8004479698	0.999685
YCN8	57526288	54171657	51102744	0.943348	8628943200	8089233398	7631464599	0.94341
YCN9	47099092	41696139	41441613	0.993896	7064863800	6215086967	6177235567	0.99391
